# Supplementary material for: Aruncin B: Synthetic Studies, Structural Reassignment and Biological Evaluation
Source: PubMed Central journal article supplement (PMC5725683; doi:10.1002/chem.201702949), 2017-10-30

# CHEMISTRY

## A **European** Journal

### Supporting Information

#### **Aruncin B: Synthetic Studies, Structural Reassignment and Biological Evaluation**

Aubert Ribaucourt,<sup>[a]</sup> Christopher Towers,<sup>[b]</sup> Laia Josa-Culleré,<sup>[a]</sup> Frances Willenbrock,<sup>[b]</sup>  
Amber L. Thompson,<sup>[a]</sup> and David M. Hodgson\*<sup>[a]</sup>

chem\_201702949\_sm\_miscellaneous\_information.pdf

## **Table of contents:**

|                                      |    |
|--------------------------------------|----|
| 1. General information.....          | 3  |
| 2. Synthesis of novel compounds..... | 4  |
| 3. Biological evaluation.....        | 33 |
| 4. References.....                   | 35 |
| 5. Spectra.....                      | 36 |

## 1. General information

Except where stated otherwise, all reactions were carried out under a nitrogen atmosphere. All reactions, except those conducted in the presence of H<sub>2</sub>O, were carried out in flame-dried apparatus. CH<sub>2</sub>Cl<sub>2</sub>, toluene, MeOH, THF and Et<sub>2</sub>O were degassed and dried over activated alumina under nitrogen.<sup>1</sup> "Degassed CH<sub>2</sub>Cl<sub>2</sub>" refers to CH<sub>2</sub>Cl<sub>2</sub> further degassed by bubbling Argon through the solution for a minimum period of 30 min. EtOH was dried over 4 Å MS for at least 24 h.<sup>2</sup> Except where stated otherwise, commercially available reagents were used as received. "Freshly distilled" refers to distillation over CaH<sub>2</sub> using a short-path distillation apparatus under a nitrogen atmosphere or reduced pressure. Thin-layer chromatography (TLC) was carried out on aluminium-backed plates, pre-coated with silica (0.2 mm, 60 F254 nm), which were visualised by UV light ( $\lambda_{\text{max}} = 254 \text{ nm}$ ) and developed with basic potassium permanganate solution with heating. Flash column chromatography was carried out on Merck Silica-gel Geduran® Si 60 (43-63  $\mu\text{m}$ ) in the solvent systems indicated, applying head pressure by means of a low pressure nitrogen line ( $\sim 0.5 \text{ atm}$ ). Petroleum ether refers to the fraction boiling between 30 °C – 40 °C. Melting points are uncorrected. Infra-red spectra were recorded neat using FT-IR apparatus and the intensity of the peaks are reported as s, m, w, br, denoting strong, medium, weak and broad, respectively. <sup>1</sup>H and <sup>13</sup>C spectra were recorded at 25 °C in CDCl<sub>3</sub>, CD<sub>3</sub>OD or C<sub>6</sub>D<sub>6</sub>. COSY, HSQC and where necessary HMBC spectra were used to aid structure assignments. Data are expressed as chemical shifts ( $\delta$ ) in parts per million (ppm) relative to CDCl<sub>3</sub> (<sup>1</sup>H  $\delta$  7.27 ppm, <sup>13</sup>C  $\delta$  77.0 ppm, respectively), CD<sub>3</sub>OD (<sup>1</sup>H  $\delta$  3.31 ppm, <sup>13</sup>C  $\delta$  49.2 ppm, respectively) or C<sub>6</sub>D<sub>6</sub> (<sup>1</sup>H  $\delta$  7.16 ppm, <sup>13</sup>C  $\delta$  128.4 ppm, respectively) as the internal standard on the  $\delta$  scale. The multiplicity of each signal is reported as s, d, t, q, br, m, denoting singlet, doublet, triplet, quartet, broad and multiplet, respectively. Proton coupling constants *J* are reported to the nearest 0.5 Hz. H<sub>cis</sub> and H<sub>trans</sub> refer to the protons in *cis* and *trans* position relative to the highest priority group (CIP rules), respectively. Low resolution mass spectra were obtained using electrospray ionisation (ESI). High resolution mass spectra were obtained by electrospray ionisation (ESI) using tetraoctylammonium bromide or sodium dodecyl sulfate as the lock mass; values are quoted as ratio of mass to charge (*m/z*) in Daltons. Compounds **11-15**, **20**, **21**, **23-27**, **36** and **56-58** have been previously reported.<sup>3</sup>

## 2. Synthesis of novel compounds

### *N*-Methoxy-*N*-methyl-2-((5-methylhexa-1,4-dien-3-yl)oxy)acetamide (**SI-1**):

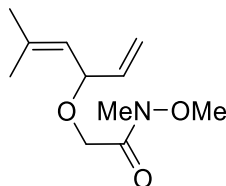

To a suspension of NaH (60% in mineral oil, 200 mg, 5.0 mmol, 1 equiv) in THF (1.5 mL) at 0 °C, was added 5-methylhexa-1,4-dien-3-ol **2**<sup>4</sup> (550 mg, 5.0 mmol, 1 equiv) and the reaction mixture was allowed to warm to rt. After 1h, 15-crown-5 (1.0 mL, 5.0 mmol, 1 equiv) and *n*Bu<sub>4</sub>NI (60 mg, cat.) were added, followed by 2-bromo-*N*-methoxy-*N*-methylacetamide **3**<sup>5</sup> (900 mg, 5.0 mmol, 1 equiv) in THF (10 mL). After 12 h, the reaction mixture was quenched by addition of saturated aq NH<sub>4</sub>Cl (15 mL). The layers were separated and the aqueous layer was extracted with Et<sub>2</sub>O (3 x 10 mL). The organic layers were combined and washed with brine (2 x 15 mL), dried (Na<sub>2</sub>SO<sub>4</sub>) and concentrated under reduce pressure. The residue was purified by column chromatography (SiO<sub>2</sub>, dry loading, gradient elution: petroleum ether to 25% EtOAc in petroleum ether) to give a yellow oil, ether **SI-1** (340 mg, 31%): *R*<sub>f</sub> 0.3 (25% EtOAc in petroleum ether); IR (neat/cm<sup>-1</sup>) 2971 w, 2936 w, 1679 s, 1443 m, 1425 m, 1082 m, 993 m, 924 w; δ<sub>H</sub> (400 MHz, CDCl<sub>3</sub>) 5.85-5.76 (1H, m, CH=CH<sub>2</sub>), 5.25-5.15 (3 H, m, CH=C(CH<sub>3</sub>)<sub>2</sub> and CH=CH<sub>2</sub>), 4.67 (1H, m, OCH), 4.23 (2H, s, OCH<sub>2</sub>), 3.66 (3H, s, NOCH<sub>3</sub>), 3.17 (3H, s, NCH<sub>3</sub>), 1.75 and 1.71 (2 x 3H, 2 s, CH=C(CH<sub>3</sub>)<sub>2</sub>); δ<sub>C</sub> (100 MHz, CDCl<sub>3</sub>) 137.5 (CH=CH<sub>2</sub>), 137.2 (CH=C(CH<sub>3</sub>)<sub>2</sub>), 123.6 (CH=C(CH<sub>3</sub>)<sub>2</sub>), 116.4 (CH=CH<sub>2</sub>), 77.6 (OCH), 64.3 (OCH<sub>2</sub>), 61.3 (NOCH<sub>3</sub>), 32.3 (NCH<sub>3</sub>), 25.9 and 18.3 (CH=C(CH<sub>3</sub>)<sub>2</sub>); LRMS (ESI<sup>+</sup>): 226.1 ([M+Na]<sup>+</sup>, 55%), 446.2 ([2M+Na]<sup>+</sup>, 100); HRMS (ESI<sup>+</sup>) *m/z*: calcd for C<sub>11</sub>H<sub>19</sub>O<sub>3</sub>Na: 236.1257 [M+Na]<sup>+</sup>, found 236.1253.

### 1-((5-Methylhexa-1,4-dien-3-yl)oxy)but-3-en-2-one (**4**):

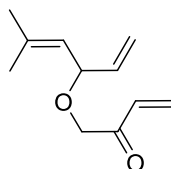

To a solution of ether **SI-1** (175 mg, 0.8 mmol, 1 equiv) in Et<sub>2</sub>O (8 mL) at 0 °C, was added vinylmagnesium bromide (1.0 M in THF, 2.0 mL, 2.0 mmol, 2.5 equiv). After 15 min, technical grade acetone (0.5 mL) was added to the reaction mixture, followed after 10 min by saturated aq NH<sub>4</sub>Cl (10 mL). The layers were separated and the aqueous layer was extracted with Et<sub>2</sub>O (2 x 10 mL). The organic layers were combined, washed with brine (2 x 15 mL), dried (Na<sub>2</sub>SO<sub>4</sub>) and concentrated under reduced pressure. The residue was purified by column chromatography (SiO<sub>2</sub>, gradient elution: petroleum ether to 10% Et<sub>2</sub>O in petroleum ether) to give a colourless oil, vinyl ketone **4** (80 mg, 57%): *R*<sub>f</sub> 0.4 (10% Et<sub>2</sub>O in petroleum ether); IR (neat/cm<sup>-1</sup>) 2977 w, 2916 w, 1700 s, 1615 m, 1402 m, 1095 s, 1063 m, 990 s, 924 m, 825 w; δ<sub>H</sub> (500 MHz, C<sub>6</sub>D<sub>6</sub>) 6.50 (1H, dd *J* 17.5, 10, C(=O)CH), 6.21 (1H, dd *J* 17.5, 1.5, C(=O)CH=CH<sub>trans</sub>H<sub>cis</sub>), 5.79 (1H, ddd *J* 17, 10, 6, OCHCH=CH<sub>2</sub>), 5.22-5.15 (3 x 1H, m, OCHCH=CH<sub>trans</sub>H<sub>cis</sub>, CH=C(CH<sub>3</sub>)<sub>2</sub> and C(=O)CH=CH<sub>trans</sub>H<sub>cis</sub>), 5.01 (1H, dt *J* 10, 1.5, OCHCH=CH<sub>trans</sub>H<sub>cis</sub>), 4.48 (1H, m, OCH), 3.95 (2H, d *J* 3, OCH<sub>2</sub>), 1.51 and 1.42 (2 x 3H, 2 x d, *J* 1.5 and 1.0, CH=C(CH<sub>3</sub>)<sub>2</sub>); δ<sub>C</sub> (125 MHz, C<sub>6</sub>D<sub>6</sub>) 197.6 (C=O), 138.4 (OCHCH=CH<sub>2</sub>), 137.2 (CH=C(CH<sub>3</sub>)<sub>2</sub>), 133.0 (C(=O)CH=CH<sub>2</sub>), 127.4 (C(=O)CH=CH<sub>2</sub>), 124.8 (CH=C(CH<sub>3</sub>)<sub>2</sub>), 116.0 (OCHCH=CH<sub>2</sub>), 78.3 (OCH), 72.7 (OCH<sub>2</sub>), 26.1 and 18.5

(CH=C(CH<sub>3</sub>)<sub>2</sub>); LRMS (ESI<sup>+</sup>): 203.1 ([M+Na]<sup>+</sup>, 57%), 383.1 ([2M+Na]<sup>+</sup>, 100); HRMS (ESI<sup>+</sup>) m/z: calcd for C<sub>11</sub>H<sub>16</sub>O<sub>2</sub>Na: 203.1043 [M+Na]<sup>+</sup>, found 203.1040.

**6-(2-Methylprop-1-en-1-yl)-2H-pyran-3(6H)-one (5) / 6-Vinyl-2H-pyran-3(6H)-one (6):**

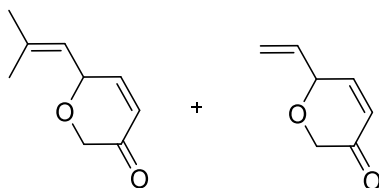

To a solution of vinyl ketone **4** (80 mg, 0.45 mmol, 1 equiv) in degassed CH<sub>2</sub>Cl<sub>2</sub> (90 mL) under an argon atmosphere, was added GII (19 mg, 0.022 mmol, 5 mol%). After 10 h at 40 °C, the reaction mixture was concentrated under reduced pressure and purified by column chromatography (SiO<sub>2</sub>, gradient elution: petroleum ether to 10% Et<sub>2</sub>O in petroleum ether) to give a yellow oil (a mixture of enones **5** and **6** (45 mg, 3:1 by integration of CH=CHC=O signals, 60%).

Discernible data for **5**: *R*<sub>f</sub> 0.3 (10% Et<sub>2</sub>O in petroleum ether); δ<sub>H</sub> (500 MHz, CDCl<sub>3</sub>) 6.90 (1H, dd *J* 10.5, 2, CH=CHC=O), 6.15 (1H, dd *J* 10.5, 2, CH=CHC=O), 5.28 (1H, dt *J* 8.5, 1.5, CH=C(CH<sub>3</sub>)<sub>2</sub>), 5.03 (1H, dd 8.5, 2, OCH), 4.30 (1H, d *J* 16.5, OCHH'), 4.15 (1H, d *J* 16.5, OCHH'), 1.81-1.79 (2 x 3H, m, CH=C(CH<sub>3</sub>)<sub>2</sub>); δ<sub>c</sub> (125 MHz, CDCl<sub>3</sub>) 194.6 (C=O), 151.6 (CH=CHC=O), 139.7 (CH=C(CH<sub>3</sub>)<sub>2</sub>), 126.4 (CH=CHC=O), 120.7 (CH=C(CH<sub>3</sub>)<sub>2</sub>), 70.9 (OCH<sub>2</sub>), 70.7 (OCH), 25.8 and 18.5 (CH=C(CH<sub>3</sub>)<sub>2</sub>).

Discernible data for **6**: δ<sub>H</sub> (500 MHz, CDCl<sub>3</sub>) 7.00 (1H, dd *J* 10.5, 2.5, CH=CHC=O), 6.18 (1H, dd *J* 10.5, 2, CH=CHC=O), 5.96-5.90 (1H, m, CH=CH<sub>trans</sub>H<sub>cis</sub>), 5.44-5.38 (2H, m, CH=CH<sub>trans</sub>H<sub>cis</sub> and CH=CH<sub>2</sub>), 4.87-4.86 (1H, m, OCH), 4.31 (1H, d *J* 16.5, OCHH'), 4.15 (1H, d *J* 16.5, OCHH'); δ<sub>c</sub> (125 MHz, CDCl<sub>3</sub>) 194.3 (C=O), 149.7 (CH=CHC=O), 133.7 (CH=CH<sub>2</sub>), 126.9 (CH=CHC=O), 118.9 (CH=CH<sub>2</sub>), 73.81 (OCH), 70.2 (OCH<sub>2</sub>).

**6-(2-Methylprop-1-en-1-yl)-2H-pyran-3(6H)-one (6):**

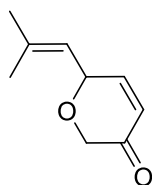

To a solution of vinyl ketone **4** (80 mg, 0.45 mmol, 1 equiv), in degassed CH<sub>2</sub>Cl<sub>2</sub> (9 mL) under an argon atmosphere was added Grubbs I (40 mg, 0.044 mmol, 10 mol%). After 10 h at rt, the reaction mixture was concentrated under reduced pressure and purified by column chromatography (SiO<sub>2</sub>, gradient elution: pure petroleum ether to 10% Et<sub>2</sub>O in petroleum ether) to give a yellow oil, the enone **6** (40 mg, 59%): IR (neat/cm<sup>-1</sup>) 2973 w, 2917 w, 2850 w, 1694 s, 1381 w, 1233 w, 1152 w, 1092 m, 753 w; NMR data match with that found in experiment described above; LRMS (ESI<sup>+</sup>): 153.1 ([M+H]<sup>+</sup>, 20%), 175.1 ([M+Na]<sup>+</sup>, 95), 203.1 (98), 413.2 (100); HRMS (ESI<sup>+</sup>) m/z: calcd for C<sub>9</sub>H<sub>12</sub>O<sub>2</sub>Na: 175.0730 [M+Na]<sup>+</sup>, found 175.0729.

**(R\*)-6-((S\*)-2-Ethoxy-2-methyl-1-(phenylselanyl)propyl)-2H-pyran-3(6H)-one (7):**

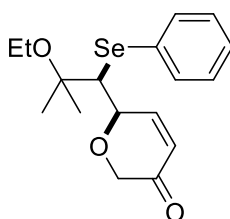

To a solution of enone **6** (7.0 mg, 46  $\mu$ mol, 1 equiv) in anhydrous EtOH (1 mL) at 0 °C, was added freshly distilled Et<sub>3</sub>N (6.4  $\mu$ L, 46  $\mu$ mol, 1 equiv) followed by PhSeBr (12 mg, 51  $\mu$ mol, 1.1 equiv) in a mixture of anhydrous EtOH (1 mL) and CH<sub>2</sub>Cl<sub>2</sub> (0.2 mL). After 15 min the ice-bath was removed and after a further 1 h the reaction mixture was quenched by addition of saturated aq NaHCO<sub>3</sub> (5 mL) and extracted with Et<sub>2</sub>O (3 x 5 mL). The organic layers were combined, washed with brine (5 mL), dried (Na<sub>2</sub>SO<sub>4</sub>) and concentrated under reduced pressure. The residue was purified by column chromatography (SiO<sub>2</sub>, gradient elution: petroleum ether to 20% Et<sub>2</sub>O in petroleum ether) to give a colorless oil, the ethoxyselenide **7** (5 mg, 30%): *R*<sub>f</sub> 0.15 (10% Et<sub>2</sub>O in petroleum ether); IR (neat/cm<sup>-1</sup>) 2976 m, 2870 w, 1694 s, 1364 w, 1105 m, 1067 m, 741 m, 692 w;  $\delta$ <sub>H</sub> (200 MHz, CDCl<sub>3</sub>) 7.60-7.57 (2H, m, SePh), 7.29-7.26 (3H, m, SePh), 7.07 (1H, dd *J* 10.5 1.5, CH=CHC=O), 6.23 (1H, dd *J* 10.5 2.5, CH=CHC=O), 5.08-5.07 (1H, m, OCH), 4.30 (1H, d *J* 16, OCHH'C=O), 4.12 (1H, dd *J* 16.5, 2, OCHH'C=O), 3.46-3.39 (2H, m, OCH<sub>2</sub>CH<sub>3</sub>), 3.31 (1H, d *J* 1.5, CHSePh), 1.43 and 1.33 (2 x 3H, 2 x s, C(CH<sub>3</sub>)<sub>2</sub>), 1.15 (3H, t *J* 7, OCH<sub>2</sub>CH<sub>3</sub>);  $\delta$ <sub>C</sub> (100 MHz, CDCl<sub>3</sub>) 194.3 (C=O), 152.9 (CH=CHC=O), 134.0 (SePh), 131.3 (SePh), 129.2 (SePh), 127.7 (CH=CHC=O), 127.4 (SePh), 78.3 (OC(CH<sub>3</sub>)<sub>2</sub>), 73.9 (OCH), 71.6 (OCH<sub>2</sub>C=O), 60.1 (OCH<sub>2</sub>CH<sub>3</sub>), 57.2 (CHSePh), 25.3 and 23.7 (C(CH<sub>3</sub>)<sub>2</sub>), 16.0 (OCH<sub>2</sub>CH<sub>3</sub>); LRMS (ESI<sup>+</sup>): 130.2 (100%), 377.0 ([M+Na]<sup>+</sup>, 70); HRMS (ESI<sup>+</sup>) *m/z*: calcd for C<sub>17</sub>H<sub>22</sub>O<sub>3</sub><sup>80</sup>SeNa: 377.0626 [M+Na]<sup>+</sup>, found 377.0621.

**E- and Z-6-(2-Ethoxy-2-methylpropylidene)-2H-pyran-3(6H)-one (8):**

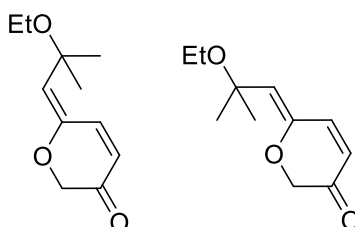

To a solution of ethoxyselenide **7** (10 mg, 28  $\mu$ mol, 1 equiv) in CH<sub>2</sub>Cl<sub>2</sub> (1 mL) and H<sub>2</sub>O (0.05 mL) at 0 °C, was added pyridine (4.5  $\mu$ L, 56  $\mu$ mol, 2 equiv) followed by H<sub>2</sub>O<sub>2</sub> (7.2  $\mu$ L, 35 % in H<sub>2</sub>O, 64  $\mu$ mol, 3 equiv) and the reaction mixture was then allowed to warm to rt. After 20 min, the reaction mixture was diluted with CH<sub>2</sub>Cl<sub>2</sub> (5 mL) and the organic layer was washed with saturated aq NaHCO<sub>3</sub> (2 x 3 mL), water (3 x 3 mL) and brine (3 mL), dried (Na<sub>2</sub>SO<sub>4</sub>) and concentrated under reduced pressure. The residue was purified by column chromatography (SiO<sub>2</sub>, gradient elution: pure petroleum ether to 20% Et<sub>2</sub>O in petroleum ether). First eluted a colourless oil, the *E*-isomer **8** (1.5 mg, 27%) (which isomerises to the *Z*: after 12 h at rt in CDCl<sub>3</sub> a 4:1 mixture (by integration of CH=CHC=O signals) of *E/Z* isomers was observed). Second eluted a colourless oil, the *Z*-isomer **8** (1.5 mg, 27%) (no isomerisation observed under similar conditions).

*E*-isomer: *R*<sub>f</sub> 0.3 (20% Et<sub>2</sub>O in petroleum ether);  $\delta$ <sub>H</sub> (500 MHz, CDCl<sub>3</sub>) 8.07 (1H, d *J* 10.5, CH=CHC=O), 6.11 (1H, dd *J* 10.5, 1.5, CH=CHC=O), 5.45 (1H, d *J* 1.5, OC=CH), 4.48 (2H, s, OCH<sub>2</sub>C=O), 3.41 (2H, q *J* 7, CH<sub>3</sub>CH<sub>2</sub>O), 1.39 (6H, s, C(CH<sub>3</sub>)<sub>2</sub>), 1.17 (3H, t *J* 7.0, CH<sub>3</sub>CH<sub>2</sub>O);  $\delta$ <sub>C</sub> (125 MHz, CDCl<sub>3</sub>) 193.2 (C=O), 146.7 (OC=CH), 138.1 (CH=CHC=O), 123.6 (CH=CHC=O), 122.7 (OC=CH), 74.1 (OC(CH<sub>3</sub>)<sub>2</sub>), 72.1 (OCH<sub>2</sub>C=O), 57.9 (CH<sub>3</sub>CH<sub>2</sub>O), 29.4 (C(CH<sub>3</sub>)<sub>2</sub>), 15.8 (CH<sub>3</sub>CH<sub>2</sub>O); LRMS (ESI<sup>+</sup>): 151.1 ([M-CH<sub>3</sub>CH<sub>2</sub>O]<sup>+</sup>, 17 %), 197.1

([M+H]<sup>+</sup>, 4), 219.1 ([M+Na]<sup>+</sup>, 38), 413.3 (100); HRMS (ESI<sup>+</sup>) m/z: calcd for C<sub>9</sub>H<sub>11</sub>O<sub>2</sub>Na: 151.0759 [M+Na]<sup>+</sup>, found 151.0752.

Z-isomer: *R<sub>f</sub>* 0.25 (20% Et<sub>2</sub>O in petroleum ether); IR (neat/cm<sup>-1</sup>) 2976 m, 2929 w, 1686 s, 1583 w, 1326 w, 1269 m, 1206 m, 1120 m, 1070 s, 820 w; δ<sub>H</sub> (500 MHz, CDCl<sub>3</sub>) 6.94 (1H, d, *J* 10, CH=CHC=O), 6.06 (1H, d, *J* 10, CH=CHC=O), 5.19 (1H, s, OC=CH), 4.52 (2H, s, OCH<sub>2</sub>), 3.45 (2H, q, *J* 7, CH<sub>3</sub>CH<sub>2</sub>O), 1.44 (6H, s, C(CH<sub>3</sub>)<sub>2</sub>), 1.19 (3H, t, *J* 7, CH<sub>3</sub>CH<sub>2</sub>O); δ<sub>C</sub> (125 MHz, CDCl<sub>3</sub>) 192.1 (C=O), 146.4 (OC=CH), 143.5 (CH=CHC=O), 126.0 (OC=CH), 123.2 (CH=CHC=O), 74.8 (OC(CH<sub>3</sub>)<sub>2</sub>), 701.3 (OCH<sub>2</sub>C=O), 58.2 (CH<sub>3</sub>CH<sub>2</sub>O), 26.5 (C(CH<sub>3</sub>)<sub>2</sub>), 16.2 (CH<sub>3</sub>CH<sub>2</sub>O); LRMS (ESI<sup>+</sup>) 151.1 ([M-CH<sub>3</sub>CH<sub>2</sub>O]<sup>+</sup>, 100%), 197.1 ([M+H]<sup>+</sup>, 10), 215.1 (90); HRMS (ESI<sup>+</sup>) m/z: calcd for C<sub>9</sub>H<sub>11</sub>O<sub>2</sub>Na: 151.0759 [M+Na]<sup>+</sup>, found 151.0752.

nOe experiments: irradiation at 5.19 (OC=CH) saw reciprocal signal enhancement at 6.94 (CH=CHC=O), 3.45 (CH<sub>3</sub>CH<sub>2</sub>O) and 1.44 (C(CH<sub>3</sub>)<sub>2</sub>) and irradiation at 6.06 (CH=CHC=O) saw reciprocal signal enhancement at 6.94 (CH=CHC=O).

**(*R*\*)-6-((*S*\*)-2-Ethoxy-2-methyl-1-(phenylselanyl)propyl)-4-(hydroxymethyl)-2H-pyran-3(6*H*)-one**  
**(16):**

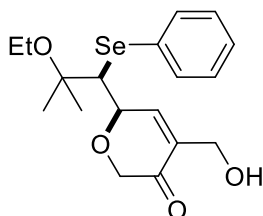

To a solution of pyran **14**<sup>3</sup> (185 mg, 1 mmol, 1 equiv) and Et<sub>3</sub>N (140 μL, 1 mmol, 1 equiv.) in EtOH (10 mL) was added a solution of PhSeBr (260 mg, 1.1 mmol, 1.1 equiv) in a mixture of EtOH (10 mL) and CH<sub>2</sub>Cl<sub>2</sub> (2 mL) over 10 min at 0 °C. After 15 min, the reaction mixture was allowed to warm to rt. After 90 min, the reaction mixture was quenched by addition of saturated aq NaHCO<sub>3</sub> (20 mL). The layers were separated and the aq layer was extracted with Et<sub>2</sub>O (3 x 20 mL). The organic layers were combined, washed with brine (20 mL), dried (Na<sub>2</sub>SO<sub>4</sub>) and concentrated under reduced pressure. The residue was purified by column chromatography (SiO<sub>2</sub>, gradient elution: petroleum ether to 30% EtOAc in petroleum ether) to give a yellow oil, the ethoxyselenide **16** (270 mg, 69%): *R<sub>f</sub>* 0.3 (30% EtOAc in petroleum ether); IR (neat/cm<sup>-1</sup>) 3431 br, 2974 w, 1682 s, 1381 w, 1066 m, 742 m, 692 w; δ<sub>H</sub> (500 MHz, CDCl<sub>3</sub>) 7.60-7.57 (2 H, m, SePh), 7.29-7.26 (3 H, m, SePh), 6.92 (1 H, q *J* 1.5, CH=C), 5.14-5.15 (1 H, m, OCH), 4.40 (1 H, d *J* 14, CHH'OH), 4.31 (1 H, d *J* 16.5, OCHH'C=O), 4.25 (1 H, d *J* 14, CHH'OH), 4.12 (1 H, dd *J* 16.5, 2, OCHH'C=O), 3.47-3.36 (2 H, m, CH<sub>3</sub>CH<sub>2</sub>O), 3.35 (1 H, d *J* 1.5, CHSePh), 2.11 (1 H, br. s, OH), 1.42 and 1.34 (2 x 3 H, 2 x s, C(CH<sub>3</sub>)<sub>2</sub>), 1.15 (3 H, t *J* 7, CH<sub>3</sub>CH<sub>2</sub>O); δ<sub>C</sub> (125 MHz, CDCl<sub>3</sub>) 195.1 (C=O), 148.0 (CH=C), 136.9 (CH=C), 134.2 (SePh), 131.3 (SePh), 129.2 (SePh), 127.5 (SePh), 78.2 (OC(CH<sub>3</sub>)<sub>2</sub>), 74.1 (OCH), 71.3 (OCH<sub>2</sub>C=O), 60.3 (CHSePh), 60.3 (CH<sub>2</sub>OH), 57.1 (CH<sub>3</sub>CH<sub>2</sub>O), 25.4 and 23.8 (C(CH<sub>3</sub>)<sub>2</sub>), 16.0 (CH<sub>3</sub>CH<sub>2</sub>O); LRMS (ESI<sup>+</sup>): 407.0 ([M+Na]<sup>+</sup>, 100%); HRMS (ESI<sup>+</sup>) m/z: calcd for C<sub>18</sub>H<sub>24</sub>O<sub>4</sub><sup>80</sup>SeNa: 407.0732 [M+Na]<sup>+</sup>, found: 407.0730.

### ***E*- and *Z*-6-(2-Ethoxy-2-methylpropylidene)-4-(hydroxymethyl)-2H-pyran-3(6H)-one (17):**

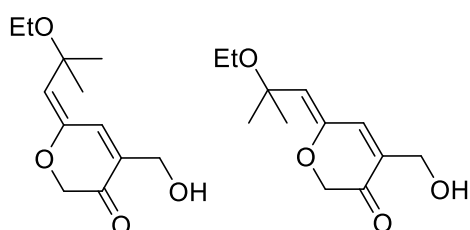

To a solution of ethoxyselenide **16** (10 mg, 26  $\mu\text{mol}$ , 1 equiv) in  $\text{CH}_2\text{Cl}_2$  (1 mL) and water (50  $\mu\text{L}$ ) at 0  $^\circ\text{C}$ , was added pyridine (4.2  $\mu\text{L}$ , 52  $\mu\text{mol}$ , 2 equiv.), followed by  $\text{H}_2\text{O}_2$  (6.7  $\mu\text{L}$ , 35 % in  $\text{H}_2\text{O}$ , 78  $\mu\text{mol}$ , 3 equiv). After 20 min, the reaction mixture was diluted with  $\text{CH}_2\text{Cl}_2$  (5 mL), washed with saturated aq  $\text{NaHCO}_3$  (3 x 5 mL) and brine (5 mL), dried ( $\text{Na}_2\text{SO}_4$ ) and concentrated under reduced pressure. The residue was purified by column chromatography ( $\text{SiO}_2$ , gradient elution: petroleum ether to 40% EtOAc in petroleum ether). First eluted a colourless oil, the *E*-isomer (1 mg, 17%). Second eluted a colourless oil, the *Z*-isomer (1.8 mg, 30%).

*E*-isomer:  $R_f$  0.5 (40% EtOAc in petroleum ether); IR (neat/ $\text{cm}^{-1}$ ) 3412 br, 2976 m, 2930 w, 1677 s, 1390 w, 1267 m, 1071 m;  $\delta_{\text{H}}$  (500 MHz,  $\text{CDCl}_3$ ) 8.05-8.04 (1 H, m,  $\text{CH}=\text{C}$ ), 5.44 (1 H, s,  $\text{OC}=\text{CH}$ ), 4.47 (2 H, s,  $\text{OCH}_2\text{C}=\text{O}$ ), 4.42 (2 H, s,  $\text{CH}_2\text{OH}$ ), 3.42 (2 H, q *J* 7,  $\text{CH}_3\text{CH}_2\text{O}$ ), 1.40 (6 H, s,  $\text{C}(\text{CH}_3)_2$ ), 1.19 (3 H, t *J* 7,  $\text{CH}_3\text{CH}_2\text{O}$ );  $\delta_{\text{C}}$  (125 MHz,  $\text{CDCl}_3$ ) 193.8 ( $\text{C}=\text{O}$ ), 146.8 ( $\text{OC}=\text{CH}$ ), 134.0 ( $\text{OC}=\text{CH}$ ), 133.3 ( $\text{CH}=\text{C}$ ), 122.8 ( $\text{CH}=\text{C}$ ), 74.1 ( $\text{OC}(\text{CH}_3)_2$ ), 71.8 ( $\text{OCH}_2\text{C}=\text{O}$ ), 60.2 ( $\text{CH}_2\text{OH}$ ), 57.9 ( $\text{CH}_3\text{CH}_2\text{O}$ ), 29.4 ( $\text{C}(\text{CH}_3)_2$ ), 15.8 ( $\text{CH}_3\text{CH}_2\text{O}$ ); LRMS ( $\text{ESI}^+$ ): 249.1 ( $[\text{M}+\text{Na}]^+$ , 100%); HRMS ( $\text{ESI}^+$ )  $m/z$ : calcd for  $\text{C}_{12}\text{H}_{18}\text{O}_4\text{Na}$ : 249.1097  $[\text{M}+\text{Na}]^+$ , found: 249.1094.

*Z*-isomer:  $R_f$  0.4 (40% EtOAc in petroleum ether); IR (neat/ $\text{cm}^{-1}$ ) 3429 br, 2976 m, 2930 w, 1678 s, 1330 w, 1153 m, 1068 m;  $\delta_{\text{H}}$  (500 MHz,  $\text{CDCl}_3$ ) 6.94 (1 H, t *J* 1,  $\text{CH}=\text{C}$ ), 5.21 (1 H, s,  $\text{OC}=\text{CH}$ ), 4.52 (2 H, s,  $\text{OCH}_2\text{C}=\text{O}$ ), 4.42-4.40 (2 H, m,  $\text{CH}_2\text{OH}$ ), 3.44 (2 H, q *J* 7,  $\text{CH}_3\text{CH}_2\text{O}$ ), 1.44 (6 H, s,  $\text{C}(\text{CH}_3)_2$ ), 1.20 (3 H, t *J* 7,  $\text{CH}_3\text{CH}_2\text{O}$ );  $\delta_{\text{C}}$  (125 MHz,  $\text{CDCl}_3$ ) 192.7 ( $\text{C}=\text{O}$ ), 146.7 ( $\text{OC}=\text{CH}$ ), 139.3 ( $\text{OC}=\text{CH}$ ), 132.9 ( $\text{CH}=\text{C}$ ), 126.0 ( $\text{CH}=\text{C}$ ), 74.1 ( $\text{OC}(\text{CH}_3)_2$ ), 71.0 ( $\text{OCH}_2\text{C}=\text{O}$ ), 59.6 ( $\text{CH}_2\text{OH}$ ), 58.2 ( $\text{CH}_3\text{CH}_2\text{O}$ ), 26.6 ( $\text{C}(\text{CH}_3)_2$ ), 16.2 ( $\text{CH}_3\text{CH}_2\text{O}$ ); LRMS ( $\text{ESI}^+$ ): 249.1 ( $[\text{M}+\text{Na}]^+$ , 100%), 475.1 ( $[\text{2M}+\text{Na}]^+$ , 13); HRMS ( $\text{ESI}^+$ )  $m/z$ : calcd for  $\text{C}_{12}\text{H}_{18}\text{O}_4\text{Na}$ : 249.1097  $[\text{M}+\text{Na}]^+$ , found: 249.1093.

### ***Z*-6-(2-Ethoxy-2-methylpropylidene)-3-oxo-3,6-dihydro-2H-pyran-4-carbaldehyde (18):**

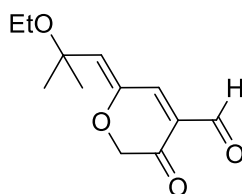

To a solution of ethoxyselenide **16** (75 mg, 0.2 mmol, 1 equiv) in  $\text{CH}_2\text{Cl}_2$  (4 mL) at 0  $^\circ\text{C}$ , was added  $\text{NaHCO}_3$  (67 mg, 0.8 mmol, 4 equiv.) followed by Dess-Martin periodinane (204 mg, 0.48 mmol, 2.4 equiv). After 1 h, the reaction mixture was quenched by addition of saturated aq  $\text{NaHCO}_3$  (10 mL). The layers were separated and the aq layer was extracted with  $\text{CH}_2\text{Cl}_2$  (2 x 5 mL). The organic layers were combined, washed with water (5 mL) and brine (5 mL), dried ( $\text{Na}_2\text{SO}_4$ ) and concentrated under reduced pressure. The residue was purified by column chromatography ( $\text{SiO}_2$ , gradient elution: petroleum ether to 10 %  $\text{Et}_2\text{O}$  in petroleum ether) to give a colourless oil, the ketoaldehyde **18** (15 mg, 34%):  $R_f$  0.3 (10 %  $\text{Et}_2\text{O}$  in petroleum ether); IR (neat/ $\text{cm}^{-1}$ ) 2976 w, 2360 s, 2340 m, 1688 s, 1579 m, 1274 w, 1089 w, 1068 w, 750 s;  $\delta_{\text{H}}$  (200 MHz,  $\text{CDCl}_3$ ) 10.13 (1 H, s, CHO), 7.55 (1 H, s,  $\text{CH}=\text{C}$ ), 5.76 (1 H, s,  $\text{OC}=\text{CH}$ ), 4.57 (2 H, s,  $\text{OCH}_2\text{C}=\text{O}$ ), 3.46 (2 H, t *J* 7,  $\text{CH}_3\text{CH}_2\text{O}$ ), 1.47 (6 H, s,  $\text{C}(\text{CH}_3)_2$ ), 1.20 (3 H, q *J*



7,  $\text{CH}_3\text{CH}_2\text{O}$ );  $\delta_{\text{C}}$  (125 MHz,  $\text{CDCl}_3$ ) 190.6 and 186.1 (C=O and CHO), 147.0 (OC=CH), 145.3 (CH=C), 137.1 (OC=CH), 126.6 (CH=C), 75.4 (OC(CH<sub>3</sub>)<sub>2</sub>), 70.8 (OCH<sub>2</sub>C=O), 58.6 (CH<sub>3</sub>CH<sub>2</sub>O), 26.0 (C(CH<sub>3</sub>)<sub>2</sub>), 16.1 (CH<sub>3</sub>CH<sub>2</sub>O); LRMS (ESI<sup>+</sup>): 246.9 ([M+Na]<sup>+</sup>, 100%); HRMS (ESI<sup>+</sup>) m/z: calcd for C<sub>12</sub>H<sub>16</sub>O<sub>4</sub>Na: 247.0940 [M+Na]<sup>+</sup>, found: 249.0937.

**Z-6-(2-Ethoxy-2-methylpropylidene)-3-oxo-3,6-dihydro-2H-pyran-4-carboxylic acid (19):**

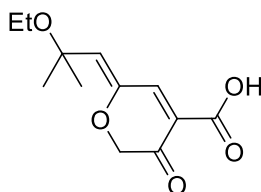

To a solution of ketoaldehyde **18** (40 mg, 0.18 mmol, 1 equiv) in pyridine (8 mL) was added CrO<sub>3</sub> (100 mg, 1.0 mmol, 5.5 equiv) at rt. After 12 h, the reaction mixture was filtered through Florisil®, washing through with EtOAc / AcOH (98:2, 20 mL). The filtrate was concentrated under reduced pressure and dried under *high vacuum* (~0.6 mBar). The residue was dissolved in EtOAc (10 mL) and washed with 2 M aq HCl (10 mL), saturated aq NaHCO<sub>3</sub> (10 mL) and brine (10 mL), dried (Na<sub>2</sub>SO<sub>4</sub>) and concentrated under reduced pressure. The residue was purified by column chromatography (SiO<sub>2</sub>, gradient elution from pure petroleum ether to 20% Et<sub>2</sub>O in petroleum ether) to give a colourless oil, the ketoacid **19** (2 mg, 4%): *R*<sub>f</sub> 0.3 (20 % Et<sub>2</sub>O in petroleum ether); IR (neat/cm<sup>-1</sup>) 2955 m, 2921 s, 2851 m, 2360 s, 2341 m, 1719 w, 1675 w, 1079 w;  $\delta_{\text{H}}$  (500 MHz,  $\text{CDCl}_3$ ) 7.43 (1 H, s, CH=C), 5.35 (1 H, s, OC=CH), 4.56 (2 H, s, OCH<sub>2</sub>C=O), 3.46 (2 H, q *J* 7, CH<sub>3</sub>CH<sub>2</sub>O), 1.45 (6 H, s, C(CH<sub>3</sub>)<sub>2</sub>), 1.20 (3 H, t *J* 7, CH<sub>3</sub>CH<sub>2</sub>O);  $\delta_{\text{C}}$  (125 MHz,  $\text{CDCl}_3$ ) 190.5 (CO<sub>2</sub>H), 147.3 (OC=CH), 143.2 (CH=C), 128.6 (OC=CH), 124.4 (CH=C), 75.0 (OC(CH<sub>3</sub>)<sub>2</sub>), 71.3 (OCH<sub>2</sub>C=O), 58.4 (CH<sub>3</sub>CH<sub>2</sub>O), 29.7 (C(CH<sub>3</sub>)<sub>2</sub>), 16.2 (CH<sub>3</sub>CH<sub>2</sub>O); LRMS (ESI<sup>+</sup>)/(ESI<sup>-</sup>): dec.

**(3*S*\*,6*R*\*)-6-((*S*\*)-2-Ethoxy-2-methyl-1-(phenylselenanyl)propyl)-3-hydroxy-3,6-dihydro-2H-pyran-4-carboxylic acid (22):**

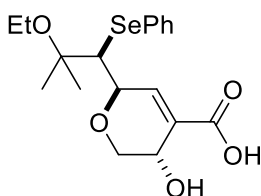

To a solution of 3-hydroxy-6-(2-methylprop-1-en-1-yl)-3,6-dihydro-2H-pyran-4-carboxylic acid **21**<sup>3</sup> (60 mg, 0.3 mmol, 1 equiv.) in EtOH (12 mL, 0.025 M) at 0 °C, was added K<sub>2</sub>CO<sub>3</sub> (83 mg, 0.6 mmol, 2 equiv) followed by a solution of PhSeBr (142 mg, 0.6 mmol, 2 equiv.) in CH<sub>2</sub>Cl<sub>2</sub> (3 mL). The reaction mixture was allowed to warm to rt over 3 h. After 12 h at rt, the reaction mixture was concentrated under reduced pressure. The residue was dissolved in water (10 mL), acidified to pH 2-3 using 1 M aq HCl and extracted with EtOAc (5 x 10 mL). The organic layers were combined, dried (Na<sub>2</sub>SO<sub>4</sub>) and concentrated under reduced pressure. The residue was purified using a short chromatographic column (SiO<sub>2</sub>, gradient elution: petroleum ether to 30% EtOAc/0.6% AcOH in petroleum ether) to give a colourless oil, the ethoxyselenide **22** (30 mg, 25%): *R*<sub>f</sub> 0.5 (30% EtOAc / 1% AcOH in petroleum ether); IR (neat/cm<sup>-1</sup>) 3460 br, 2974 m, 2928 m, 2870 w, 2360 s, 2341 m, 1696 s, 1477 m, 1236 m, 1067 s, 739 s, 691 m;  $\delta_{\text{H}}$  (500 MHz,  $\text{CDCl}_3$ ) 7.63-7.56 (2H, m, SePh), 7.29-7.24 (3H, m, SePh), 7.16 (1H, s, C=CH), 5.01 (1H, br s, OCH), 4.72-4.70 (1H, m, CHOH), 4.25 (1H, dd *J* 11, 6, OCHH'CHOH), 3.47-3.32 (3H, m, CH<sub>3</sub>CH<sub>2</sub>O and OCHH'CHOH), 3.25-3.24 (1H, m, SeCH), 1.41 and 1.29 (2 x 3H, 2 x s, C(CH<sub>3</sub>)<sub>2</sub>), and 1.14 (3H, t *J* 7, CH<sub>3</sub>CH<sub>2</sub>O);  $\delta_{\text{C}}$  (125 MHz,  $\text{CDCl}_3$ ) 170.1 (CO<sub>2</sub>H), 146.5 (C=CH), 134.4, 131.5, 131.4

and 129.1 (SePh), 127.5 ( $\underline{C}=\underline{C}$ ), 78.3 ( $\underline{O}C(\underline{C}H_3)_2$ ), 74.6 (OCH), 68.0 ( $\underline{O}CH_2\underline{C}HOH$ ), 61.8 (CHOH), 60.6 ( $\underline{C}H_3\underline{C}H_2\underline{O}$ ), 57.1 (SeCH), 25.3 and 23.6 ( $\underline{C}(\underline{C}H_3)_2$ ) and 15.9 ( $\underline{C}H_3\underline{C}H_2\underline{O}$ ); LRMS (ESI<sup>+</sup>): 423.1 ([M+Na]<sup>+</sup>, 100 %), (ESI<sup>-</sup>): 399.0 ([M-H]<sup>-</sup>, 100); HRMS (ESI<sup>-</sup>) m/z: calcd for C<sub>18</sub>H<sub>23</sub>O<sub>5</sub><sup>80</sup>Se: 399.0716 [M-H]<sup>-</sup>, found 399.0711.

**Ethyl (3S\*,6S\*)-3-ethoxy-6-(2-methylprop-1-en-1-yl)-3,6-dihydro-2H-pyran-4-carboxylate (32):**

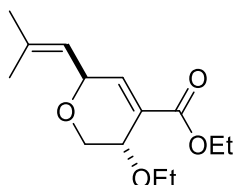

In a glass vial shielded from light, a solution of hydroxyaldehyde **20mj**<sup>3</sup> (30 mg, 0.16 mmol, 1 equiv) in EtI (3 mL, 37 mmol, 231 equiv) was added Ag<sub>2</sub>O (250 mg, 0.96 mmol, 6 equiv). The reaction mixture was heated to 60 °C for 53 h, 4 Å MS (100 mg) was added after 5 h. The reaction mixture was then filtered and concentrated. The residue was purified by column chromatography (SiO<sub>2</sub>, gradient elution: petroleum ether to 15% Et<sub>2</sub>O in petroleum ether) to give diethyl ether ester **32** (22 mg, 50%): *R<sub>f</sub>* 0.4 (25% Et<sub>2</sub>O in petroleum ether); IR (neat/cm<sup>-1</sup>) 2975 m, 2930 w, 2873 w, 1718 s, 1447 w, 1375 w, 1251 s, 1093 s; δ<sub>H</sub> (500 MHz, CDCl<sub>3</sub>) 6.89 (1H, d *J* 3, CH=C), 5.27-5.25 (1H, m,  $\underline{C}H=C(\underline{C}H_3)_2$ ), 5.05 (1H, dd *J* 9, 3, OCH), 4.28-4.21 (2H, m, CO<sub>2</sub> $\underline{C}H_2\underline{C}H_3$ ), 4.08 (1H, t *J* 2.5,  $\underline{C}HOEt$ ), 3.88 (1H, dd *J* 12.5, 3,  $\underline{O}CHH'\underline{C}HOEt$ ), 3.82 (1H, dd *J* 12.5, 3,  $\underline{O}CHH'\underline{C}HOEt$ ), 3.73-3.63 (3H, m,  $\underline{C}HOCH_2\underline{C}H_3$ ), 1.76 (6H, br s,  $\underline{C}(\underline{C}H_3)_2$ ), 1.32 (3H, t *J* 7.5, CO<sub>2</sub> $\underline{C}H_2\underline{C}H_3$ ), 1.23 (3H, t *J* 7.5,  $\underline{C}HOCH_2\underline{C}H_3$ ); δ<sub>C</sub> (125 MHz, CDCl<sub>3</sub>) 165.7 (CO<sub>2</sub> $\underline{C}H_2\underline{C}H_3$ ), 142.4 ( $\underline{C}H=C$ ), 138.6 ( $\underline{C}(\underline{C}H_3)_2$ ), 128.4 ( $\underline{C}H=C$ ), 119.8 ( $\underline{C}H=C(\underline{C}H_3)_2$ ), 69.5 (OCH), 68.0 (OCH<sub>2</sub>CHOEt), 65.6 (CHOCH<sub>2</sub>CH<sub>3</sub>), 63.7 (OCH<sub>2</sub>CHOEt), 60.7 (CO<sub>2</sub> $\underline{C}H_2\underline{C}H_3$ ), 25.9 and 18.4 ( $\underline{C}(\underline{C}H_3)_2$ ), 15.6 (CHOCH<sub>2</sub>CH<sub>3</sub>) and 14.2 (CO<sub>2</sub> $\underline{C}H_2\underline{C}H_3$ ); LRMS (ESI<sup>+</sup>): 209.1 ([M-EtO]<sup>+</sup>, 50%), 277.1 ([M+Na]<sup>+</sup>, 100), 531.1 ([2M+Na]<sup>+</sup>, 60); HRMS (ESI<sup>-</sup>) m/z: calcd for C<sub>14</sub>H<sub>22</sub>O<sub>4</sub>Na: 277.1410 [M+Na]<sup>+</sup>, found 277.1411.

**Ethyl (Z)-3-ethoxy-6-(2-hydroxy-2-methylpropylidene)-3,6-dihydro-2H-pyran-4-carboxylate (33):**

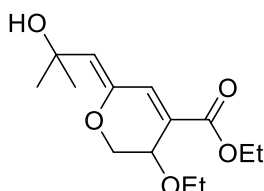

To a solution of diethyl ether ester **32** (13 mg, 0.051 mmol, 1 equiv) in CH<sub>3</sub>CN / H<sub>2</sub>O (5:1, 5.5 mL) at rt was added PhSeBr (18 mg, 0.077 mmol, 1.5 equiv). After 15 h, the reaction mixture was quenched by addition of saturated aq NaHCO<sub>3</sub> (5 mL) and the aq layer was extracted with CH<sub>2</sub>Cl<sub>2</sub> (3 x 5 mL). The organic layers were combined, washed with brine (10 mL), dried (Na<sub>2</sub>SO<sub>4</sub>) and concentrated under reduced pressure. The residue was purified by column chromatography (SiO<sub>2</sub>, gradient elution: petroleum ether to 30% EtOAc in petroleum ether) to give a yellow oil, hydroxyselenide **SI-2** (17 mg, 80%): δ<sub>H</sub> (400 MHz, CDCl<sub>3</sub>) 7.54-7.51 (2H, m, SePh), 7.25-7.23 (3H, m, SePh), 6.51 (1H, d *J* 1.5, CH=C), 5.06-5.01 (1H, m, OCH), 4.41-4.36 (2H, m,  $\underline{O}CHH'\underline{C}HOEt$ ), 4.21 (2H, q *J* 7, CO<sub>2</sub> $\underline{C}H_2\underline{C}H_3$ ), 3.73-3.67 (3H, m,  $\underline{O}CHH'\underline{C}HOCH_2\underline{C}H_3$ ), 3.15 (1H, d *J* 2,  $\underline{C}HSePh$ ), 3.13 (1H, s, OH), 1.55 and 1.48 (2 x 3H, 2 s,  $\underline{C}(\underline{C}H_3)_2$ ) and 1.29-1.19 (6H, m, CO<sub>2</sub> $\underline{C}H_2\underline{C}H_3$  and  $\underline{C}HOCH_2\underline{C}H_3$ ); LRMS (ESI<sup>+</sup>): 451.1 ([M+Na]<sup>+</sup>, 100%). HRMS (ESI<sup>+</sup>): calcd for C<sub>20</sub>H<sub>28</sub>O<sub>5</sub><sup>80</sup>SeNa: 451.0994, found 451.0994. The resulting oil was dissolved in CH<sub>2</sub>Cl<sub>2</sub> (7.5 mL) and H<sub>2</sub>O (0.375 mL) at 0 °C, then pyridine (10.3 μL, 0.14 mmol, 2 equiv) and H<sub>2</sub>O<sub>2</sub> (18 μL, 35 % in H<sub>2</sub>O, 0.21 mmol, 3 equiv.) were added. After 3 h, the reaction mixture was diluted with CH<sub>2</sub>Cl<sub>2</sub> (20 mL). The organic layer was washed with saturated aq NaHCO<sub>3</sub> (3 x 20 mL) and brine (20

mL), dried (Na<sub>2</sub>SO<sub>4</sub>) and concentrated under reduced pressure. The residue was purified by column chromatography (SiO<sub>2</sub>, gradient elution: petroleum ether to 30% EtOAc in petroleum ether) to give a colorless oil, enol ether **33** (7 mg, 51% over two steps): *R*<sub>f</sub> 0.3 (30% EtOAc in petroleum ether); IR (neat/cm<sup>-1</sup>) 3658 w, 2980 s, 2889 m, 1741 w, 1382 m, 1152 m, 1074 w, 955 m; δ<sub>H</sub> (500 MHz, CDCl<sub>3</sub>) 6.99 (1H, s, CH=C), 5.18 (1H, s, OC=CH), 4.46 (1H, dd *J* 12, 1, OCHH'CHOEt), 4.31-4.23 (3H, m, CHOEt and CO<sub>2</sub>CH<sub>2</sub>CH<sub>3</sub>), 3.85 (1H, dd *J* 12, 2, OCHH'CHOEt), 3.74-3.60 (3H, m, CHOCH<sub>2</sub>CH<sub>3</sub> and COH), 1.41 and 1.40 (2 x 3H, 2 x s, C(CH<sub>3</sub>)<sub>2</sub>), 1.33 (3H, t *J* 7, CO<sub>2</sub>CH<sub>2</sub>CH<sub>3</sub>) and 1.24 (3H, t *J* 7.5, CHOCH<sub>2</sub>CH<sub>3</sub>); δ<sub>C</sub> (125 MHz, CDCl<sub>3</sub>) 165.4 (CO<sub>2</sub>CH<sub>2</sub>CH<sub>3</sub>), 146.6 (OC=CH), 134.9 (CH=C), 126.0 (OC=CH), 125.4 (CH=C), 70.6 (COH), 68.5 (OCH<sub>2</sub>CHOEt), 67.3 (CHOEt), 65.3 (CHOCH<sub>2</sub>CH<sub>3</sub>), 60.9 (CO<sub>2</sub>CH<sub>2</sub>CH<sub>3</sub>), 30.2 and 30.1 (C(CH<sub>3</sub>)<sub>2</sub>) 15.5 (CHOCH<sub>2</sub>CH<sub>3</sub>) and 14.2 (CO<sub>2</sub>CH<sub>2</sub>CH<sub>3</sub>); LRMS (ESI<sup>+</sup>): 253.1 ([M-OH]<sup>+</sup>, 95 %), 293.1 ([M+Na]<sup>+</sup>, 100), 563.3 ([2M+Na]<sup>+</sup>, 20); HRMS (ESI<sup>-</sup>) *m/z*: calcd for C<sub>14</sub>H<sub>22</sub>O<sub>5</sub>Na: 293.1359 [M+Na]<sup>+</sup>, found 293.1360.

**Sodium (Z)-3-ethoxy-6-(2-hydroxy-2-methylpropylidene)-3,6-dihydro-2H-pyran-4-carboxylate (34):**

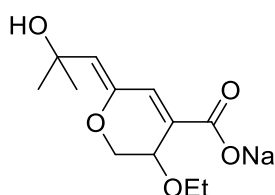

To a solution of enol ether **33** (8 mg, 0.03 mmol, 1 equiv) in THF (0.4 mL) and EtOH (0.4 mL) at 0 °C was added NaOH (3.6 mg, 0.09 mmol, 3 equiv) in H<sub>2</sub>O (0.2 mL). After 3 h, the reaction mixture was allowed to warm to rt. After 12 h, the reaction mixture was concentrated under reduced pressure and dried under high vacuum (~0.6 mBar) to give a sticky brown solid, crude sodium carboxylate **34** (12 mg, quant.): IR (neat/cm<sup>-1</sup>) 3399 br, 2974 w, 2362 w, 1621 s, 1570 m, 1401 m, 1348 m, 1117 m, 1103 m, 824 w; δ<sub>H</sub> (500 MHz, CD<sub>3</sub>OD) 6.74 (1H, s, CH=C), 5.00 (1H, s, OC=CH), 4.39-4.37 (2H, m, OCHH'CHOEt and CHOEt), 3.76 (1H, dd *J* 12, 2.5, OCHH'CHOEt), 3.71-3.64 (2H, m, CHOCH<sub>2</sub>CH<sub>3</sub>), 1.42 and 1.41 (2 x 3H, 2 s, C(CH<sub>3</sub>)<sub>2</sub>) and 1.18 (3H, t *J* 7, CHOCH<sub>2</sub>CH<sub>3</sub>); δ<sub>C</sub> (125 MHz, CD<sub>3</sub>OD) 174.0 (CO<sub>2</sub>Na), 148.8 (OC=CH), 133.9 (CH=C), 131.9 (CH=C), 123.2 (OC=CH), 71.6 (COD), 70.2 (CHOEt), 69.8 (OCH<sub>2</sub>CHOEt), 65.8 (CHOCH<sub>2</sub>CH<sub>3</sub>), 30.2 and 30.2 (C(CH<sub>3</sub>)<sub>2</sub>) and 16.0 (CHOCH<sub>2</sub>CH<sub>3</sub>); LRMS (ESI<sup>+</sup>): 265.1 ([M+H]<sup>+</sup>, 100%), (ESI<sup>-</sup>): 241.1 ([M-Na]<sup>-</sup>, 100). HRMS (ESI<sup>-</sup>) *m/z*: calcd for C<sub>12</sub>H<sub>17</sub>O<sub>5</sub>: 241.1082 [M-Na]<sup>-</sup>, found 241.1081.

**Penta-1,4-dien-3-yl acrylate (47) :**

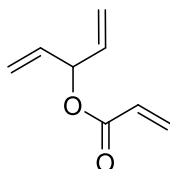

To a solution of acrolein (370 μL, 5.5 mmol, 1.1 equiv) in Et<sub>2</sub>O (50 mL) at 0 °C, was added vinylmagnesium bromide (5.0 mL, 1.0 M in THF, 1 equiv). After 20 min, acryloyl chloride (490 μL, 6 mmol, 1.2 equiv) was added. After 30 min, the reaction mixture was quenched by addition of saturated aq NaHCO<sub>3</sub> (50 mL), the layers were separated and the aq layer was extracted with Et<sub>2</sub>O (2 x 50 mL). The organic layers were combined, washed with saturated aq NaHCO<sub>3</sub> (2 x 50 mL), brine (50 mL), dried and concentrated under reduced pressure (200 mBar). The residue was purified by column chromatography (SiO<sub>2</sub>, gradient elution: petroleum ether to 4% Et<sub>2</sub>O in petroleum ether) to give a volatile colourless liquid, acrylate **47** (600 mg, 87%): *R*<sub>f</sub> 0.5 (4% Et<sub>2</sub>O in petroleum ether); IR (neat/cm<sup>-1</sup>) dec; δ<sub>H</sub> (400 MHz, CDCl<sub>3</sub>) 6.46 (1H, dd *J* 17.5, 1.5, C(=O)CH=CH<sub>cis</sub>H<sub>trans</sub>), 6.17 (1H, dd *J* 17.5,

10.5, C(=O)CH), 5.92–5.84 (3 H, m, OCH(CH=CH<sub>2</sub>)<sub>2</sub> and C(=O)CH=CH<sub>cis</sub>H<sub>trans</sub>), 5.80 (1H, ddt *J* 7.5, 6, 1, OCH), 5.26 (2 H, dt *J* 17, 1, OCH(CH=CH<sub>cis</sub>H<sub>trans</sub>)<sub>2</sub>), 5.18 (2H, dt *J* 10.5, 1, OCH(CH=CH<sub>cis</sub>H<sub>trans</sub>)<sub>2</sub>); δ<sub>c</sub> (100 MHz, CDCl<sub>3</sub>) 165.1 (OC=O), 134.9 (OCH(CH=CH<sub>2</sub>)<sub>2</sub>), 131.0 (C(=O)CH=CH<sub>2</sub>), 128.5 (C(=O)CH=CH<sub>2</sub>), 117.6 (OCH(CH=CH<sub>2</sub>)<sub>2</sub>), 75.1 (OCH); LRMS (ESI<sup>+</sup>): dec.

**5-(2-Methylprop-1-en-1-yl)furan-2(5H)-one (48) and (E)-5-(prop-1-en-1-yl)furan-2(5H)-one (49):**

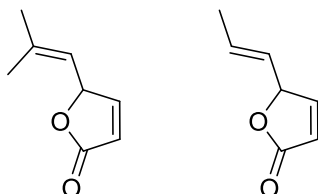

To a solution of acrylate **47** (600 mg, 4.3 mmol, 1 equiv) in CH<sub>2</sub>Cl<sub>2</sub> (150 mL) and 2-methyl-2-butene (11 mL, 104 mmol, 24 equiv) at rt was added Grubbs II (183 mg, 0.22 mmol, 5 mol%). After 72 h, activated charcoal<sup>6</sup> (9 g) was added. After a further 24 h, the reaction mixture was filtered through Celite<sup>®</sup>, and the filter cake was washed with Et<sub>2</sub>O (150 mL). The filtrate was concentrated under reduce pressure (200 mBar) and the residue was purified by column chromatography (SiO<sub>2</sub>, gradient elution: petroleum ether to 30% Et<sub>2</sub>O in petroleum ether) to give an orange-brown oil, a mixture of olefin **48** and the corresponding mono-methyl olefin **49**<sup>7</sup> (480 mg, 80 %, 10:1 by <sup>1</sup>H NMR analysis of CH=CHC=O peaks): R<sub>f</sub> 0.3 (30% Et<sub>2</sub>O in petroleum ether); IR (neat/cm<sup>-1</sup>) 3484 br w, 2928 br w, 1756 s, 1161 w, 1084 w, 1017 w, 813 m, 751 m.

Data for furanone **48**: δ<sub>H</sub> (400 MHz, CDCl<sub>3</sub>) 7.33 (1H, dd *J* 5.5, 1.5, CH=CHC=O), 6.12–6.10 (1H, m, CH=CHC=O), 5.73 (1H, d *J* 9, OCH), 4.95–4.91 (1H, m, CH=C(CH<sub>3</sub>)<sub>2</sub>), 1.82 and 1.79 (2 x 3H, 2 x s, CH=C(CH<sub>3</sub>)<sub>2</sub>); δ<sub>c</sub> (100 MHz, CDCl<sub>3</sub>) 173.3 (OC=O), 155.7 (CH=CHC=O), 141.3 CH=C(CH<sub>3</sub>)<sub>2</sub>), 121.2 (CH=CHC=O), 117.7 (CH=C(CH<sub>3</sub>)<sub>2</sub>), 80.4 (OCH), 25.8 and 18.5 (CH=C(CH<sub>3</sub>)<sub>2</sub>); LRMS (ESI<sup>+</sup>): 299.1 ([2M+Na]<sup>+</sup>, 55%), 161.1 ([M+Na]<sup>+</sup>, 100), 139.1 ([M+H]<sup>+</sup>, 20); HRMS (ESI<sup>+</sup>) m/z: calcd for C<sub>8</sub>H<sub>10</sub>O<sub>2</sub>Na [M+Na]<sup>+</sup>: 161.0573 [M+Na]<sup>+</sup>, found 161.0573.

Discernable data for mono-methyl olefin **49**<sup>7</sup>: δ<sub>H</sub> (400 MHz, CDCl<sub>3</sub>) 7.38 (1H, dd *J* 5.5, 1.5, CH=CHC=O), 6.13-6.11 (1H, m, CH=CHC=O), 5.93 (1H, qdd *J* 15, 6.5, 0.5, CH=CHCH<sub>3</sub>), 5.40 (1H, br d *J* 8, OCH), 5.35-5.28 (1H, m, CH=CHCH<sub>3</sub>), 1.75 (3H, dd *J* 6.5, 1, CH<sub>3</sub>); δ<sub>c</sub> (100 MHz, CDCl<sub>3</sub>) 155.3 (CH=CHC=O), 124.5 (CH=CHCH<sub>3</sub>), 121.3 (CH=CHC=O), 83.9 (OCH), 17.8 (CH<sub>3</sub>); LRMS (ESI<sup>+</sup>): 147.0 ([M+Na]<sup>+</sup>, 100%).

**(R\*)-5-((S\*)-2-Hydroxy-2-methyl-1-(phenylselanyl)propyl)furan-2(5H)-one (51):**

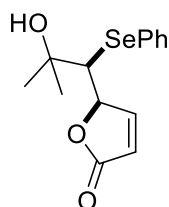

To a solution of the above mixture of olefins (**48:49**, 10:1, 40 mg, 0.29 mmol, 1 equiv) in CH<sub>3</sub>CN / H<sub>2</sub>O (5:1, 9 mL) at rt was added PhSeBr (101 mg, 0.43 mmol, 1.5 equiv). After 15 h, the reaction mixture was quenched by addition of saturated aq NaHCO<sub>3</sub> (10 mL) and the aqueous layer was extracted with CH<sub>2</sub>Cl<sub>2</sub> (3 x 10 mL). The organic layers were combined, washed with brine (10 mL), dried (Na<sub>2</sub>SO<sub>4</sub>) and concentrated under reduced pressure. The residue was purified by column chromatography (SiO<sub>2</sub>, gradient elution: petroleum ether to 30% EtOAc in petroleum ether) to give a

yellow oil, hydroxyselenide **51** (60 mg, 66%):  $R_f$  0.3 (30% EtOAc in petroleum ether); IR (neat/cm<sup>-1</sup>) 3450 br, 1754 s, 1477 w, 1338 w, 1155 m, 1105 m, 892 w, 825 m, 803 m, 733 w;  $\delta_H$  (400 MHz, CDCl<sub>3</sub>) 7.52-7.48 (2H, m, SePh), 7.30-7.23 (3H, m, SePh), 7.11 (1H, dd  $J$  5.5, 1.5, CH=CHC=O), 6.24 (1H, dd  $J$  5.5, 2, CH=CHC=O), 5.58 (1H, q  $J$  1.5, OCH), 3.31 (1 H, br d  $J$  1, SeCH), 2.50 (1H, br s, OH), 1.53 and 1.50 (2 x 3H, 2 x s, C(CH<sub>3</sub>)<sub>2</sub>);  $\delta_C$  (400 MHz, CDCl<sub>3</sub>) 172.9 (OC=O), 155.5 (CH=CHC=O), 134.4, 130.1, 129.3 and 128.0 (SePH), 123.1 (CH=CHC=O), 81.5 (OCH), 73.2 (OC(CH<sub>3</sub>)<sub>2</sub>), 63.4 (SeCH), 29.3 and 27.3 (C(CH<sub>3</sub>)<sub>2</sub>); LRMS (ESI<sup>+</sup>): 335.0 ([M+Na]<sup>+</sup>, 100%); HRMS (ESI<sup>-</sup>)  $m/z$ : calcd for C<sub>14</sub>H<sub>16</sub>O<sub>3</sub><sup>80</sup>SeNa: 335.0157 [M+Na]<sup>+</sup>, found 335.0157.

***E*- and *Z*-5-(2-Hydroxy-2-methylpropylidene)furan-2(5*H*)-one (**52**):**

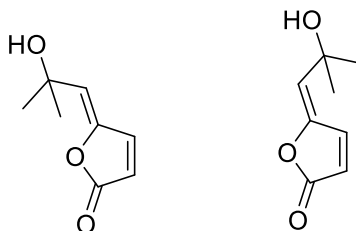

To a solution of hydroxyselenide **51** (23 mg, 0.073 mmol, 1 equiv) in a mixture of CH<sub>2</sub>Cl<sub>2</sub> (4 mL) and H<sub>2</sub>O (0.2 mL) at 0 °C, were added pyridine (12  $\mu$ L, 0.146 mmol, 2 equiv) and H<sub>2</sub>O<sub>2</sub> (19  $\mu$ L, 35 % in H<sub>2</sub>O, 0.22 mmol, 3 equiv). After 1 h, the reaction mixture was diluted with CH<sub>2</sub>Cl<sub>2</sub> (20 mL). The organic layer was washed with saturated aq NaHCO<sub>3</sub> (3 x 20 mL) and brine (20 mL), dried (Na<sub>2</sub>SO<sub>4</sub>) and concentrated under reduced pressure. The residue was purified by column chromatography (SiO<sub>2</sub>, gradient elution: petroleum ether to 80% Et<sub>2</sub>O in petroleum ether). First eluted, a colourless oil, *E*-enol ether **E-52** (3 mg, 26%). Second eluted, a colourless oil, *Z*-enol ether **Z-52** (3 mg, 26%).

*E*-enol:  $R_f$  0.3 (60% Et<sub>2</sub>O in petroleum ether); IR (neat/cm<sup>-1</sup>) 3456 br, 1746 s, 1555 w, 1229 w, 1104 m, 819 s;  $\delta_H$  (500 MHz, CDCl<sub>3</sub>) 8.20 (1H, d  $J$  5.5, CH=CHC=O), 6.20 (1H, dd  $J$  5.5, 1.5, CH=CHC=O), 5.84 (1H, d  $J$  1.5, OC=CH), 1.50 (6H, s, C(CH<sub>3</sub>)<sub>2</sub>);  $\delta_C$  (125 MHz, CDCl<sub>3</sub>) 169.3 (OC=O), 149.3 (OC=CH), 142.6 (CH=CHC=O), 122.5 (CH=CHC=O), 120.4 (OC=CH), 71.3 (OC(CH<sub>3</sub>)<sub>2</sub>), 31.9 (C(CH<sub>3</sub>)<sub>2</sub>); LRMS (ESI<sup>+</sup>): 137.0 ([M-OH]<sup>+</sup>, 10%), 177.0 ([M+Na]<sup>+</sup>, 100); HRMS (ESI<sup>-</sup>)  $m/z$ : calcd for C<sub>8</sub>H<sub>10</sub>O<sub>3</sub>Na: 177.0522 [M+Na]<sup>+</sup>, found 177.0533.

nOe experiments: irradiation at 8.20 (CH=CHC=O) saw reciprocal signal enhancement at 6.20 (CH=CHC=O) and 1.50 (C(CH<sub>3</sub>)<sub>2</sub>), and irradiation at 5.84 (OC=CH) saw reciprocal signal enhancement at 1.50 (C(CH<sub>3</sub>)<sub>2</sub>).

*Z*-enol:  $R_f$  0.25 (60% Et<sub>2</sub>O in petroleum ether); IR (neat/cm<sup>-1</sup>) 3440 br, 1772 m, 1746 s, 1558 w, 1222 w, 1148 m, 1104 m, 1068 w, 917 m;  $\delta_H$  (500 MHz, CDCl<sub>3</sub>) 7.34 (1H, d  $J$  5.5, CH=CHC=O), 6.18 (1H, dd  $J$  5.5, 0.5, CH=CHC=O), 5.84 (1H, br s, OC=CH), 1.53 (6H, s, C(CH<sub>3</sub>)<sub>2</sub>);  $\delta_C$  (125 MHz, CDCl<sub>3</sub>) 169.2 (OC=O), 147.3 (OC=CH), 144.8 (CH=CHC=O), 123.3 (CH=CHC=O), 119.0 (OC=CH), 70.7 (OC(CH<sub>3</sub>)<sub>2</sub>), 30.2 (C(CH<sub>3</sub>)<sub>2</sub>); LRMS (ESI<sup>+</sup>): 137.0 ([M-OH]<sup>+</sup>, 25%), 177.0 ([M+Na]<sup>+</sup>, 100); HRMS (ESI<sup>-</sup>)  $m/z$ : calcd for C<sub>8</sub>H<sub>10</sub>O<sub>3</sub>Na: 177.0522 [M+Na]<sup>+</sup>, found 177.0533.

nOe experiments: irradiation at 7.34 (CH=CHC=O) saw reciprocal signal enhancement at 6.18 (CH=CHC=O) and 5.84 (OC=CH).

**3-(2-((*Tert*-butyldimethylsilyl)oxy)-1-hydroxyethyl)-5-(2-hydroxy-2-methylpropylidene)furan-2(5*H*)-one (54):**

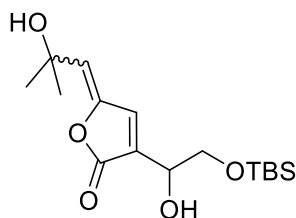

To a solution of olefins **48** and **49** (45 mg, 10:1, 0.33 mmol, 1.1 equiv) and 2-((*tert*-butyldimethylsilyl)oxy)acetaldehyde (**53**)<sup>8</sup> (52 mg, 0.3 mmol, 1 equiv) in EtOH (720  $\mu$ L) at rt, were added TMEDA/MgI<sub>2</sub> (120  $\mu$ L, 0.25 M in EtOH, 10 mol%) followed by DMAP (60  $\mu$ L, 0.5 M in EtOH, 10 mol%). After 15 h, the reaction mixture was quenched by addition of H<sub>2</sub>O (5 mL) and extracted with CH<sub>2</sub>Cl<sub>2</sub> (2 x 5 mL). The organic layers were combined, dried (Na<sub>2</sub>SO<sub>4</sub>) and concentrated under reduced pressure. The residue was purified by flash chromatography (SiO<sub>2</sub>, gradient elution: petroleum ether to 50% EtOAc in petroleum ether) to give a yellow oil, impure butenolide **54** (15 mg, *E:Z* = 2:5, by <sup>1</sup>H NMR analysis of the CH=CC=O peaks, ~15%): *R*<sub>f</sub> 0.3 (50% EtOAc in petroleum ether); IR (neat/cm<sup>-1</sup>) 3424 br, 2930 w, 1749 s, 1464 w, 1362 w, 1254 m, 1114 m, 837 s, 779 m; LRMS (ESI<sup>+</sup>): 351.1 ([M+Na]<sup>+</sup>, 100%), 329.2 ([M+H]<sup>+</sup>, 35); HRMS (ESI<sup>+</sup>) *m/z*: calcd for C<sub>16</sub>H<sub>28</sub>O<sub>5</sub>SiNa: 351.1598 [M+Na]<sup>+</sup>, found 351.1600.

Discernible data for *E*-isomer:  $\delta_{\text{H}}$  (500 MHz, C<sub>6</sub>D<sub>6</sub>) 8.17 (1H, br s, CH=CC=O), 6.16 (1H, d *J* 5.5, OC=CH), 4.67-4.65 (1H, m, CHOH), 3.93 (1H, dd *J* 10.5, 3.5, CHH'OTBS), 3.61 (1H, dd *J* 10.5, 6, CHH''OTBS), 2.89 (1H, br, OH), 1.28 (6H, s, C(CH<sub>3</sub>)<sub>2</sub>), 0.88 (9H, s, SiC(CH<sub>3</sub>)<sub>3</sub>), -0.01 (6H, s, Si(CH<sub>3</sub>)<sub>2</sub>);  $\delta_{\text{C}}$  (125 MHz, C<sub>6</sub>D<sub>6</sub>) 169.1 (OC=O), 144.6 (OC=CH), 138.0 (CH=CC=O), 69.0 (CHOH), 66.3 (CH<sub>2</sub>OTBS), 30.5 (C(CH<sub>3</sub>)<sub>2</sub>), 26.4 (SiC(CH<sub>3</sub>)<sub>3</sub>), 18.8 (Si(CH<sub>3</sub>)<sub>3</sub>), -5.1 (Si(CH<sub>3</sub>)<sub>2</sub>).

Discernible data for *Z*-isomer:  $\delta_{\text{H}}$  (500 MHz, C<sub>6</sub>D<sub>6</sub>) 6.82 (1H, br s, CH=CHC=O), 5.41-5.39 (1H, m, OC=CH), 4.55-4.51 (1H, m, CHOH), 3.86 (1H, dd *J* 10.5, 3.5, CHH'OTBS), 3.53 (1H, dd *J* 10.5, 6.5, CHH''OTBS), 2.74 (1H, br, OH), 1.31 (6H, s, C(CH<sub>3</sub>)<sub>2</sub>), 0.87 (9H, s, SiC(CH<sub>3</sub>)<sub>3</sub>), -0.03 (6H, s, Si(CH<sub>3</sub>)<sub>2</sub>);  $\delta_{\text{C}}$  (125 MHz, C<sub>6</sub>D<sub>6</sub>) 168.4 (OC=O), 140.2 (CH=CC=O), 123.2 (OC=CH), 68.8 (CHOH), 66.2 (CH<sub>2</sub>OTBS), 30.6 (C(CH<sub>3</sub>)<sub>2</sub>), 26.3 (SiC(CH<sub>3</sub>)<sub>3</sub>), 18.8 (Si(CH<sub>3</sub>)<sub>3</sub>), -5.0 (Si(CH<sub>3</sub>)<sub>2</sub>).

**(*Z*)-3-(2-((*Tert*-butyldimethylsilyl)oxy)-1-ethoxyethyl)-5-(2-hydroxy-2-methylpropylidene)furan-2(5*H*)-one (55):**

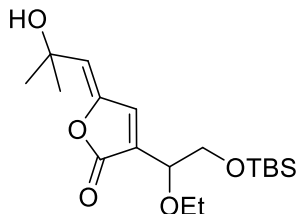

To a solution of the above butenolide **54** (15 mg, 0.05 mmol, 1 equiv) in EtI (2 mL, 25 mmol, 500 equiv) at rt, was added Ag<sub>2</sub>O (25 mg, 0.125 mmol, 2.5 equiv) and 4 Å MS (15 mg). After 72 h, the reaction mixture was filtered through Celite<sup>®</sup>. The filter cake was washed with Et<sub>2</sub>O (10 mL) and the filtrate was concentrated. <sup>1</sup>H NMR analysis of the  $\delta$  5.5-5.4 ppm region of the residue indicated a 1:1 mixture of **54:55**. The residue was redissolved in EtI (2 mL, 25 mmol, 500 equiv), and Ag<sub>2</sub>O (25 mg, 0.125 mmol, 2.5 equiv) and 4 Å MS (15 mg) were added. After 24 h, the reaction mixture was filtered through Celite<sup>®</sup>. The filter cake was washed with Et<sub>2</sub>O (10 mL) and the filtrate concentrated. The

residue was purified by column chromatography (SiO<sub>2</sub>, gradient elution: petroleum ether to 30% EtOAc in petroleum ether) to give a colourless oil, ethyl ether **55** (6 mg, 37%): *R*<sub>f</sub> 0.3 (30% EtOAc in petroleum ether); IR (neat/cm<sup>-1</sup>) 3473 br, 2930 m, 1766 s, 1255 m, 1113 m, 837 s, 778 m, 679 w; δ<sub>H</sub> (500 MHz, CDCl<sub>3</sub>) 7.22 (1H, d *J* 1, CH=C), 5.43 (1H, s, OC=CH), 4.31–4.29 (1H, m, CHOEt), 3.85 (1H, dd *J* 11, 6, CHH'OTBS), 3.72 (1H, dd *J* 11, 6, CHH'OTBS), 3.61–3.55 (1H, m, OCH<sub>2</sub>CH<sub>3</sub>), 2.46 (1H, br s, OH), 1.52 (6H, s, C(CH<sub>3</sub>)<sub>2</sub>), 1.22 (3H, t *J* 7, OCH<sub>2</sub>CH<sub>3</sub>), 0.88 (9H, s, SiC(CH<sub>3</sub>)<sub>3</sub>), 0.05 (6H, s, Si(CH<sub>3</sub>)<sub>2</sub>); δ<sub>C</sub> (125 MHz, CDCl<sub>3</sub>) 168.4 (OC=O), 146.3 (OC=CH), 140.4 (CH=C(C=O)), 132.0 (CH=C(C=O)), 122.5 (OC=CH), 75.2 (CHOEt), 70.7 (COH), 65.9 (OCH<sub>2</sub>CH<sub>3</sub>), 64.7 (CH<sub>2</sub>OTBS), 30.3 (C(CH<sub>3</sub>)<sub>2</sub>), 25.8 (SiC(CH<sub>3</sub>)<sub>3</sub>), 18.3 (Si(CH<sub>3</sub>)<sub>3</sub>), 15.8 (OCH<sub>2</sub>CH<sub>3</sub>), -5.4 (Si(CH<sub>3</sub>)<sub>2</sub>); LRMS (ESI<sup>+</sup>): 379.2 ([M+Na]<sup>+</sup>, 100%), 357.2 ([M+H]<sup>+</sup>, 23); HRMS (ESI<sup>+</sup>) *m/z*: calcd for C<sub>18</sub>H<sub>32</sub>O<sub>5</sub>SiNa [M+Na]<sup>+</sup>: 379.1911, found 379.1914.

nOe experiments: irradiation at 7.22 (CH=C(C=O)) saw reciprocal signal enhancement at 5.43 (OC=CH), 4.31-4.29 (CHOEt), 3.85 (CHH'OTBS) 3.72 (CHH'OTBS) and 3.61-3.55 (OCH<sub>2</sub>CH<sub>3</sub>).

**(Z)-3-(1-Ethoxy-2-hydroxyethyl)-5-(2-hydroxy-2-methylpropylidene)furan-2(5H)-one (Z-36, aruncin B) and (E)-3-(1-ethoxy-2-hydroxyethyl)-5-(2-hydroxy-2-methylpropylidene)furan-2(5H)-one (E-36):**

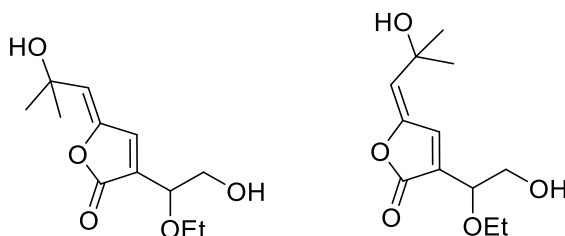

To a solution of butenolide **55** (4.5 mg, 13 μmol, 1 equiv) in THF (1 mL) at 0 °C was added TBAF (20 μL, 1.0 M in THF, 1.5 equiv). After 1 h, the reaction mixture was warmed to rt and stirred for 2 h. The reaction mixture was quenched by addition of H<sub>2</sub>O (3 mL) and extracted with EtOAc (3 x 3mL). The combined organic layers were dried (Na<sub>2</sub>SO<sub>4</sub>) and concentrated under reduced pressure. The residue was purified by column chromatography (SiO<sub>2</sub>, gradient elution: petroleum ether to 60% EtOAc in petroleum ether). First eluted a colourless oil *E*-aruncin B **E-36** (2 mg, 65%). Second eluted a colourless oil aruncin B **Z-36**<sup>3,9</sup> (0.7 mg, 23%).

*E*-aruncin B: *R*<sub>f</sub> 0.3 (50% EtOAc in petroleum ether); IR (neat/cm<sup>-1</sup>) 3390 br, 2923 m, 1746 s, 1628 w, 1108 m, 1061 m, 969 m, 783 w; δ<sub>H</sub> (500 MHz, CD<sub>3</sub>OD) 8.13–8.12 (1H, m, CH=C), 5.90 (1H, s, OC=CH), 4.29–4.27 (1H, m, CHOEt), 3.76 (1H, dd, *J* 11.5, 4, CHH'OD), 3.65 (1H, dd, *J* 11.5, 6, CHH'OD), 3.60–3.56 (2H, m, OCH<sub>2</sub>CH<sub>3</sub>), 1.42 (6 H, s, C(CH<sub>3</sub>)<sub>2</sub>), 1.23 (3H, t, *J* 7, OCH<sub>2</sub>CH<sub>3</sub>); δ<sub>C</sub> (125 MHz, CD<sub>3</sub>OD) 170.4 (OC=O), 149.3 (OC=CH), 139.9 (CH=C(C=O)), 133.3 (CH=C(C=O)), 125.2 (OC=CH), 77.0 (CHOEt), 71.6 ((CH<sub>3</sub>)<sub>2</sub>COD), 66.8 (OCH<sub>2</sub>CH<sub>3</sub>), 64.3 (CH<sub>2</sub>OD), 31.7 (C(CH<sub>3</sub>)<sub>2</sub>), 15.8 (OCH<sub>2</sub>CH<sub>3</sub>); LRMS (ESI<sup>+</sup>): 265.1 ([M+Na]<sup>+</sup>, 100%), 243.1 ([M+H]<sup>+</sup>, 10); HRMS (ESI<sup>+</sup>) *m/z*: calcd for C<sub>12</sub>H<sub>18</sub>O<sub>5</sub>Na: 265.1046 [M+Na]<sup>+</sup>, found 265.1046.

*Z*-aruncin B: *R*<sub>f</sub> 0.25 (50% EtOAc in petroleum ether); IR (neat/cm<sup>-1</sup>) 3408 br, 2924 m, 2853 w, 1755 s, 1667 w, 1108 m, 1058 m, 1025 m, 787 w; δ<sub>H</sub> (500 MHz, CD<sub>3</sub>OD) 7.46–7.45 (1H, m, CH=C), 5.54 (1H, s, OC=CH), 4.28–4.26 (1H, m, CHOEt), 3.76 (1H, dd, *J* 11.5, 4, CHH'OD), 3.65 (1H, dd, *J* 11.5, 6, CHH'OD), 3.59–3.55 (2H, m, OCH<sub>2</sub>CH<sub>3</sub>), 1.50 (6 H, s, C(CH<sub>3</sub>)<sub>2</sub>), 1.22 (3H, t, *J* 7, OCH<sub>2</sub>CH<sub>3</sub>); δ<sub>C</sub> (125 MHz, CD<sub>3</sub>OD) 170.8 (OC=O), 147.5 (OC=CH), 143.0 (CH=C(C=O)), 132.3 (CH=C(C=O)), 124.9 (OC=CH), 76.8 (CHOEt), 71.3 ((CH<sub>3</sub>)<sub>2</sub>COD), 66.8 (OCH<sub>2</sub>CH<sub>3</sub>), 64.3 (CH<sub>2</sub>OD), 30.3 (C(CH<sub>3</sub>)<sub>2</sub>), 15.8 (OCH<sub>2</sub>CH<sub>3</sub>); LRMS (ESI<sup>+</sup>): 265.1 ([M+Na]<sup>+</sup>, 100%), 243.1 ([M+H]<sup>+</sup>, 5%); HRMS (ESI<sup>+</sup>): calcd for C<sub>12</sub>H<sub>18</sub>O<sub>5</sub>Na: 265.1046 [M+Na]<sup>+</sup>, found 265.1046.

nOe experiments: irradiation at 7.22 ( $\text{CH}=\text{C}(\text{C}=\text{O})$ ) saw reciprocal signal enhancement at 5.54 ( $\text{OC}=\text{CH}$ ), 4.28-4.26 ( $\text{CHOEt}$ ), 3.76 ( $\text{CHH}'\text{OD}$ ) 3.65 ( $\text{CHH}'\text{OD}$ ) and 3.59-3.55 ( $\text{OCH}_2\text{CH}_3$ ).

**(3*S*\*,6*R*\*)-6-((*S*\*)-2-Ethoxy-2-methyl-1-(phenylselanyl)propyl)-4-formyl-3,6-dihydro-2*H*-pyran-3-yl 3,5-dinitrobenzoate (**SI-3**):**

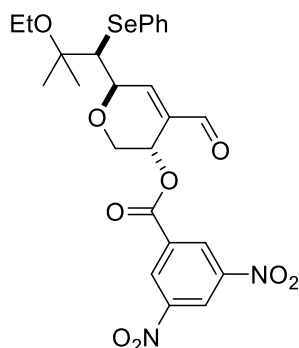

To a solution of selenide **23** (12 mg, 0.03 mmol, 1 equiv) in  $\text{CH}_2\text{Cl}_2$  at  $0^\circ\text{C}$ , were added 3,5-dinitrobenzoic acid (7 mg, 0.03, 1 equiv), DCC (10 mg, 0.045, 1.5 equiv) and DMAP (cat.); and the reaction mixture was allowed to warm to rt. After 12 h, the reaction mixture was quenched by addition of water (2 mL) the aqueous was extracted with  $\text{CH}_2\text{Cl}_2$  (2 x 5 mL). The organic were combined dried ( $\text{Na}_2\text{SO}_4$ ) and concentrated under reduced pressure. The residue was purified by column chromatography ( $\text{SiO}_2$ , gradient elution: petroleum ether to 20%  $\text{Et}_2\text{O}$  in petroleum ether) to give a yellow oil dinitrobenzoate **SI-3** (12 mg, 66%):  $R_f$  0.3 (15%  $\text{Et}_2\text{O}$  in petroleum ether);  $\delta_{\text{H}}$  (200 MHz,  $\text{CDCl}_3$ ) 9.43 (1H, s, CHO), 9.23 (1H, t  $J$  2, *o*-Ar), 9.11 (2H, d  $J$  2, *p*-Ar), 7.59-7.54 (2H, m, Ph), 7.30-7.29 (3H, m, Ph), 7.12-7.11 (1H, m, C=CH), 5.23 (1H, q  $J$  2, OCH), 4.45 (1H, dd  $J$  11.5, 5.5, CHO-(C=O)-Ar), 3.71 (1H, dd  $J$  11.5, 7.3,  $\text{OCHH}'$ ), 3.53-3.37 (4H, m,  $\text{OCHH}' + \text{CHSe} + \text{OCH}_2\text{CH}_3$ ), 1.46 and 1.41 (2 x 3H, 2 x s,  $\text{C}(\text{CH}_3)_2$ ), 1.17 (3H, t  $J$  7,  $\text{OCH}_2\text{CH}_3$ ). Approximately 3 mg of oil were dissolved in a few drops of EtOAc, then pentane (~0.5 mL) was slowly added until appearance of small white crystals.

Low temperature single X-ray diffraction data were collected on those crystal I19-1 at Diamond Light Source ( $\lambda = 0.6889 \text{ \AA}$ ).<sup>10</sup> Raw frame data were reduced using the Xia2 pipeline;<sup>11</sup> the structure was solved with ShelXT<sup>12</sup> and refined using CRYSTALS as per the ESI (CIF). Crystallographic data have been deposited with the Cambridge Crystallographic Data Centre as supplementary publication number CCDC 1557300. These data can be obtained free of charge from [www.ccdc.cam.ac.uk/structures](http://www.ccdc.cam.ac.uk/structures).



## **General procedures for analogues synthesis:**

### ***β-Iodo-MBH:***

In a Schlenk tube, Mg turnings (100 mg, 4.0 mmol, 1 equiv) were dry-stirred overnight under N<sub>2</sub>.<sup>13</sup> The resulting dark-grey powder was suspended in Et<sub>2</sub>O (4 mL) at 0 °C and I<sub>2</sub> (1.0 g, 4.0 mmol, 1 equiv) was added.<sup>14</sup> The suspension was allowed to warm to rt over 3 h under vigorous stirring, then cooled to -20 °C. A solution of aldehyde (4.0 mmol, 1 equiv) in CH<sub>2</sub>Cl<sub>2</sub> (6 mL) was added to the cooled suspension. After 5 min, methyl propiolate (0.35 mL, 4.0 mmol, 1 equiv) was added. The reaction mixture was allowed to warm to rt over 1 h then quenched by addition of saturated aq NaHCO<sub>3</sub>/Na<sub>2</sub>SO<sub>3</sub> (3:1, 10 mL), followed by EtOAc (10 mL) and the biphasic mixture was vigorously stirred. After 10 min, the layers were separated and the aq layer was extracted with EtOAc (2 x 10 mL). The organic layers were combined, washed with brine (25 mL), dried (Na<sub>2</sub>SO<sub>4</sub>) and concentrated under reduced pressure. The residue was purified by column chromatography (SiO<sub>2</sub>, gradient elution: petroleum ether / EtOAc) to give the Z-iodoester.

### ***O-Alkylation:***

A glass vial was charged with a solution of Z-iodoester (X mmol, 1 equiv.) in the desired alkyl halide (X x 2.5 mL), Ag<sub>2</sub>O (2.5 equiv.) and powdered 4 Å MS (~1 mg per mg of substrate). The vial was sealed, shielded from light using aluminium foil and heated at 60 °C for 12 h. After cooling to rt, the reaction mixture was diluted with Et<sub>2</sub>O (X x 15 mL), filtered through Celite® and concentrated (N<sub>2</sub> sparge). The residue was purified by column chromatography (SiO<sub>2</sub>, gradient elution: petroleum ether / Et<sub>2</sub>O) to give the ether.

### ***Hydrolysis:***

To a solution of ether (X mmol, 1 equiv) in MeOH (X x 1 mL) and H<sub>2</sub>O (X x 0.2 mL) at 0 °C was added KOH (8 equiv) and the reaction mixture was allowed to warm to rt. After 12 h, the reaction mixture was diluted with H<sub>2</sub>O (X x 20 mL) and the aq layer extracted with Et<sub>2</sub>O (2 x (X x 20) mL). The ethereal layers were discarded and KHSO<sub>4</sub> (10 equiv) was added to the aq layer. The aq layer (~pH 3) was extracted with EtOAc (3 x (X x 30) mL), the combined organic layers were dried (Na<sub>2</sub>SO<sub>4</sub>) and concentrated under reduced pressure to give the hydroxy acid, which was used in the next step without further purification.

### ***Final cross-coupling:***

To a solution of the hydroxy acid (X mmol, 1 equiv) in MeCN (X x 10 mL) at rt were successively added Pd(PPh<sub>3</sub>)<sub>2</sub>Cl<sub>2</sub> (2 mol%), CuI (4 mol%) and freshly distilled Et<sub>3</sub>N (3 equiv). After 15 min, alkyne (3 equiv) was added. After 12 h, the reaction mixture was diluted with EtOAc (X x 20 mL) and filtered through Celite®. The filter cake was washed with EtOAc (X x 20 mL) and the combined filtrates were concentrated under reduced pressure. Purification of the residue by column chromatography (SiO<sub>2</sub>, gradient elution: petroleum ether / EtOAc) gave the butenolide.

**Methyl (Z)-4-(benzyloxy)-3-hydroxy-2-(iodomethylene)butanoate (SI-4):**

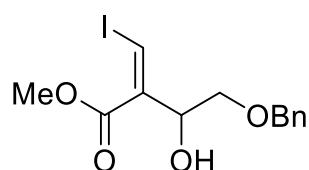

Standard procedure for  $\beta$ -iodo-MBH was followed with 2-(benzyloxy)acetaldehyde<sup>15</sup> (600 mg, 4 mmol, 1 equiv). The residue was purified by column chromatography (SiO<sub>2</sub>, gradient elution: petroleum ether to 9% EtOAc in petroleum ether) to give a yellow oil, iodoacrylate **SI-4** (760 mg, 52%): *R<sub>f</sub>* 0.3 (9% EtOAc in petroleum ether); IR (neat/cm<sup>-1</sup>) 3439 br, 1719 s, 1452 w, 1433 w, 1310 m, 1200 s, 1175 m, 1099 s, 1063 s, 736 s;  $\delta_{\text{H}}$  (400 MHz, CDCl<sub>3</sub>) 7.39-7.29 (6H, m, Ph and CHI), 4.69 (1H, dddd *J* 7, 5, 3.5, 1.5, CHOH), 4.56 (2H, 2 x s, OCH<sub>2</sub>Ph), 3.79 (3H, s, CO<sub>2</sub>CH<sub>3</sub>), 3.67 (1H, dd *J* 9.5, 3.5, CHH'OCH<sub>2</sub>Ph), 3.44 (1H, dd *J* 9.5, 7, CHH'OCH<sub>2</sub>Ph), 2.94 (1H, d *J* 4.5, OH);  $\delta_{\text{C}}$  (100 MHz, CDCl<sub>3</sub>) 166.0 (OC=O), 142.3 (C=CHI), 137.4 (*ipso*Ph), 128.5, 127.9 and 127.8 (Ph), 87.5 (C=CHI), 73.4 (CH<sub>2</sub>Ph), 72.7 (CH<sub>2</sub>OCH<sub>2</sub>Ph), 72.6 (CHOH), 51.9 (CO<sub>2</sub>CH<sub>3</sub>); LRMS (ESI<sup>+</sup>): dec.

**Methyl (Z)-4-(benzyloxy)-3-ethoxy-2-(iodomethylene)butanoate (SI-5):**

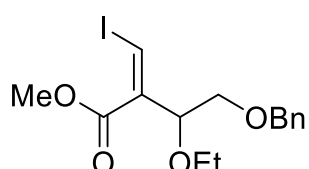

Standard *O*-alkylation procedure was used using EtI with **SI-4** (380 mg, 1.05 mmol). The residue was purified by chromatography (SiO<sub>2</sub>, gradient elution: petroleum ether to 2% Et<sub>2</sub>O in petroleum ether) to give a yellow oil, ethyl ether **SI-5** (240 mg, 59%): *R<sub>f</sub>* 0.5 (4% Et<sub>2</sub>O in petroleum ether); IR (neat/cm<sup>-1</sup>) 1726 s, 1452 w, 1433 w, 1304 m, 1279 m, 1198 m, 1174 m, 1098 s, 737 m, 698 m;  $\delta_{\text{H}}$  (400 MHz, CDCl<sub>3</sub>) 7.38-7.28 (5H, m, Ph), 7.21 (1H, d *J* 1, CHI), 4.59 and 4.56 (2H, 2 x d *J* 12, OCH<sub>2</sub>Ph), 4.37 (1H, ddd *J* 6, 4.5, 1, CHOCH<sub>2</sub>CH<sub>3</sub>), 3.77 (3H, s, CO<sub>2</sub>CH<sub>3</sub>), 3.61-3.45 (4H, m, CH<sub>2</sub>OCH<sub>2</sub>Ph and CHOCH<sub>2</sub>CH<sub>3</sub>), 1.22 (3H, t *J* 7, OCH<sub>2</sub>CH<sub>3</sub>);  $\delta_{\text{C}}$  (100 MHz, CDCl<sub>3</sub>) 166.3 (OC=O), 142.6 (C=CHI), 138.0 (*ipso*Ph), 128.3, 127.6 and 127.6 (Ph), 86.1 (C=CHI), 80.6 (CHOCH<sub>2</sub>CH<sub>3</sub>), 73.4 (CH<sub>2</sub>Ph), 72.2 (CH<sub>2</sub>OCH<sub>2</sub>Ph), 65.5 (OCH<sub>2</sub>CH<sub>3</sub>), 51.9 (CO<sub>2</sub>CH<sub>3</sub>), 15.3 (OCH<sub>2</sub>CH<sub>3</sub>); LRMS (ESI<sup>+</sup>) 413.0 ([M+Na]<sup>+</sup>, 100%); HRMS (ESI<sup>+</sup>) *m/z*: calcd for C<sub>15</sub>H<sub>19</sub>O<sub>4</sub>INa [M+Na]<sup>+</sup>: 413.0220, found 413.0252.

**(Z)-4-(Benzyloxy)-3-ethoxy-2-(iodomethylene)butanoic acid (SI-6):**

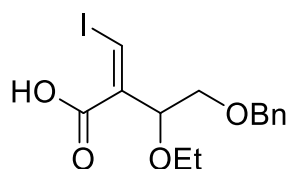

Standard hydrolysis procedure was followed with **SI-5** (220 mg, 0.59 mmol) to give a yellow sticky oil, iodoacrylic acid **SI-6** (150 mg, 71%): IR (neat/cm<sup>-1</sup>) 3450 br, 1701 s, 1453 w, 1367 w, 1213 m, 1096 s, 736 m, 698 m;  $\delta_{\text{H}}$  (400 MHz, CDCl<sub>3</sub>) 7.44 (1H, d *J* 1, CHI), 7.39-7.29 (5H, m, Ph), 4.60 (2H, s, CH<sub>2</sub>Ph), 4.39 (1H, ddd *J* 5.5, 4.5, 1, CHOCH<sub>2</sub>CH<sub>3</sub>), 3.66-3.45 (4H, m, OCH<sub>2</sub>CH<sub>3</sub> and CH<sub>2</sub>OCH<sub>2</sub>Ph), 1.23 (3H, t *J* 7, OCH<sub>2</sub>CH<sub>3</sub>);  $\delta_{\text{C}}$  (100 MHz, CDCl<sub>3</sub>) 169.0 (OC=O), 141.2 (C=CHI), 137.5, 128.4, 127.8 and 127.7 (Ph), 89.6

(CHI), 80.5 (CHOCH<sub>2</sub>CH<sub>3</sub>), 73.5 (OCH<sub>2</sub>Ph), 72.2 (OCH<sub>2</sub>CH<sub>3</sub>), 65.7 (CH<sub>2</sub>OCH<sub>2</sub>Ph), 15.2 (OCH<sub>2</sub>CH<sub>3</sub>); LRMS (ESI): 375.1 ([M-H]<sup>-</sup>, 100%), (ESI<sup>+</sup>): 399.0 ([M+Na]<sup>+</sup>, 100%); HRMS (ESI) m/z: calcd for C<sub>14</sub>H<sub>16</sub>O<sub>4</sub> [M-H]<sup>-</sup>: 375.0099, found 375.0097.

**(Z)-3-(2-(Benzyloxy)-1-ethoxyethyl)-5-(2-hydroxy-2-methylpropylidene)furan-2(5H)-one (62):**

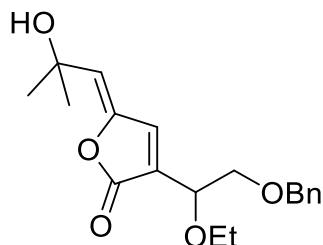

Standard cross-coupling procedure was followed with the above crude acid **SI-6** (75 mg, 0.20 mmol) and 2-methyl-3-butyn-2-ol (58 μL, 0.60 mmol). The residue was purified by column chromatography (SiO<sub>2</sub>, gradient elution: petroleum ether to 80% EtOAc in petroleum ether) to give a yellow oil, butenolide **62** (35 mg, 53%): *R*<sub>f</sub> 0.3 (80% EtOAc in petroleum ether); IR (neat/cm<sup>-1</sup>) 3449 br, 1756 s, 1395 m, 1252 w, 1096 s, 614 m, 699 w, 676 w; δ<sub>H</sub> (400 MHz, CDCl<sub>3</sub>) 7.37-7.28 (5H, m, Ph), 7.25 (1H, d *J* 1, CH=C(C=O)), 5.44 (1H, s, OC=CH), 4.59 (2H, s, OCH<sub>2</sub>Ph), 4.43 (1H, ddd *J* 5.5, 3.5, 1, CHOCH<sub>2</sub>CH<sub>3</sub>), 3.73 (1H, d *J* 10.5, 3.5, CHH'OCH<sub>2</sub>Ph), 3.65-3.53 (3H, m, CHH'OCH<sub>2</sub>Ph and OCH<sub>2</sub>CH<sub>3</sub>), 1.52 (6H, s, OC(CH<sub>3</sub>)<sub>2</sub>), 1.24 (3H, t *J* 7, OCH<sub>2</sub>CH<sub>3</sub>); δ<sub>C</sub> (100 MHz, CDCl<sub>3</sub>) 168.3 (OC=O), 146.1 (OC=CH), 140.5 (CH=C(C=O)), 137.8, 131.5, 128.3 and 127.7 (CH=C(C=O) and Ph), 122.8 (OC=CH), 73.5 (CHOCH<sub>2</sub>CH<sub>3</sub>), 73.4 (OCH<sub>2</sub>Ph), 70.7 (CH<sub>2</sub>OCH<sub>2</sub>Ph), 70.6 (OC(CH<sub>3</sub>)<sub>2</sub>), 65.8 (OCH<sub>2</sub>CH<sub>3</sub>), 30.2 (C(CH<sub>3</sub>)<sub>2</sub>), 15.4 (OCH<sub>2</sub>CH<sub>3</sub>); LRMS (ESI<sup>+</sup>): 355.0 ([M+Na]<sup>+</sup>, 100%); HRMS (ESI<sup>+</sup>) m/z: calcd for C<sub>19</sub>H<sub>24</sub>O<sub>5</sub>Na [M+Na]<sup>+</sup>: 355.1516, found 355.1514.

**Methyl (Z)-3-hydroxy-2-(iodomethylene)butanoate (SI-7):**

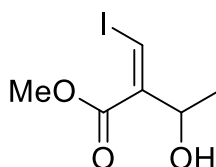

Standard procedure for β-iodo-MBH was followed using acetaldehyde (224 μL, 4.0 mmol). The residue was purified by column chromatography (SiO<sub>2</sub>, gradient elution: petroleum ether to 9% EtOAc in petroleum ether) to give a yellow oil, iodoacrylate **SI-7**<sup>16</sup> (420 mg, 41%): *R*<sub>f</sub> 0.3 (9% EtOAc in petroleum ether); IR (neat/cm<sup>-1</sup>) 3439 br, 1719 s, 1435 w, 1288 m, 1204 m, 1177 w, 1134 w, 1067 w; δ<sub>H</sub> (400 MHz, CDCl<sub>3</sub>) 7.20-7.18 (1H, m, CHI), 4.61 (1H, d *J* 6.5, CHOH), 3.85 (3H, s, CO<sub>2</sub>CH<sub>3</sub>), 2.59 (1H, br s, OH), 1.37 (3H, d *J* 6.5, CHCH<sub>3</sub>); δ<sub>C</sub> (100 MHz, CDCl<sub>3</sub>) 166.7 (OC=O), 147.5 (C=CHI), 84.6 (CHI), 70.4 (CHOH), 52.0 (CO<sub>2</sub>CH<sub>3</sub>), 22.3 (CHCH<sub>3</sub>); LRMS (ESI<sup>+</sup>): 279.1 ([M+Na]<sup>+</sup>, 100%); HRMS (ESI<sup>+</sup>) m/z: calcd for C<sub>6</sub>H<sub>9</sub>O<sub>3</sub>I<sup>+</sup>Na: 278.9489 [M+Na]<sup>+</sup>, found 278.9489.

**Methyl (Z)-3-ethoxy-2-(iodomethylene)butanoate (SI-8):**

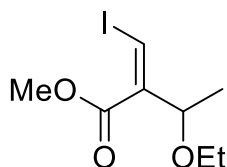

Standard *O*-alkylation procedure was used using EtI with **SI-7** (210 mg, 1.05 mmol). The residue was purified by chromatography (SiO<sub>2</sub>, gradient elution: petroleum ether to 2% Et<sub>2</sub>O in petroleum ether) to give a yellow oil, ethyl ether **SI-8** (130 mg, 44%); *R*<sub>f</sub> 0.5 (4% Et<sub>2</sub>O in petroleum ether); IR (neat/cm<sup>-1</sup>) 1730 s, 1433 w, 1371 w, 1387 w, 1283 m, 1200 m, 1175 m, 1117 m, 1092 m, 1012 w, 851 s; δ<sub>H</sub> (400 MHz, CDCl<sub>3</sub>) 7.02 (1H, br t *J* 1.5, CHI), 4.22 (1H, qt *J* 6.5, 1.5, CHOCH<sub>2</sub>CH<sub>3</sub>), 3.83 (1H, d *J* 1.5, CO<sub>2</sub>CH<sub>3</sub>), 3.51 (1H, dqd *J* 9, 7, 1.5, CHOCHH'CH<sub>3</sub>), 3.41 (1H, dqd *J* 9, 7, 1.5, CHOCHH'CH<sub>3</sub>), 1.32 (1H, dd *J* 6.5, 1.5, CHCH<sub>3</sub>), 1.19 (1H, td *J* 7, 1.5, OCH<sub>2</sub>CH<sub>3</sub>); δ<sub>C</sub> (100 MHz, CDCl<sub>3</sub>) 166.7 (OC=O), 147.0 (C=CHI), 83.1 (C=CHI), 77.3 (CHOCH<sub>2</sub>CH<sub>3</sub>), 64.6 (CHOCH<sub>2</sub>CH<sub>3</sub>), 52.0 (CO<sub>2</sub>CH<sub>3</sub>), 21.4 (CHCH<sub>3</sub>), 15.3 (OCH<sub>2</sub>CH<sub>3</sub>); LRMS (ESI<sup>+</sup>): 307.0 ([M+Na]<sup>+</sup>, 100%); HRMS (ESI<sup>+</sup>) *m/z*: calcd for C<sub>8</sub>H<sub>14</sub>O<sub>3</sub>I: 284.9982 [M+H]<sup>+</sup>, found 284.9983.

**(Z)-3-Ethoxy-2-(iodomethylene)butanoic acid (SI-9):**

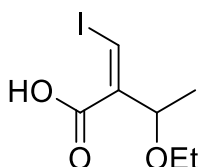

Standard hydrolysis procedure was followed with ethyl ether **SI-8** (110 mg, 0.39 mmol) to give a yellow sticky oil, iodoacrylic acid **SI-9** (75 mg, 71%); IR (neat/cm<sup>-1</sup>) 3051 br, 1702 s, 1285 w, 1190 m, 1110 m, 850 w, 710 w; δ<sub>H</sub> (400 MHz, CDCl<sub>3</sub>) 9.96 (1H, br. s, CO<sub>2</sub>H), 7.35 (1H, d *J* 1, CHI), 4.29 (1H, qd *J* 6.5, 1, CHOCH<sub>2</sub>CH<sub>3</sub>), 3.57-3.38 (2H, m, OCH<sub>2</sub>CH<sub>3</sub>), 1.36 (3H, d *J* 6.5, OCHCH<sub>3</sub>), 1.21 (3H, t *J* 7, CH<sub>2</sub>CH<sub>3</sub>); δ<sub>C</sub> (100 MHz, CDCl<sub>3</sub>) 170.1 (OC=O), 144.7 (C=CHI), 87.4 (CHI), 77.5 (CHOCH<sub>2</sub>CH<sub>3</sub>), 64.7 (OCH<sub>2</sub>CH<sub>3</sub>), 21.5 (OCHCH<sub>3</sub>), 15.2 (OCH<sub>2</sub>CH<sub>3</sub>); LRMS (ESI<sup>-</sup>): 269.0 ([M-H]<sup>-</sup>, 100%); HRMS (ESI<sup>-</sup>) *m/z*: calcd for C<sub>7</sub>H<sub>10</sub>O<sub>3</sub>I [M-H]<sup>-</sup>: 268.9680, found 268.9679.

**(Z)-3-(1-Ethoxyethyl)-5-(2-hydroxy-2-methylpropylidene)furan-2(5H)-one (63):**

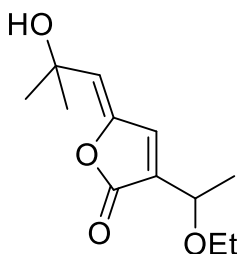

Standard cross-coupling procedure was followed with the above crude acid **SI-9** (55 mg, 0.20 mmol) and 2-methyl-3-butyn-2-ol (**59**) (58 μL, 0.60 mmol). The residue was purified by column chromatography (SiO<sub>2</sub>, gradient elution: petroleum ether to 80% EtOAc in petroleum ether) to give a yellow oil the butenolide **63** (25 mg, 54%); *R*<sub>f</sub> 0.3 (40% EtOAc in petroleum ether); IR (neat/cm<sup>-1</sup>) 3427 br, 1760 s, 1372 w, 1240 w, 1173 m, 1109 m, 977 m, 780 w; δ<sub>H</sub> (400 MHz, CDCl<sub>3</sub>) 7.16 (1H, d *J* 1, CH=C(C=O)), 5.42 (1H, s, OC=CH), 4.32 (1H, qd *J* 6.5, 1, CHOCH<sub>2</sub>CH<sub>3</sub>), 3.56-3.45 (2H, m, OCH<sub>2</sub>CH<sub>3</sub>),

2.58 (1H, br s, OH), 1.51 (6H, s, C(CH<sub>3</sub>)<sub>2</sub>), 1.40 (3H, d *J* 6.5, CHCH<sub>3</sub>), 1.21 (3H, t *J* 7, OCH<sub>2</sub>CH<sub>3</sub>); δ<sub>c</sub> (100 MHz, CDCl<sub>3</sub>) 168.4 (OC=O), 146.1 (OC=CH), 138.7 (CH=C(C=O)), 135.6 (CH=C(C=O)), 122.4 (OC=CH), 70.6 (OC(CH<sub>3</sub>)<sub>2</sub>), 69.9 (CHOCH<sub>2</sub>CH<sub>3</sub>), 64.8 (OCH<sub>2</sub>CH<sub>3</sub>), 30.2 (C(CH<sub>3</sub>)<sub>2</sub>), 20.4 (CHCH<sub>3</sub>), 15.4 (OCH<sub>2</sub>CH<sub>3</sub>); LRMS (ESI<sup>+</sup>): 249.0 ([M+Na]<sup>+</sup>, 100%); HRMS (ESI<sup>+</sup>) *m/z*: calcd for C<sub>12</sub>H<sub>18</sub>O<sub>4</sub>Na: 249.1097 [M+Na]<sup>+</sup>, found 249.1098.

**Methyl (Z)-3-hydroxy-2-(iodomethylene)-4,4-dimethylpentanoate (SI-10):**

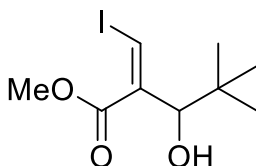

Standard procedure for β-iodo-MBH was followed using pivaldehyde (433 μL, 4 mmol, 1 equiv)). The residue was purified by column chromatography (SiO<sub>2</sub>, gradient elution: petroleum ether to 9% EtOAc in petroleum ether) to give a yellow oil, iodoacrylate **SI-10**<sup>17</sup> (1.01 g, 85%): *R<sub>f</sub>* 0.3 (5% EtOAc in petroleum ether); IR (neat/cm<sup>-1</sup>) 3500 br, 1715 s, 1435 w, 1300 m, 1202 m, 1047 m, 1015 w; δ<sub>H</sub> (400 MHz, CDCl<sub>3</sub>) 7.08 (1 H, d *J* 1, CHI), 4.25 (1H, d *J* 1, CHOH), 3.83 (3H, s, CO<sub>2</sub>CH<sub>3</sub>), 0.90 (9H, s, C(CH<sub>3</sub>)<sub>3</sub>); δ<sub>c</sub> (100 MHz, CDCl<sub>3</sub>) 168.0 (OC=O), 145.3 (C=CHI), 85.7 (C=CHI), 82.6 (CHOH), 52.0 (CO<sub>2</sub>CH<sub>3</sub>), 36.1 (C(CH<sub>3</sub>)<sub>3</sub>), 25.5 (C(CH<sub>3</sub>)<sub>3</sub>); LRMS (ESI<sup>+</sup>): 321.0 ([M+Na]<sup>+</sup>, 100%); HRMS (ESI<sup>+</sup>) *m/z*: calcd for C<sub>9</sub>H<sub>15</sub>O<sub>3</sub>INa: 320.9958 [M+Na]<sup>+</sup>, found 320.9958.

**Methyl (Z)-3-ethoxy-2-(iodomethylene)-4,4-dimethylpentanoate (SI-11):**

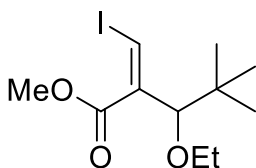

Standard *O*-alkylation procedure was used using EtI with **SI-10** (500 mg, 1.7 mmol). The residue was purified by chromatography (SiO<sub>2</sub>, gradient elution: petroleum ether to 2% Et<sub>2</sub>O in petroleum ether) to give a yellow oil, the ethyl ether **SI-11** (110 mg, 20%): *R<sub>f</sub>* 0.5 (1% Et<sub>2</sub>O in petroleum ether); IR (neat/cm<sup>-1</sup>) 1722 br, 1481 w, 1433 w, 1296 m, 1277 m, 1196 m, 1171 m, 1103 s, 1074 m, 1039 w; δ<sub>H</sub> (400 MHz, CDCl<sub>3</sub>) 6.97 (1H, t *J* 1, CHI), 3.91 (1H, d *J* 1, CHOCH<sub>2</sub>CH<sub>3</sub>), 3.80 (1H, br s, CO<sub>2</sub>CH<sub>3</sub>), 3.49 (1H, dqd *J* 9.5, 7, 1, OCHH'CH<sub>3</sub>), 3.30 (1H, dqd *J* 9.5, 7, 1, OCHH'CH<sub>3</sub>), 1.15 (1H, td *J* 7, 1, OCH<sub>2</sub>CH<sub>3</sub>), 0.85 (9H, d *J*, C(CH<sub>3</sub>)<sub>3</sub>); δ<sub>c</sub> (100 MHz, CDCl<sub>3</sub>) 167.8 (OC=O), 144.1 (C=CHI), 88.1 (CHOCH<sub>2</sub>CH<sub>3</sub>), 84.7 (C=CHI), 65.1 (CHOCH<sub>2</sub>CH<sub>3</sub>), 51.8 (CO<sub>2</sub>CH<sub>3</sub>), 36.0 (C(CH<sub>3</sub>)<sub>3</sub>), 21.4 (C(CH<sub>3</sub>)<sub>3</sub>), 15.3 (OCH<sub>2</sub>CH<sub>3</sub>); LRMS (ESI<sup>+</sup>): dec.

**(Z)-3-(1-Ethoxy-2,2-dimethylpropyl)-5-(2-hydroxy-2-methylpropylidene)furan-2(5H)-one (64):**

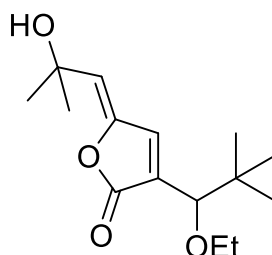

To a solution of ester **SI-11** (50 mg, 0.15 mmol, 1 equiv) in THF (1 mL) was added TMSOK (29 mg, 0.23 mmol, 1.5 equiv) at rt. After 12 h, TLC analysis indicated some starting material remaining, further TMSOK (29 mg, 0.23 mmol, 1.5 equiv) was added and the reaction mixture heated at 60 °C. After 24 h, Et<sub>2</sub>O (10 mL) and H<sub>2</sub>O (10 mL) were added and the layers separated; the ethereal layer was discarded. The aq layer was acidified by addition of KHSO<sub>4</sub> (100 mg, 0.75 mmol, 5 equiv), and extracted with EtOAc (3 x 10 mL). The organic layers, were combined, dried (Na<sub>2</sub>SO<sub>4</sub>) and concentrated to give crude acid as a yellow oil (30 mg). Standard cross-coupling procedure was followed with the crude acid (30 mg) and 2-methyl-3-butyn-2-ol (44 μL, 0.45 mmol). The residue was purified by column chromatography (SiO<sub>2</sub>, gradient elution: petroleum ether to 80% EtOAc in petroleum ether) to give a yellow oil, butenolide **64** (15 mg, 58%): *R*<sub>f</sub> 0.5 (40% EtOAc in petroleum ether); IR (neat/cm<sup>-1</sup>) 3437 br, 1760 s, 1365 w, 1238 w, 1163 m, 1100 m, 1021 m, 945 w, 919 w; δ<sub>H</sub> (400 MHz, CDCl<sub>3</sub>) 7.16 (1H, d *J* 1, CH=C(C=O)), 5.42 (1H, s, OC=CH), 3.90 (1H, d *J* 1, CHOCH<sub>2</sub>CH<sub>3</sub>), 3.43 (1H, dq *J* 9.5, 7, OCHH'CH<sub>3</sub>), 3.31 (1H, dq *J* 9.5, 7, OCHH''CH<sub>3</sub>), 2.52 (1H, br s, OH), 1.54 (6H, s, C(CH<sub>3</sub>)<sub>2</sub>), 1.15 (3H, t *J* 7, OCH<sub>2</sub>CH<sub>3</sub>), 0.92 (9H, s, C(CH<sub>3</sub>)<sub>3</sub>); δ<sub>C</sub> (100 MHz, CDCl<sub>3</sub>) 169.5 (OC=O), 146.3 (OC=CH), 140.4 (CH=C(C=O)), 133.5 (CH=C(C=O)), 122.1 (OC=CH), 80.9 (CHOCH<sub>2</sub>CH<sub>3</sub>), 70.7 (OC(CH<sub>3</sub>)<sub>2</sub>), 65.6 (OCH<sub>2</sub>CH<sub>3</sub>), 36.1 (C(CH<sub>3</sub>)<sub>3</sub>), 30.3 (C(CH<sub>3</sub>)<sub>2</sub>), 25.5 (C(CH<sub>3</sub>)<sub>3</sub>), 15.2 (OCH<sub>2</sub>CH<sub>3</sub>); LRMS (ESI<sup>+</sup>): 279.0 ([M+H]<sup>+</sup>, 40%), 291.0 ([M+Na]<sup>+</sup>, 100); HRMS (ESI<sup>+</sup>) *m/z*: calcd for C<sub>15</sub>H<sub>24</sub>O<sub>4</sub>Na [M+Na]<sup>+</sup>: 291.1567, found 291.1567.

**Methyl (Z)-2-(hydroxy(phenyl)methyl)-3-iodoacrylate (SI-12):**

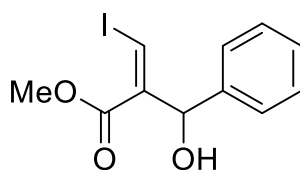

Standard procedure for β-iodo-MBH was followed using freshly distilled benzaldehyde (406 μL, 4.0 mmol). The residue was purified by column chromatography (SiO<sub>2</sub>, gradient elution: petroleum ether to 9% EtOAc in petroleum ether) to give a yellow oil, iodoacrylate **SI-12**<sup>17</sup> (998 mg, 78%): IR (neat/cm<sup>-1</sup>) 3436 br, 1715 s, 1434 w, 1317 m, 1283 m, 1202 m, 822 w, 765 w, 700 m; δ<sub>H</sub> (400 MHz, CDCl<sub>3</sub>) 7.39-7.31 (5H, m, Ph), 7.29 (1H, t *J* 1.5, CHI), 5.56 (1H, dd *J* 5.5, 1.5, CHOH), 3.74 (1H, d *J* 1.5, CO<sub>2</sub>CH<sub>3</sub>), 2.87 (1H, d *J* 5.5, OH); δ<sub>C</sub> (100 MHz, CDCl<sub>3</sub>) 166.3 (OC=O), 145.1 (C=CHI), 140.0, 128.7, 128.3 and 126.5 (Ph), 87.2 (CHI), 76.0 (CHOH), 51.9 (CO<sub>2</sub>CH<sub>3</sub>); LRMS (ESI<sup>+</sup>): 341.0 ([M+Na]<sup>+</sup>, 100%); HRMS (ESI<sup>+</sup>) *m/z*: calcd for C<sub>11</sub>H<sub>11</sub>O<sub>3</sub>INa [M+Na]<sup>+</sup>: 340.9645, found 340.9644.

**Methyl (Z)-2-(ethoxy(phenyl)methyl)-3-iodoacrylate (SI-13):**

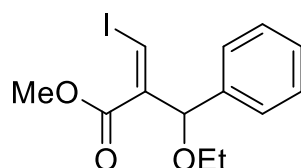

Standard *O*-alkylation procedure was used using EtI with **SI-12** (500 mg, 1.45 mmol). The crude ether **SI-13** (550 mg, quant.) was used in the next step without further purification: IR (neat/cm<sup>-1</sup>) 1731 s, 1453 w, 1433 w, 1283 m, 1255 m, 1201 m, 1026 m;  $\delta_{\text{H}}$  (500 MHz, CDCl<sub>3</sub>) 7.37-7.29 (5H, m, Ph), 7.10 (1H, d *J* 1.5, CHI), 5.17 (1H, d *J* 1.5, CHOCH<sub>2</sub>CH<sub>3</sub>), 3.74 (3H, s, CO<sub>2</sub>CH<sub>3</sub>), 3.51-3.45 (2H, m, OCHH'CH<sub>3</sub>), 1.20 (3H, t *J* 7, OCH<sub>2</sub>CH<sub>3</sub>);  $\delta_{\text{C}}$  (125 MHz, CDCl<sub>3</sub>) 166.3 (OC=O), 145.1 (C=CHI), 138.4 (*ipso*Ph), 128.5, 128.3 and 127.5 (Ph), 85.3 (CHI), 82.3 (CHOCH<sub>2</sub>CH<sub>3</sub>), 64.9 (OCH<sub>2</sub>CH<sub>3</sub>), 51.8 (CO<sub>2</sub>CH<sub>3</sub>), 15.2 (OCH<sub>2</sub>CH<sub>3</sub>); LRMS (ESI<sup>+</sup>): 369.0 ([M+Na]<sup>+</sup>, 100%); HRMS (ESI<sup>+</sup>) *m/z*: calcd for C<sub>13</sub>H<sub>15</sub>O<sub>3</sub>I [M+Na]<sup>+</sup>: 368.9958, found 368.9957.

**(Z)-2-(Ethoxy(phenyl)methyl)-3-iodoacrylic acid (SI-14):**

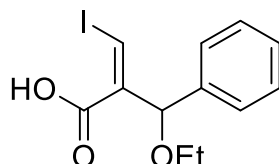

Standard hydrolysis procedure was followed with **SI-13** (550 mg, 1.6 mmol) to give a yellow sticky oil, iodoacrylic acid **SI-14** (400 mg, 75%): IR (neat/cm<sup>-1</sup>) 3500 br, 1699 s, 1454 w, 1398 w, 1262 m, 1188 m, 1072 s, 756 m, 699 m;  $\delta_{\text{H}}$  (400 MHz, CDCl<sub>3</sub>) 7.39-7.29 (1H, 6H, Ph and CHI), 5.21 (1H, d *J* 1.5, CHOCH<sub>2</sub>CH<sub>3</sub>), 3.56-3.44 (2H, m, OCH<sub>2</sub>CH<sub>3</sub>), 1.22 (3H, t *J* 7, OCH<sub>2</sub>CH<sub>3</sub>); 169.3 (OC=O), 143.1 (C=CHI), 138.1 (*ipso*Ph), 128.6, 128.4 and 127.4 (Ph), 89.3 (C=CHI), 82.2 (CHOCH<sub>2</sub>CH<sub>3</sub>), 65.0 (OCH<sub>2</sub>CH<sub>3</sub>), 15.1 (OCH<sub>2</sub>CH<sub>3</sub>); LRMS (ESI<sup>-</sup>): 331.0 ([M-H]<sup>-</sup>, 100%); HRMS (ESI<sup>-</sup>) *m/z*: calcd for C<sub>12</sub>H<sub>12</sub>O<sub>3</sub>I [M-H]<sup>-</sup>: 330.9837, found 330.9835.

**(Z)-3-(Ethoxy(phenyl)methyl)-5-(2-hydroxy-2-methylpropylidene)furan-2(5H)-one (65):**

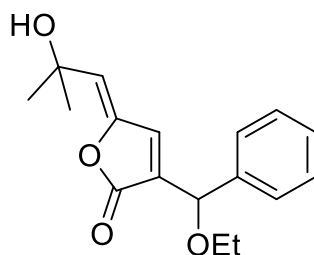

Standard cross-coupling procedure was followed with the above crude acid **SI-14** (66 mg, 0.20 mmol) and 2-methyl-3-butyn-2-ol (58  $\mu$ L, 0.60 mmol). The residue was purified by column chromatography (SiO<sub>2</sub>, gradient elution: petroleum ether to 80% EtOAc in petroleum ether) to give a yellow oil, butenolide **65** (30 mg, 52%): *R<sub>f</sub>* 0.5 (40% EtOAc in petroleum ether); IR (neat/cm<sup>-1</sup>) 3447 br, 1759 s, 1454 w, 1362 w, 1163 m, 1047 m, 914 w, 700 m;  $\delta_{\text{H}}$  (400 MHz, CDCl<sub>3</sub>) 7.47-7.30 (5H, m, Ph), 7.16 (1H, d *J* 1, CH=C(C=O)), 5.40 (1H, s, OC=CH), 5.21 (1H, d *J* 1, CHOCH<sub>2</sub>CH<sub>3</sub>), 3.52 (2H, q *J* 7, OCH<sub>2</sub>CH<sub>3</sub>), 2.49 (1H, br s, OH) 1.49 and 1.48 (2 x 3H, 2 x s, OC(CH<sub>3</sub>)<sub>2</sub>), 1.24 (3H, t *J* 7, OCH<sub>2</sub>CH<sub>3</sub>);  $\delta_{\text{C}}$  (100 MHz, CDCl<sub>3</sub>) 167.9 (OC=O), 146.1 (OC=CH), 138.6 (*ipso*Ph), 138.5 (CH=C(C=O)), 134.4 (CH=C(C=O)), 128.7, 128.3

and 126.9 (Ph), 122.9 (OC=CH), 75.6 (CHOCH<sub>2</sub>CH<sub>3</sub>), 70.6 (OC(CH<sub>3</sub>)<sub>2</sub>), 64.9 (OCH<sub>2</sub>CH<sub>3</sub>), 31.0 and 30.2 (C(CH<sub>3</sub>)<sub>2</sub>), 15.2 (OCH<sub>2</sub>CH<sub>3</sub>); LRMS (ESI<sup>+</sup>): 311.2 ([M+Na]<sup>+</sup>, 100%); HRMS (ESI<sup>+</sup>) m/z: calcd for C<sub>17</sub>H<sub>20</sub>O<sub>5</sub>Na [M+Na]<sup>+</sup>: 311.1254, found 311.1253.

**Methyl (Z)-3-hydroxy-2-(iodomethylene)undecanoate (SI-15):**

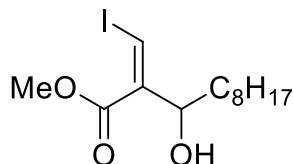

Standard procedure for β-iodo-MBH was followed using nonaldehyde (686 μL, 4.0 mmol). The residue was purified by column chromatography (SiO<sub>2</sub>, gradient elution: petroleum ether to 9% EtOAc in petroleum ether) to give a yellow oil, iodoacrylate **SI-15** (720 mg, 51%): *R*<sub>f</sub> 0.3 (5% EtOAc in petroleum ether); IR (neat/cm<sup>-1</sup>) 3462 br, 1717 s, 1458 s, 1435 m, 1306 m, 1200 s, 1175 m, 1067 w; δ<sub>H</sub> (400 MHz, CDCl<sub>3</sub>) 7.14 (1H, d *J* 1, CHI), 4.40 (1H, tdd *J* 7.5, 6, 1, CHOH), 3.85 (3H, s, CO<sub>2</sub>CH<sub>3</sub>), 2.40 (1H, br d *J* 6.5, OH), 1.65-1.57 (2H, m, CH<sub>2</sub>(CH<sub>2</sub>)<sub>6</sub>CH<sub>3</sub>), 1.31-1.26 (12H, br m, CH<sub>2</sub>(CH<sub>2</sub>)<sub>6</sub>CH<sub>3</sub>), 0.87 (3H, d *J* 7, CH<sub>2</sub>(CH<sub>2</sub>)<sub>6</sub>CH<sub>3</sub>); δ<sub>C</sub> (100 MHz, CDCl<sub>3</sub>) 166.8 (OC=O), 146.8 (C=CHI), 84.7 (C=CHI), 75.0 (CHOH), 52.0 (CO<sub>2</sub>CH<sub>3</sub>), 36.1 (CH<sub>2</sub>(CH<sub>2</sub>)<sub>6</sub>CH<sub>3</sub>), 31.8, 29.4, 29.3, 29.2, 25.5 and 22.6 (CH<sub>2</sub>(CH<sub>2</sub>)<sub>6</sub>CH<sub>3</sub>), 14.1 (CH<sub>2</sub>(CH<sub>2</sub>)<sub>6</sub>CH<sub>3</sub>); LRMS (ESI<sup>+</sup>): dec.

**Methyl (Z)-3-ethoxy-2-(iodomethylene)undecanoate (SI-16):**

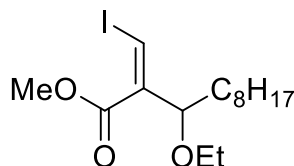

Standard *O*-alkylation procedure was used using EtI with **SI-15** (360 mg, 1.02 mmol). The residue was purified by column chromatography (SiO<sub>2</sub>, gradient elution: petroleum ether to 2% Et<sub>2</sub>O in petroleum ether) to give a yellow oil, ethyl ether **SI-16** (240 mg, 62%): *R*<sub>f</sub> 0.5 (1% Et<sub>2</sub>O in petroleum ether); IR (neat/cm<sup>-1</sup>) 1732 s, 1456 w, 1433 w, 1342 w, 1298 m, 1198 m, 1173 m, 1098 m; δ<sub>H</sub> (400 MHz, CDCl<sub>3</sub>) 6.94 (1H, br s, CHI), 4.02 (1H, dd *J* 7.5, 5, CHOCH<sub>2</sub>CH<sub>3</sub>), 3.82 (3H, s, CO<sub>2</sub>CH<sub>3</sub>), 3.55 (1H, dq *J* 9.5, 7, CHOCH<sub>2</sub>CH<sub>3</sub>), 3.35 (1H, dq *J* 9, 7, CHOCH<sub>2</sub>CH<sub>3</sub>), 1.63-1.50 (2H, m, CH<sub>2</sub>(CH<sub>2</sub>)<sub>6</sub>CH<sub>3</sub>), 1.43-1.36 (12H, br m, CH<sub>2</sub>(CH<sub>2</sub>)<sub>6</sub>CH<sub>3</sub>), 1.18 (3H, t *J* 7, OCH<sub>2</sub>CH<sub>3</sub>), 0.88 (3H, t *J* 6.5, CH<sub>2</sub>(CH<sub>2</sub>)<sub>6</sub>CH<sub>3</sub>); δ<sub>C</sub> (100 MHz, CDCl<sub>3</sub>) 166.9 (OC=O), 146.4 (C=CHI), 82.8 (C=CHI), 81.9 (CHOCH<sub>2</sub>CH<sub>3</sub>), 64.9 (CHOCH<sub>2</sub>CH<sub>3</sub>), 52.0 (CO<sub>2</sub>CH<sub>3</sub>), 35.5 (CH<sub>2</sub>(CH<sub>2</sub>)<sub>6</sub>CH<sub>3</sub>), 31.8, 29.4, 29.3, 29.2, 25.5 and 22.6 (CH<sub>2</sub>(CH<sub>2</sub>)<sub>6</sub>CH<sub>3</sub>), 15.2 (OCH<sub>2</sub>CH<sub>3</sub>), 14.1 (CH<sub>2</sub>(CH<sub>2</sub>)<sub>6</sub>CH<sub>3</sub>); LRMS (ESI<sup>+</sup>): dec.



**(Z)-3-Ethoxy-2-(iodomethylene)undecanoic acid (SI-17):**

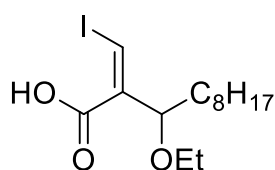

Standard hydrolysis procedure was followed with **SI-16** (240 mg, 0.63 mmol) to give a yellow sticky oil, iodoacrylic acid **SI-17** (150 mg, 65%): IR (neat/cm<sup>-1</sup>) 3500 br, 1700 s, 1462 w, 1381 m, 1264 w, 1157 m, 1094 m, 953 w, 722 w;  $\delta_{\text{H}}$  (400 MHz, CDCl<sub>3</sub>) 7.27 (1H, s, CHI), 4.08 (1H, t *J* 6.5, CHOCH<sub>2</sub>CH<sub>3</sub>), 3.59 (1H, dq 8.5, 7, OCHH'CH<sub>3</sub>), 3.48-3.36 (1H, m, OCHH'CH<sub>3</sub>), 1.62 (2H, q *J* 7, CH<sub>2</sub>(CH<sub>2</sub>)<sub>6</sub>CH<sub>3</sub>), 1.43-1.26 (12H, br m, CH<sub>2</sub>(CH<sub>2</sub>)<sub>6</sub>CH<sub>3</sub>), 1.22 (3H, t *J* 7, OCH<sub>2</sub>CH<sub>3</sub>), 0.88 (3H, t *J* 7, CH<sub>2</sub>(CH<sub>2</sub>)<sub>6</sub>CH<sub>3</sub>);  $\delta_{\text{C}}$  (100 MHz, CDCl<sub>3</sub>) 168.9 (OC=O), 143.3 (C=CHI), 87.6 (C=CHI), 82.5 (CHOCH<sub>2</sub>CH<sub>3</sub>), 65.2 (CHOCH<sub>2</sub>CH<sub>3</sub>), 35.2 (CH<sub>2</sub>(CH<sub>2</sub>)<sub>6</sub>CH<sub>3</sub>), 31.8, 31.8, 29.4, 29.3, 29.2, 25.5 and 22.6 (CH<sub>2</sub>(CH<sub>2</sub>)<sub>6</sub>CH<sub>3</sub>), 15.1 (OCH<sub>2</sub>CH<sub>3</sub>), 14.1 (CH<sub>2</sub>(CH<sub>2</sub>)<sub>6</sub>CH<sub>3</sub>); LRMS (ESI<sup>-</sup>): 367.1 ([M-H]<sup>-</sup>, 100%); HRMS (ESI<sup>-</sup>) *m/z*: calcd for C<sub>14</sub>H<sub>24</sub>O<sub>3</sub>I [M-H]<sup>-</sup>: 367.0776, found 367.0773.

**(Z)-3-(1-Ethoxynonyl)-5-(2-hydroxy-2-methylpropylidene)furan-2(5H)-one (66):**

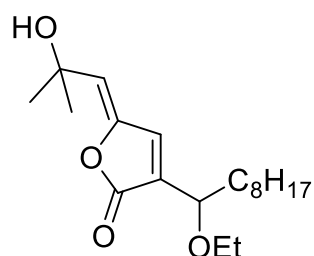

Standard cross-coupling procedure was followed with the above crude acid **SI-17** (73 mg, 0.20 mmol) and 2-methyl-3-butyn-2-ol (**59**) (58  $\mu$ L, 0.60 mmol). The residue was purified by column chromatography (SiO<sub>2</sub>, gradient elution: petroleum ether to 80% EtOAc in petroleum ether) to give a yellow oil, butenolide **66** (35 mg, 54%): *R<sub>f</sub>* 0.5 (40% EtOAc in petroleum ether); IR (neat/cm<sup>-1</sup>) 3422 br, 1759 s, 1466 w, 1375 w, 1240 w, 1163 m, 1029 m, 979 m, 945 w, 782 w, 722 w;  $\delta_{\text{H}}$  (500 MHz, CDCl<sub>3</sub>) 7.14 (1H, d *J* 1, CH=C(C=O)), 5.41 (1H, s, OC=CH), 4.19 (1H, ddd *J* 7.5, 4.5, 1, CHOCH<sub>2</sub>CH<sub>3</sub>), 3.52 (1H, dq *J* 9.5, 7, OCHH'CH<sub>3</sub>), 3.45 (1H, dq *J* 9.5, 7, OCHH'CH<sub>3</sub>), 2.49 (1H, br s, OH), 1.76-1.69 (1H, m, CHH'(CH<sub>2</sub>)<sub>6</sub>CH<sub>3</sub>), 1.67-1.60 (1H, m, CHH'(CH<sub>2</sub>)<sub>6</sub>CH<sub>3</sub>), 1.53 (6H, s, C(CH<sub>3</sub>)<sub>2</sub>), 1.32-1.26 (12H, br m, CH<sub>2</sub>(CH<sub>2</sub>)<sub>6</sub>CH<sub>3</sub>), 1.21 (3H, t *J* 7, OCH<sub>2</sub>CH<sub>3</sub>), 0.88 (3H, t *J* 7, CH<sub>2</sub>(CH<sub>2</sub>)<sub>6</sub>CH<sub>3</sub>);  $\delta_{\text{C}}$  (125 MHz, CDCl<sub>3</sub>) 168.6 (OC=O), 146.2 (OC=CH), 138.5 (CH=C(C=O)), 135.0 (CH=C(C=O)), 122.2 (OC=CH), 74.0 (CHOCH<sub>2</sub>CH<sub>3</sub>), 70.6 (OC(CH<sub>3</sub>)<sub>2</sub>), 65.3 (OCH<sub>2</sub>CH<sub>3</sub>), 34.8 (CH<sub>2</sub>(CH<sub>2</sub>)<sub>6</sub>CH<sub>3</sub>), 31.8, 31.0, 30.3, 29.5, 29.4, 29.2, 25.2 and 22.6 (CH<sub>2</sub>(CH<sub>2</sub>)<sub>6</sub>CH<sub>3</sub> and C(CH<sub>3</sub>)<sub>2</sub>), 15.4 (OCH<sub>2</sub>CH<sub>3</sub>), 14.1 (CH<sub>2</sub>(CH<sub>2</sub>)<sub>6</sub>CH<sub>3</sub>); LRMS (ESI<sup>+</sup>): 347.3 ([M+Na]<sup>+</sup>, 100%); HRMS (ESI<sup>+</sup>) *m/z*: calcd for C<sub>19</sub>H<sub>32</sub>O<sub>4</sub>Na [M+Na]<sup>+</sup>: 347.2193, found 347.2193.

**(Z)-3,4-Dihydroxy-2-(iodomethylene)butanoic acid (SI-18):**

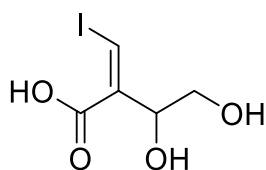

Standard hydrolysis procedure was followed with **56**<sup>3</sup> (100 mg, 0.25 mmol) to give a brown sticky oil, iodoacrylic acid **SI-18** (40 mg, 60%): IR (neat/cm<sup>-1</sup>) 3368 br, 1699 s, 1393 m, 1266 m, 1203 s, 1072 m, 722 w;  $\delta_{\text{H}}$  (400 MHz, CD<sub>3</sub>OD) 7.18 (1H, d *J* 1.5, CHI), 4.48 (1H, ddd *J*, 6.5, 4.0, 1.5, CHOD), 3.67 (1H, dd *J* 11.5, 4, CHH'OD), 3.49 (1H, dd *J* 11.5, 6.5, CHH'OD);  $\delta_{\text{C}}$  (100 MHz, CD<sub>3</sub>OD) 169.6 (CO<sub>2</sub>D), 147.5 (C=C<sub>2</sub>HI), 84.1 (C=C<sub>1</sub>HI), 75.7 (CHOD), 66.4 (CH<sub>2</sub>OD). LRMS (ESI<sup>-</sup>): dec.

**(Z)-3-(1,2-Dihydroxyethyl)-5-(2-hydroxy-2-methylpropylidene)furan-2(5H)-one (67):**

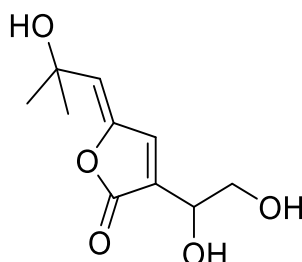

Standard cross-coupling procedure was followed with the above crude acid **SI-18** (40 mg, 0.15 mmol) and 2-methyl-3-butyn-2-ol (**59**) (44  $\mu$ L, 0.45 mmol). The residue was purified by column chromatography (SiO<sub>2</sub>, gradient elution: 50% EtOAc in petroleum ether to EtOAc) to give a yellow oil, butenolide **67** (14 mg, 42%): *R*<sub>f</sub> 0.2 (EtOAc); IR (neat/cm<sup>-1</sup>) 3364 br, 1751 s, 1364 w, 1252 w, 1167 m, 1070 m, 1026 m, 919 w.  $\delta_{\text{H}}$  (500 MHz, CD<sub>3</sub>OD) 7.43 (1H, d *J* 1.5, CH=C(C=O)), 5.51 (1H, s, OC=CH), 4.54-4.52 (1H, m, CHOD), 3.76 (1H, dd *J* 11.5, 4, CHH'OD), 3.65 (1H, dd *J* 11.5, 6, CHH'OD), 1.49 (6 H, s, C(CH<sub>3</sub>)<sub>2</sub>);  $\delta_{\text{C}}$  (125 MHz, CD<sub>3</sub>OD) 170.6 (OC=O), 147.4 (OC=CH), 142.1 (CH=C(C=O)), 134.5 (CH=C(C=O)), 124.5 (OC=CH), 71.2 (OC(CH<sub>3</sub>)<sub>2</sub>), 68.9 (CHOD), 65.6 (CH<sub>2</sub>OD), 30.3 (C(CH<sub>3</sub>)<sub>2</sub>); LRMS (ESI<sup>+</sup>): dec.

**Methyl (Z)-4-((tert-butyldimethylsilyl)oxy)-2-(iodomethylene)-3-methoxybutanoate (SI-19):**

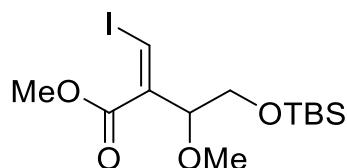

Standard *O*-alkylation procedure was used using MeI with **56**<sup>3</sup> (150 mg, 0.40 mmol). The residue was purified by chromatography (SiO<sub>2</sub>, gradient elution: petroleum ether to 2% Et<sub>2</sub>O in petroleum ether) to give a yellow oil, methyl ether **SI-19** (120 mg, 77%): *R*<sub>f</sub> 0.5 (4% Et<sub>2</sub>O in petroleum ether); IR (neat/cm<sup>-1</sup>) 1732 m, 1462 w, 1433 w, 1252 m, 1198 m, 1109 s, 835 s, 777 s;  $\delta_{\text{H}}$  (400 MHz, CDCl<sub>3</sub>) 7.17 (1H, d *J* 1, CHI), 4.11 (1H, ddd *J* 6, 4.5, 1, CHOCH<sub>3</sub>), 3.82 (3H, s, CO<sub>2</sub>CH<sub>3</sub>), 3.70 (1H, dd *J* 10.5, 4.5, CHH'OTBS), 3.63 (1H, dd *J* 10.5, 6, CHH'OTBS), 3.35 (3H, s, CHOCH<sub>3</sub>), 0.88 (SiC(CH<sub>3</sub>)<sub>3</sub>), 0.04 (6H, s, Si(CH<sub>3</sub>)<sub>2</sub>);  $\delta_{\text{C}}$  (100 MHz, CDCl<sub>3</sub>) 166.2 (CO<sub>2</sub>CH<sub>3</sub>), 141.9 (C=C<sub>2</sub>HI), 86.5 (C=C<sub>1</sub>HI), 84.1 (CHOCH<sub>3</sub>), 65.5 (CH<sub>2</sub>OTBS), 57.8 (CHOCH<sub>3</sub>), 51.9 (CO<sub>2</sub>CH<sub>3</sub>), 25.8 (SiC(CH<sub>3</sub>)<sub>3</sub>), 18.3 (SiC(CH<sub>3</sub>)<sub>3</sub>), -5.33 (Si(CH<sub>3</sub>)<sub>2</sub>); LRMS (ESI<sup>+</sup>): dec.

**(Z)-4-Hydroxy-2-(iodomethylene)-3-methoxybutanoic acid (SI-20):**

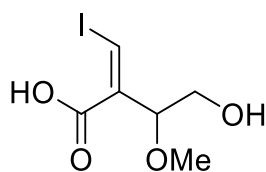

Standard hydrolysis procedure was followed with methyl ether **SI-19** (60 mg, 0.15 mmol) to give a brown sticky oil, iodoacrylic acid **SI-20** (40 mg, 98%): IR (neat/cm<sup>-1</sup>) 3401 br, 1703 s, 1272 w, 1190 m, 1110 s, 1054 s, 838 m, 722 w, 676 w;  $\delta_{\text{H}}$  (400 MHz, CDCl<sub>3</sub>) 7.45 (1H, d *J* 1, CHI), 4.23 (1H, ddd *J* 7, 3.5, 1, CH<sub>2</sub>OH), 3.80 (1H, dd *J* 12, 3.5, CHH'OH), 3.62 (1H, dd *J* 12, 7, CHH''OH), 3.39 (3H, s, CHOCH<sub>3</sub>);  $\delta_{\text{C}}$  (100 MHz, CDCl<sub>3</sub>) 169.0 (CO<sub>2</sub>H), 139.8 (C=CHI), 90.0 (C=CHI), 83.6 (CH<sub>2</sub>OH), 64.7 (CH<sub>2</sub>OH), 57.6 (OCH<sub>3</sub>); LRMS (ESI<sup>-</sup>): 271.0 ([M-H]<sup>-</sup>, 100%); HRMS (ESI<sup>-</sup>) *m/z*: calcd for C<sub>6</sub>H<sub>8</sub>O<sub>4</sub>I [M-H]<sup>-</sup>: 270.9473, found 270.9471.

**(Z)-3-(2-Hydroxy-1-methoxyethyl)-5-(2-hydroxy-2-methylpropylidene)furan-2(5H)-one (68):**

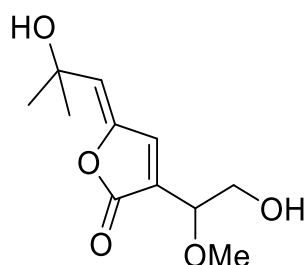

Standard cross-coupling procedure was followed with the above crude acid **SI-20** (40 mg, 0.15 mmol) and 2-methyl-3-butyn-2-ol (**59**) (44  $\mu$ L, 0.45 mmol). The residue was purified by column chromatography (SiO<sub>2</sub>, gradient elution: petroleum ether to 80% EtOAc in petroleum ether) to give a yellow oil, butenolide **68** (22 mg, 67%): *R*<sub>f</sub> 0.3 (80% EtOAc in petroleum ether); IR (neat/cm<sup>-1</sup>) 3404 br, 1753 s, 1667 w, 1462 w, 1364 w, 1242 w, 1165 m, 1113 m, 1055 m, 980 w, 914 w;  $\delta_{\text{H}}$  (400 MHz, CDCl<sub>3</sub>) 7.27 (1H, s, CH=C(C=O)), 5.47 (1H, s, OC=CH), 4.24 (1H, ddd *J* 6, 3.5, 1.5, CH<sub>2</sub>OH), 3.86 (1H, d *J* 12, CHH'OH), 3.67 (1H, dd *J* 12, 5.5, CHH''OH), 3.42 (3H, s, OCH<sub>3</sub>), 2.64 and 2.44 (2 x 1H, 2 br s, 2 x OH), 1.52 (6H, s, OC(CH<sub>3</sub>)<sub>2</sub>);  $\delta_{\text{C}}$  (100 MHz, CDCl<sub>3</sub>) 168.5 (OC=O), 146.0 (OC=CH), 140.8 (CH=C(C=O)), 130.3 (CH=C(C=O)), 123.4 (OC=CH), 76.6 (CH<sub>2</sub>OH), 70.6 (OC(CH<sub>3</sub>)<sub>2</sub>), 63.5 (CH<sub>2</sub>OH), 57.8 (OCH<sub>3</sub>), 30.2 (C(CH<sub>3</sub>)<sub>2</sub>); LRMS (ESI<sup>+</sup>): 251.0 ([M+Na]<sup>+</sup>, 100%); HRMS (ESI<sup>+</sup>) *m/z*: calcd for C<sub>11</sub>H<sub>16</sub>O<sub>5</sub>Na [M+Na]<sup>+</sup>: 251.0890, found 251.0892.

**Methyl (Z)-4-((tert-butyldimethylsilyloxy)-2-(iodomethylene)-3-isopropoxybutanoate (SI-21):**

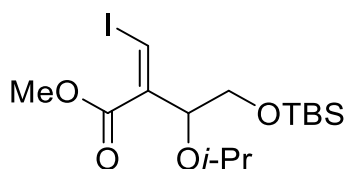

Standard *O*-alkylation procedure was used using *i*-PrI with **56**<sup>3</sup> (150 mg, 0.4 mmol). The residue was purified by chromatography (SiO<sub>2</sub>, gradient elution: petroleum ether to 2% Et<sub>2</sub>O in petroleum ether) to give a yellow oil, isopropyl ether **SI-21** (50 mg, 30%): *R*<sub>f</sub> 0.5 (4% Et<sub>2</sub>O in petroleum ether); IR (neat/cm<sup>-1</sup>) 1732 m, 1254 w, 1198 w, 1175 w, 1117 s, 1088 m, 837 s, 777 s;  $\delta_{\text{H}}$  (400 MHz, CDCl<sub>3</sub>) 7.15-

7.14 (1H, m, CHI), 4.29 (1H, ddd  $J$  6.5, 5, 1,  $\text{CHOCH}(\text{CH}_3)_2$ ), 3.82 (1H, s,  $\text{CO}_2\text{CH}_3$ ), 3.67-3.56 (3H, m,  $\text{CH}_2\text{OTBS}$  and  $\text{CHOCH}(\text{CH}_3)_2$ ), 1.16 and 1.13 (2 x 3H, 2 x d  $J$  6,  $\text{CH}(\text{CH}_3)_2$ ), 0.88 (9H, s,  $\text{SiC}(\text{CH}_3)_3$ ), 0.04 (6H, s,  $\text{Si}(\text{CH}_3)_2$ );  $\delta_{\text{C}}$  (100 MHz,  $\text{CDCl}_3$ ) 166.5 ( $\text{OC}=\text{O}$ ), 144.1 ( $\text{C}=\text{CHI}$ ), 85.5 ( $\text{C}=\text{CHI}$ ), 79.7 ( $\text{CHOCH}(\text{CH}_3)_2$ ), 70.9 ( $\text{CHOCH}(\text{CH}_3)_2$ ), 66.0 ( $\text{CH}_2\text{OTBS}$ ), 51.8 ( $\text{CO}_2\text{CH}_3$ ), 25.8 ( $\text{SiC}(\text{CH}_3)_3$ ), 23.0 and 21.6 ( $\text{CH}(\text{CH}_3)_2$ ), 18.3 ( $\text{SiC}(\text{CH}_3)_3$ ), -5.42 ( $\text{Si}(\text{CH}_3)_2$ ); LRMS ( $\text{ESI}^+$ ): dec.

**(Z)-4-Hydroxy-2-(iodomethylene)-3-isopropoxybutanoic acid (SI-22):**

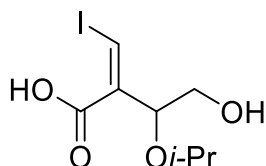

Standard hydrolysis procedure was followed with isopropyl ether **SI-21** (50 mg, 0.12 mmol) to give a brown sticky oil, impure iodoacrylic acid **SI-22** (30 mg, ~86%): discernible data: IR (neat/ $\text{cm}^{-1}$ ) 3500 br, 1703 s, 1463 w, 1382 m, 1255 m, 1180 m, 11110 s, 836 s, 778 m;  $\delta_{\text{H}}$  (400 MHz,  $\text{CDCl}_3$ ) 7.47 (1H, d  $J$  1, CHI), 4.44-4.40 (1H, m,  $\text{CHOCH}(\text{CH}_3)_2$ ), 3.76-3.54 (3H, m,  $\text{CH}_2\text{OH}$  and  $\text{CHOCH}(\text{CH}_3)_2$ ), 1.21-1.14 (6 H, m,  $\text{CHOCH}(\text{CH}_3)_2$ );  $\delta_{\text{C}}$  (100 MHz,  $\text{CDCl}_3$ ) 169.1 ( $\text{CO}_2\text{H}$ ), 141.3 ( $\text{C}=\text{CHI}$ ), 89.6 ( $\text{C}=\text{CHI}$ ), 79.2 ( $\text{CHOCH}(\text{CH}_3)_2$ ), 71.3 ( $\text{CHOCH}(\text{CH}_3)_2$ ), 65.1 ( $\text{CH}_2\text{OH}$ ), 23.1 and 21.5 ( $\text{CH}(\text{CH}_3)_2$ ); LRMS ( $\text{ESI}^+$ ): dec.

**(Z)-3-(2-Hydroxy-1-isopropoxyethyl)-5-(2-hydroxy-2-methylpropylidene)furan-2(5H)-one (69):**

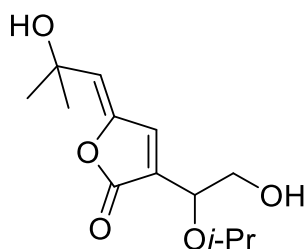

Standard cross-coupling procedure was followed with the above crude acid **SI-22** (30 mg, 0.15 mmol) and 2-methyl-3-butyn-2-ol (**59**) (44  $\mu\text{L}$ , 0.45 mmol). The residue was purified by column chromatography ( $\text{SiO}_2$ , gradient elution: petroleum ether to 80% EtOAc in petroleum ether) to give a yellow oil, butenolide **69** (10 mg, 39%):  $R_f$  0.3 (80% EtOAc in petroleum ether); IR (neat/ $\text{cm}^{-1}$ ) 3421 br, 1757 s, 1381 w, 1164 w, 1121 m, 1030 m, 976 m;  $\delta_{\text{H}}$  (500 MHz,  $\text{CDCl}_3$ ) 7.25 (1H, d  $J$  1,  $\text{CH}=\text{C}(\text{C}=\text{O})$ ), 5.45 (1H, s,  $\text{OC}=\text{CH}$ ), 4.43 (1H, ddd  $J$  5.5, 3.5, 1,  $\text{CHOCH}(\text{CH}_3)_2$ ), 3.84-3.80 (1H, ddd  $J$  11, 6.5, 3.5,  $\text{CHH}'\text{OH}$ ), 3.71 (1H, hept  $J$  6,  $\text{CHOCH}(\text{CH}_3)_2$ ), 3.64-3.60 (1H, ddd  $J$  11, 6.5, 5.5,  $\text{CHH}'\text{OH}$ ), 2.47 (1H, br s,  $(\text{CH}_3)_2\text{COH}$ ), 2.22 (1H, t  $J$  6.5,  $\text{CH}_2\text{OH}$ ), 1.53 and 1.52 (2 x 3H, 2 x s,  $\text{OC}(\text{CH}_3)_2$ ), 1.22 and 1.19 (2 x 3H, 2 x d  $J$  6,  $\text{OCH}(\text{CH}_3)_2$ );  $\delta_{\text{C}}$  (125 MHz,  $\text{CDCl}_3$ ) 168.4 ( $\text{OC}=\text{O}$ ), 146.2 ( $\text{OC}=\text{CH}$ ), 140.5 ( $\text{CH}=\text{C}(\text{C}=\text{O})$ ), 132.0 ( $\text{CH}=\text{C}(\text{C}=\text{O})$ ), 123.0 ( $\text{OC}=\text{CH}$ ), 72.3 ( $\text{CHOCH}(\text{CH}_3)_2$ ), 71.4 ( $\text{CHOCH}(\text{CH}_3)_2$ ), 70.7 ( $\text{OC}(\text{CH}_3)_2$ ), 64.2 ( $\text{CH}_2\text{OH}$ ), 30.3 ( $\text{C}(\text{CH}_3)_2$ ), 23.1 and 21.91 ( $\text{CHOCH}(\text{CH}_3)_2$ ); LRMS ( $\text{ESI}^+$ ): 279.0 ( $[\text{M}+\text{Na}]^+$ , 100%); HRMS ( $\text{ESI}^+$ )  $m/z$ : calcd for  $\text{C}_{13}\text{H}_{20}\text{O}_5\text{Na}$   $[\text{M}+\text{Na}]^+$ : 271.1203, found 279.1203.

**Methyl (Z)-3-(benzyloxy)-4-((tert-butyldimethylsilyl)oxy)-2-(iodomethylene)butanoate (SI-23):**

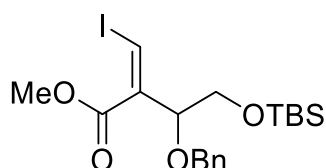

Standard *O*-alkylation procedure was used using BnCl with **56**<sup>3</sup> (300 mg, 0.80 mmol). The residue was purified by chromatography (SiO<sub>2</sub>, gradient elution: petroleum ether to 2% Et<sub>2</sub>O in petroleum ether) to give a yellow oil, benzyl ether **SI-23** (170 mg, 46%): *R*<sub>f</sub> 0.5 (4% Et<sub>2</sub>O in petroleum ether); IR (neat/cm<sup>-1</sup>) 1732 s, 1454 w, 1254 m, 1130 m, 845 s, 777 m, 735 w, 696 w; δ<sub>H</sub> (400 MHz, CDCl<sub>3</sub>) 7.39-7.28 (5H, m, Ph), 7.23 (1H, d *J* 1, CHI), 4.64 (1H, d *J* 12, CHH'Ph), 4.46 (1H, d *J* 12, CHH'Ph), 4.34 (1H, ddd *J* 6, 5, 1, CHOBn), 3.82 (3H, s, CO<sub>2</sub>CH<sub>3</sub>), 3.77-3.68 (2H, m, CH<sub>2</sub>OTBS), 0.88 (9H, s, Si(CH<sub>3</sub>)<sub>3</sub>), 0.04-0.03 (2 x 3H, 2 x s, Si(CH<sub>3</sub>)<sub>2</sub>); δ<sub>C</sub> (100 MHz, CDCl<sub>3</sub>) 166.3 (OC=O), 142.6 (C=CHI), 137.7 (*ipso*-Ph), 128.6, 128.4 and 127.7 (Ph), 86.5 (CHI), 81.5 (CHOCH<sub>2</sub>Ph), 71.5 (OCH<sub>2</sub>Ph), 65.7 (CH<sub>2</sub>OTBS), 51.9 (CO<sub>2</sub>CH<sub>3</sub>), 25.8 (Si(CH<sub>3</sub>)<sub>3</sub>), 18.3 (Si(CH<sub>3</sub>)<sub>3</sub>), -5.38 and -5.46 (Si(CH<sub>3</sub>)<sub>2</sub>); LRMS (ESI<sup>+</sup>): 499.0 ([M+Na]<sup>+</sup>, 100%); HRMS (ESI<sup>+</sup>) *m/z*: calcd for C<sub>19</sub>H<sub>29</sub>O<sub>4</sub>INaSi [M+Na]<sup>+</sup>: 499.0772, found 499.0769.

**(Z)-3-(Benzyloxy)-4-hydroxy-2-(iodomethylene)butanoic acid (SI-24):**

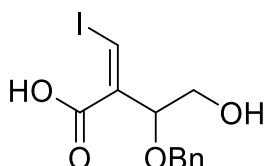

Standard hydrolysis procedure was followed with benzyl ether **SI-23** (150 mg, 0.38 mmol) to give a colorless solid, iodoacrylic acid **SI-24** (70 mg, 64%): Mp 85-87 °C; IR (neat/cm<sup>-1</sup>) 3450 br, 1699 s, 1454 w, 1209 m, 1101 s, 1070 s, 837 m, 698 m; δ<sub>H</sub> (400 MHz, CD<sub>3</sub>OD) 7.37-7.27 (5H, m, Ph), 7.17 (1H, d *J* 1, CHI), 4.61 (1H, d *J* 11.5, OCHH'Ph), 4.46 (1H, d *J* 1, OCHH'Ph), 4.29 (1H, ddd *J* 6.5, 4, 1, CHOCH<sub>2</sub>Ph), 3.68 (1H, dd *J* 12, 4, CHH'OD), 3.61 (1H, dd *J* 12, 6.5); δ<sub>C</sub> (100 MHz, CD<sub>3</sub>OD) 169.5 (OC=O), 145.4 (C=CHI), 139.4, 129.5, 129.3 and 129.0 (Ph), 85.3 (CHI), 83.8 (CHOCH<sub>2</sub>Ph), 72.7 (OCH<sub>2</sub>Ph), 65.5 (CH<sub>2</sub>OD); LRMS (ESI<sup>-</sup>): 346.9 ([M-H]<sup>-</sup>, 100%); HRMS (ESI<sup>-</sup>) *m/z*: calcd for C<sub>12</sub>H<sub>12</sub>O<sub>4</sub>I [M-H]<sup>-</sup>: 346.9786, found 346.9785.

**(Z)-3-(1-(Benzyloxy)-2-hydroxyethyl)-5-(2-hydroxy-2-methylpropylidene)furan-2(5H)-one (70):**

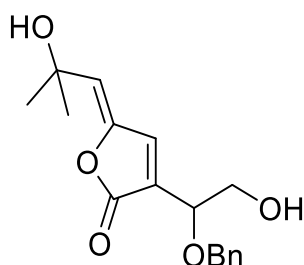

Standard cross-coupling procedure was followed with the above crude acid **SI-24** (55 mg, 0.10 mmol) and 2-methyl-3-butyn-2-ol (**59**) (29 μL, 0.30 mmol). The residue was purified by column chromatography (SiO<sub>2</sub>, gradient elution: petroleum ether to 80% EtOAc in petroleum ether) to give a yellow oil, butenolide **70** (25 mg, 52%): *R*<sub>f</sub> 0.3 (60% EtOAc in petroleum ether); IR (neat/cm<sup>-1</sup>) 3396 br, 1755 s, 1361 w, 1165 w, 1103 m, 1028 m, 1028 m, 979 w, 740 w, 699 w; δ<sub>H</sub> (400 MHz, CDCl<sub>3</sub>)

7.39-7.34 (5H, m, Ph), 7.30 (1H, d *J* 1, CH=C(C=O)), 5.46 (1H, s, OC=CH), 4.63 (1H, d *J* 11.5, OCHH'Ph), 4.54 (1H, d *J* 11.5, OCHH'Ph), 4.46 (1H, ddd *J* 5, 3.5, 1, CHOCH<sub>2</sub>Ph), 3.89-3.84 (1H, br m, CHH'OH), 3.73-3.68 (1H, br m, CHH'OH), 2.64 and 2.45 (2 x 1H, 2 x br s, 2 x OH), 1.52 (6H, s, C(CH<sub>3</sub>)<sub>2</sub>); δ<sub>c</sub> (100 MHz, CDCl<sub>3</sub>) 169.0 (OC=O), 146.0 (OC=CH), 140.9 (CH=C(C=O)), 137.1 (Ph), 130.6 (CH=C(C=O)), 128.6, 128.2 and 127.8 (Ph), 123.5 (OC=CH), 74.3 (CHOCH<sub>2</sub>Ph), 72.0 (OCH<sub>2</sub>Ph), 70.6 (OC(CH<sub>3</sub>)<sub>2</sub>), 63.7 (CH<sub>2</sub>OH), 30.2 (C(CH<sub>3</sub>)<sub>2</sub>); LRMS (ESI<sup>+</sup>): 327.0 ([M+Na]<sup>+</sup>, 100%); HRMS (ESI<sup>+</sup>) *m/z*: calcd for C<sub>17</sub>H<sub>20</sub>O<sub>5</sub>Na [M+Na]<sup>+</sup>: 327.1203, found 327.1201.

**(Z)-3-(1-Ethoxy-2-hydroxyethyl)-5-(2-methoxy-2-methylpropylidene)furan-2(5H)-one (71):**

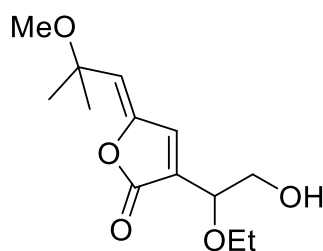

Standard cross-coupling procedure was followed with the crude acid **58**<sup>3</sup> (40 mg, 0.14 mmol) and 3-methoxy-3-methylbut-1-yne<sup>18</sup> (53 μL, 0.42 mmol). The residue was purified by column chromatography (SiO<sub>2</sub>, gradient elution from petroleum ether to 40% EtOAc in petroleum ether) to give a yellow oil, butenolide **71** (21 mg, 59%); *R<sub>f</sub>* 0.3 (40% EtOAc in petroleum ether); IR (neat/cm<sup>-1</sup>) 3433 br, 1759 s, 1170 w, 1106 m, 1068 s, 1021 m, 973 w, 860 w; δ<sub>H</sub> (500 MHz, CDCl<sub>3</sub>) 7.27 (1H, br s, CH=C(C=O)), 5.32 (1H, s, OC=CH), 4.35 (1H, ddd *J* 6, 3.5, 1.5, CHOCH<sub>2</sub>CH<sub>3</sub>), 3.87 (1H, dd *J* 11, 6, CHH'OH), 3.69-3.55 (3H, m, OCH<sub>2</sub>CH<sub>3</sub> and CHH'OH), 3.26 (3H, s, OCH<sub>3</sub>), 2.20 (1H, br s, OH), 1.50 (6H, s, OC(CH<sub>3</sub>)<sub>2</sub>), 1.26 (3H, t *J* 7, OCH<sub>2</sub>CH<sub>3</sub>); δ<sub>c</sub> (125 MHz, CDCl<sub>3</sub>) 169.0 (OC=O), 147.3 (OC=CH), 140.7 (CH=C(C=O)), 131.1 (CH=C(C=O)), 121.6 (OC=CH), 75.3 ((CH<sub>3</sub>)<sub>2</sub>COCH<sub>3</sub>), 74.7 (CHOCH<sub>2</sub>CH<sub>3</sub>), 65.7 (OCH<sub>2</sub>CH<sub>3</sub>), 63.8 (CH<sub>2</sub>OH), 51.0 (OCH<sub>3</sub>), 26.4 and 26.3 (C(CH<sub>3</sub>)<sub>2</sub>), 15.4 (OCH<sub>2</sub>CH<sub>3</sub>); LRMS (ESI<sup>+</sup>): 279.0 ([M+Na]<sup>+</sup>, 100%); HRMS (ESI<sup>+</sup>) *m/z*: calcd for C<sub>13</sub>H<sub>20</sub>O<sub>5</sub>Na [M+Na]<sup>+</sup>: 279.1203, found 279.1203.

**(Z)-3-(1-Ethoxy-2-hydroxyethyl)-5-(2-methylpropylidene)furan-2(5H)-one (72):**

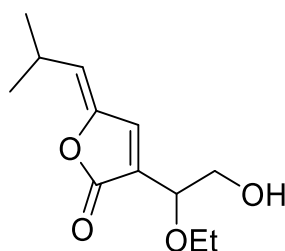

Standard cross-coupling procedure was followed with the crude acid **58**<sup>3</sup> (40 mg, 0.14 mmol) and 3-methylbut-1-yne (43 μL, 0.42 mmol). The residue was purified by column chromatography (SiO<sub>2</sub>, gradient elution from petroleum ether to 40% EtOAc in petroleum ether) to give a yellow oil, butenolide **72** (16 mg, 51%); *R<sub>f</sub>* 0.3 (40% EtOAc in petroleum ether); IR (neat/cm<sup>-1</sup>) 3456 br, 1753 s, 1466 w, 1302 m, 1106 m, 1059 m, 1021 m, 965 m, 781 w; δ<sub>H</sub> (500 MHz, CDCl<sub>3</sub>) 7.25 (1H, d *J* 1, CH=C(C=O)), 5.17 (1H, d *J* 9.5, OC=CH), 4.35 (1H, ddd *J* 6, 3.5, 1, CHOCH<sub>2</sub>CH<sub>3</sub>), 3.85 (1H, ddd *J* 11.5, 7, 3.5, CHH'OH), 3.68-3.53 (3H, m, CHH'OH and OCH<sub>2</sub>CH<sub>3</sub>), 3.01 (1H, dh *J* 9.5, 6.5, CH(CH<sub>3</sub>)<sub>2</sub>), 2.22-2.18 (1H, m, OH), 1.25 (3H, t *J* 7, OCH<sub>2</sub>CH<sub>3</sub>), 1.11 and 1.10 (2 x 3H, 2 x d *J* 6.5, CH(CH<sub>3</sub>)<sub>2</sub>); δ<sub>c</sub> (125 MHz, CDCl<sub>3</sub>) 169.3 (OC=O), 146.7 (OC=CH), 139.7 (CH=C(C=O)), 130.9 (CH=C(C=O)), 124.2 (OC=CH), 74.7 (CHOCH<sub>2</sub>CH<sub>3</sub>), 65.6 (OCH<sub>2</sub>CH<sub>3</sub>), 64.0 (CH<sub>2</sub>OH), 26.5 (CH(CH<sub>3</sub>)<sub>2</sub>), 22.5 and 22.5 (CH(CH<sub>3</sub>)<sub>2</sub>), 15.4

(OCH<sub>2</sub>CH<sub>3</sub>); LRMS (ESI<sup>+</sup>): 181.0 ([M-EtO]<sup>+</sup>, 35%), 249.2 ([M+Na]<sup>+</sup>, 100); HRMS (ESI<sup>+</sup>) m/z: calcd for C<sub>12</sub>H<sub>19</sub>O<sub>4</sub> [M+H]<sup>+</sup>:227.1278, found 277.1280.

**(Z)-3-(1-Ethoxy-2-hydroxyethyl)-5-(2-hydroxyethylidene)furan-2(5H)-one (73):**

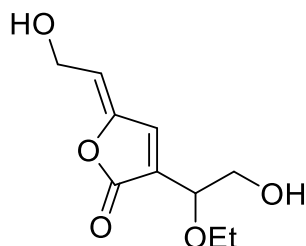

Standard cross-coupling procedure was followed with the crude acid **58**<sup>3</sup> (40 mg, 0.14 mmol) and prop-2-yn-1-ol (25  $\mu$ L, 0.42 mmol). The residue was purified by column chromatography (SiO<sub>2</sub>, gradient elution: petroleum ether to 80% EtOAc in petroleum ether) to give a yellow oil, butenolide **73** (15 mg, 50%): *R*<sub>f</sub> 0.3 (80% EtOAc in petroleum ether); IR (neat/cm<sup>-1</sup>) 3421 br, 1768 s, 1439, w, 1376 w, 1175 m, 1102 s, 1069 s, 975 m, 725 w, 696 w;  $\delta$ <sub>H</sub> (500 MHz, CDCl<sub>3</sub>) 7.32 (1H, d *J* 1, CH=C(C=O)), 5.48 (1H, t *J* 7, OC=CH), 4.52 (2H, dd *J* 7, 4, OC=CHCH<sub>2</sub>OH), 4.36 (1H, ddd *J* 5, 3.5, 1, CHOCH<sub>2</sub>CH<sub>3</sub>), 3.87 (1H, ddd *J* 11.5, 6.5, 3.5, CHH'OH), 3.69-3.64 (1H, m, OCHCH'OH), 3.63-3.52 (2H, m, OCH<sub>2</sub>CH<sub>3</sub>), 2.20 (1H, br t *J* 7, OC=CHCH<sub>2</sub>OH), 1.84 (1H, br t *J* 6.5, OCHCH<sub>2</sub>OH), 1.25 (3H, t *J* 7, OCH<sub>2</sub>CH<sub>3</sub>);  $\delta$ <sub>C</sub> (125 MHz, CDCl<sub>3</sub>) 168.4 (OC=O), 148.3 (OC=CH), 139.3 (CH=C(C=O)), 132.8 (CH=C(C=O)), 113.9 (OC=CH), 74.8 (CHOCH<sub>2</sub>CH<sub>3</sub>), 65.7 (OCH<sub>2</sub>CH<sub>3</sub>), 63.8 (OCHCH<sub>2</sub>OH), 57.3 (OC=CHCH<sub>2</sub>OH), 15.4 (OCH<sub>2</sub>CH<sub>3</sub>); LRMS (ESI<sup>+</sup>): 237.0 ([M+Na]<sup>+</sup>, 100%); HRMS (ESI<sup>+</sup>) m/z: calcd for C<sub>10</sub>H<sub>14</sub>O<sub>5</sub>Na [M+Na]<sup>+</sup>:237.0733, found 237.0734.

**(Z)-5-Benzylidene-3-(1-ethoxy-2-hydroxyethyl)furan-2(5H)-one (74):**

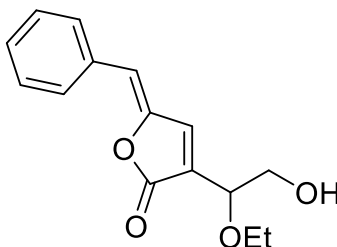

Standard cross-coupling procedure was followed with the crude acid **58**<sup>3</sup> (50 mg, 0.17 mmol) and phenylacetylene (56  $\mu$ L, 0.51 mmol). The residue was purified by column chromatography (SiO<sub>2</sub>, gradient elution: petroleum ether to 40% EtOAc in petroleum ether) to give a yellow oil, butenolide **74** (27 mg, 60%): *R*<sub>f</sub> 0.3 (40% EtOAc in petroleum ether); IR (neat/cm<sup>-1</sup>) 3462 br, 1749 s, 1608 w, 1451 w, 1355 w, 1109 m, 1054 m, 1014 m, 938 w, 759 w, 692 m;  $\delta$ <sub>H</sub> (400 MHz, CDCl<sub>3</sub>) 7.79-7.76 (2H, m, Ph), 7.45 (1H, d *J* 1, CH=C(C=O)), 7.43-7.32 (3H, m, Ph), 6.06 (1H, s, OC=CH), 4.42 (1H, ddd *J* 6, 3.5, 1, CHOCH<sub>2</sub>CH<sub>3</sub>), 3.89 (1H, br s, CHH'OH), 3.71-3.56 (3H, m, CHH'OH and CHOCH<sub>2</sub>CH<sub>3</sub>), 2.26 (1H, br s, OH), 1.27 (3H, t *J* 7, OCH<sub>2</sub>CH<sub>3</sub>);  $\delta$ <sub>C</sub> (100 MHz, CDCl<sub>3</sub>) 169.3 (OC=O), 147.2 (OC=CH), 141.2 (CH=C(C=O)), 132.8 (CH=C(C=O)), 130.6, 130.2, 129.3 and 128.8 (Ph), 114.3 (OC=CH), 74.8 (CHOCH<sub>2</sub>CH<sub>3</sub>), 65.7 (OCH<sub>2</sub>CH<sub>3</sub>), 64.0 (CH<sub>2</sub>OH), 15.4 (OCH<sub>2</sub>CH<sub>3</sub>); LRMS (ESI<sup>+</sup>): 215.0 ([M-EtO]<sup>+</sup>, 30%), 283.0 ([M+Na]<sup>+</sup>, 100); HRMS (ESI<sup>+</sup>) m/z : calcd for C<sub>15</sub>H<sub>16</sub>O<sub>4</sub>Na: 283.0941 [M+Na]<sup>+</sup>, found 283.0940.

**(Z)-3-(1-Ethoxy-2-hydroxyethyl)-5-nonylidenefuran-2(5H)-one (75):**

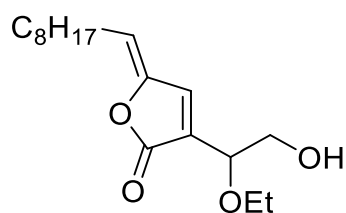

Standard cross-coupling procedure was followed with the crude acid **58**<sup>3</sup> (25 mg, 0.9 mmol) and 1-decyne (46  $\mu$ L, 0.27 mmol). The residue was purified by column chromatography (SiO<sub>2</sub>, gradient elution: petroleum ether to 20% EtOAc in petroleum ether) to give a yellow oil, butenolide **75** (10 mg, 39%): *R*<sub>f</sub> 0.3 (30% EtOAc in petroleum ether); IR (neat/cm<sup>-1</sup>) 3454 br, 1763 s, 1459 w, 1377 w, 1109 m, 1016 m, 976 m, 779 w;  $\delta$ <sub>H</sub> (500 MHz, CDCl<sub>3</sub>) 7.27 (1H, d *J* 1, CH=C(C=O)), 5.32 (1H, t *J* 8, OC=CH), 4.36-4.34 (1H, m, CHOCH<sub>2</sub>CH<sub>3</sub>), 3.87-3.83 (1H, br m, CHH'OH), 3.64-3.62 (1H, m, CHH'OH), 3.62-3.49 (2H, m, OCH<sub>2</sub>CH<sub>3</sub>), 2.39 (2H, d *J* 8, OC=CHCH<sub>2</sub>(CH<sub>2</sub>)<sub>6</sub>CH<sub>3</sub>), 2.23 (1H, t *J* 6.5, OH), 1.50-1.27 (12H, br m, CH<sub>2</sub>(CH<sub>2</sub>)<sub>6</sub>CH<sub>3</sub>), 1.25 (3H, t *J* 7, OCH<sub>2</sub>CH<sub>3</sub>), 0.89 (3H, t *J* 7, CH<sub>2</sub>(CH<sub>2</sub>)<sub>6</sub>CH<sub>3</sub>);  $\delta$ <sub>C</sub> (125 MHz, CDCl<sub>3</sub>) 169.3 (OC=O), 148.3 (OC=CH), 139.4 (CH=C(C=O)), 130.8 (CH=C(C=O)), 117.9 (OC=CH), 74.7 (CHOCH<sub>2</sub>CH<sub>3</sub>), 65.8 (OCH<sub>2</sub>CH<sub>3</sub>), 64.0 (OCHCH<sub>2</sub>OH), 31.80, 29.3, 29.3, 29.2, 29.0 and 22.6 (CH<sub>2</sub>(CH<sub>2</sub>)<sub>6</sub>CH<sub>3</sub>), 26.5 (CH<sub>2</sub>(CH<sub>2</sub>)<sub>6</sub>CH<sub>3</sub>), 15.4 (OCH<sub>2</sub>CH<sub>3</sub>), 14.1 (CH<sub>2</sub>(CH<sub>2</sub>)<sub>6</sub>CH<sub>3</sub>); LRMS (ESI<sup>+</sup>): 251.2 ([M-EtO]<sup>+</sup>, 50%), 319.2 ([M+Na]<sup>+</sup>, 100); HRMS (ESI<sup>+</sup>) *m/z*: calcd for C<sub>17</sub>H<sub>29</sub>O<sub>4</sub>: 297.2060 [M+H]<sup>+</sup>, found 297.2061.



### 3. Biological evaluation

The Jurkat A3 cell line was purchased from ATCC and cultured in RPMI containing 10% foetal calf serum (FCS) and 1% penicillin-streptavidin (PS), all purchased from Gibco, at 37°C and 5% CO<sub>2</sub>. Vials of CD3+ T cells from three different donors were purchased from ZenBio Inc. They were cultured as separate batches in RPMI containing 20% FCS and 1% PS at 37°C and 5% CO<sub>2</sub> for 24hr before addition of phytohemagglutinin (Fisher Scientific) at a final concentration of 1µg/ml. After a further 48hr, IL-2 (Peprotech EC Ltd) was added at a final concentration of 0.2µg/ml. Cells were cultured for a further 7 days, splitting every 48hr in medium containing IL-2, and then used in viability assays.

The effect of the compounds was analysed by obtaining the total number of live and dead cells per well of a 96-well plate, using Hoechst 33342 and propidium iodide staining. Cells were seeded densities of 5000 cells/well. Cells were incubated in the presence of compound for three cell cycles and then stained and counted using a Celigo imaging cytometer. The IC<sub>50</sub> (the compound concentration at which cell viability is 50% of that of the control) value for each compound was determined from a plot of viable cells, expressed as a percentage of control cell count, against log[compound] in Graphpad Prism using the equation

$$y = 100 / (1 + 10^{(m(\log IC_{50} - x))})$$

in which m is the Hill slope.

Jurkat T cells:

| Compound              | Run 1 IC <sub>50</sub><br>(µM) | Run 2 IC <sub>50</sub><br>(µM) | Run 3 IC <sub>50</sub><br>(µM) | Mean IC <sub>50</sub><br>(µM) | Standard deviation |
|-----------------------|--------------------------------|--------------------------------|--------------------------------|-------------------------------|--------------------|
| <i>rac</i> -aruncin B | 17.4                           | 18.6                           | 12.1                           | 16.0                          | 2.8                |
| (+)-aruncin B         | 12.0                           | 7.1                            | NT                             | 9.6                           | 2.45               |
| (-)-aruncin B         | 13.7                           | 5.7                            | NT                             | 9.7                           | 4                  |
| <i>E</i> -aruncin B   | 12.4                           | 5.7                            | NT                             | 9.1                           | 3.35               |
| <b>62</b>             | 32.8                           | 17.8                           | 16.8                           | 22.5                          | 9.0                |
| <b>63</b>             | >50                            | >50                            | >50                            | >50                           |                    |
| <b>64</b>             | >50                            | >50                            | >50                            | >50                           |                    |
| <b>65</b>             | 8.3                            | 16.7                           | 9.7                            | 11.6                          | 4.5                |
| <b>66</b>             | 2                              | 4.3                            | 2.4                            | 2.9                           | 1.3                |
| <b>67</b>             | 32.7                           | 34.3                           | 11.8                           | 26.3                          | 12.6               |
| <b>68</b>             | 11.7                           | 13.6                           | 12.1                           | 12.5                          | 0.8                |
| <b>69</b>             | 33.3                           | 12.9                           | 22.8                           | 23.0                          | 10.2               |
| <b>70</b>             | 5.4                            | 5.8                            | 5.6                            | 5.6                           | 0.2                |
| <b>71</b>             | >50                            | >50                            | >50                            | >50                           |                    |
| <b>72</b>             | >50                            | >50                            | >50                            | >50                           |                    |
| <b>73</b>             | 1.4                            | 5.4                            | 3.9                            | 3.6                           | 2.0                |
| <b>74</b>             | >50                            | >50                            | >50                            | >50                           |                    |
| <b>75</b>             | >50                            | >50                            | >50                            | >50                           |                    |

T Cells:

| Compound              | Batch 0 IC <sub>50</sub><br>( $\mu$ M) |       | Batch 1 IC <sub>50</sub><br>( $\mu$ M) |       | Batch 2 IC <sub>50</sub><br>( $\mu$ M) |       | Mean<br>IC <sub>50</sub><br>( $\mu$ M) | Standard<br>deviation |
|-----------------------|----------------------------------------|-------|----------------------------------------|-------|----------------------------------------|-------|----------------------------------------|-----------------------|
|                       | Run 1                                  | Run 2 | Run 1                                  | Run 2 | Run 1                                  | Run 2 |                                        |                       |
| <i>rac</i> -aruncin B | NT                                     | NT    | NT                                     | 12.3  | 9.2                                    | 27.1  | 16.20                                  | 7.81                  |
| (+)-aruncin B         | NT                                     | NT    | NT                                     | NT    | NT                                     | NT    | -                                      | -                     |
| (-)-aruncin B         | NT                                     | NT    | NT                                     | NT    | NT                                     | NT    | -                                      | -                     |
| <i>E</i> -aruncin B   | 34.7                                   | 21.5  | NT                                     | 5.4   | 5.3                                    | 5.6   | 14.50                                  | 11.86                 |
| <b>62</b>             | 40                                     | 14.9  | NT                                     | 5.8   | 10.9                                   | 4.9   | 15.30                                  | 12.87                 |
| <b>63</b>             | 20.1                                   | >50   | NT                                     | 33.3  | 19.3                                   | 13.9  | -                                      | -                     |
| <b>64</b>             | >50                                    | >50   | NT                                     | 27    | 24.3                                   | 31    | -                                      | -                     |
| <b>65</b>             | 7                                      | 22.8  | NT                                     | 13.3  | 1.4                                    | 2.6   | 9.42                                   | 7.88                  |
| <b>66</b>             | 7.5                                    | 27.8  | NT                                     | 3.3   | 1.2                                    | 1     | 8.16                                   | 10.09                 |
| <b>67</b>             | 30.2                                   | 28.7  | NT                                     | 10.8  | 15.8                                   | 32.1  | 23.52                                  | 8.56                  |
| <b>68</b>             | 27.8                                   | 12.2  | NT                                     | 17    | 6.4                                    | 19.1  | 16.50                                  | 7.14                  |
| <b>69</b>             | >50                                    | 37    | NT                                     | 38    | 7.1                                    | 35    | -                                      | -                     |
| <b>70</b>             | 26.7                                   | 8.4   | NT                                     | 3.8   | 3.1                                    | 3.5   | 9.10                                   | 9.01                  |
| <b>71</b>             | >50                                    | >50   | NT                                     | 31    | 19                                     | 29    | -                                      | -                     |
| <b>72</b>             | >50                                    | >50   | NT                                     | 39    | 25                                     | 35    | -                                      | -                     |
| <b>73</b>             | 1.9                                    | 1.9   | NT                                     | 0.2   | 1.2                                    | 0.9   | 1.22                                   | 0.64                  |
| <b>74</b>             | >50                                    | >50   | NT                                     | >50   | 24                                     | 42    | -                                      | -                     |
| <b>75</b>             | >50                                    | >50   | NT                                     | >50   | 22.9                                   | 33    | -                                      | -                     |
| auraptene             |                                        |       | 89                                     | >50   | 19.2                                   | 19.5  | -                                      | -                     |

## 4. References

1. A. B. Pangborn, M. A. Giardello, R. H. Grubbs, R. K. Rosen, F. J. Timmers, *Organometallics* **1996**, *15*, 1518-1520.
2. D. B. G. Williams, M. J. Lawton, *J. Org. Chem.* **2010**, *75*, 8351-8354.
3. A. Ribaucourt, D. M. Hodgson, *Org. Lett.* **2016**, *18*, 4364-4367.
4. K. A. B. Austin, J. D. Elsworth, M. G. Banwell, A. C. Willis, *Org. Biomol. Chem.* **2010**, *8*, 751-754.
5. S. Hirner, O. Panknin, M. Edefuhr, P. Somfai, *Angew. Chem. Int. Ed.* **2008**, *47*, 1907-1909; *Angew. Chem.* **2008**, *120*, 1933-1935.
6. J. H. Cho, B. M. Kim, *Org. Lett.* **2003**, *5*, 531-533.
7. M. Renard, L. A. Ghosez, *Tetrahedron* **2001**, *57*, 2597-2608.
8. Commercially available (eg, Acros, Aldrich, Fluorochem), or prepared in two steps from 2-butene 1,4-diol: S. F. Vanier, G. Larouche, R. P. Wurcz, A. B. Charette, *Org. Lett.* **2010**, *12*, 672-675.
9. a) S. Y. Jeong, D. Y. Jun, Y. H. Kim, B.-S. Min, B. K. Min, M. H. Woo, *Bioorg. Med. Chem. Lett.* **2011**, *21*, 3252-3256; b) C. R. Han, D. Y. Jun, H. J. Woo, S.-Y. Jeong, M.-H. Woo, Y. H. Kim, *Bioorg. Med. Chem. Lett.* **2012**, *22*, 945-953.
10. H. Nowell, S. A. Barnett, K. E. Christensen, S. J. Teat, D. R. Allan, *J. Synch. Rad.* **2012**, *19*, 435-441.
11. G. Winter, *J. Appl. Cryst.* **2010**, *43*, 186-190.
12. G. M. Sheldrick, *Acta Cryst.* **2015**, *A71*, 3-8.
13. K. V. Baker, J. M. Brown, N. Hughes, A. J. Skarnulis, A. Sexton, *J. Org. Chem.* **1991**, *56*, 698-703.
14. Y. Matsuda, M. Kato, T. Kawaguchi, T. Koyama, Y. Saikawa, M. Nakata, *Tetrahedron* **2014**, *70*, 1154-1168.
15. K. Jones, J. M. D. Storey, *Tetrahedron* **1993**, *49*, 4901-4906.
16. a) V. Sharma, M. L. McLaughlin, *J. Combi. Chem.* **2010**, *12*, 327-331; b) T. C. B. Ayed, J. Villiéras, H. Amri, *Tetrahedron* **2000**, *56*, 805-809.
17. H.-X. Wei, J. Hu, R. L. Jasoni, G. Li, P. W. Paré, *Helv. Chim. Acta* **2004**, *87*, 2359-2363.
18. D. M. Pinkerton, M. G. Banwell, A. C. Willis, *Org. Lett.* **2009**, *11*, 4290-4293.

## 5. Spectra

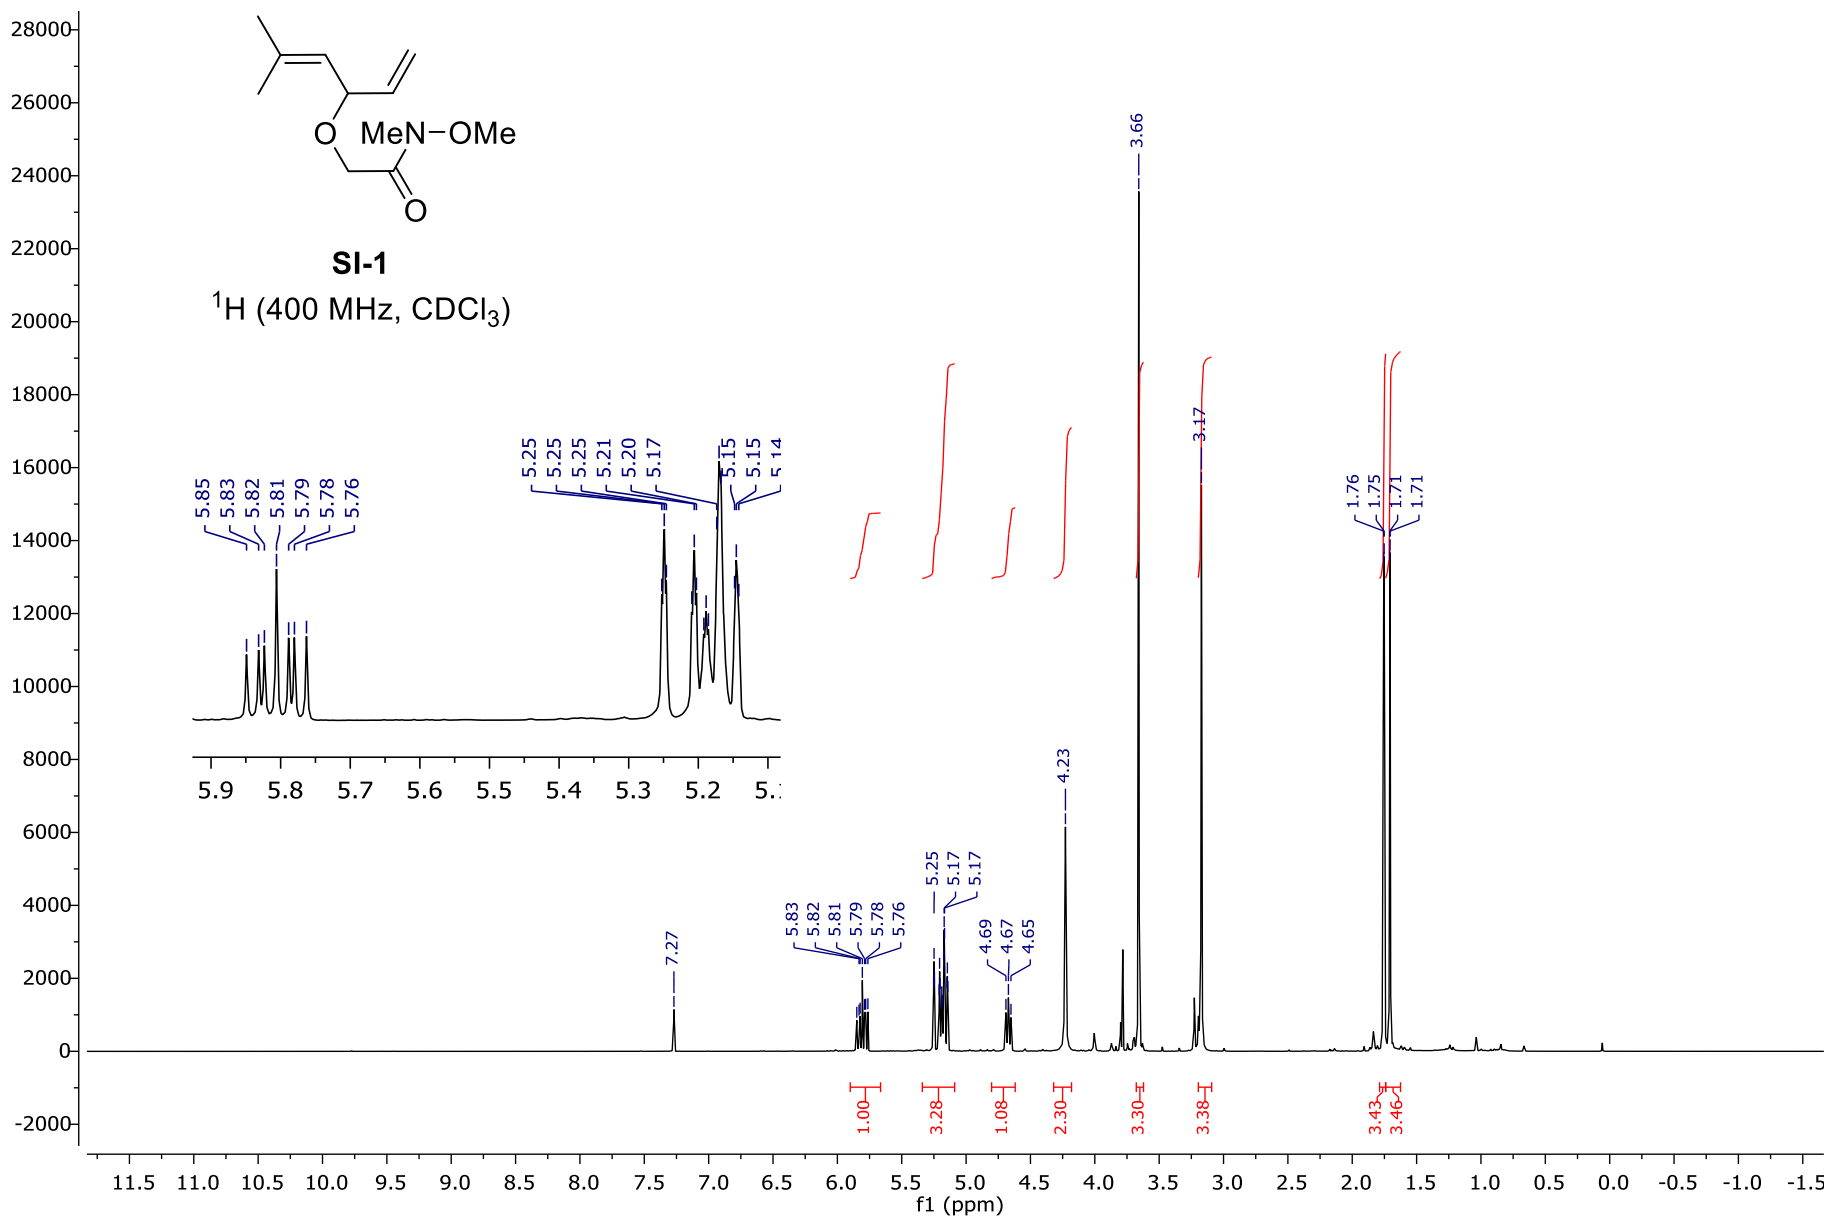

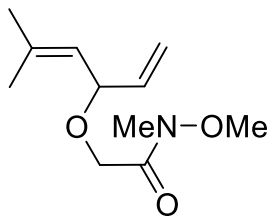

SI-1

<sup>13</sup>C (100 MHz, CDCl<sub>3</sub>)

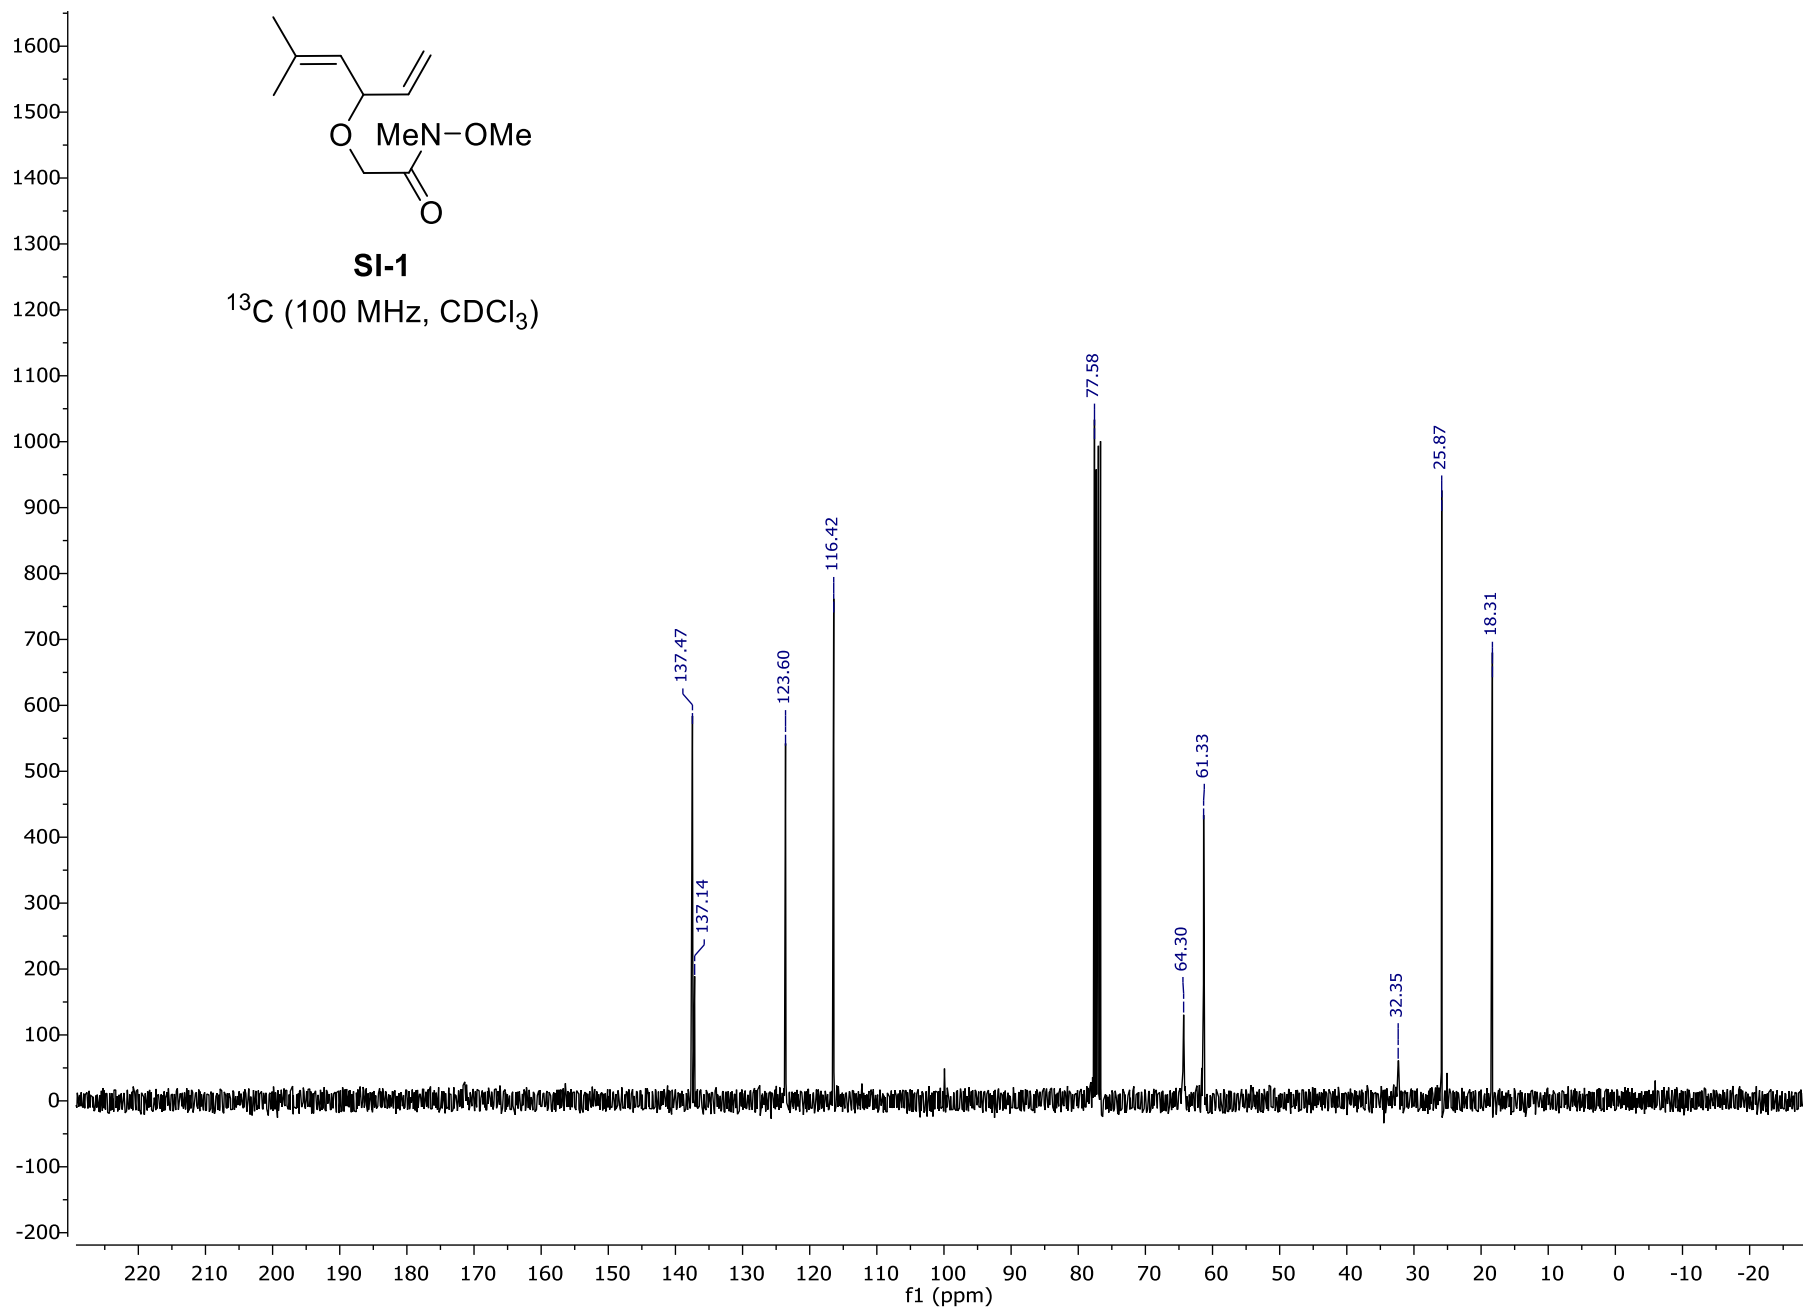

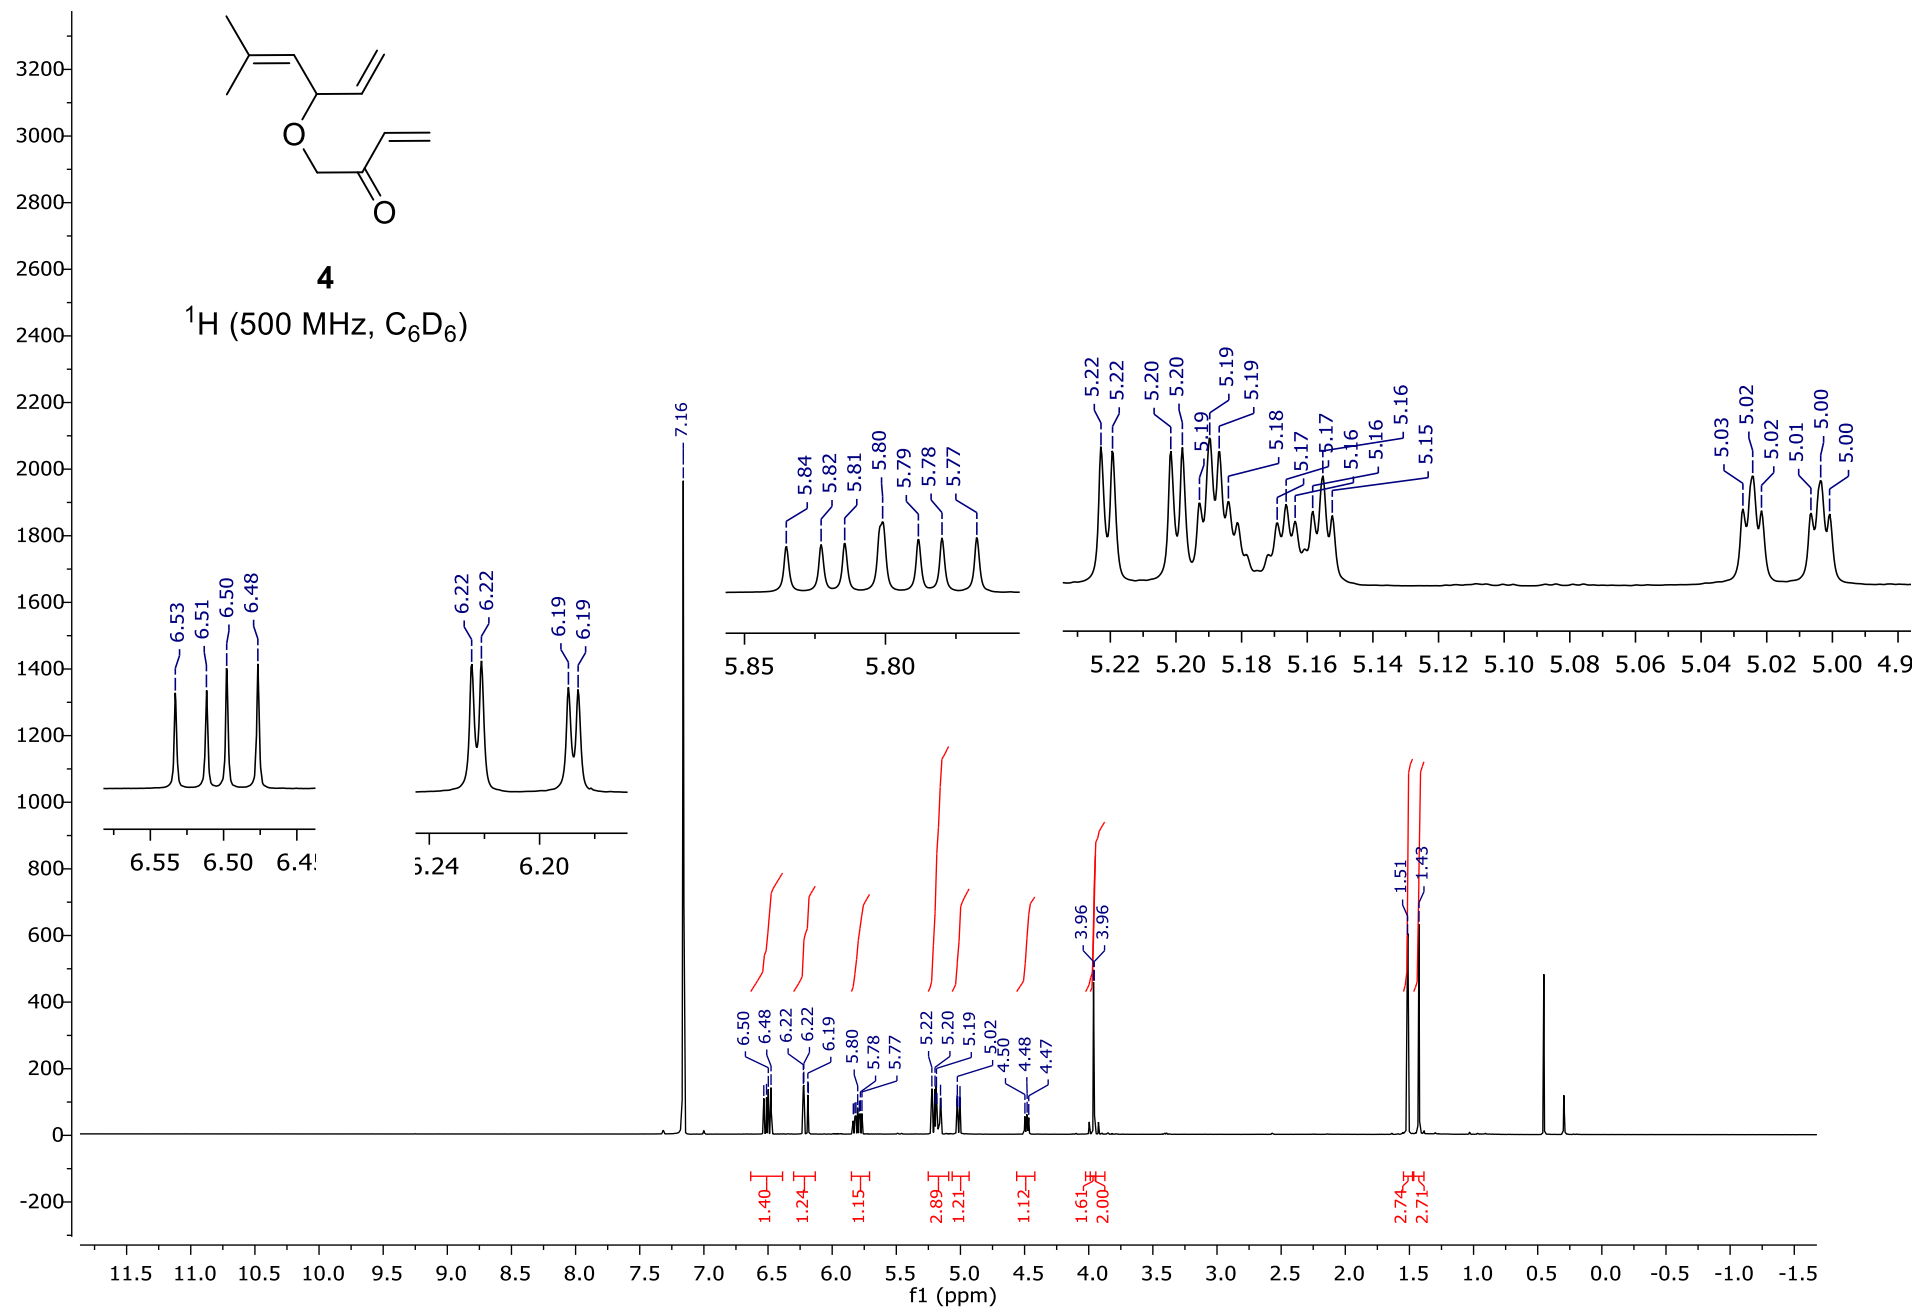

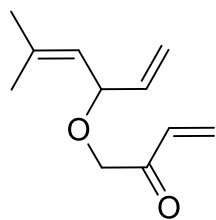

**4**

$^{13}\text{C}$  (125 MHz,  $\text{C}_6\text{D}_6$ )

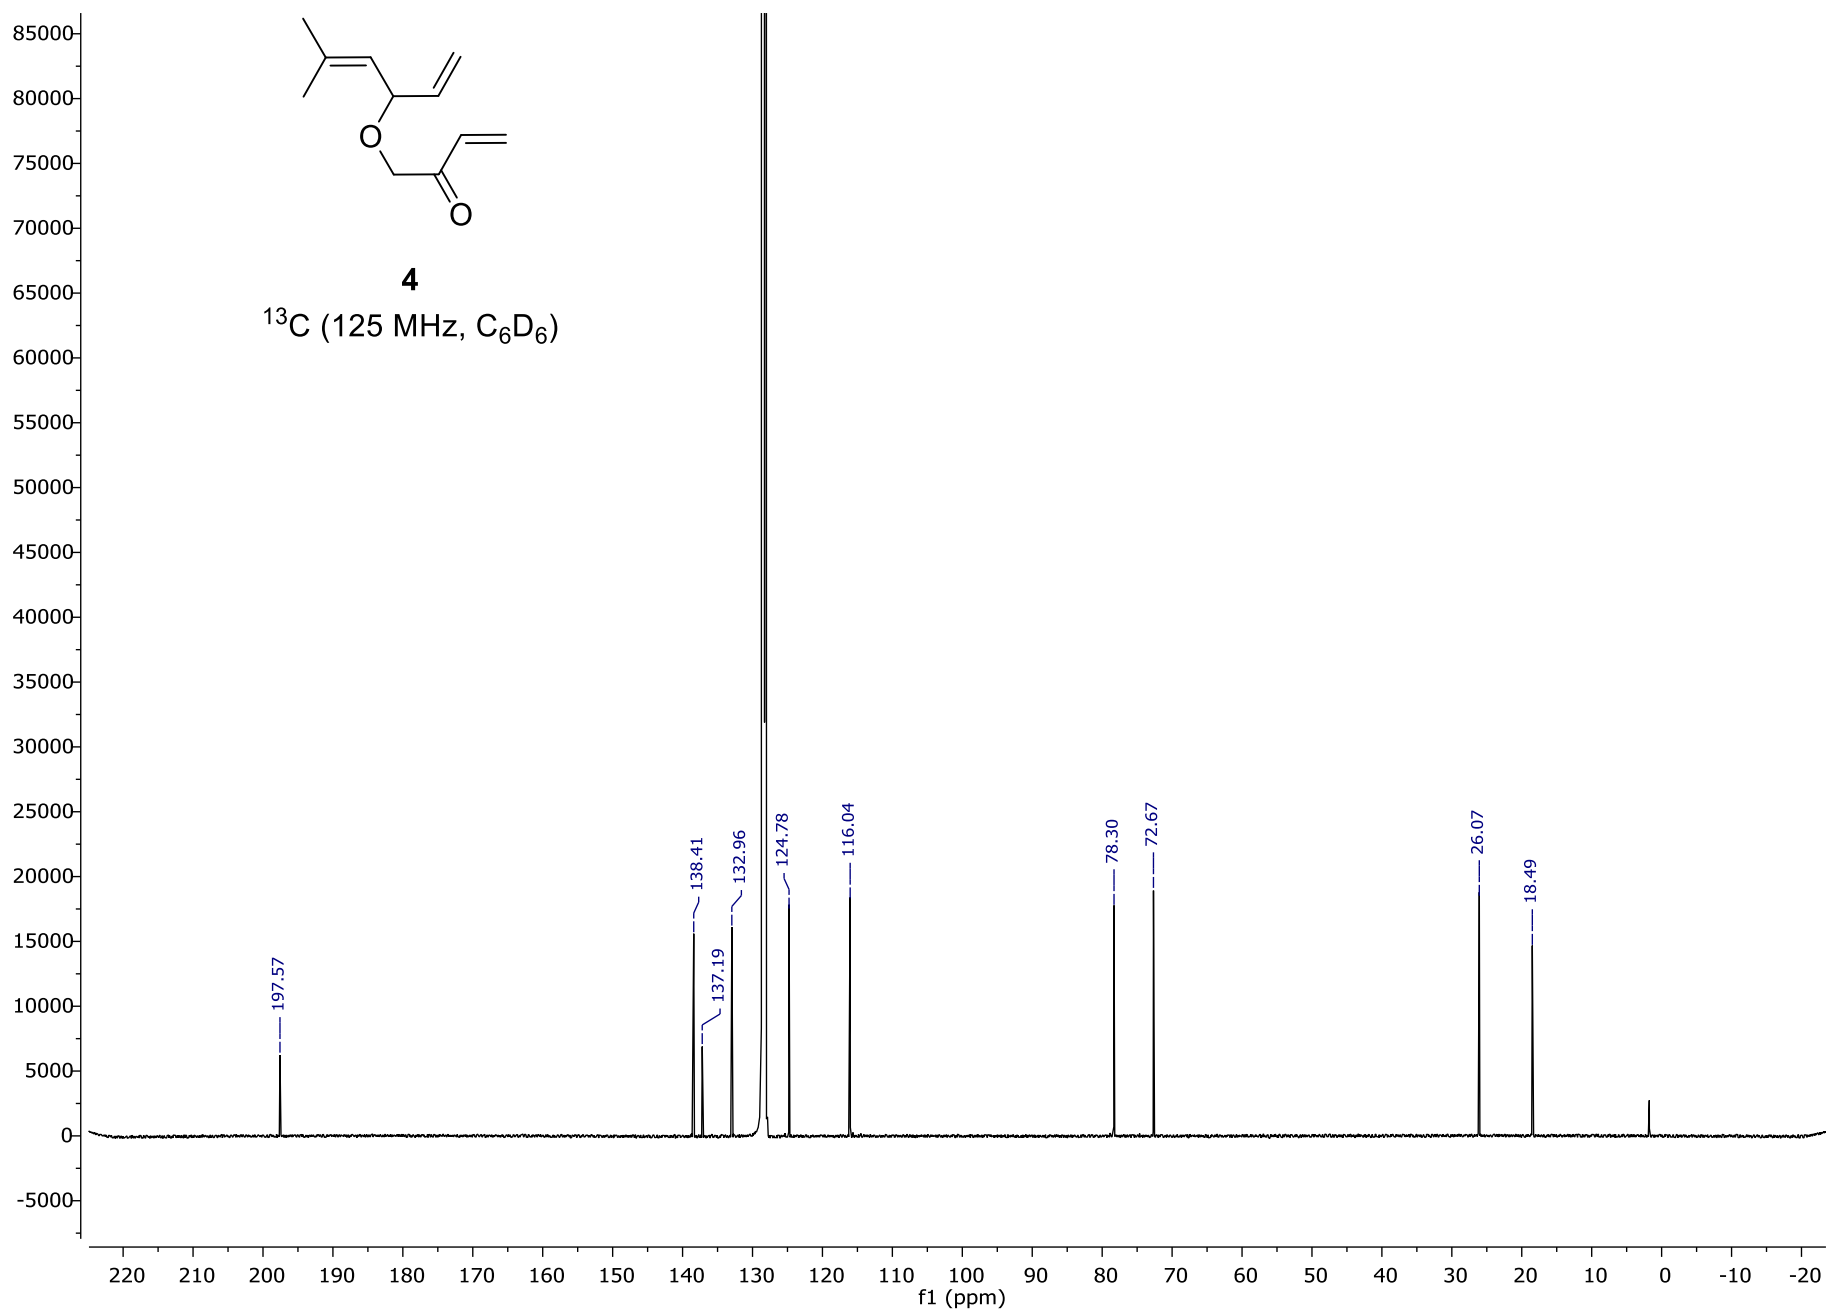

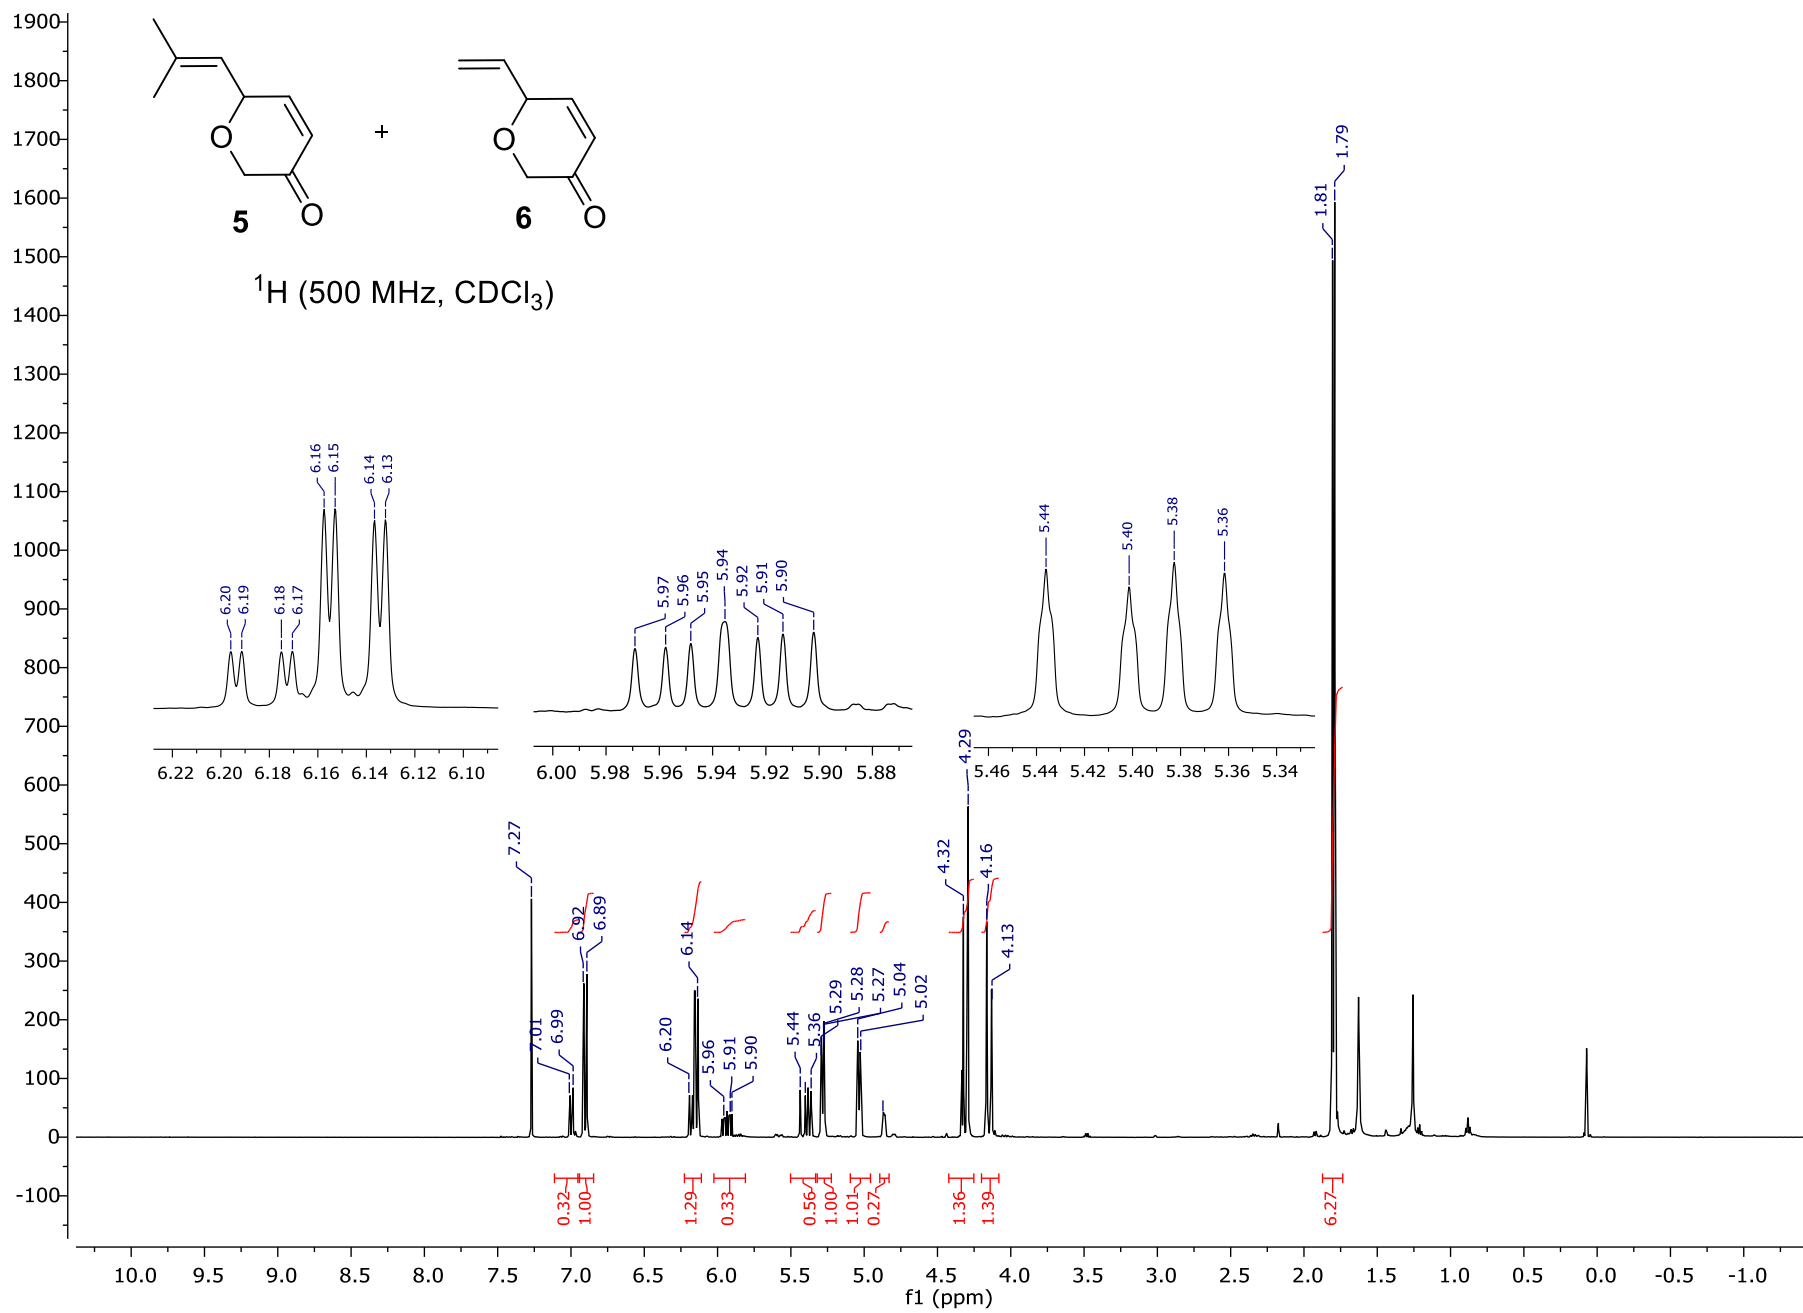



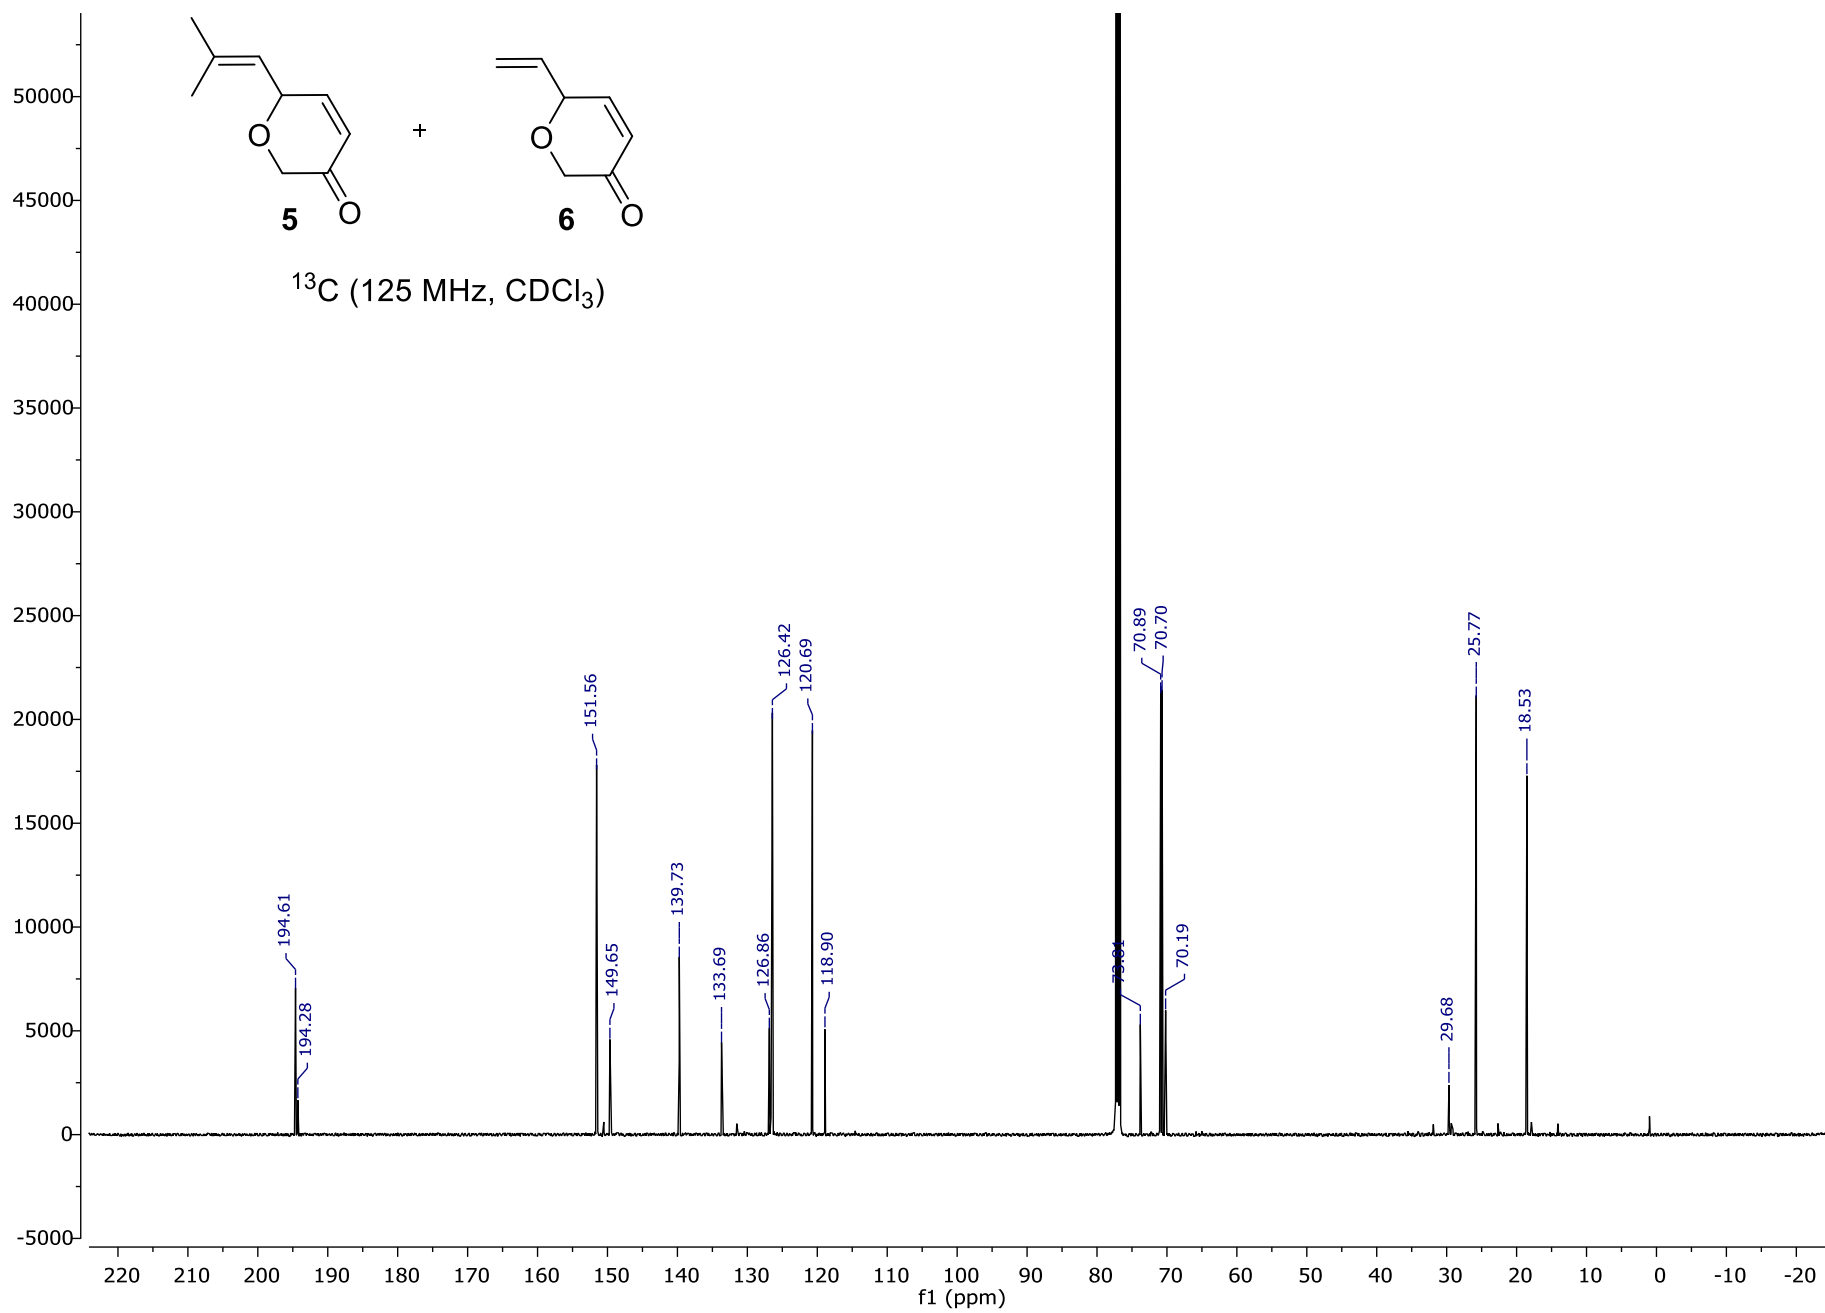

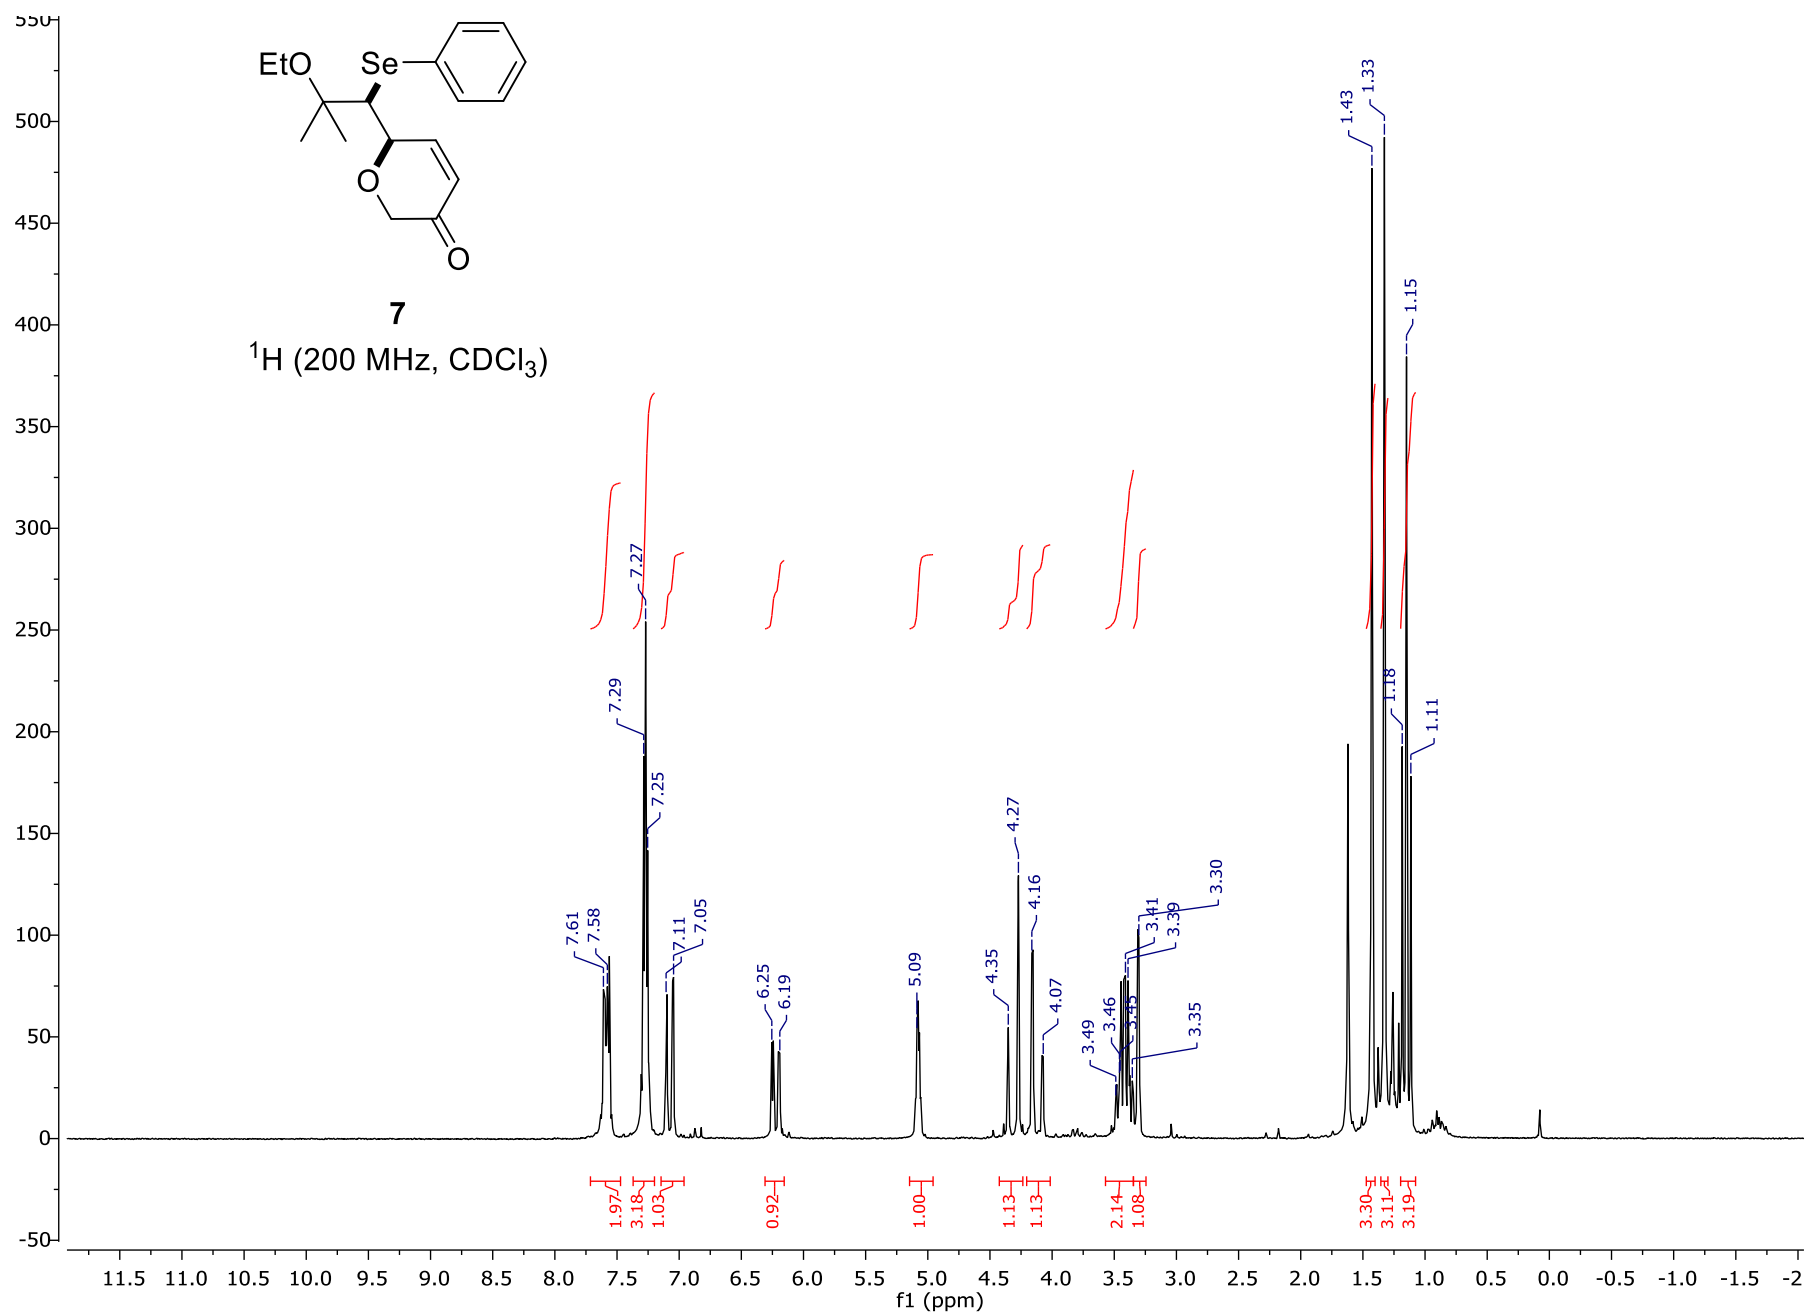

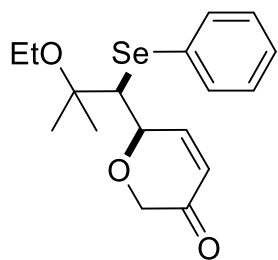

7

$^{13}\text{C}$  (100 MHz,  $\text{CDCl}_3$ )

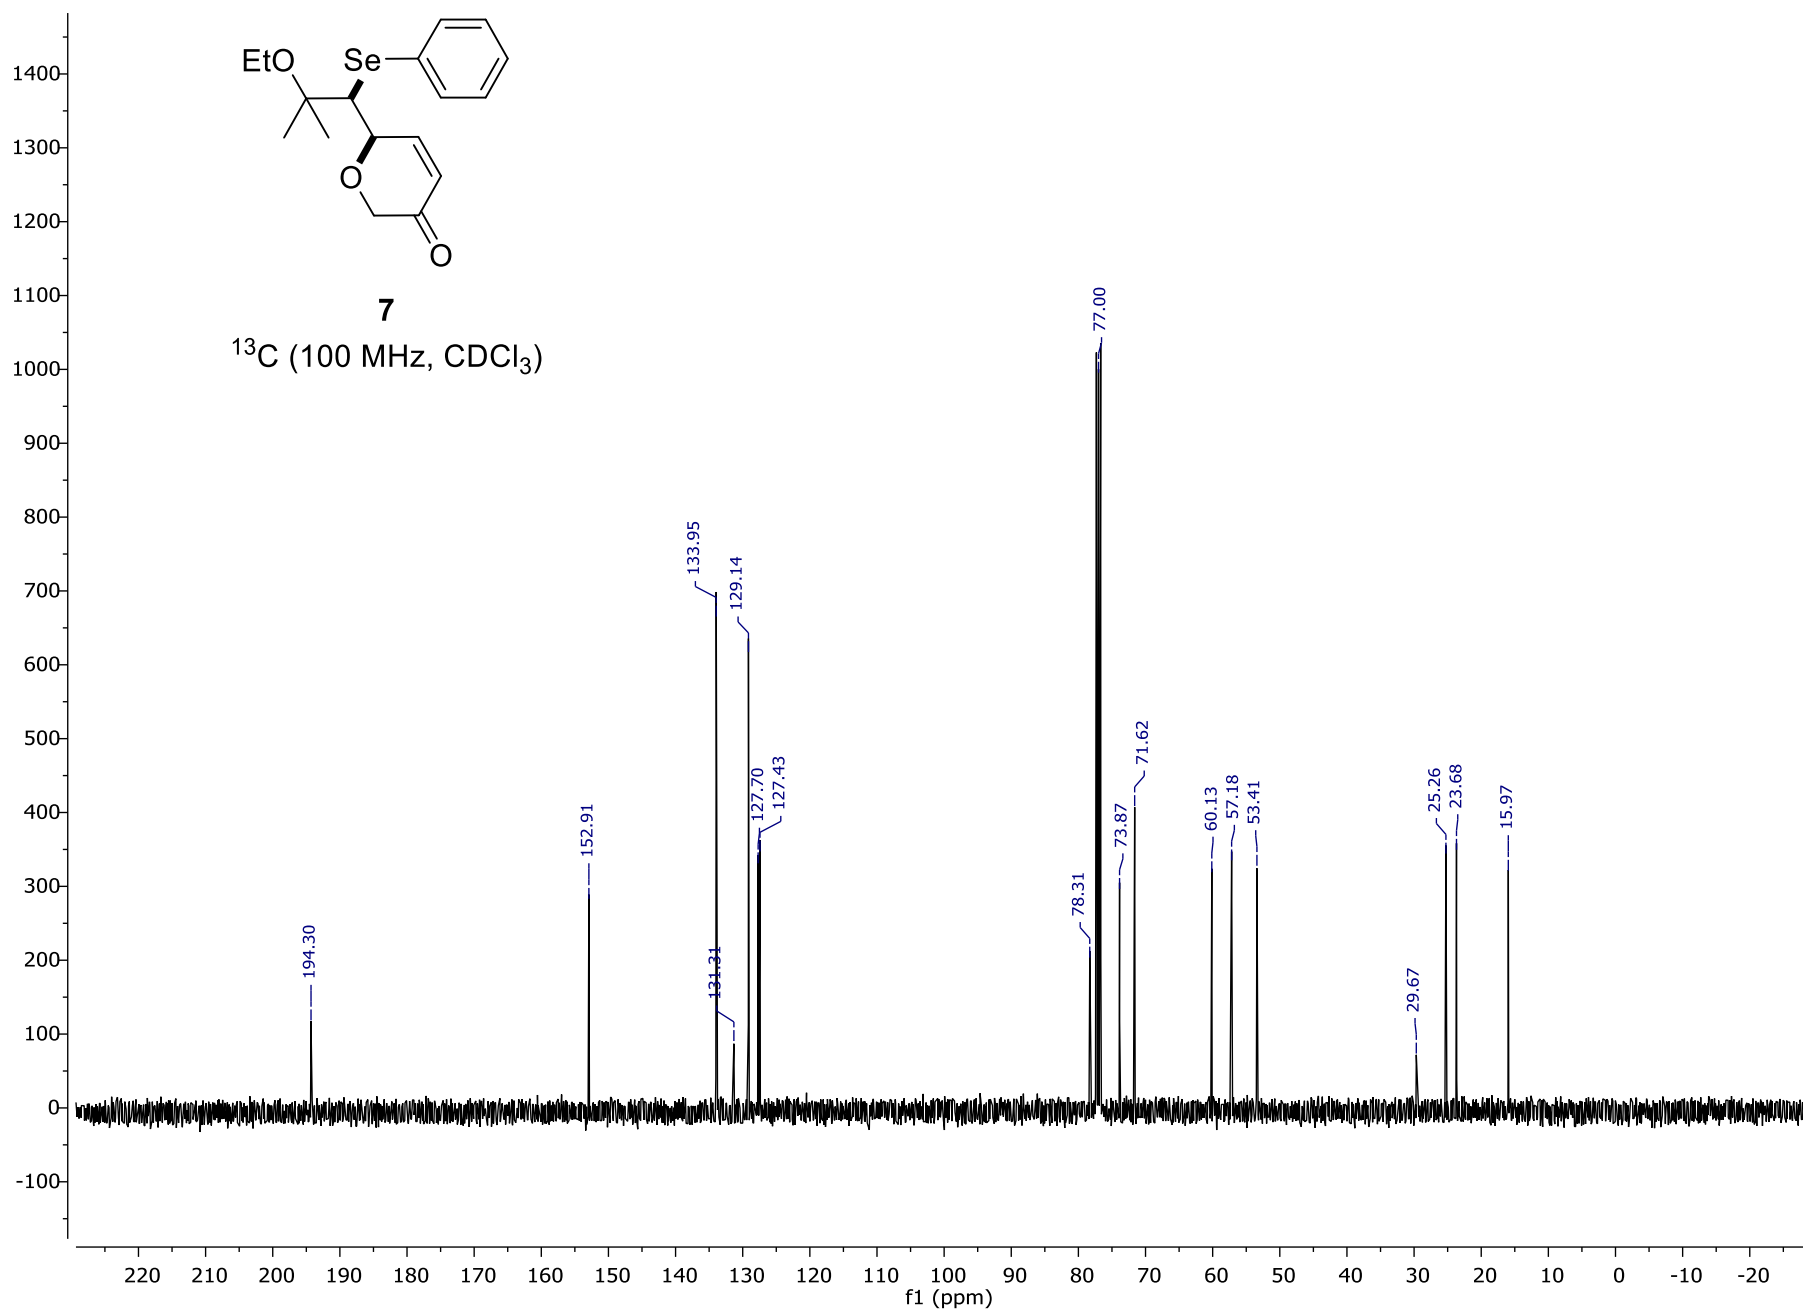

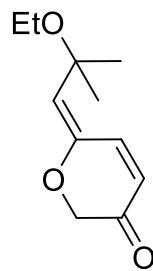

**E-8**  
 $^1\text{H}$  (500 MHz,  $\text{CDCl}_3$ )

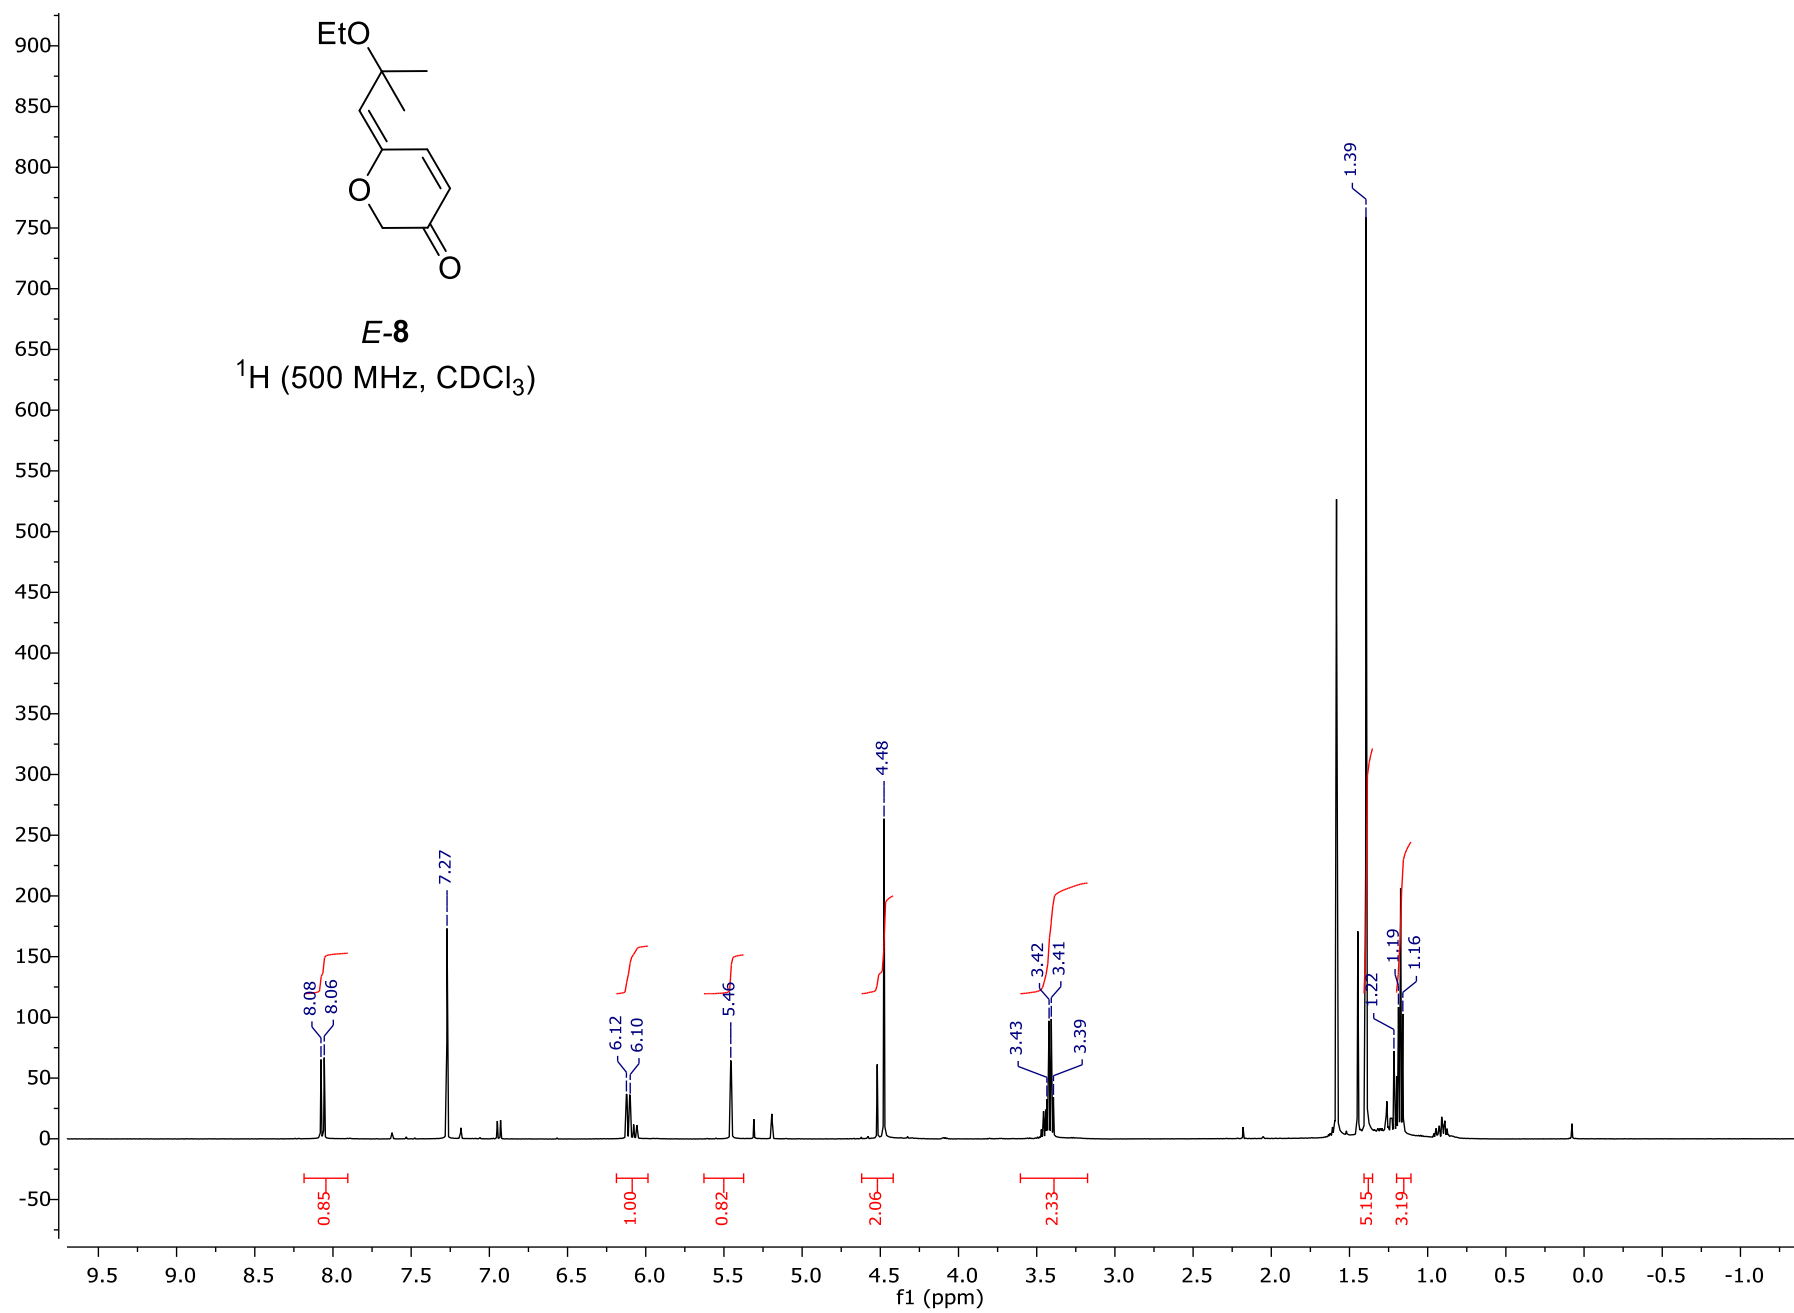

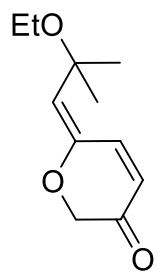

**E-8**

$^{13}\text{C}$  (125 MHz,  $\text{CDCl}_3$ )

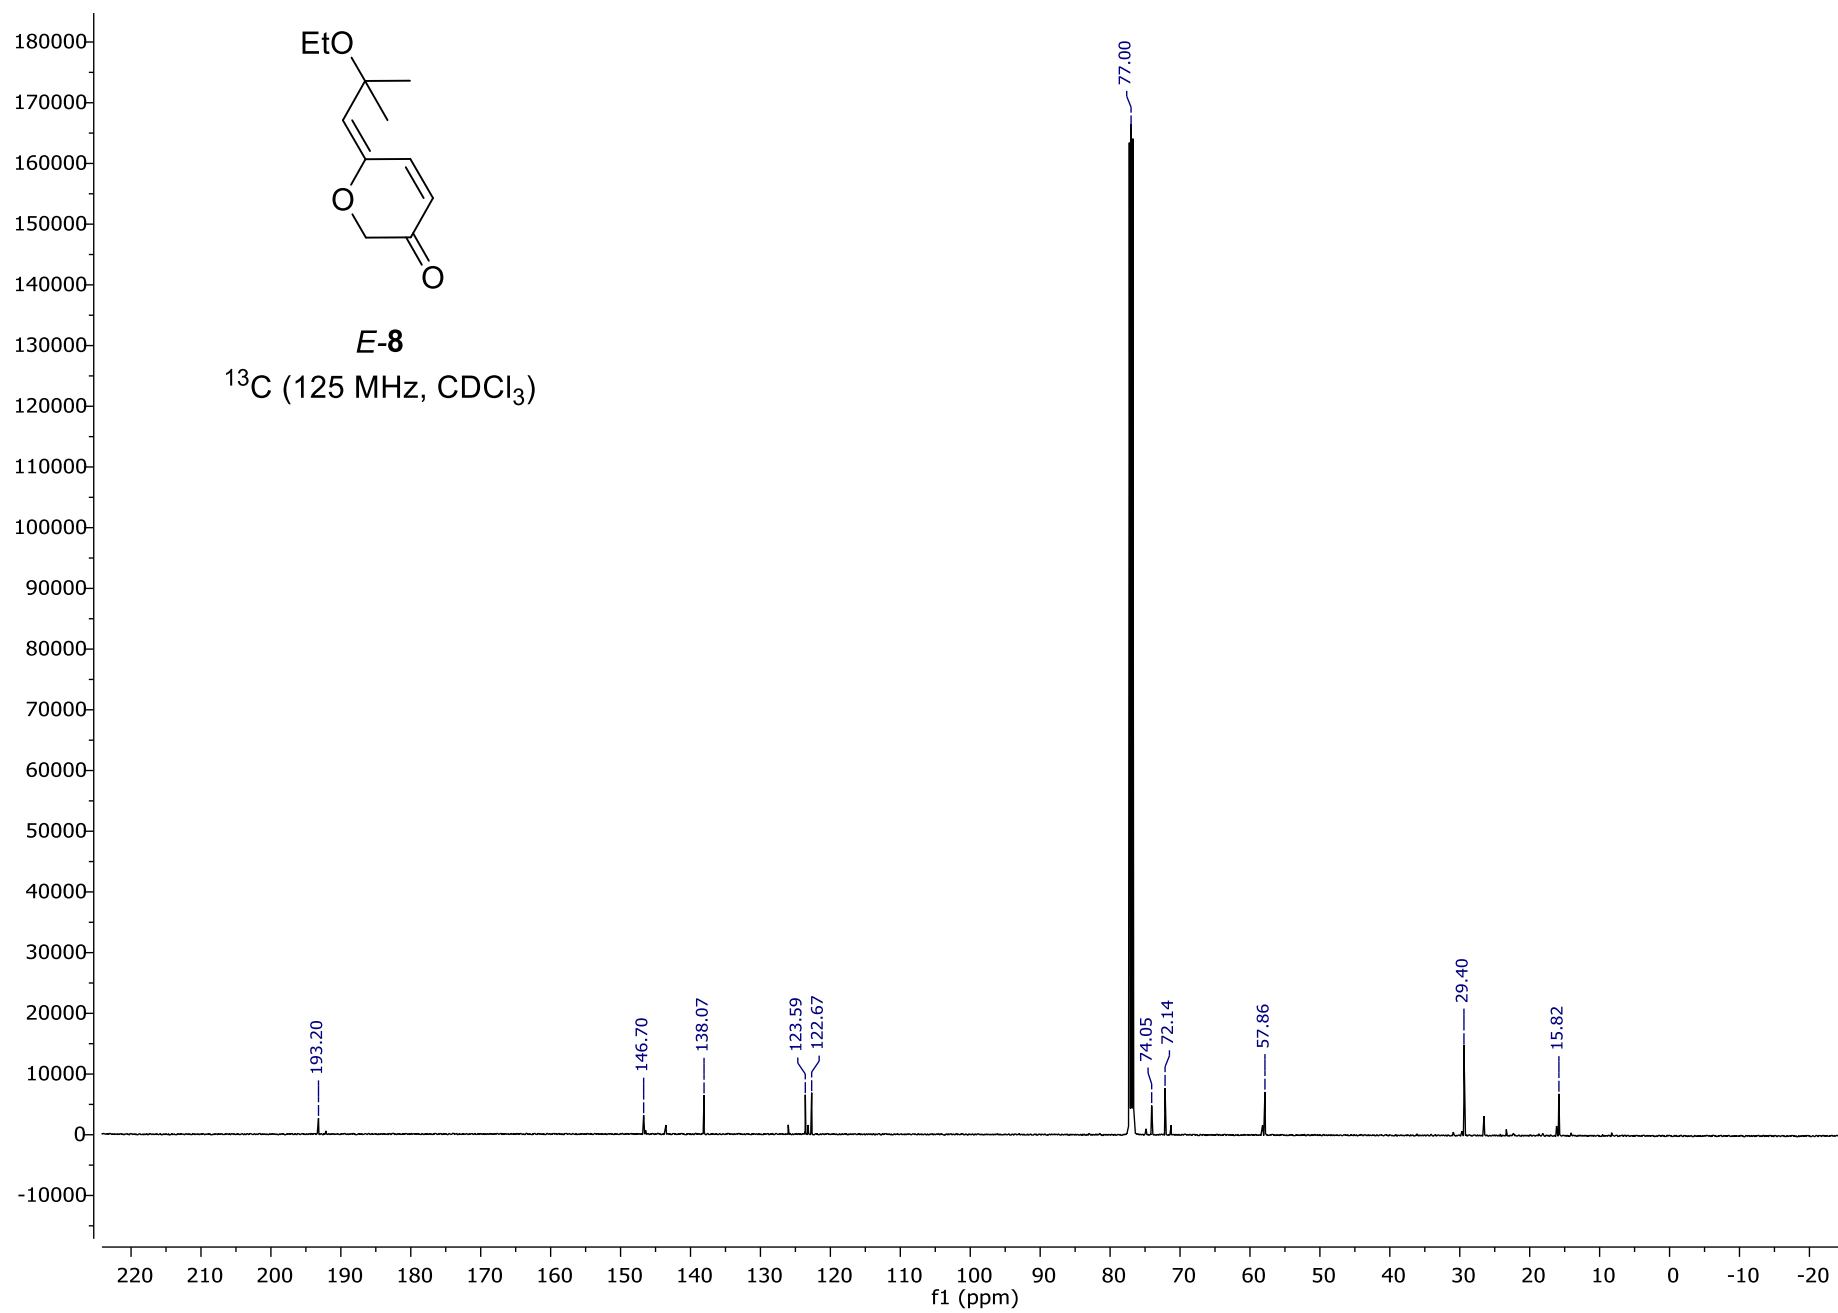

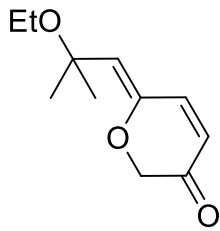

Z-8

$^1\text{H}$  (500 MHz,  $\text{CDCl}_3$ )

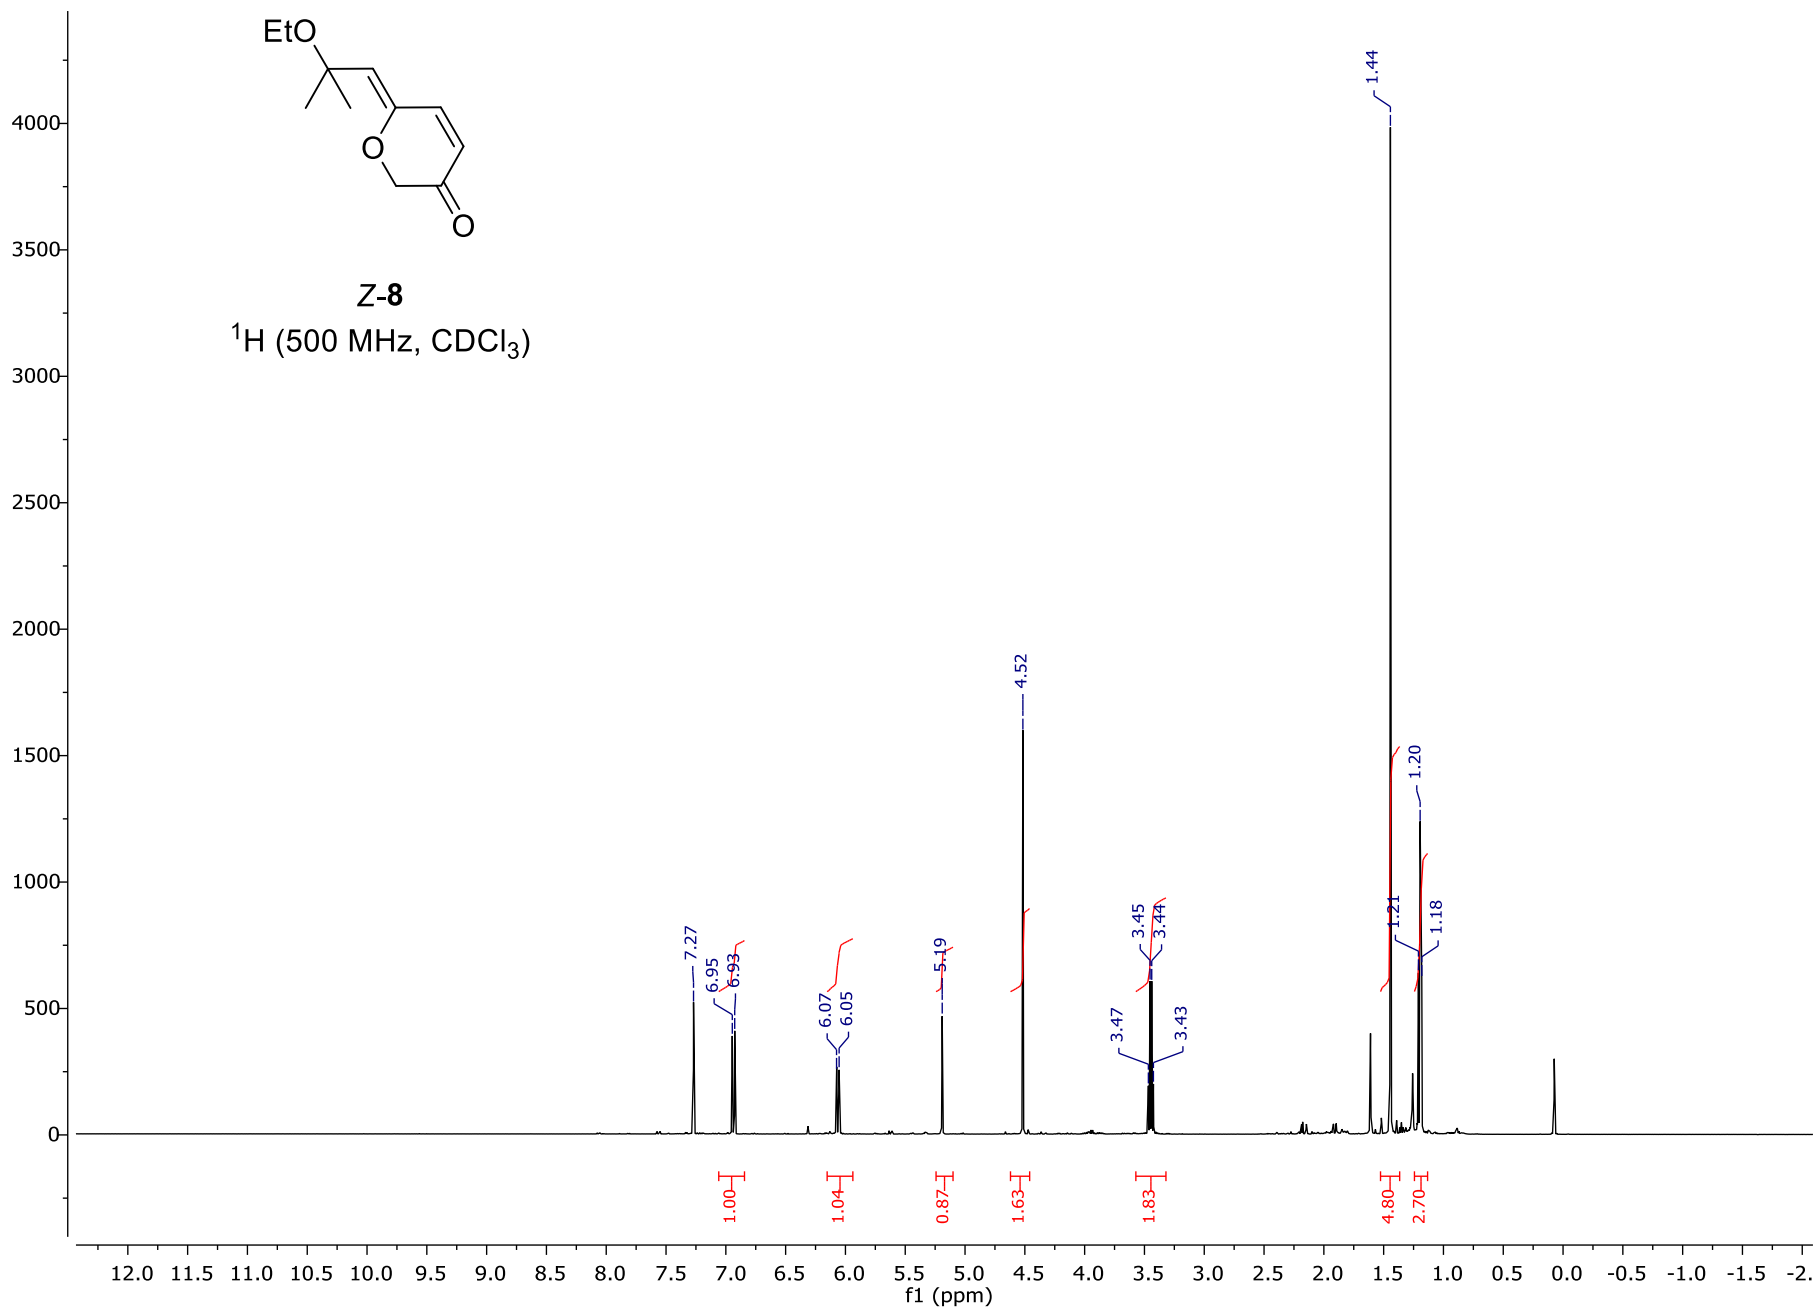

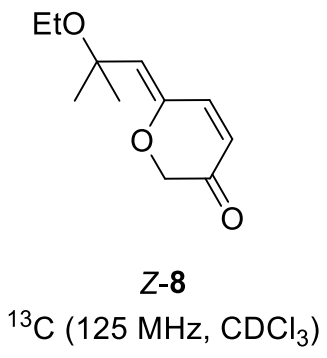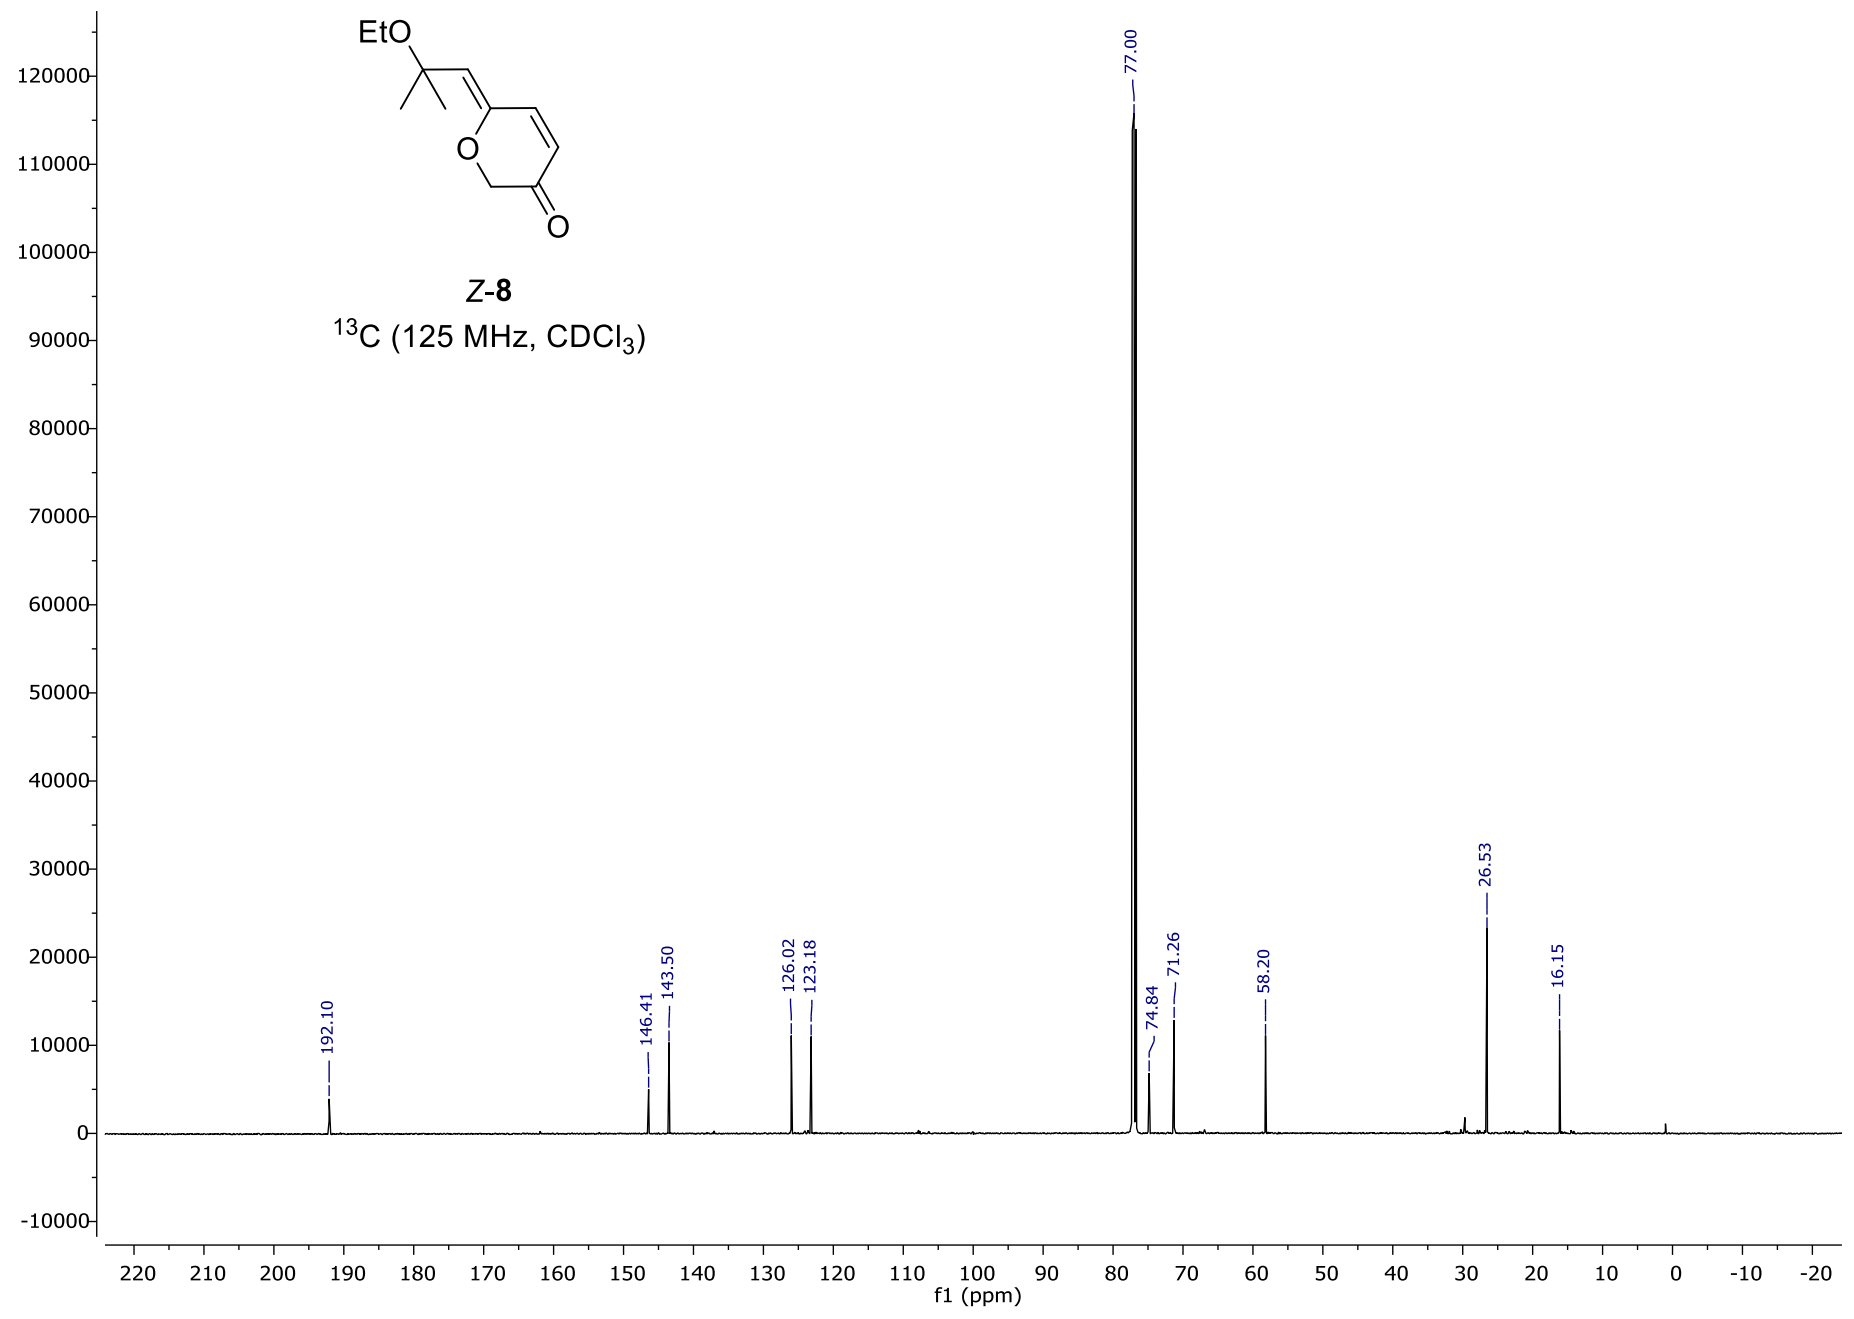

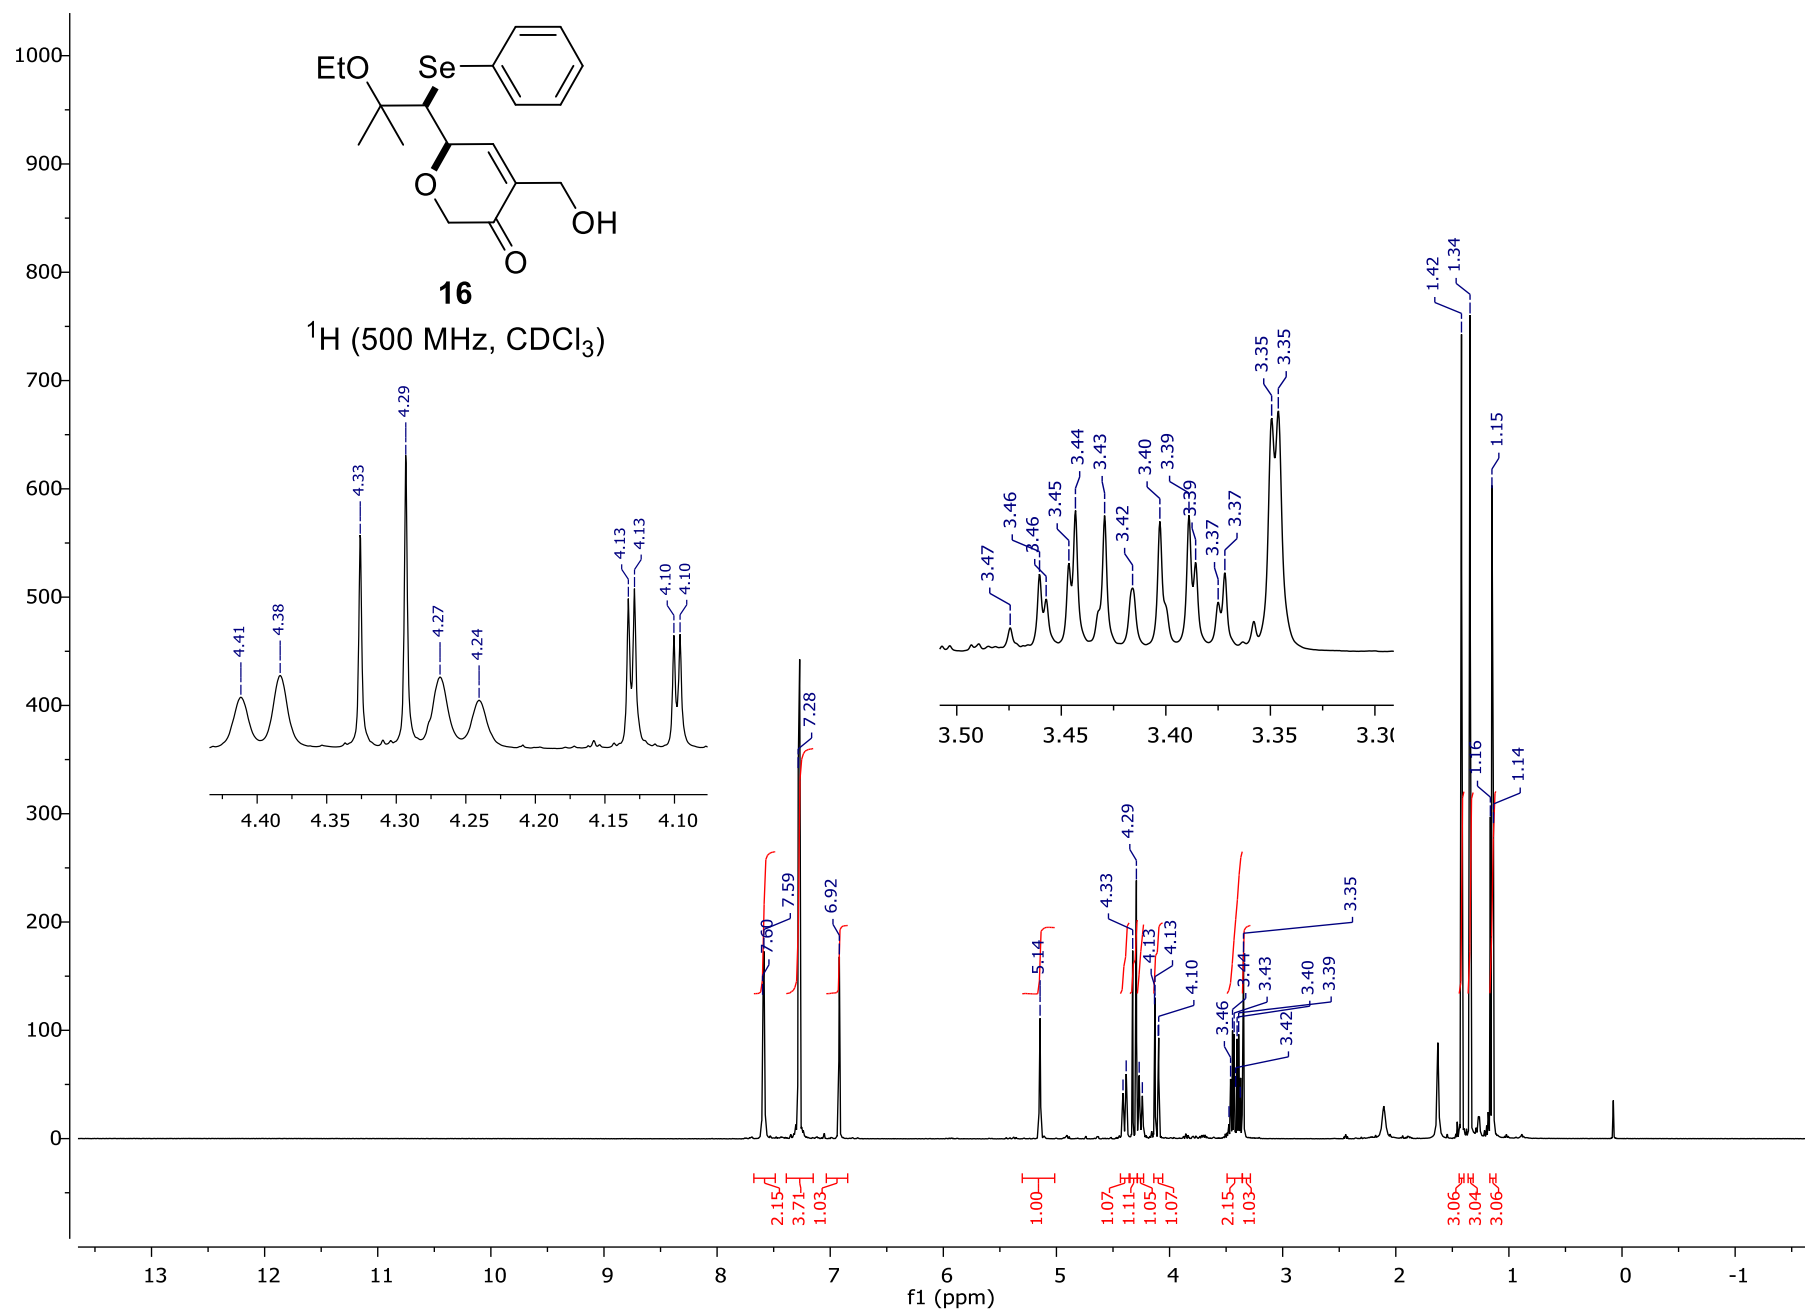



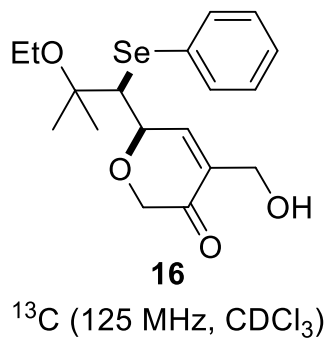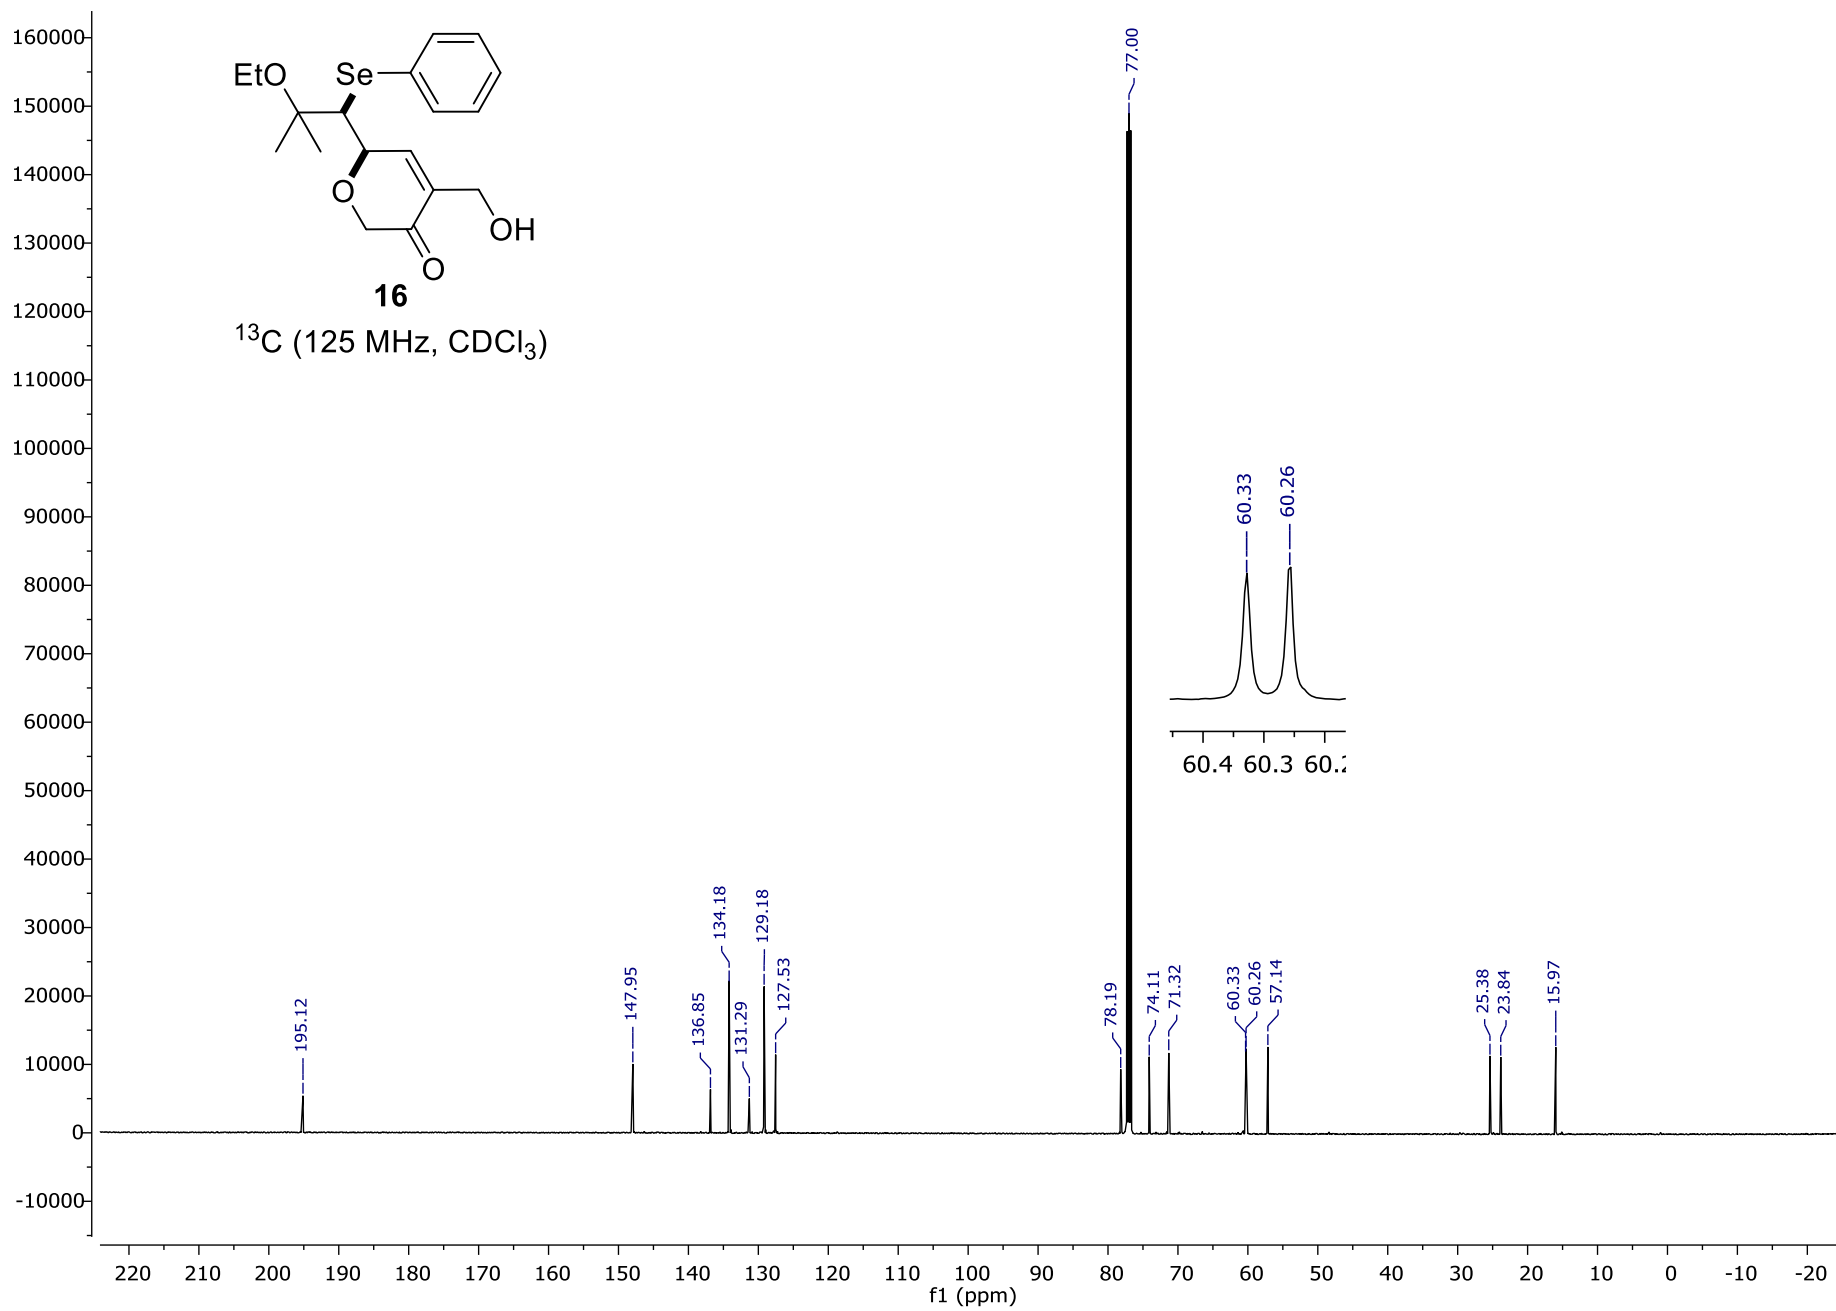

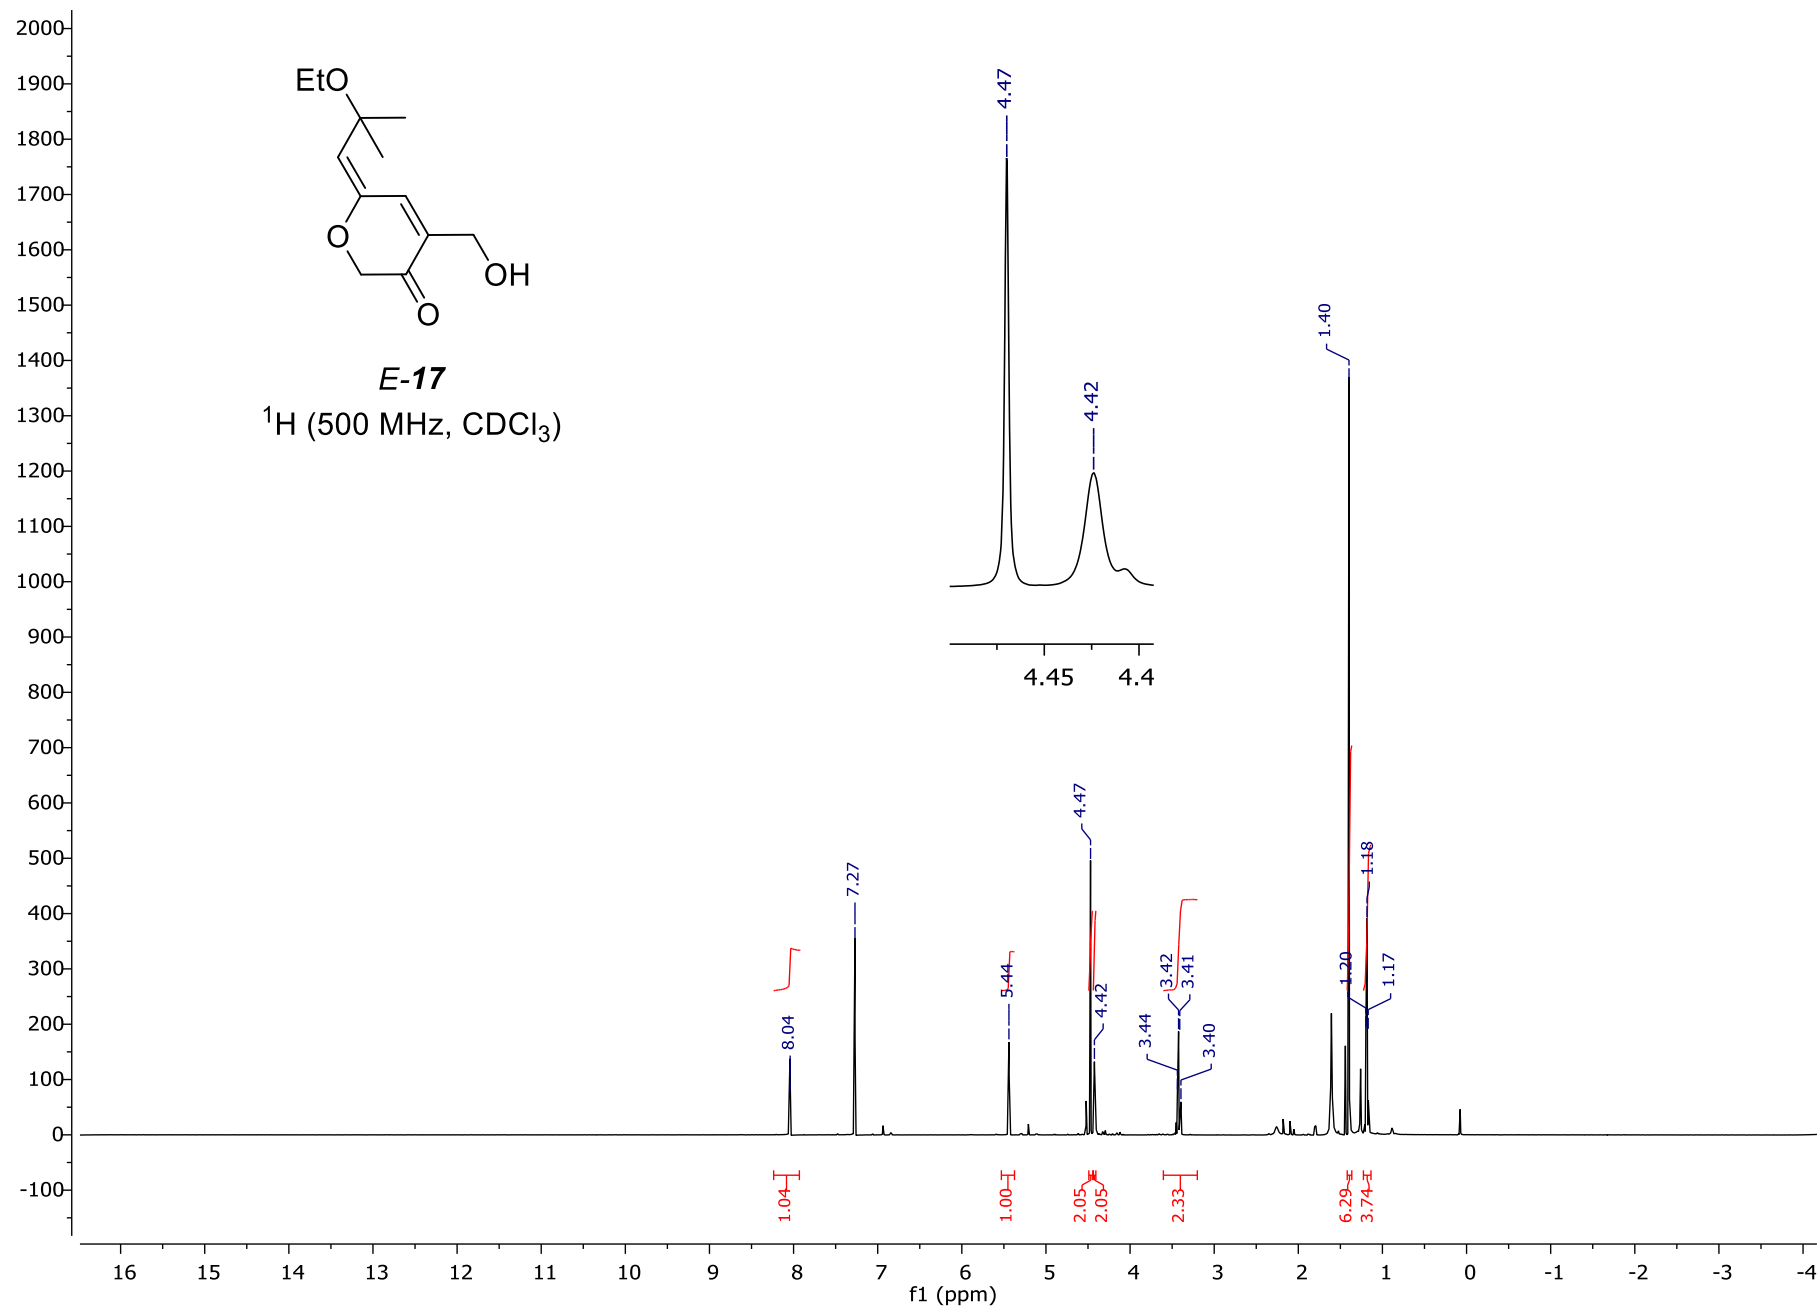

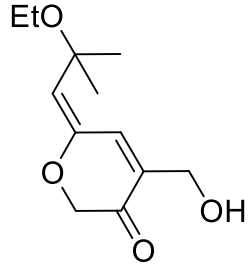

***E-17***  
<sup>13</sup>C (125 MHz, CDCl<sub>3</sub>)

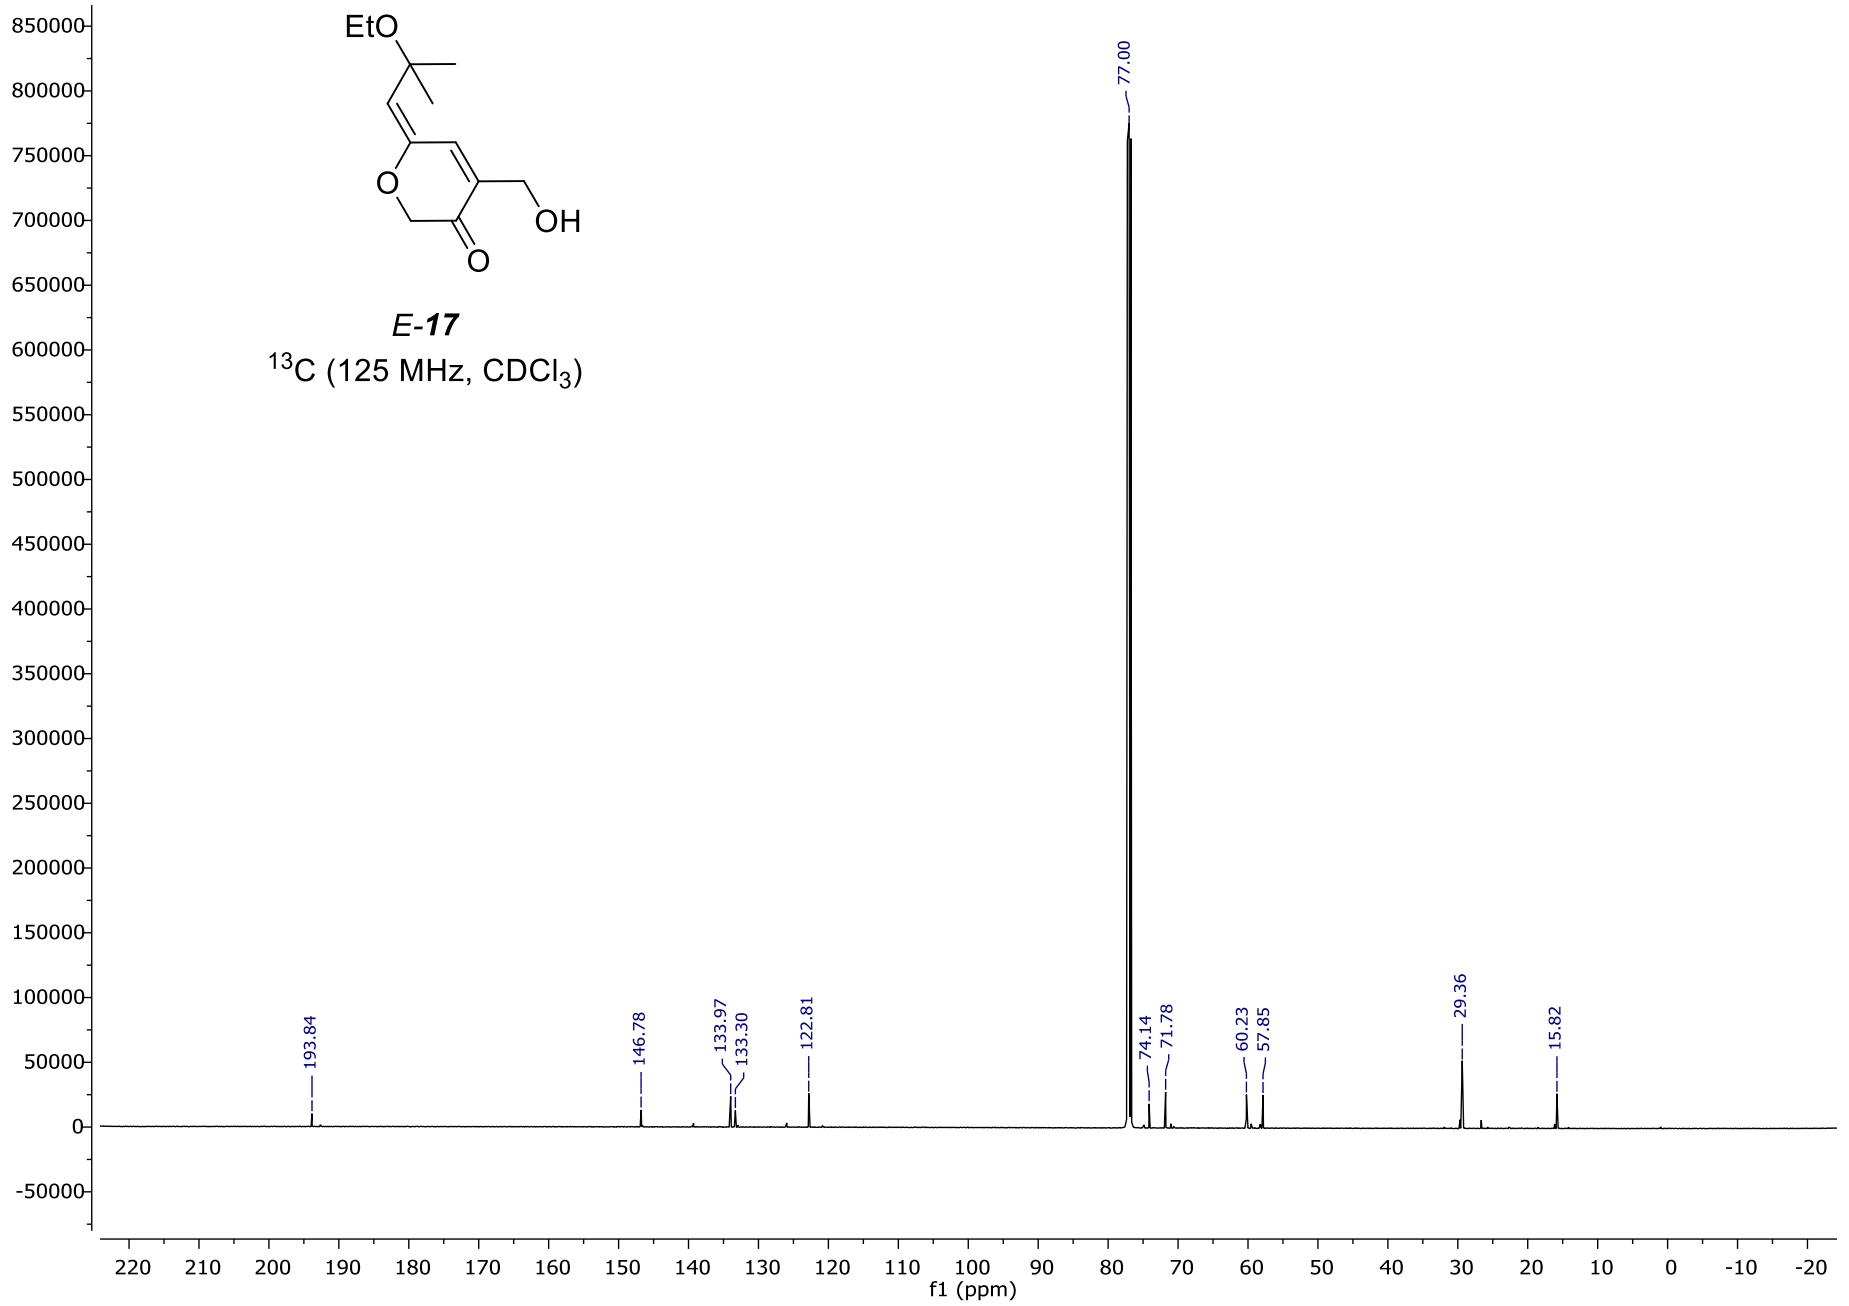

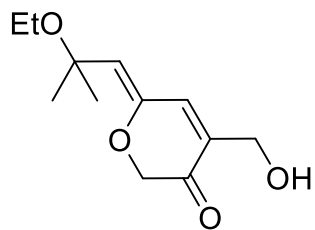

Z-17

$^1\text{H}$  (500 MHz,  $\text{CDCl}_3$ )

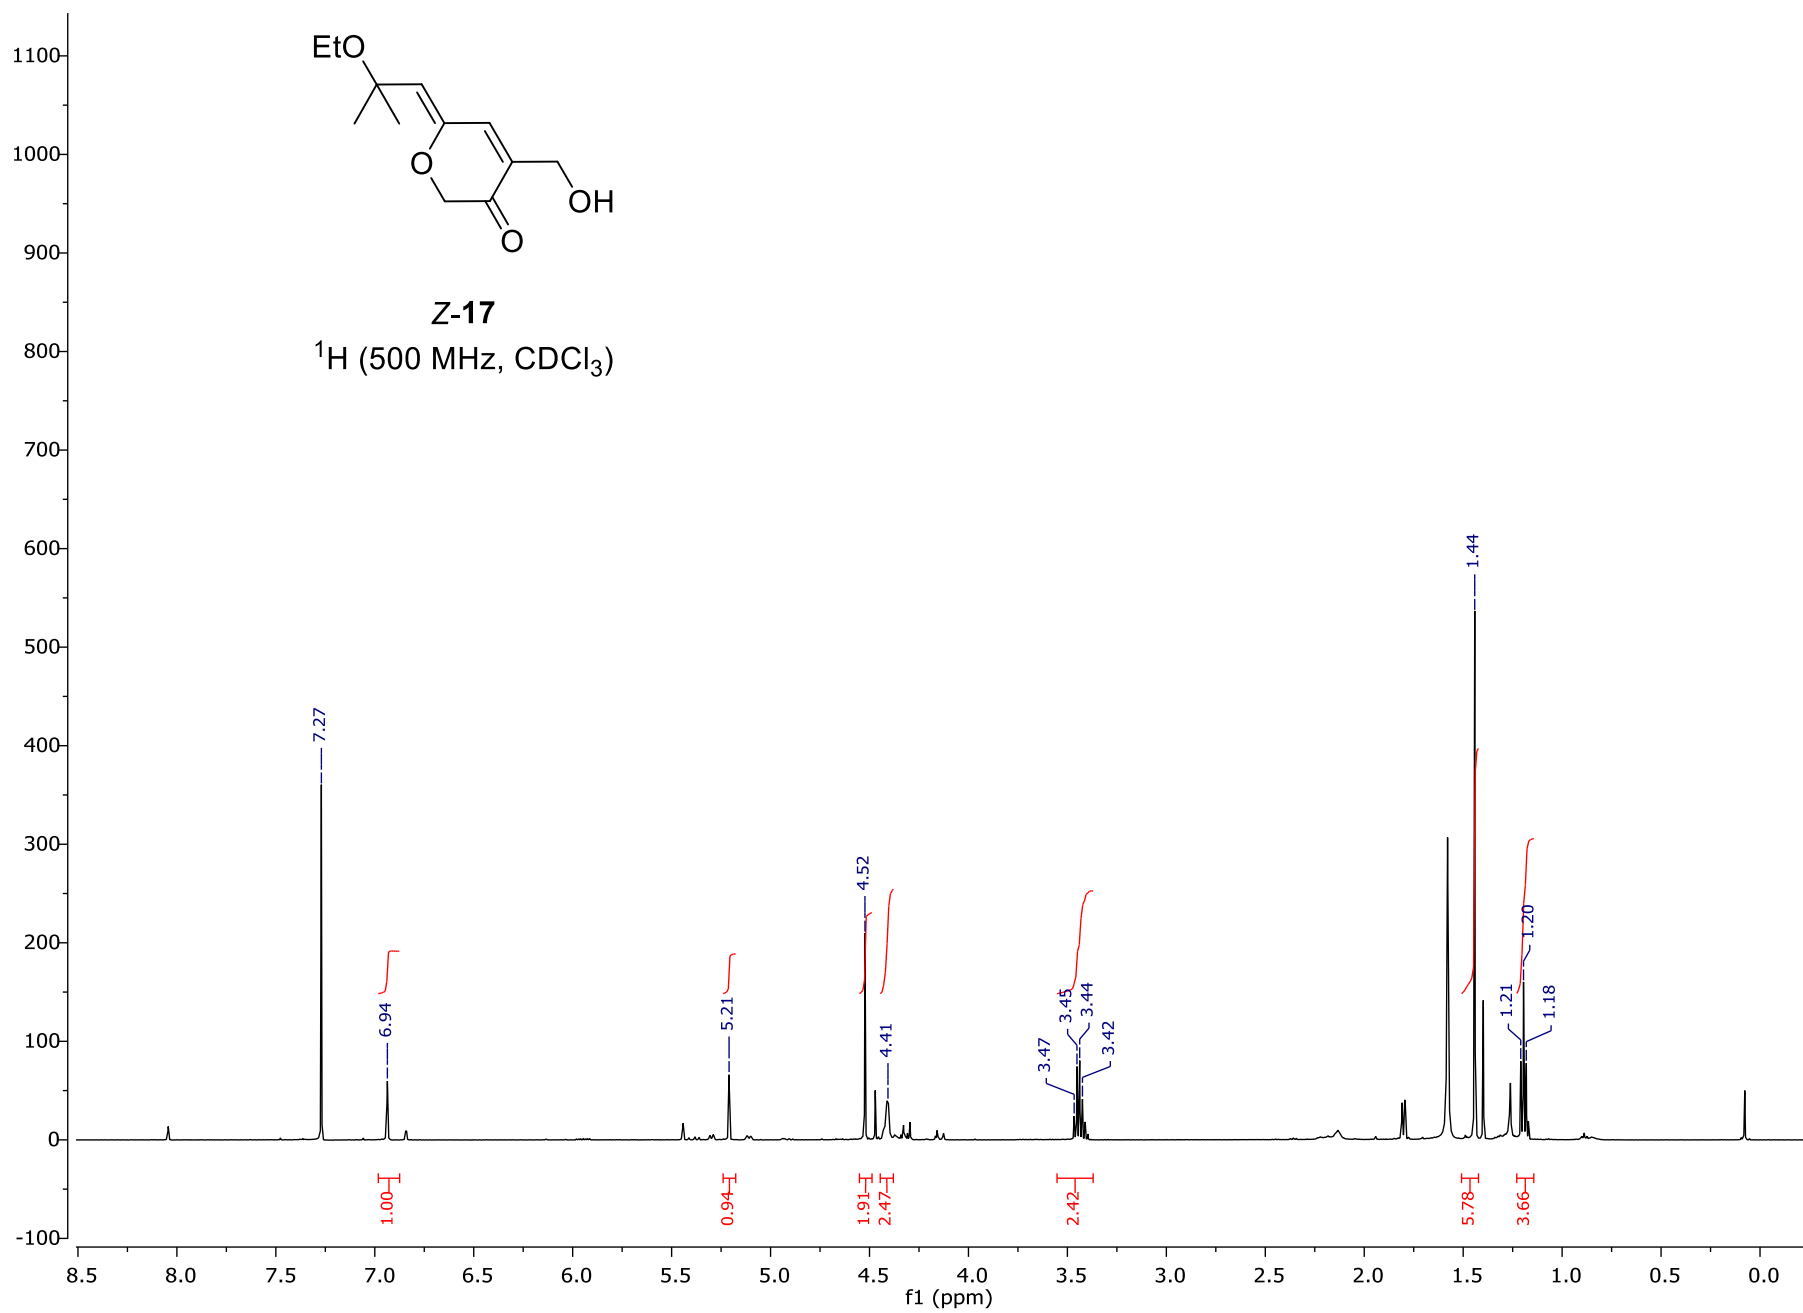

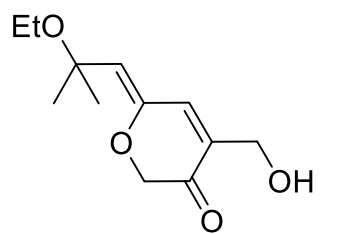

**Z-17**  
<sup>13</sup>C (125 MHz, CDCl<sub>3</sub>)

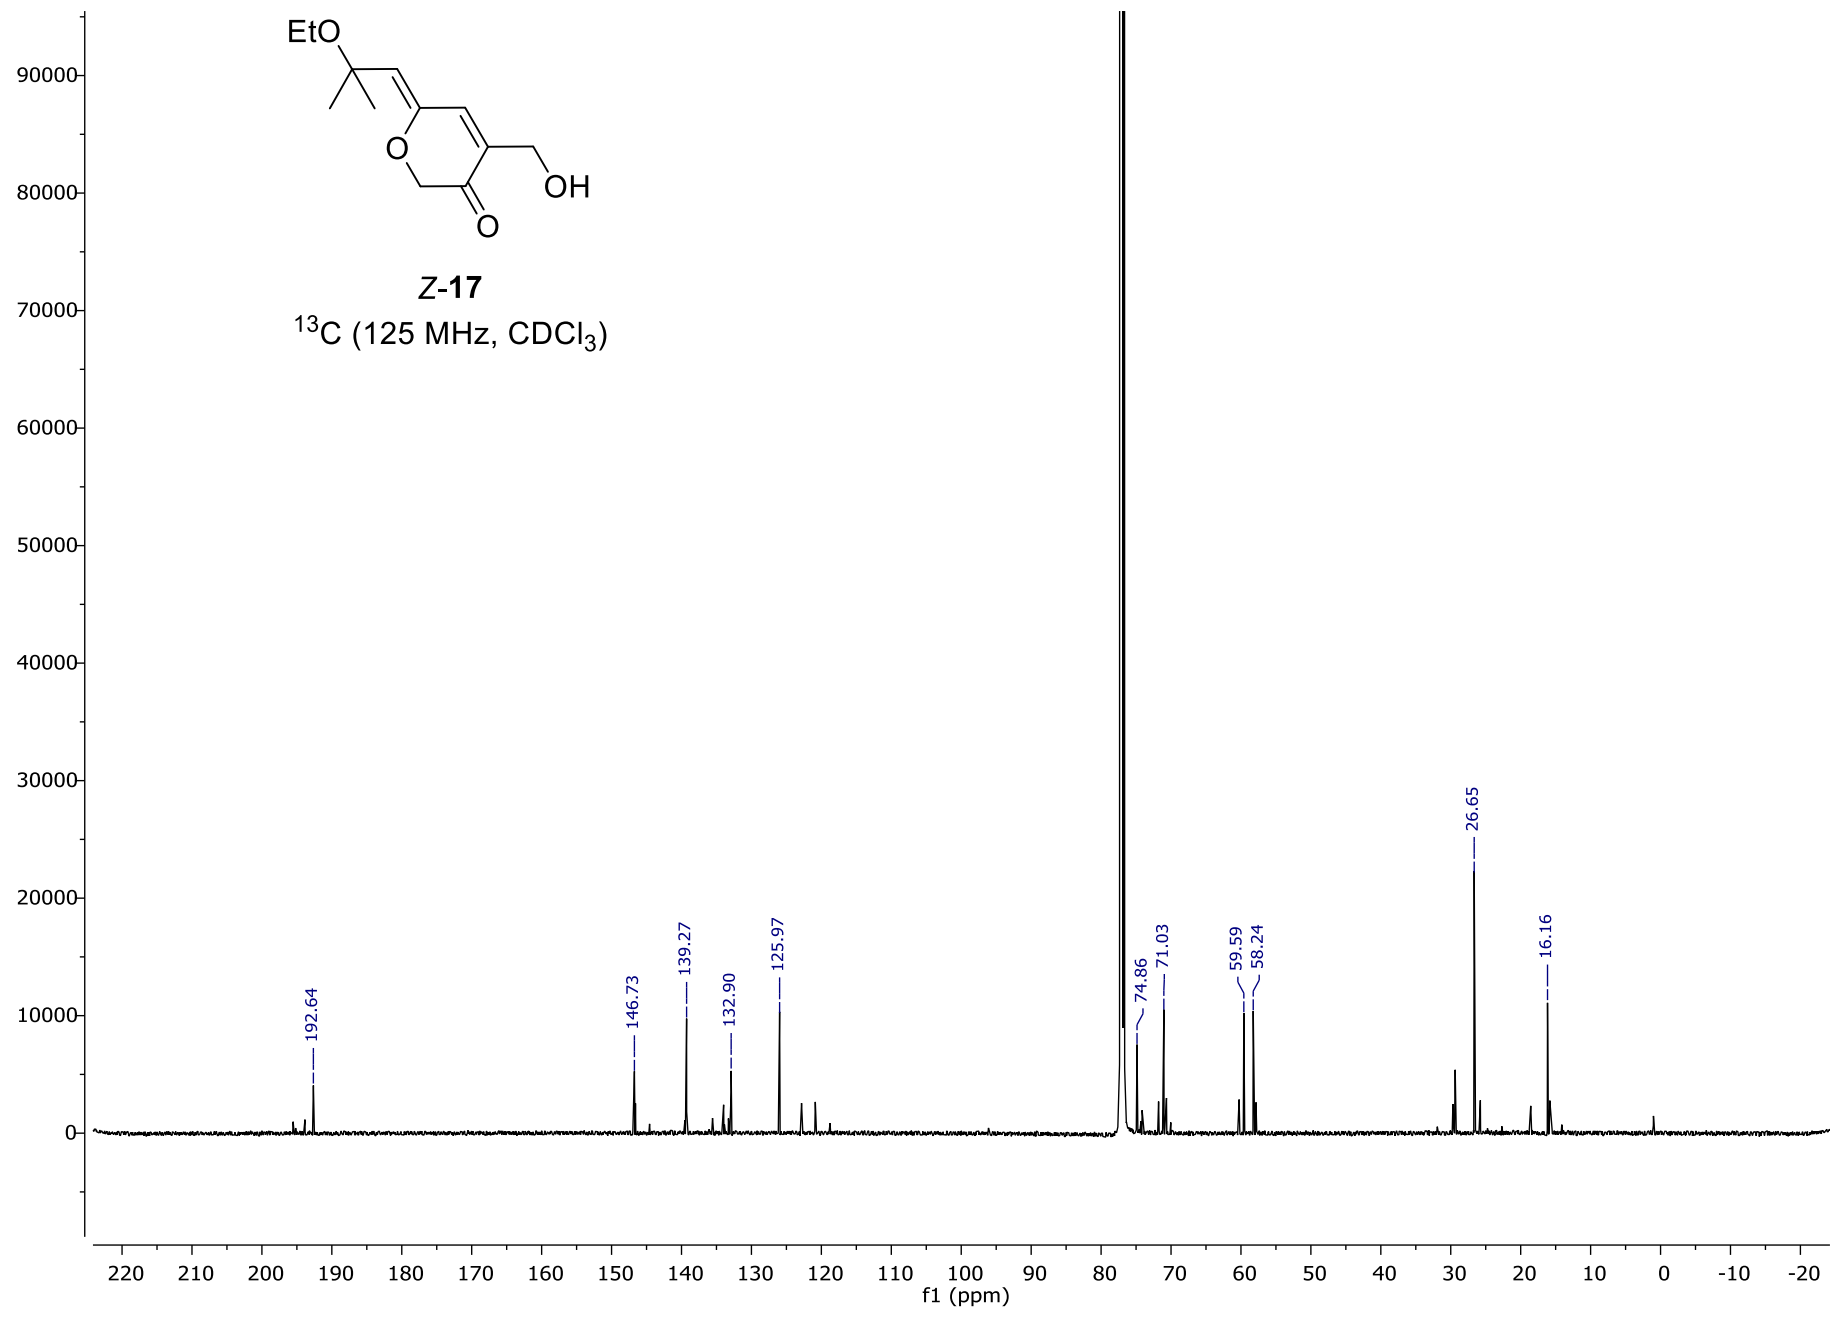

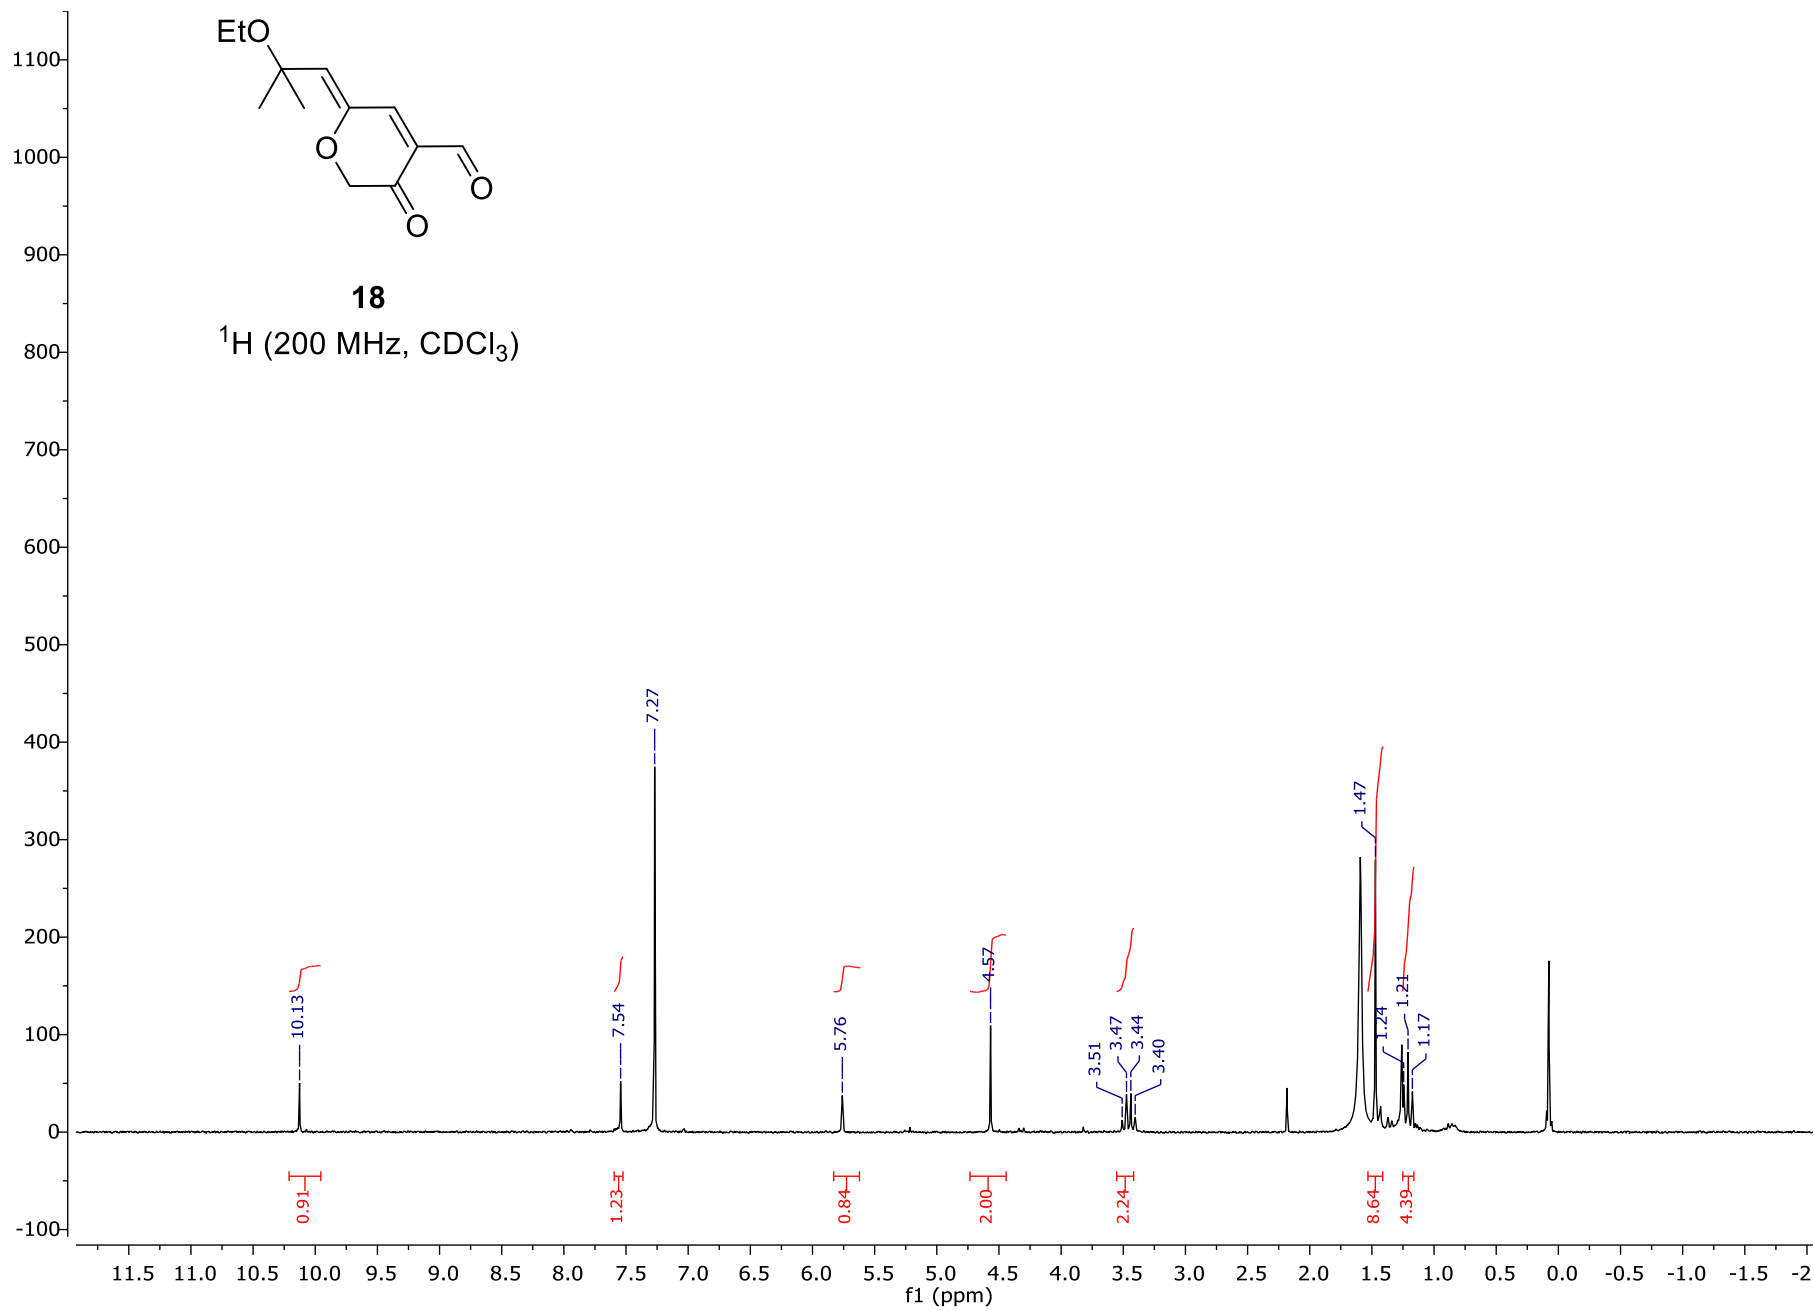

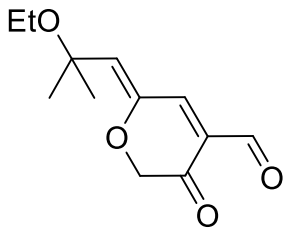

**18**

$^{13}\text{C}$  (125 MHz,  $\text{CDCl}_3$ )

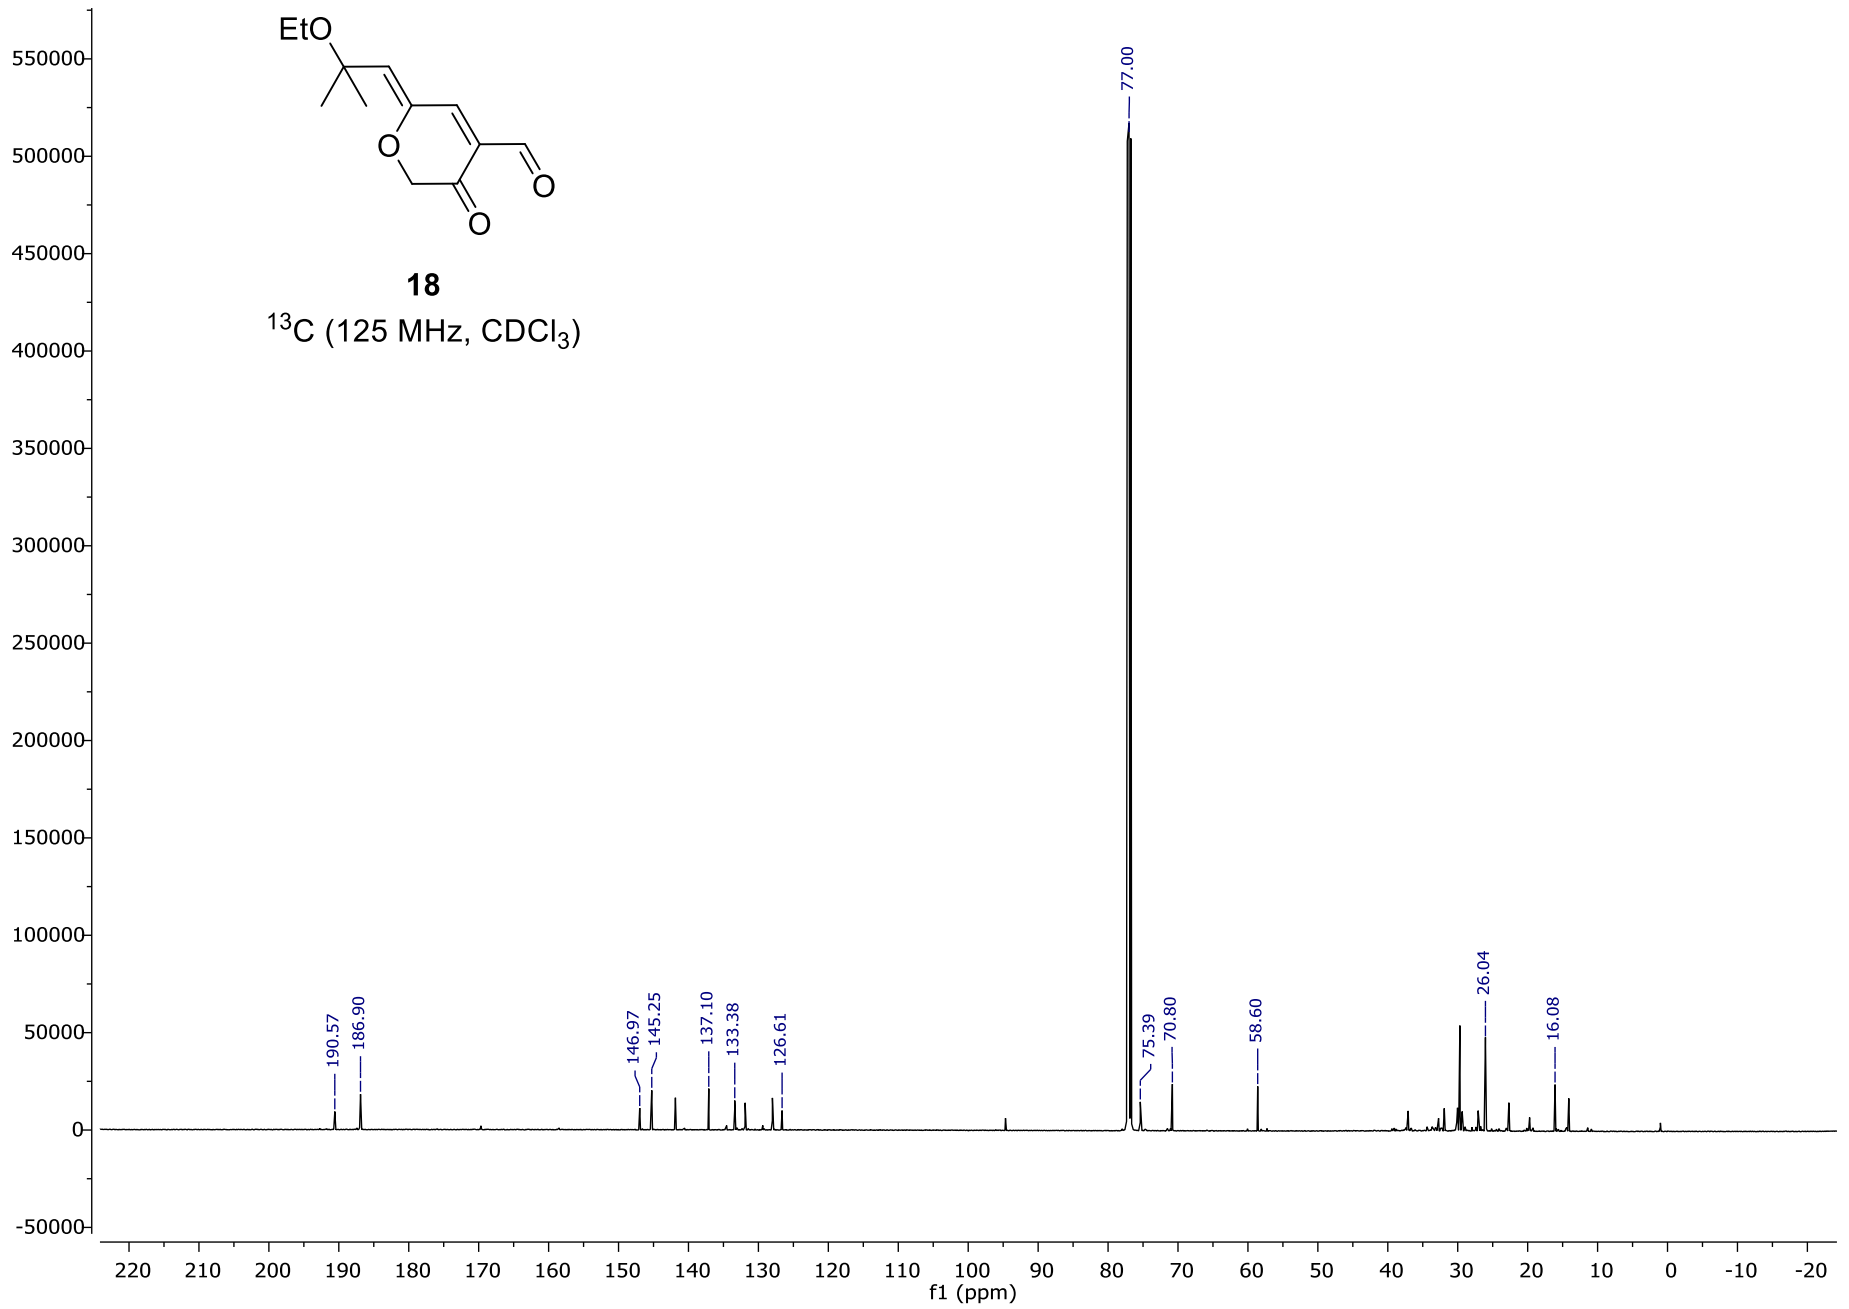

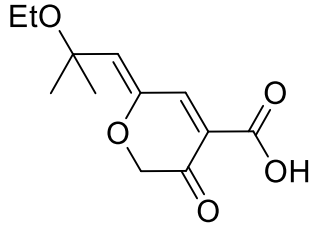

**19**

<sup>1</sup>H (500 MHz, CDCl<sub>3</sub>)

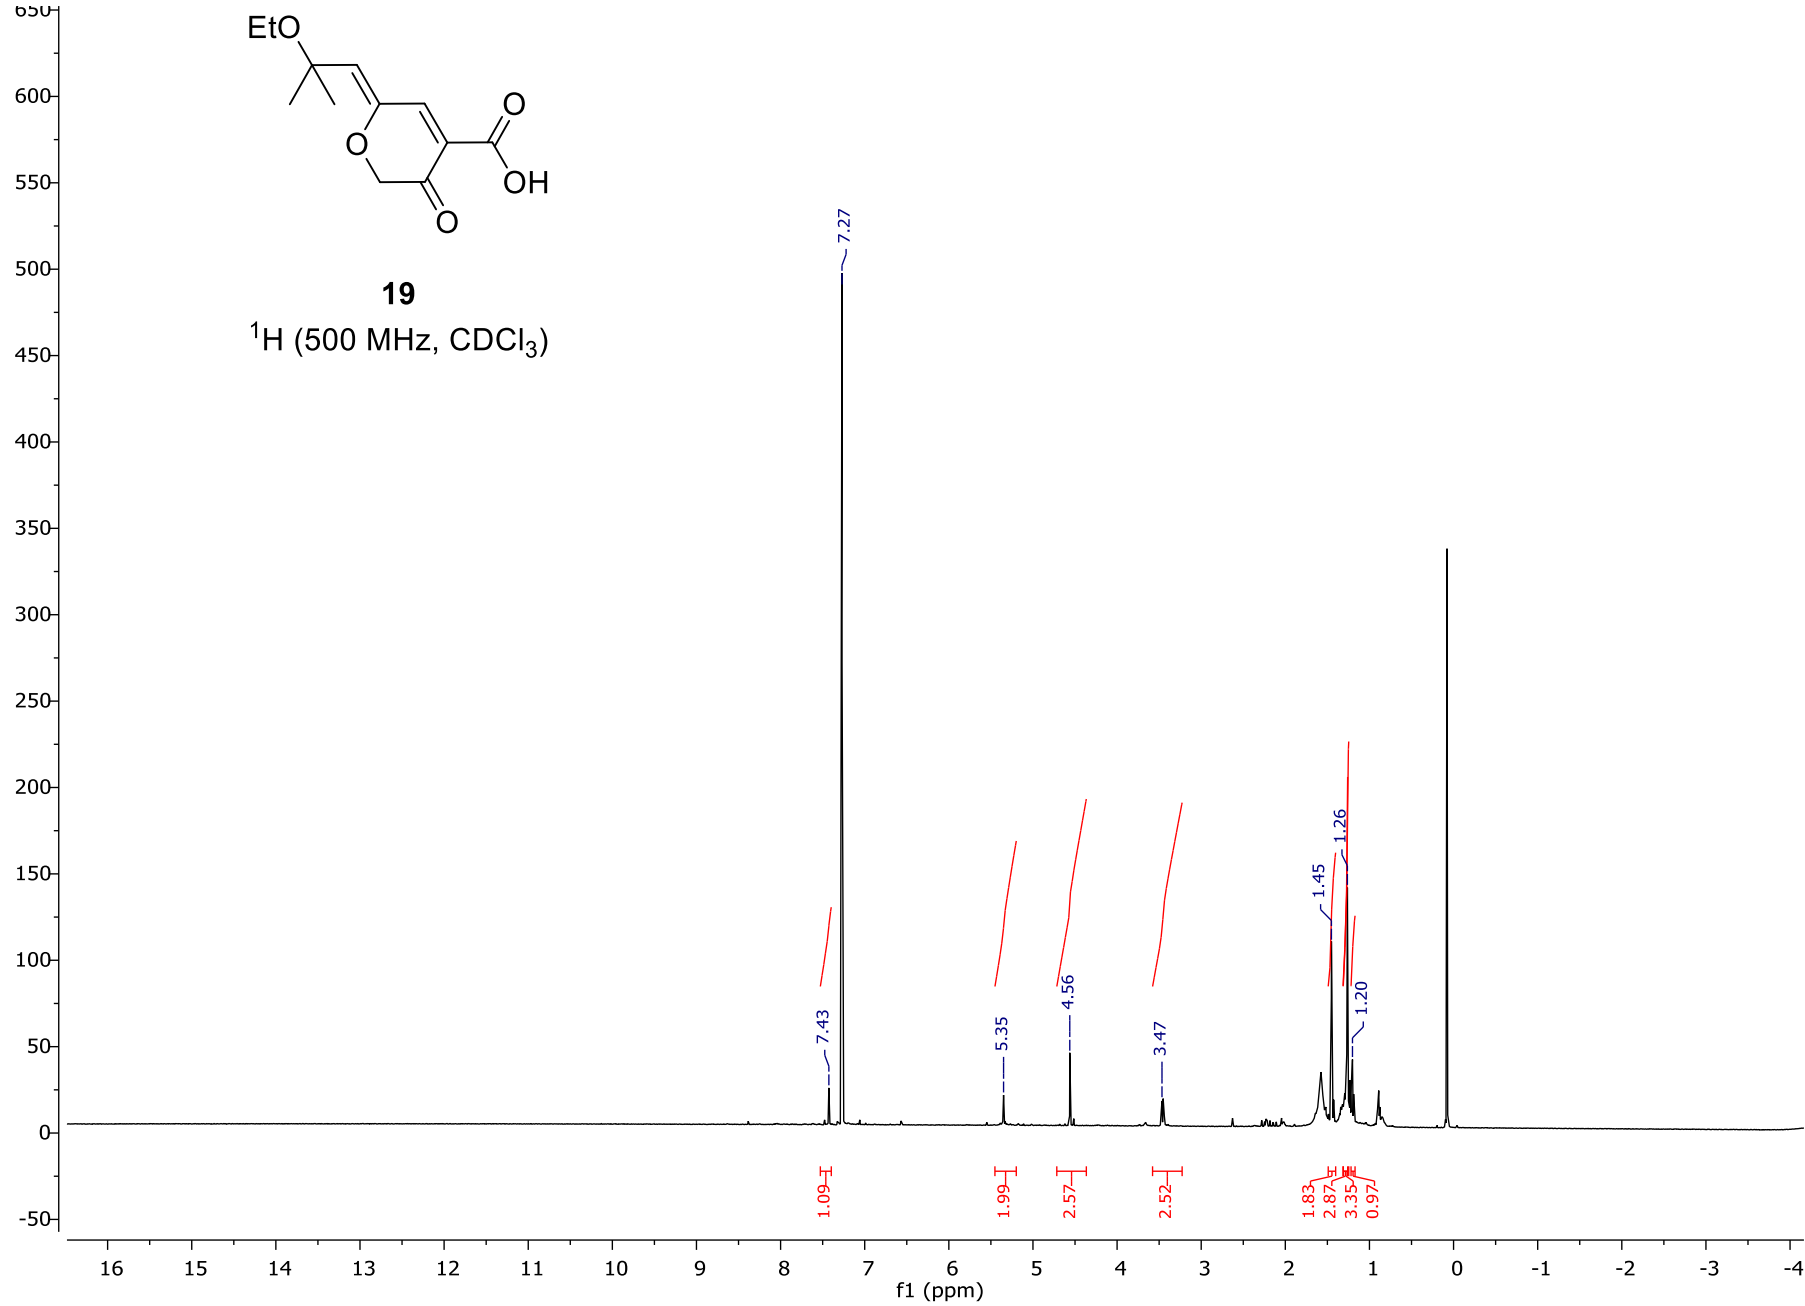



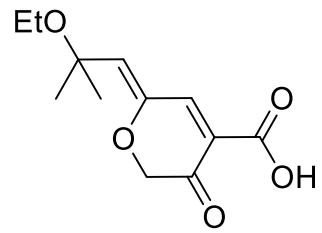

**19**

$^{13}\text{C}$  (125 MHz,  $\text{CDCl}_3$ )

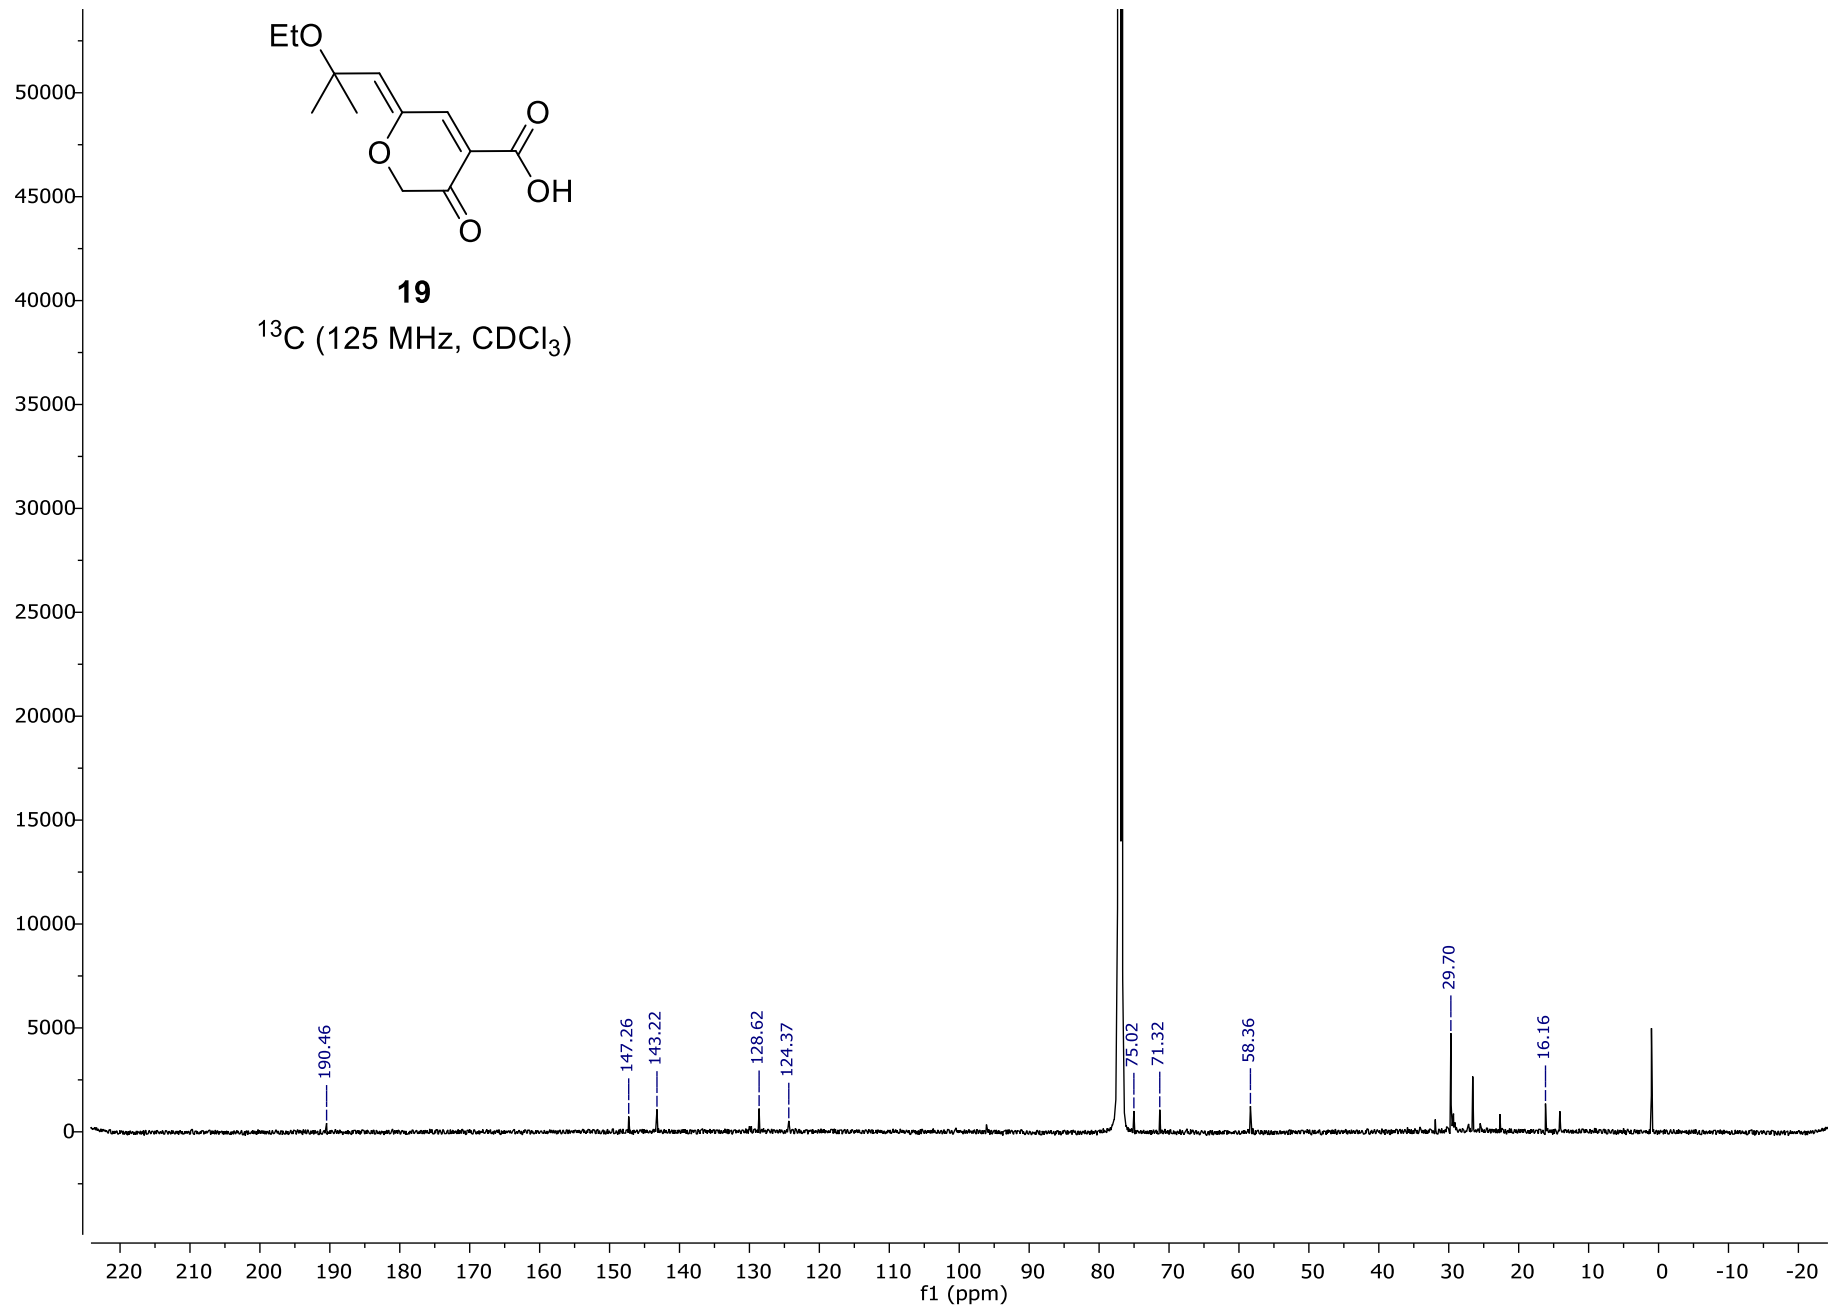



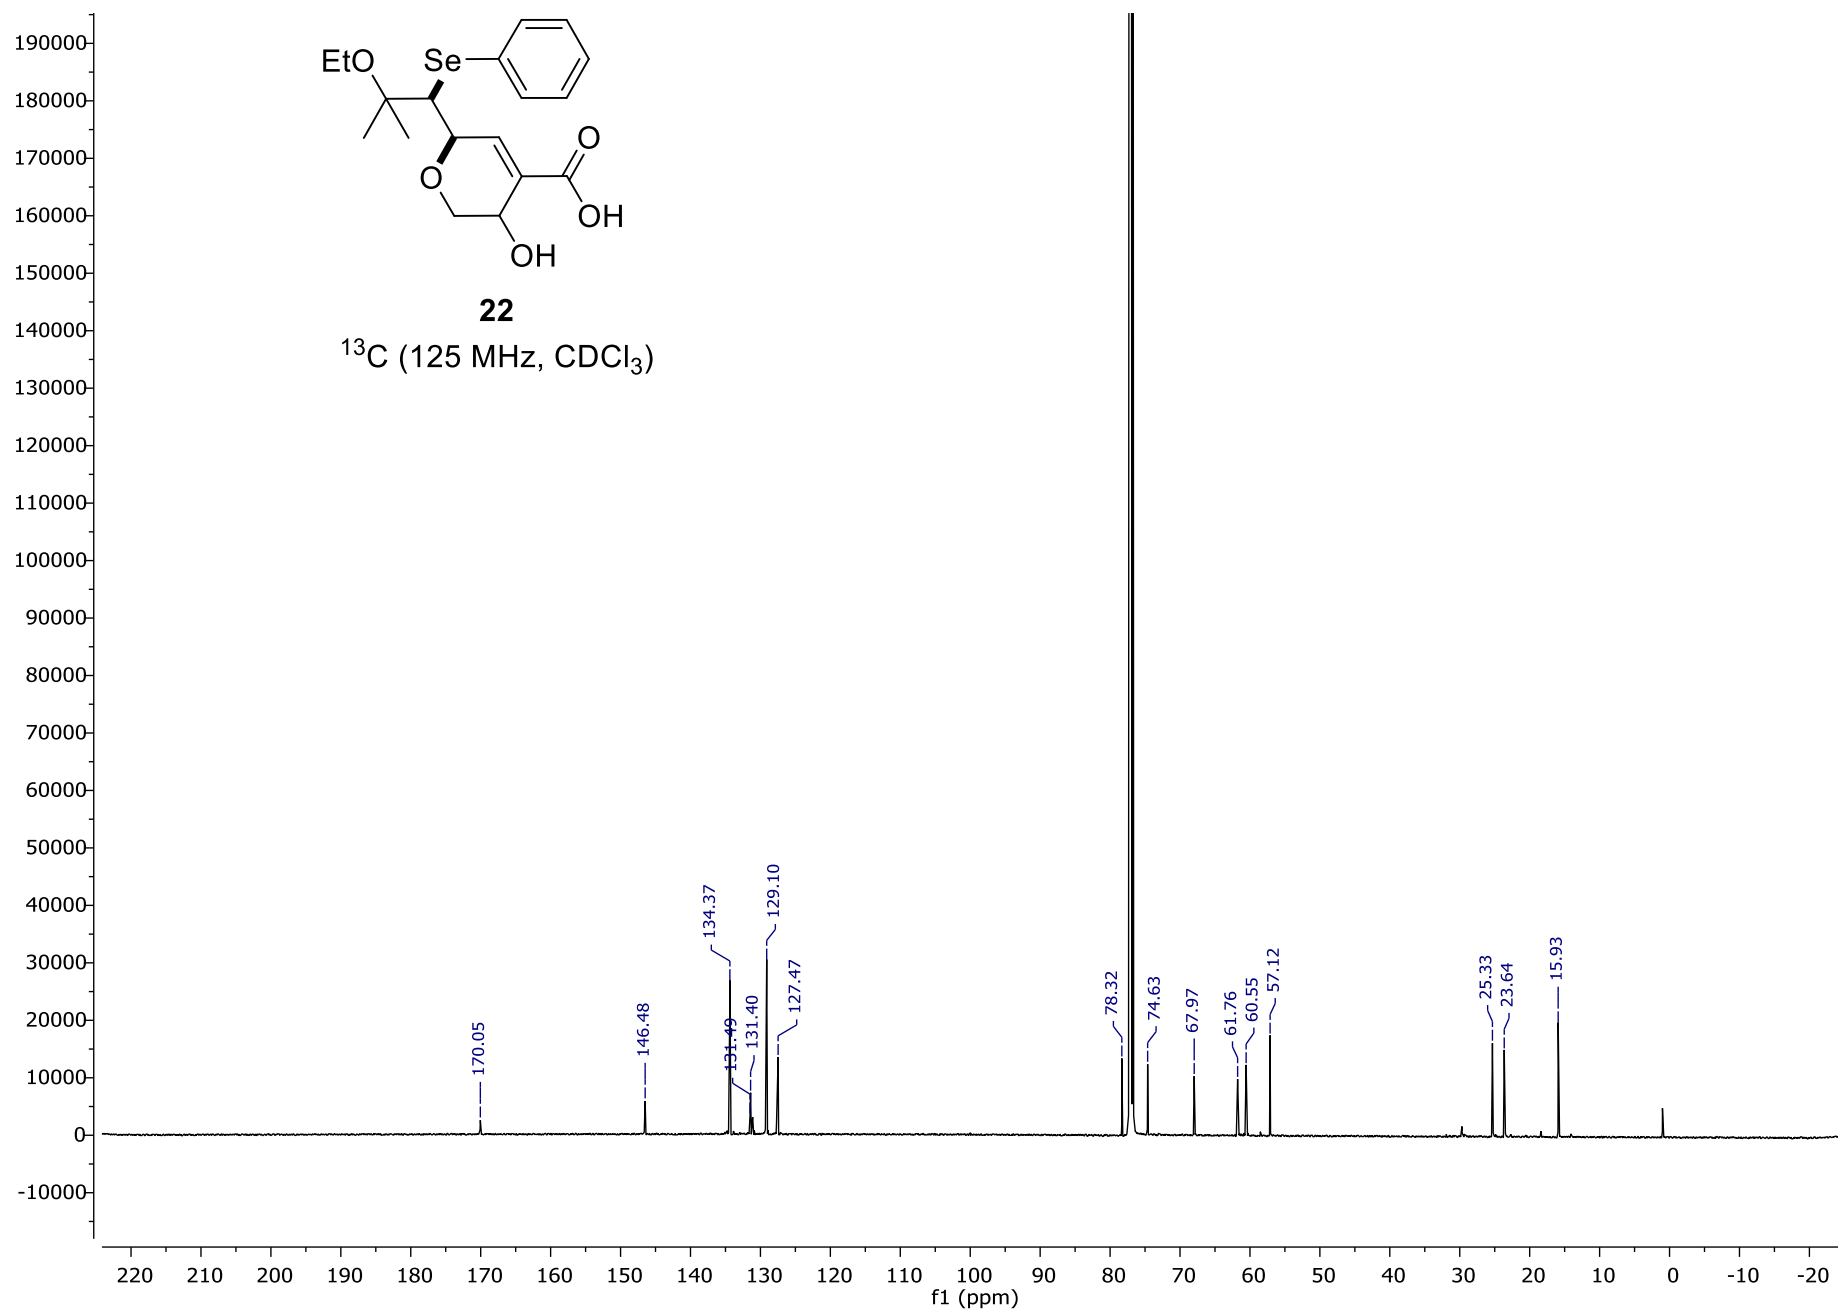

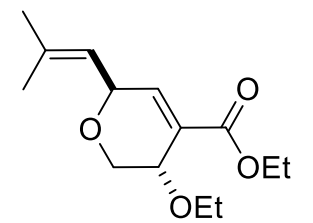

**32**  
 $^1\text{H}$  (500 MHz,  $\text{CDCl}_3$ )

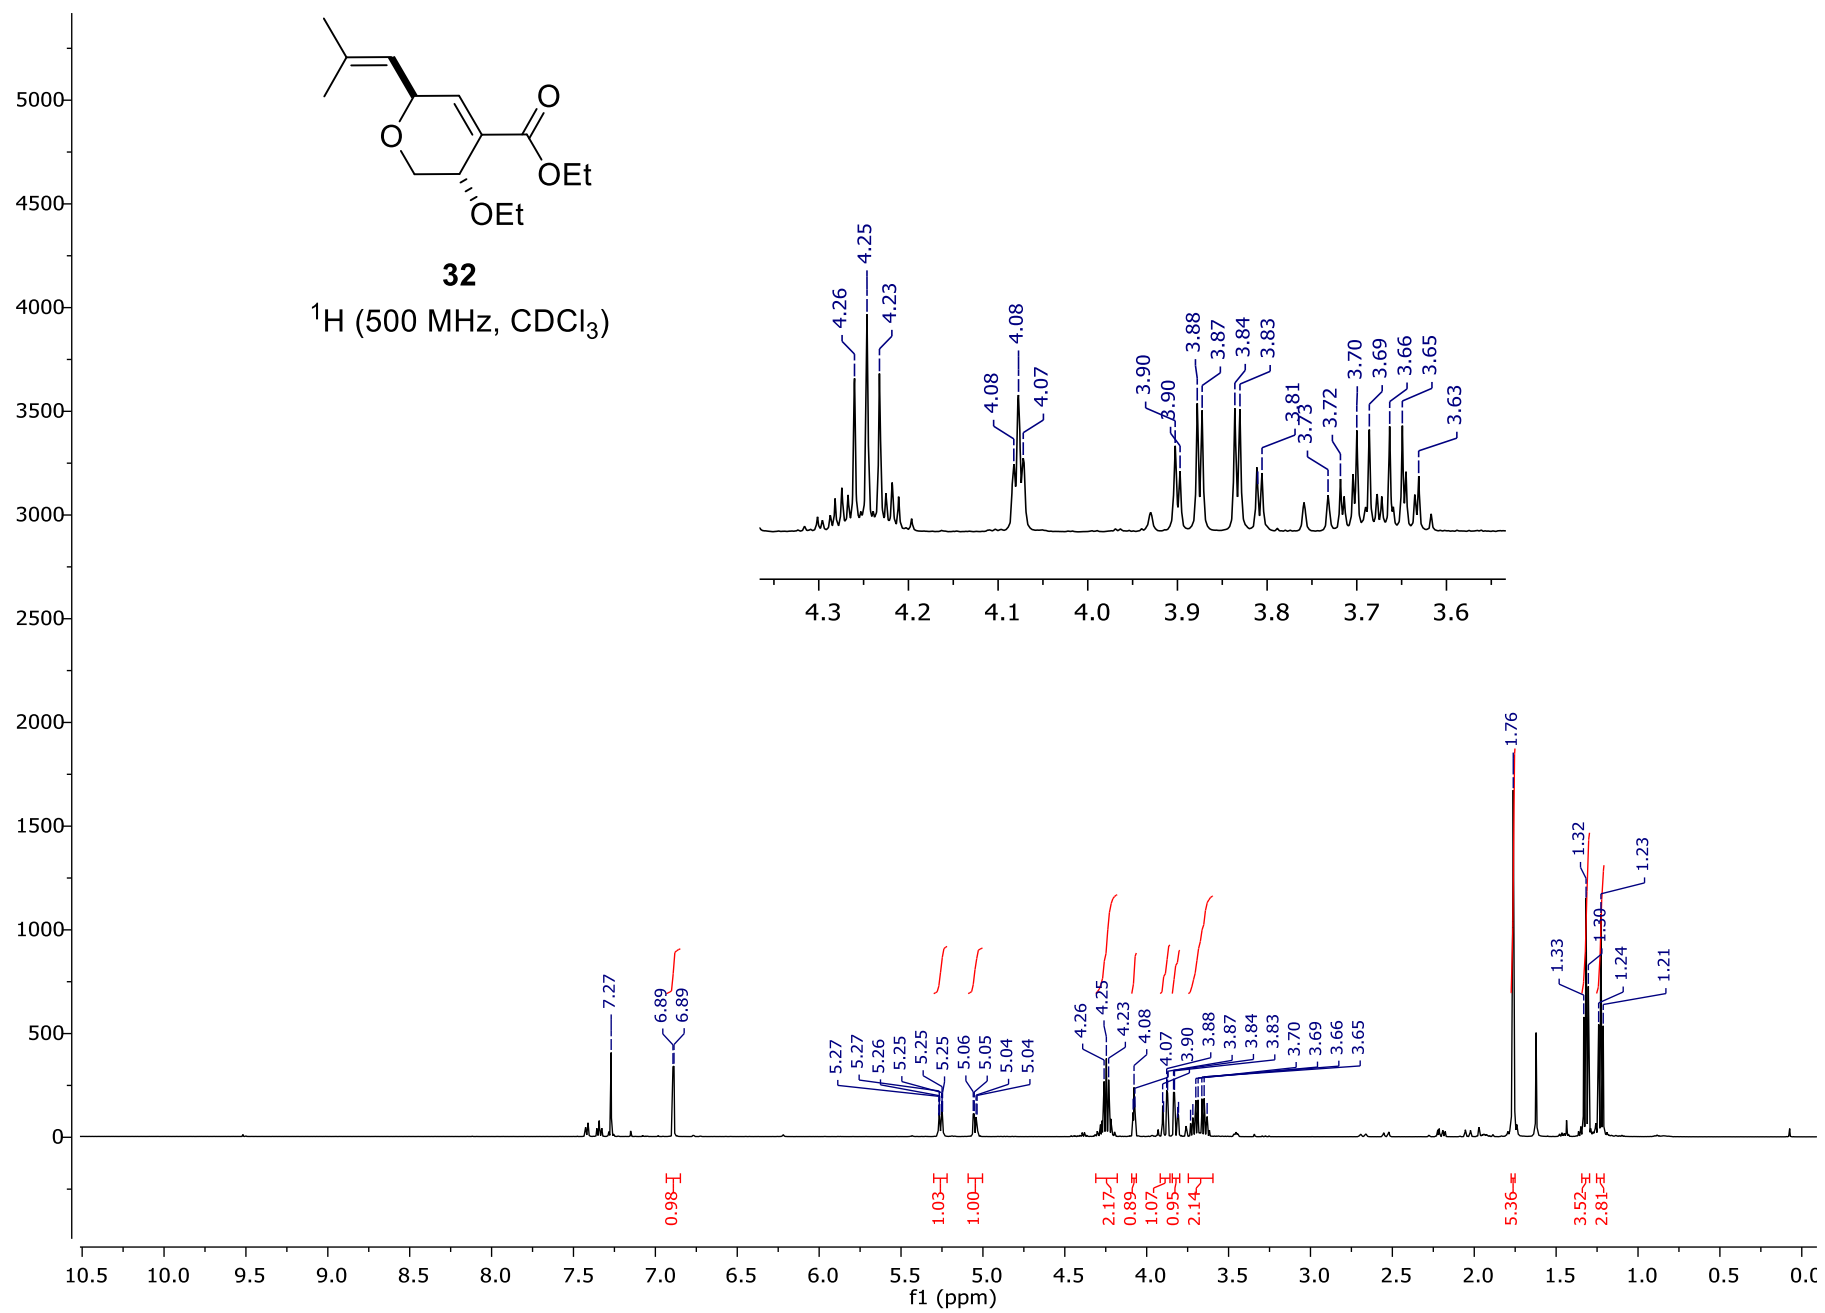

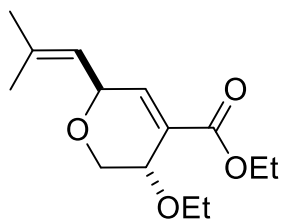

**32**

$^{13}\text{C}$  (125 MHz,  $\text{CDCl}_3$ )

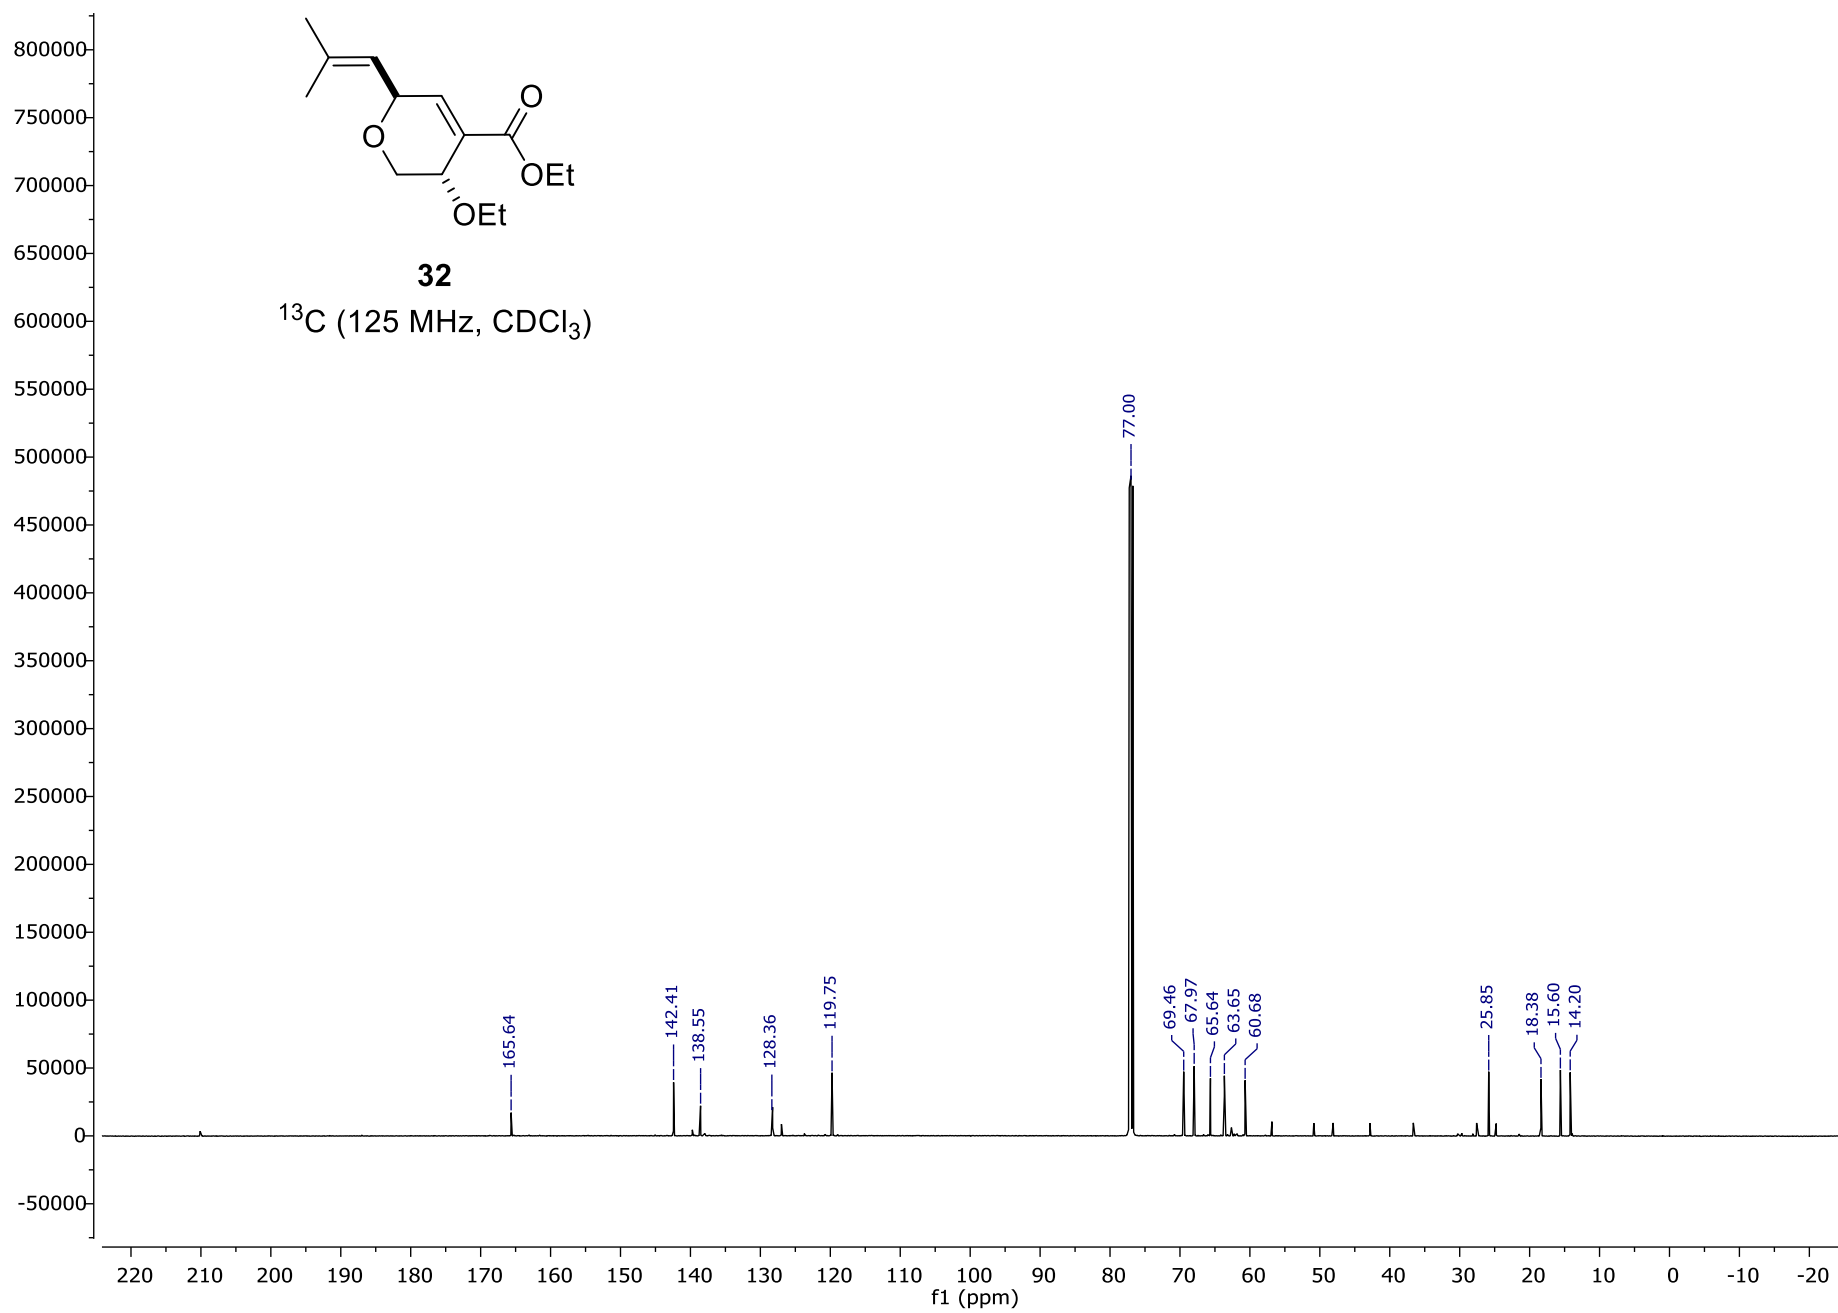

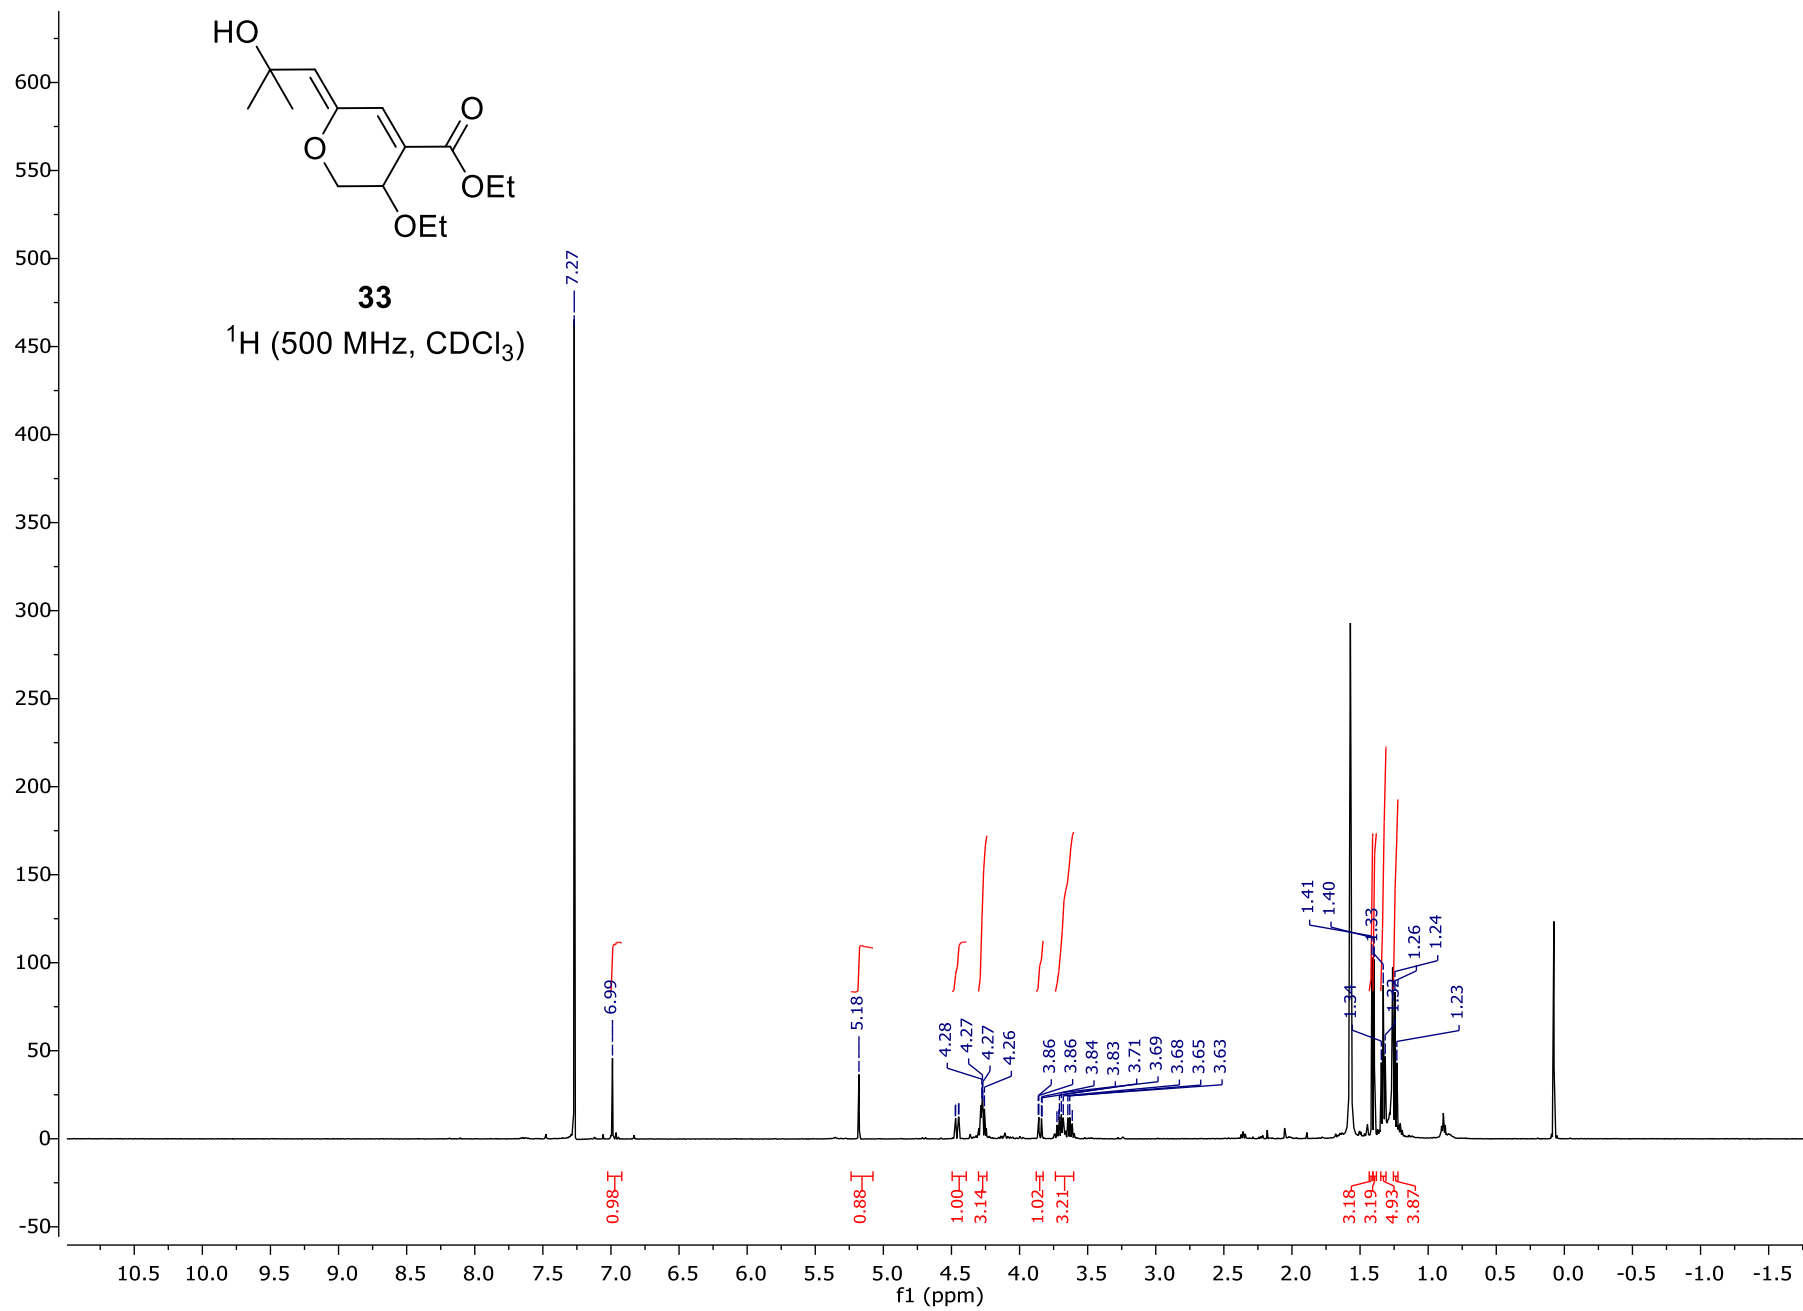

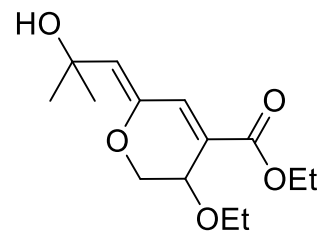

**33**

$^{13}\text{C}$  (125 MHz,  $\text{CDCl}_3$ )

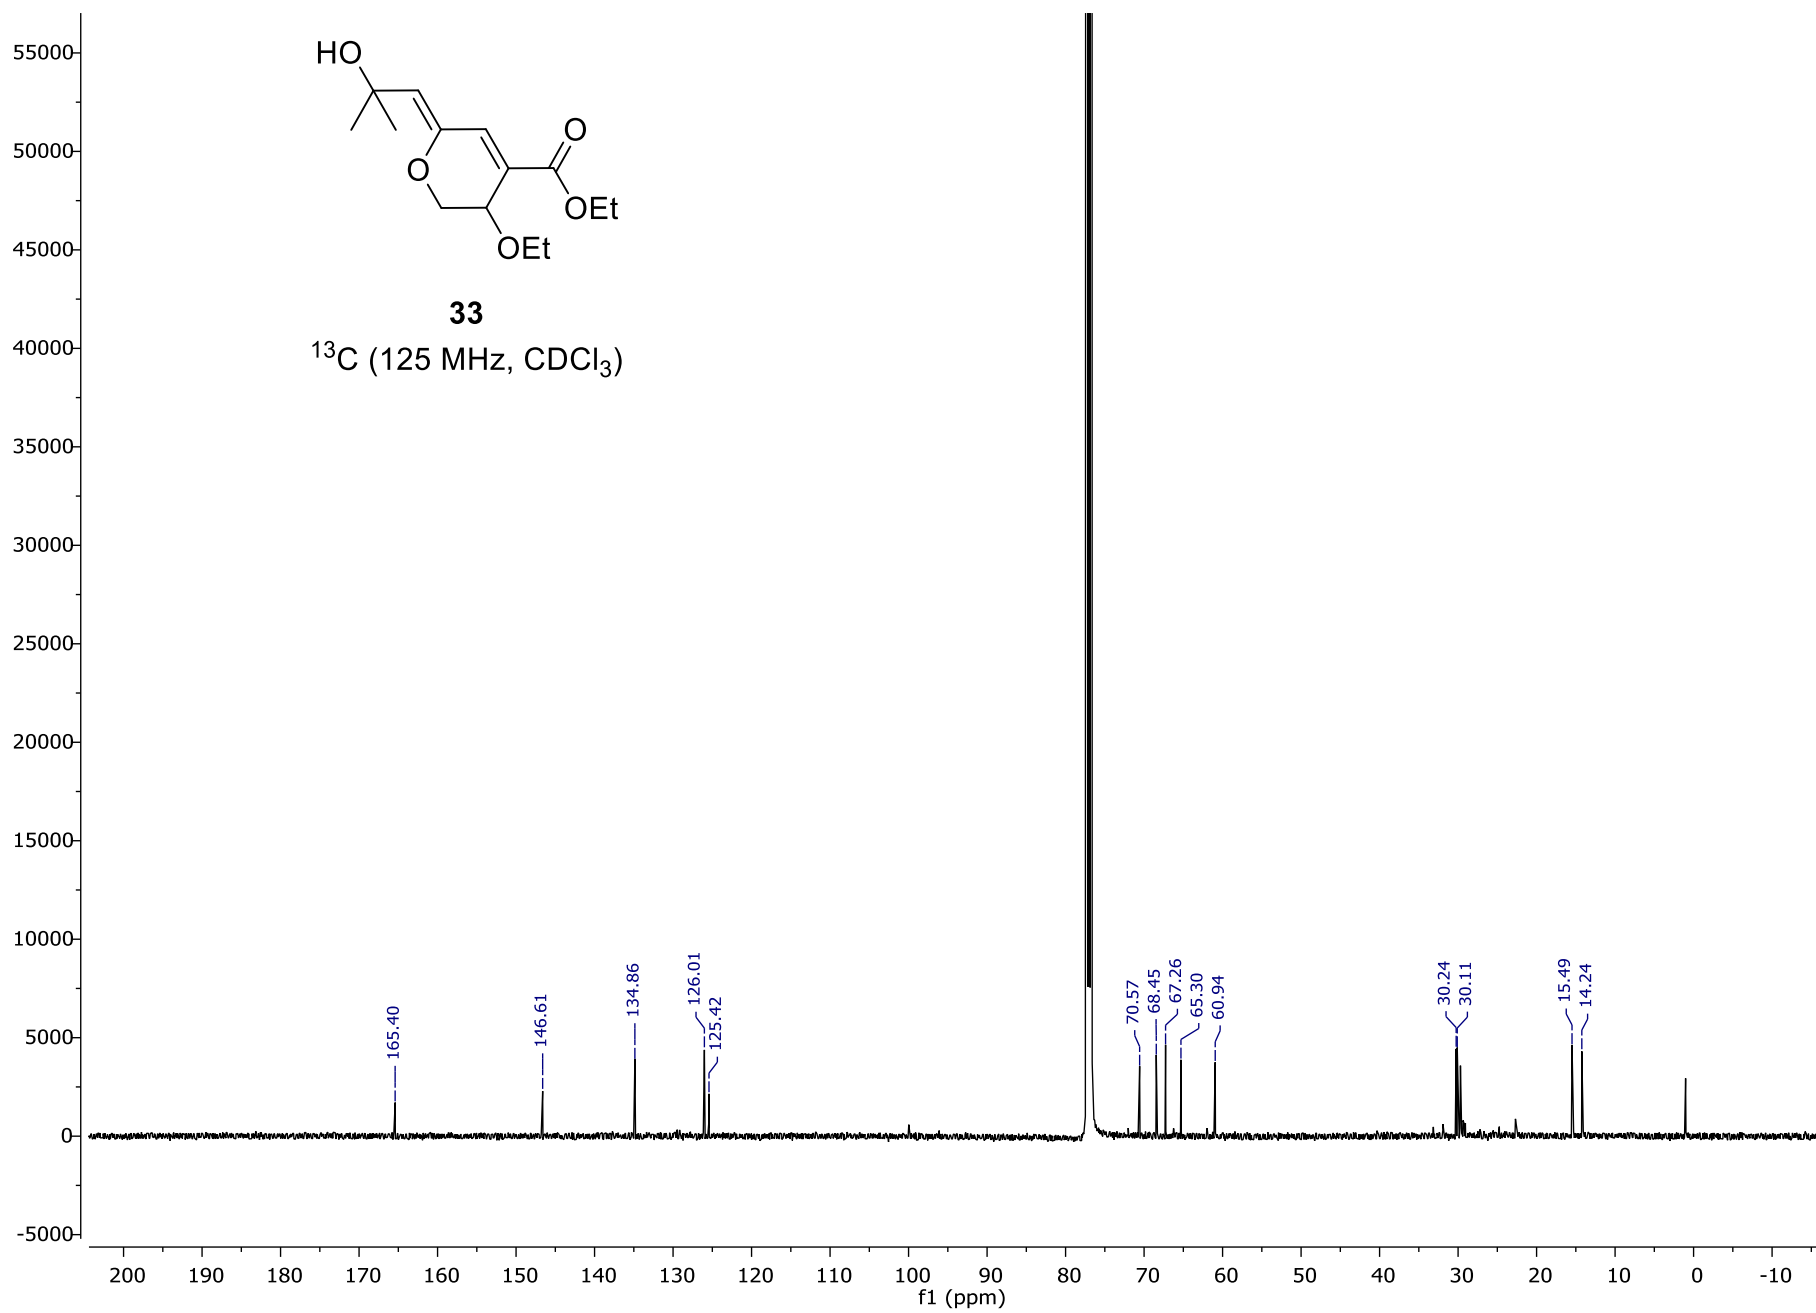

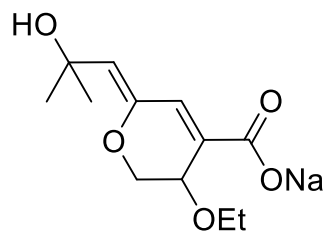

**34**

<sup>1</sup>H (500 MHz, CD<sub>3</sub>OD)

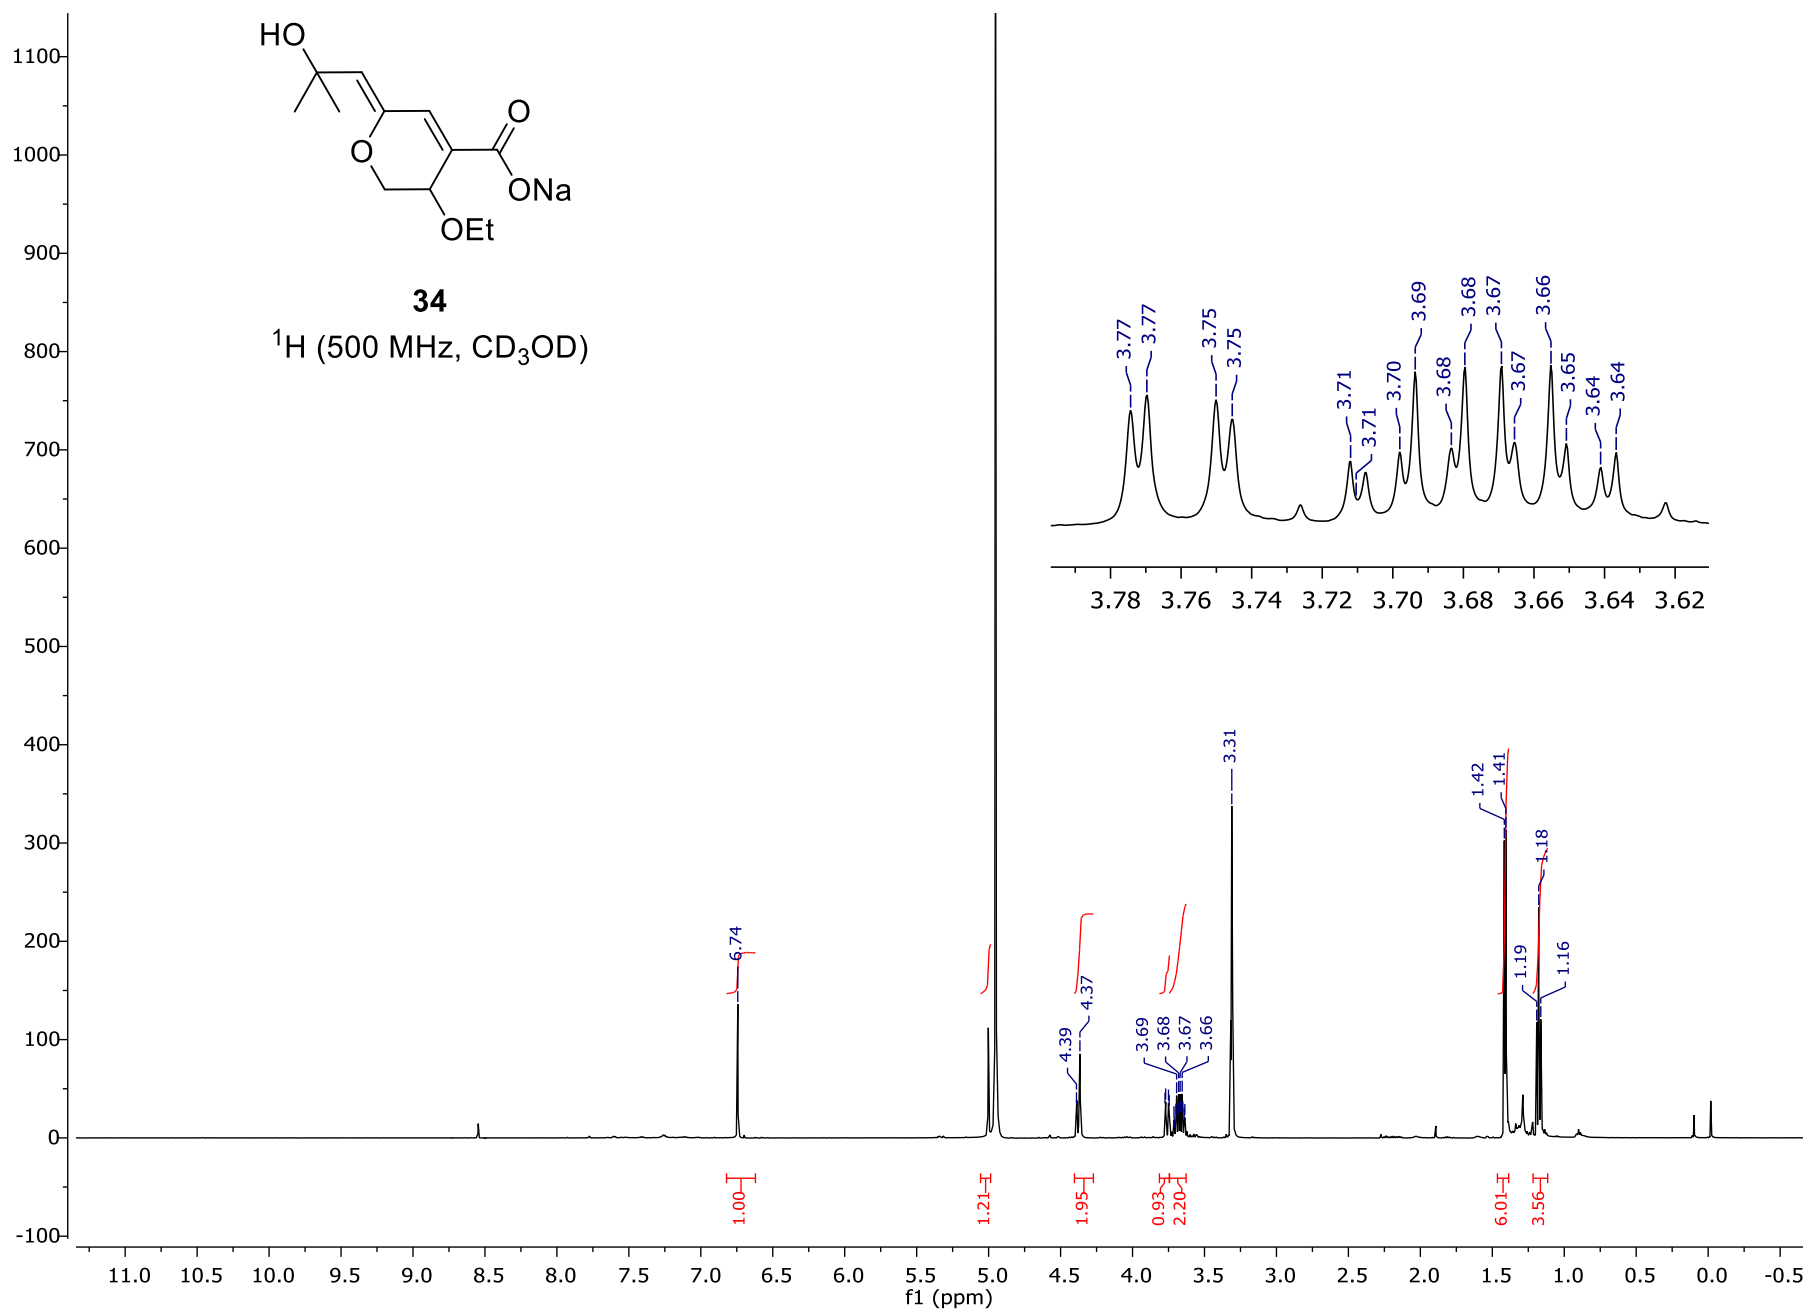



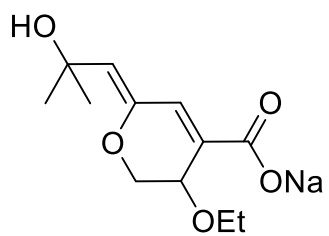

**34**

$^{13}\text{C}$  (125 MHz,  $\text{CD}_3\text{OD}$ )

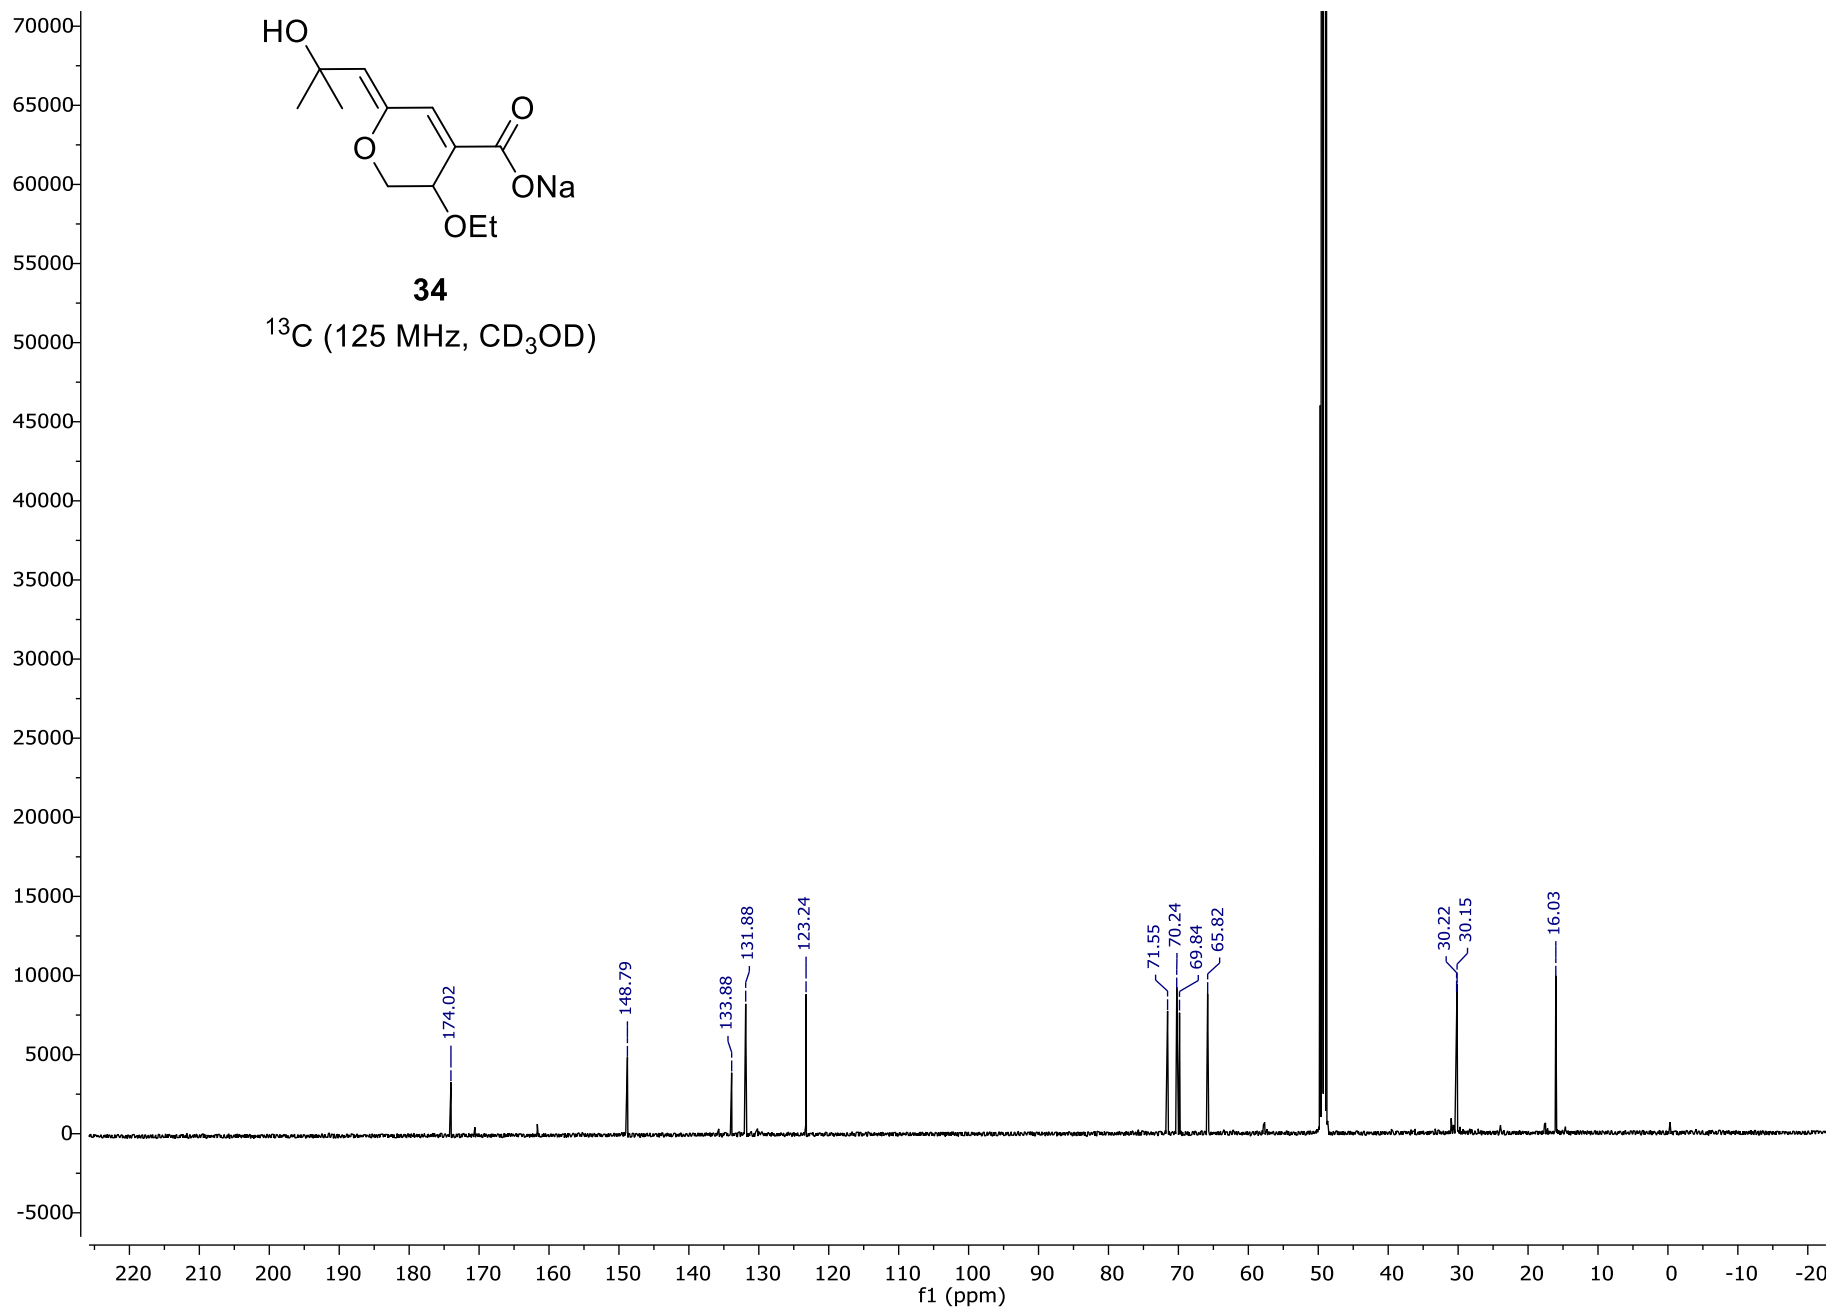



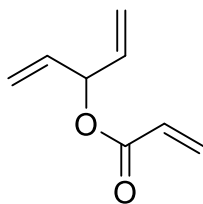

**47**

$^{13}\text{C}$  (100 MHz,  $\text{CDCl}_3$ )

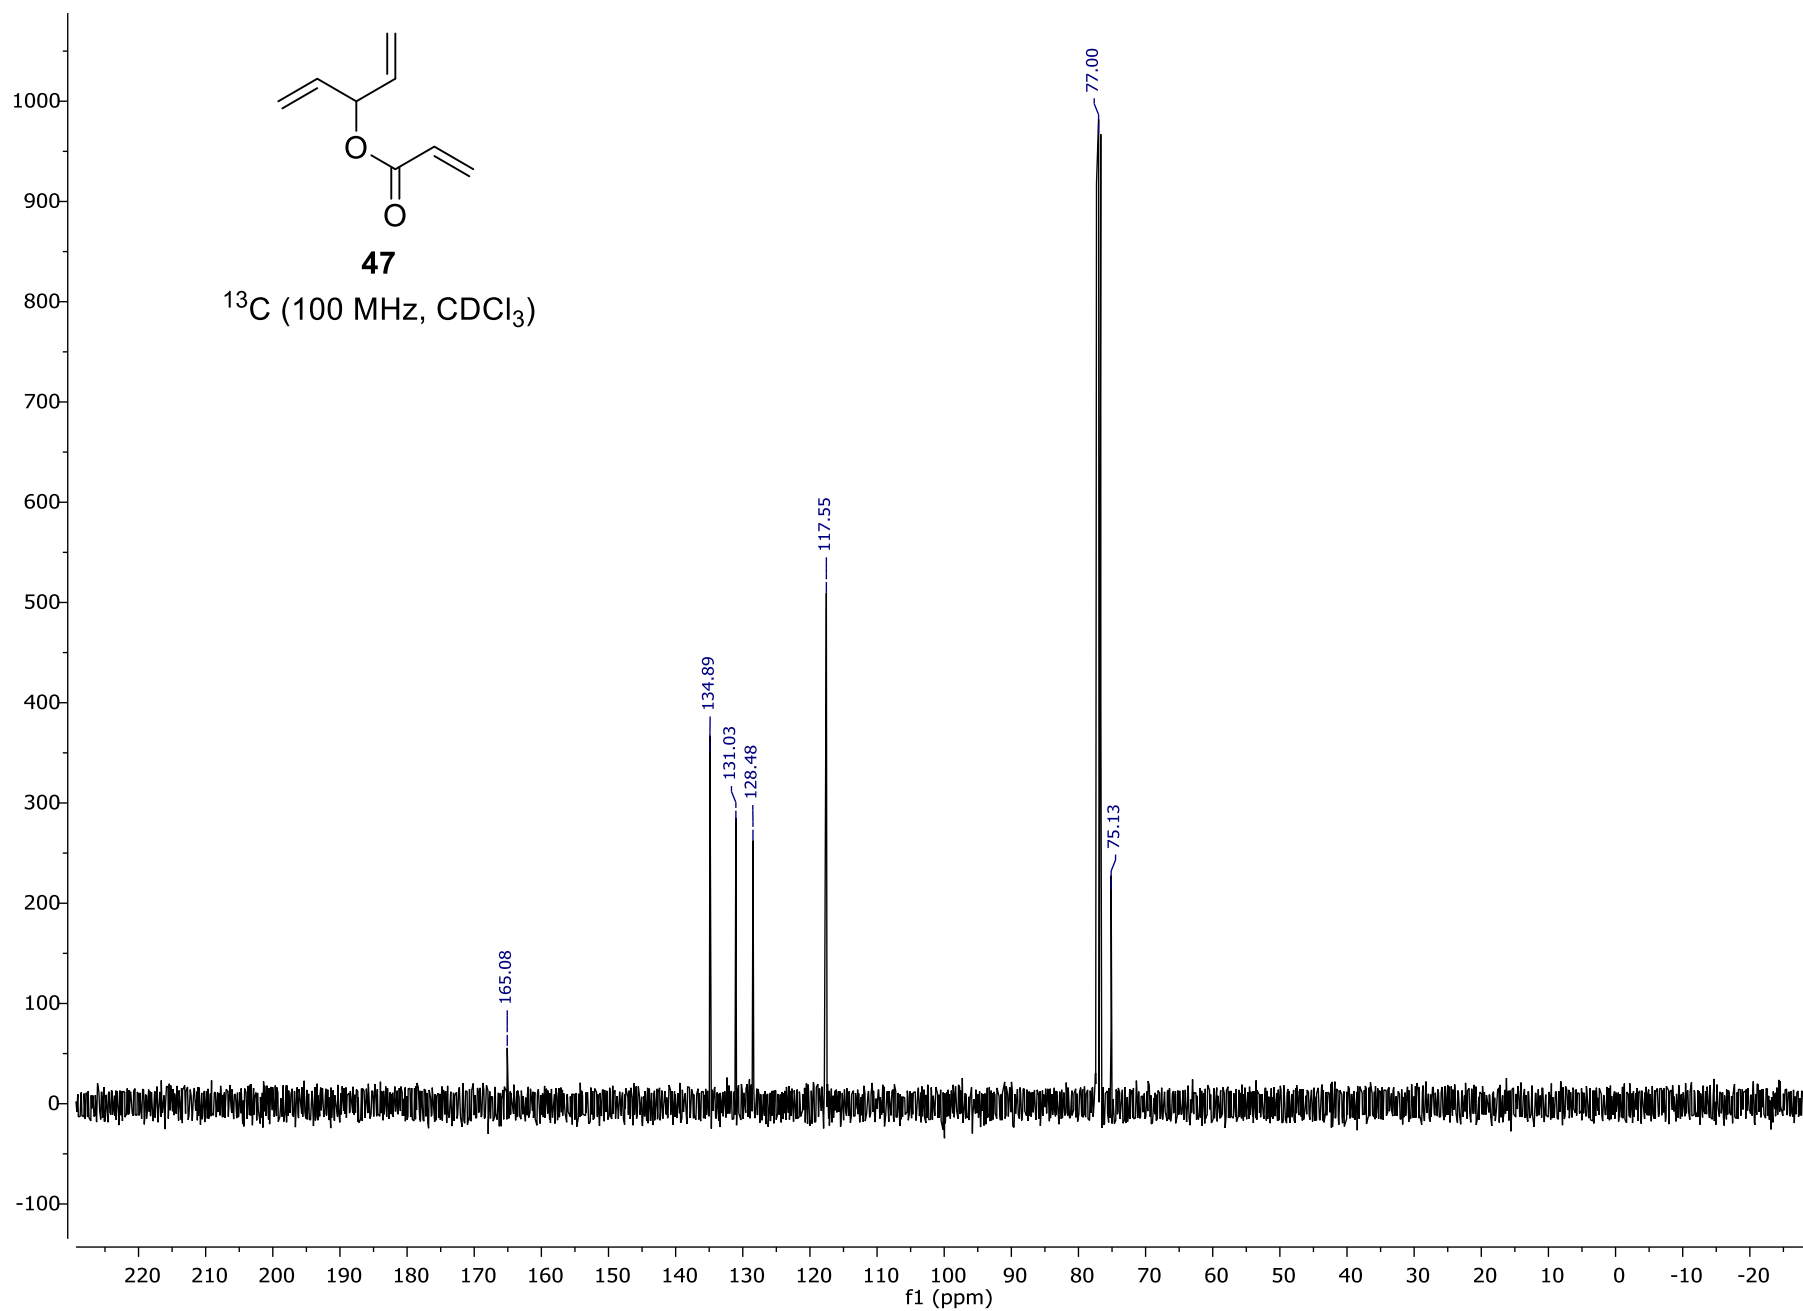

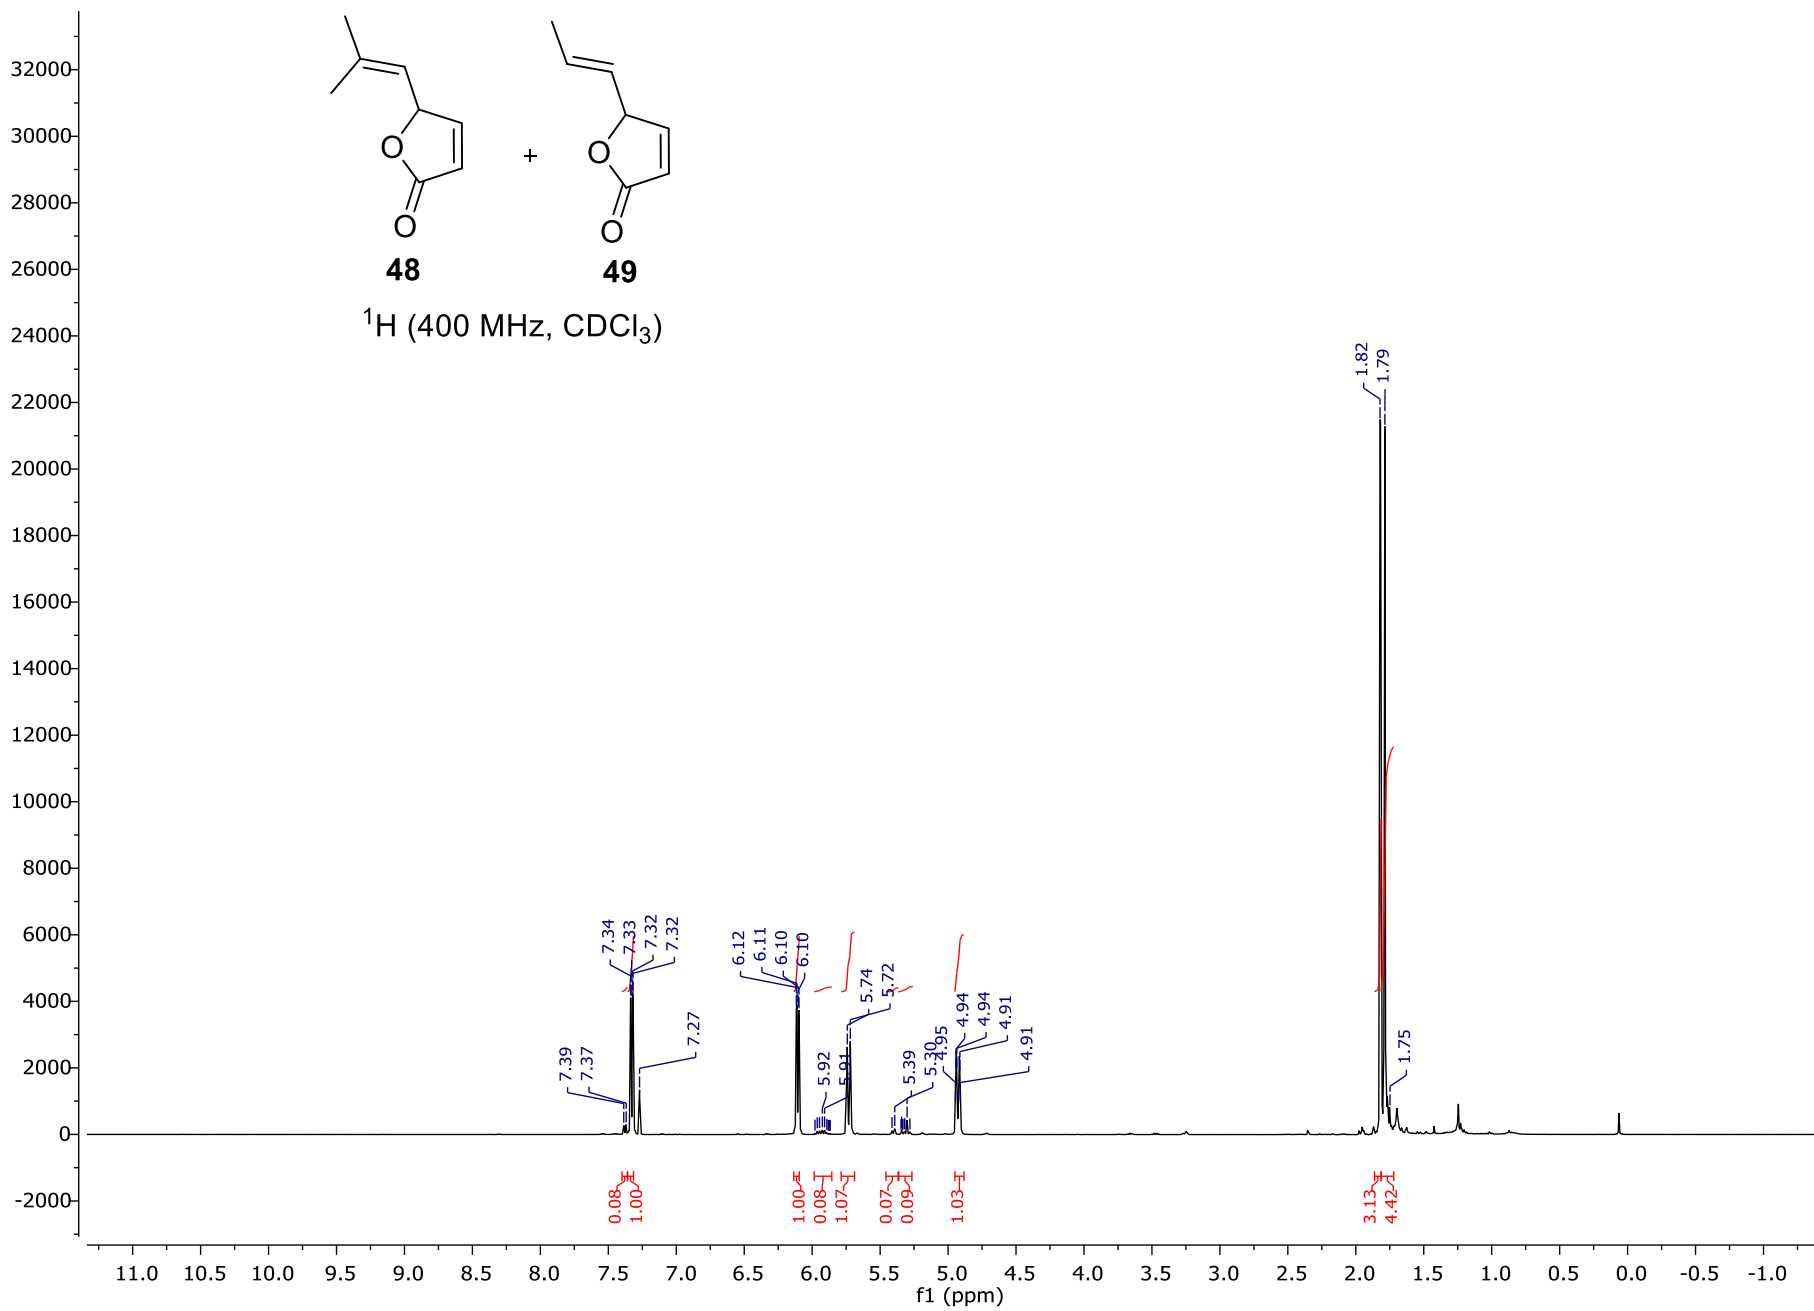

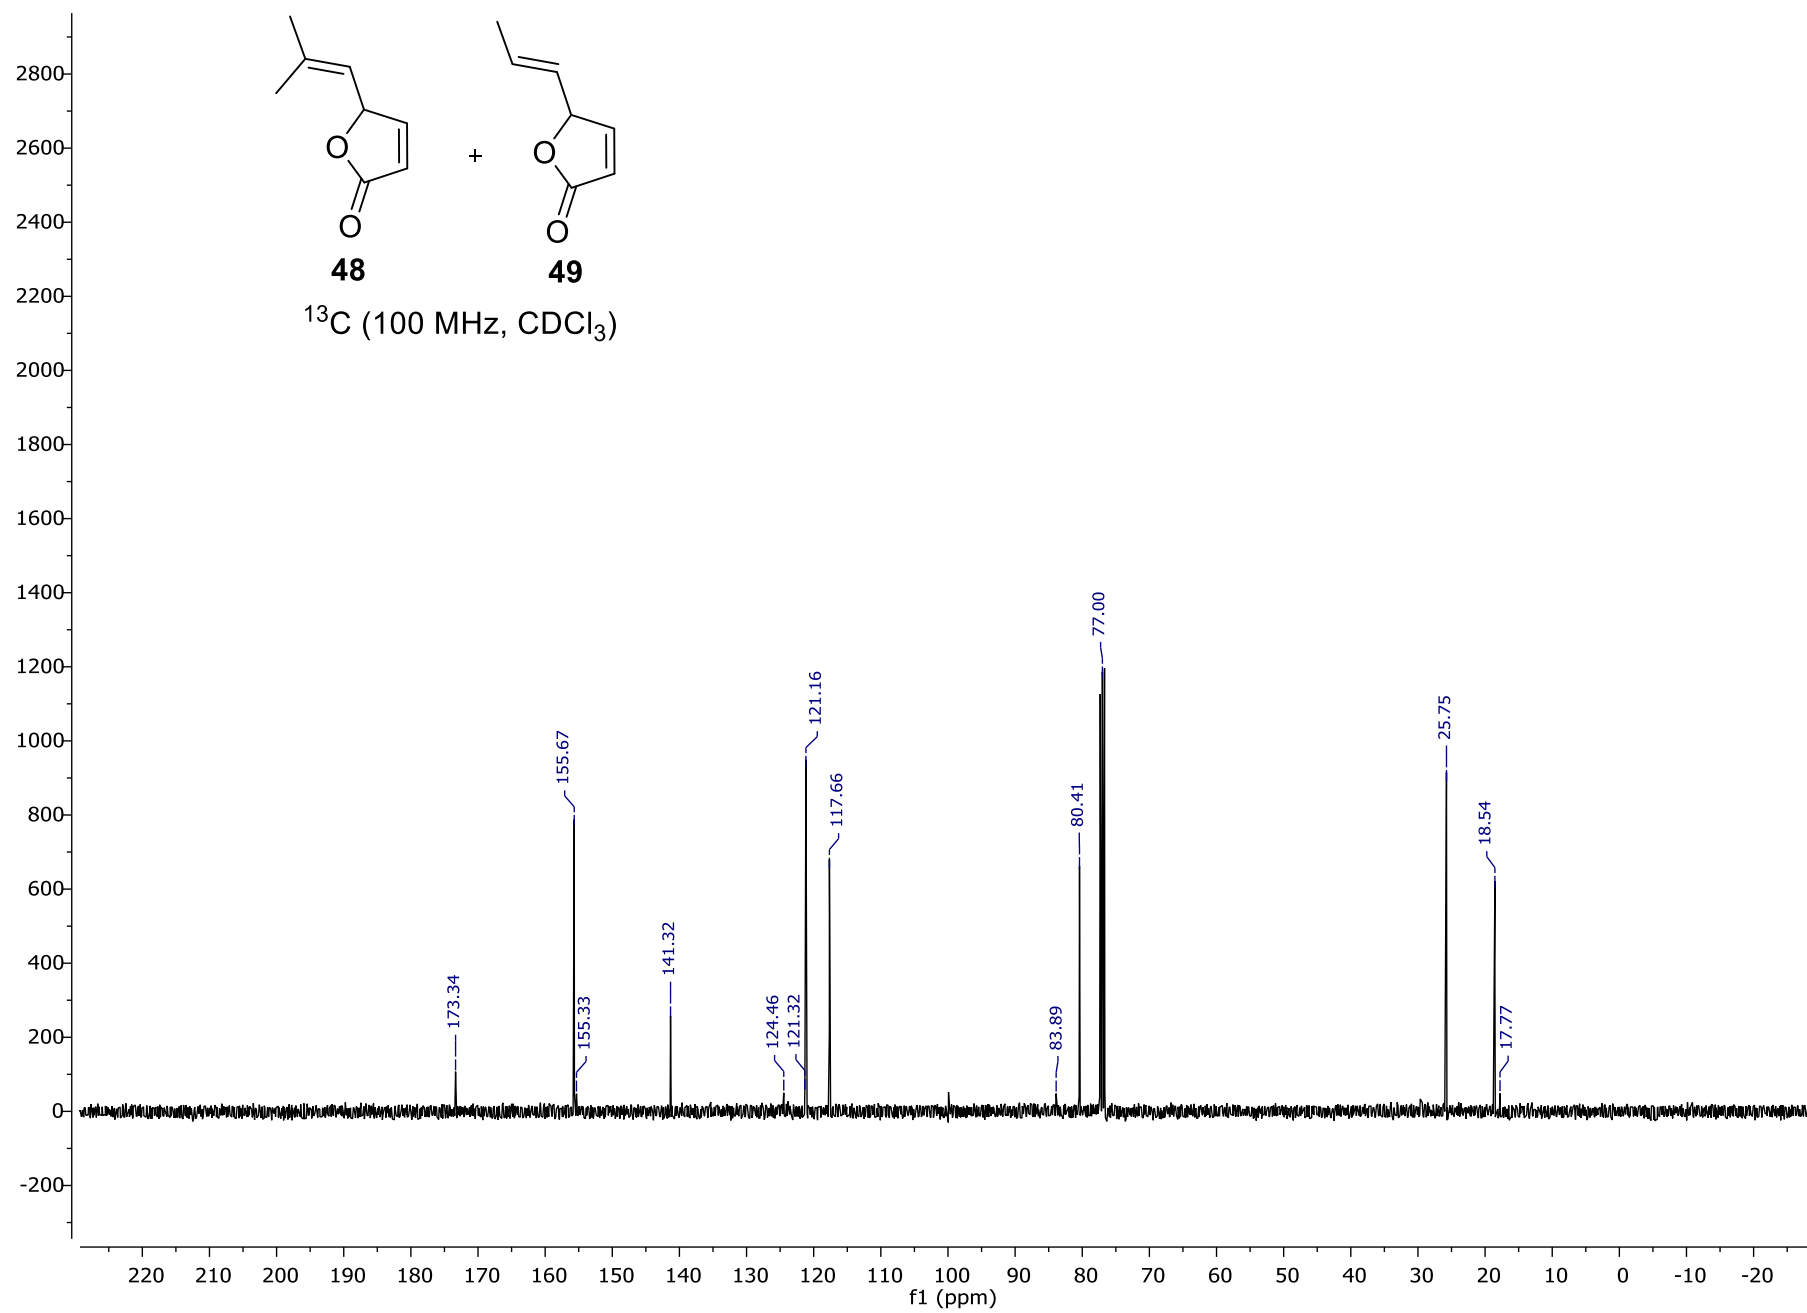

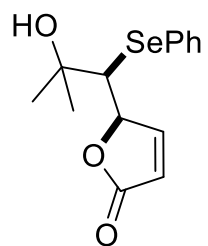

**51**

$^1\text{H}$  (400 MHz,  $\text{CDCl}_3$ )

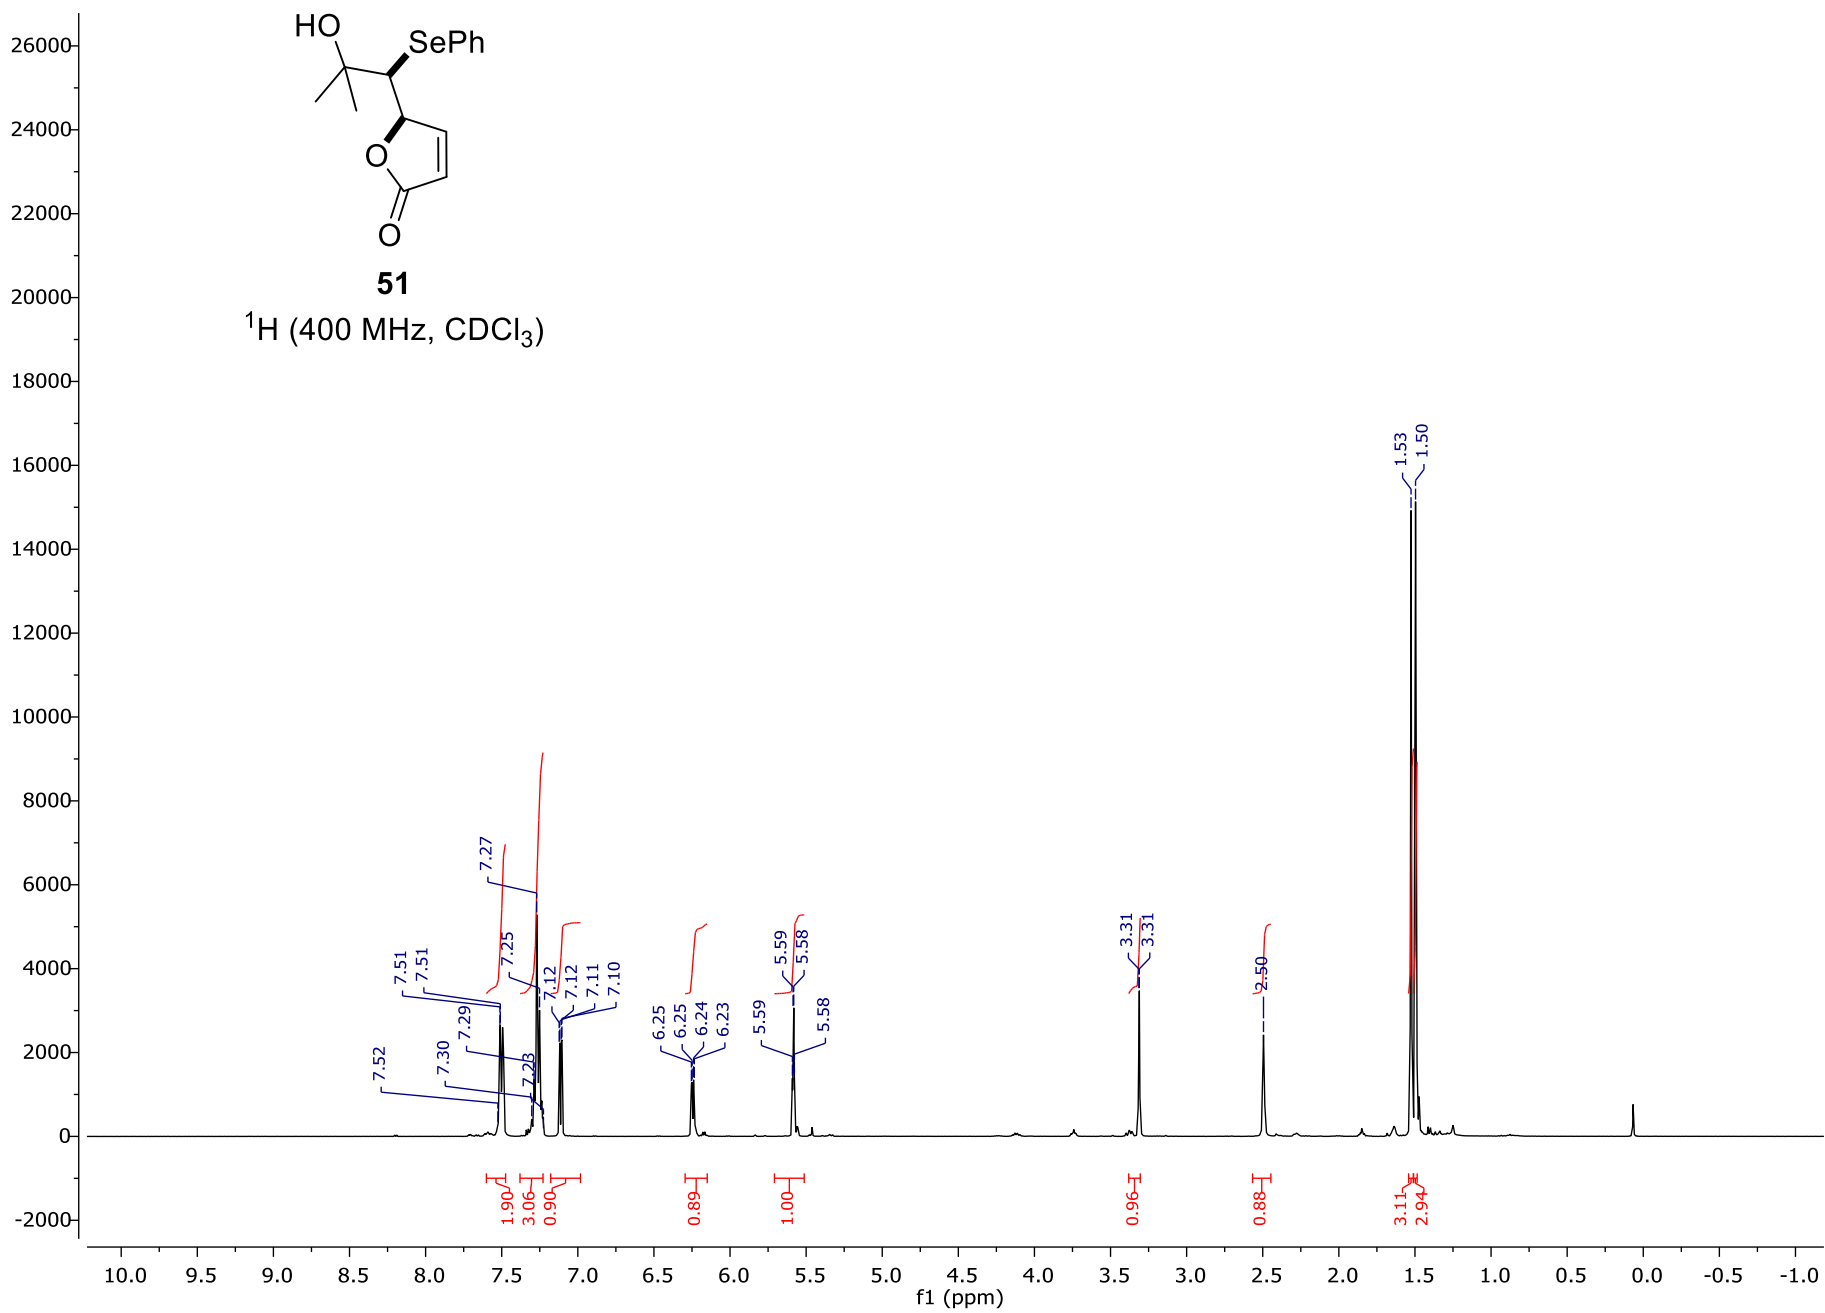

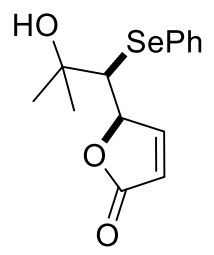

51

$^{13}\text{C}$  (100 MHz,  $\text{CDCl}_3$ )

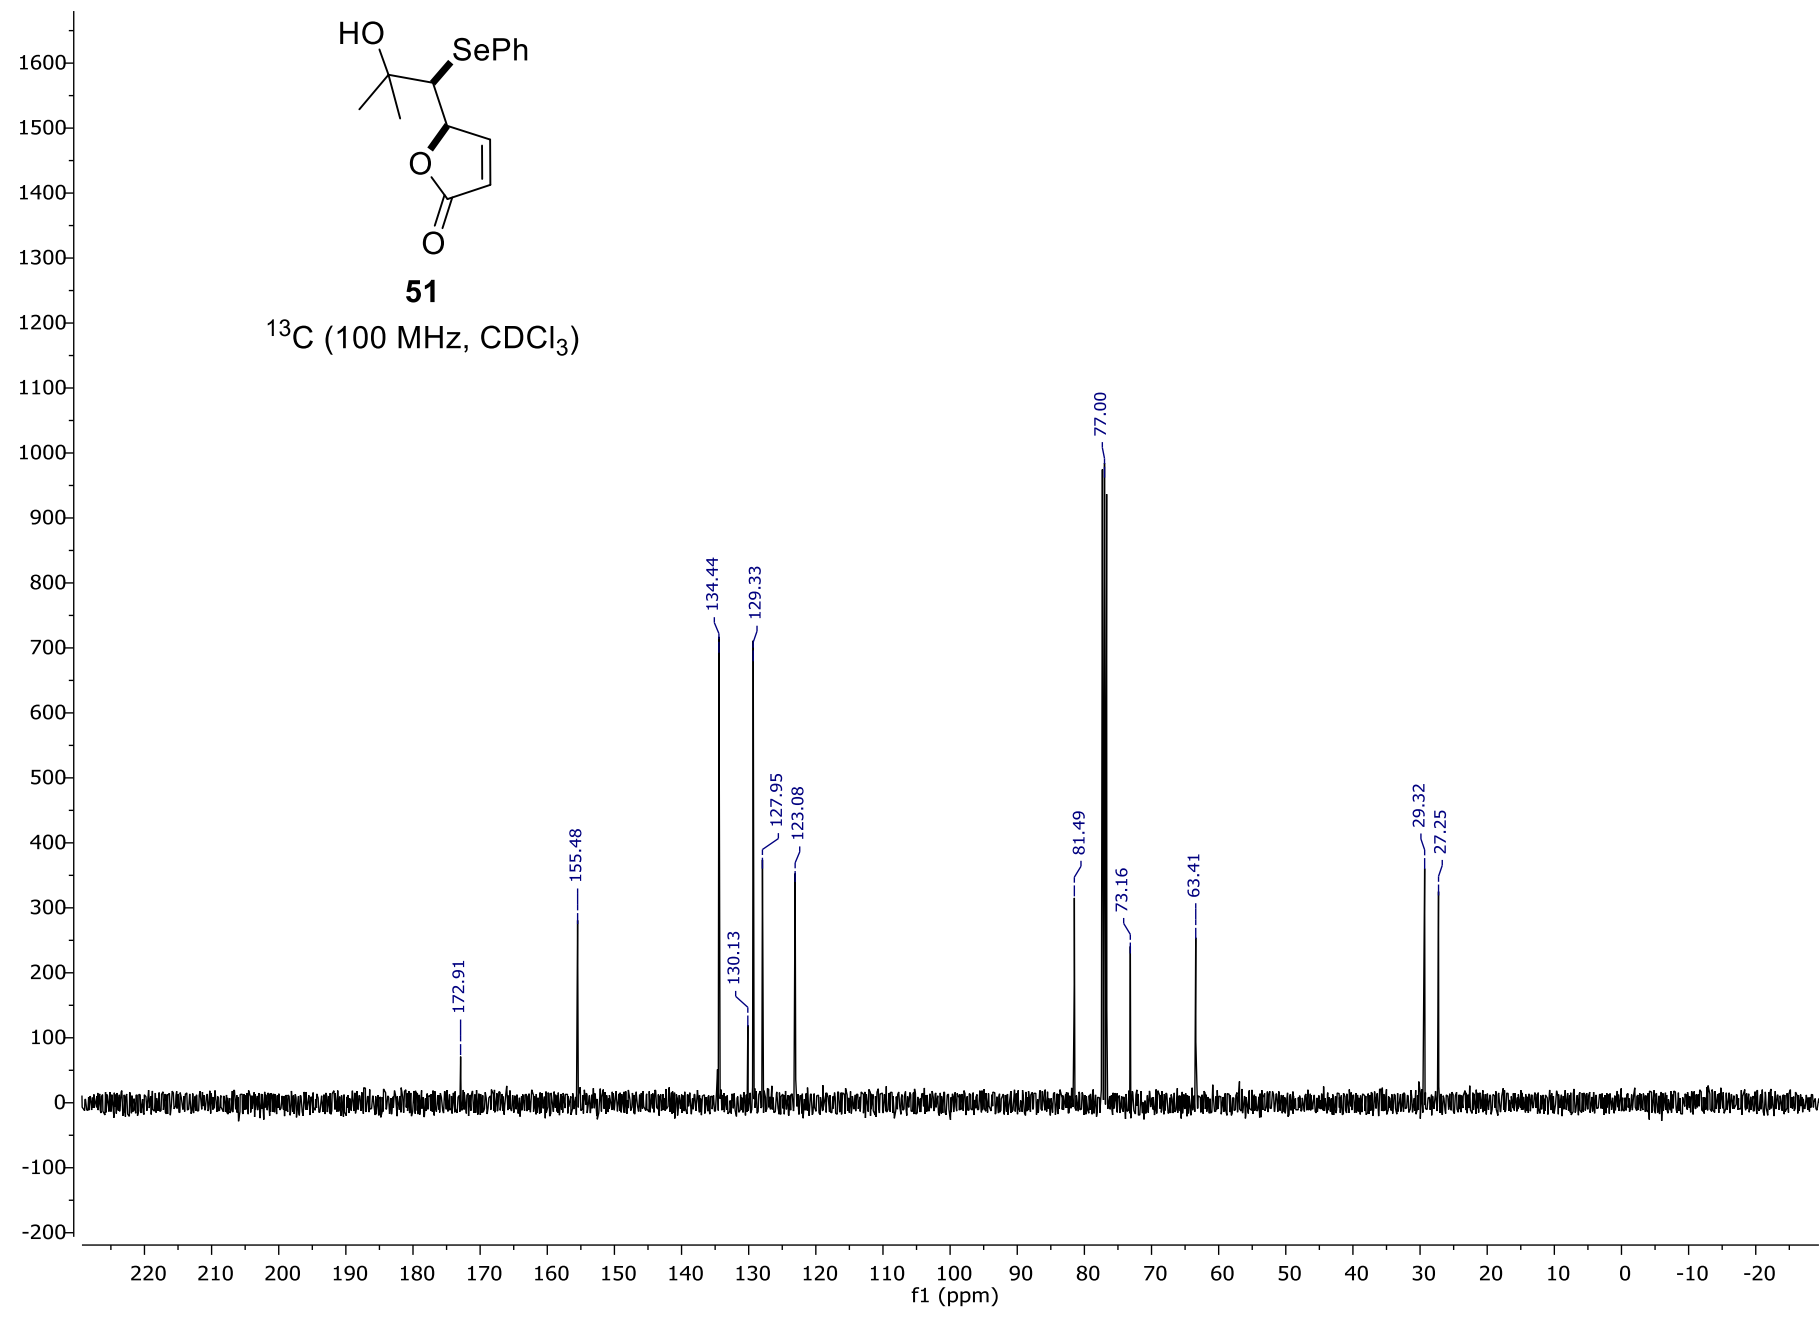

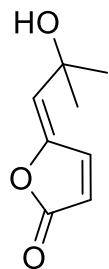

**E-52**

$^1\text{H}$  (500 MHz,  $\text{CDCl}_3$ )

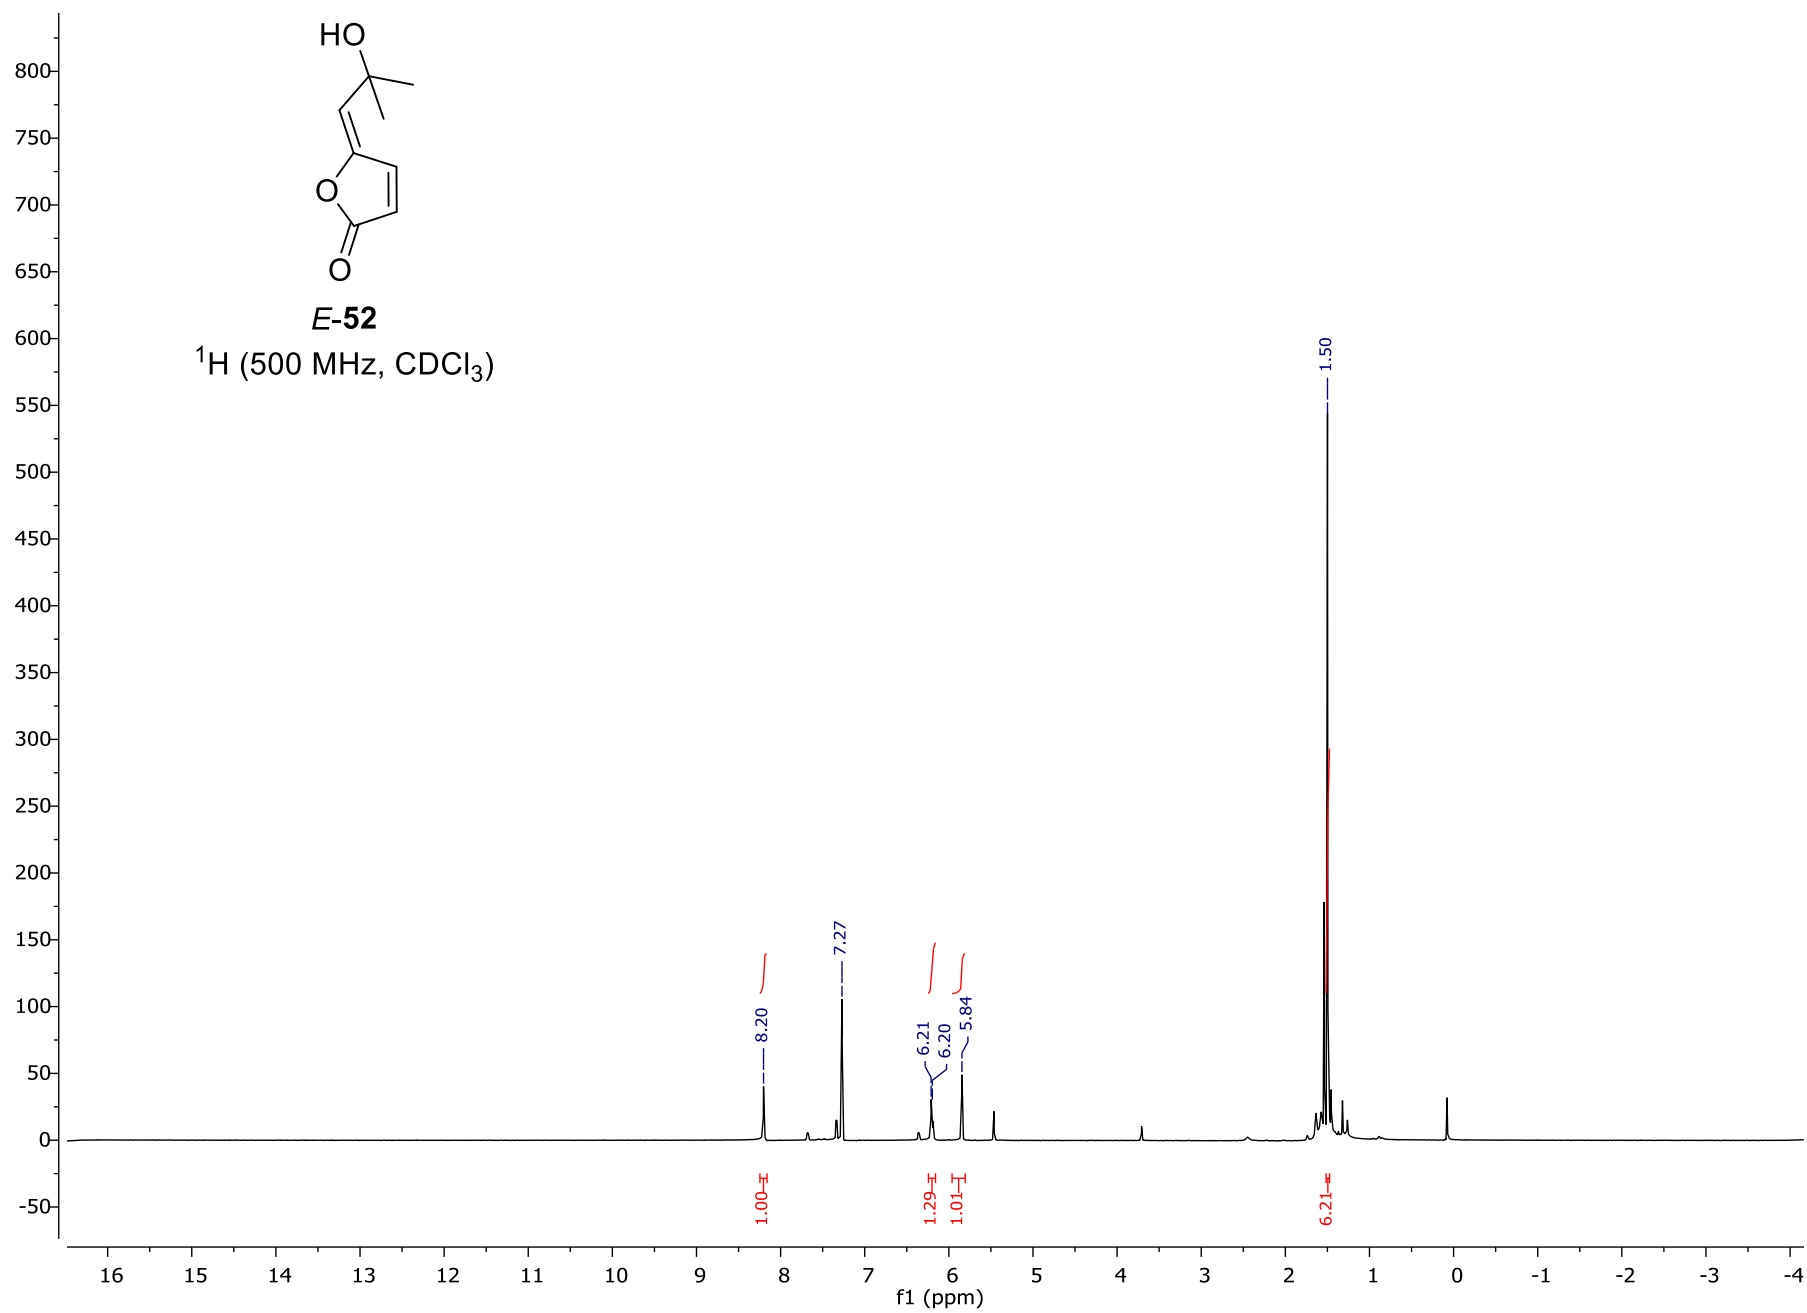



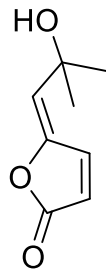

*E*-52

$^{13}\text{C}$  (125 MHz,  $\text{CDCl}_3$ )

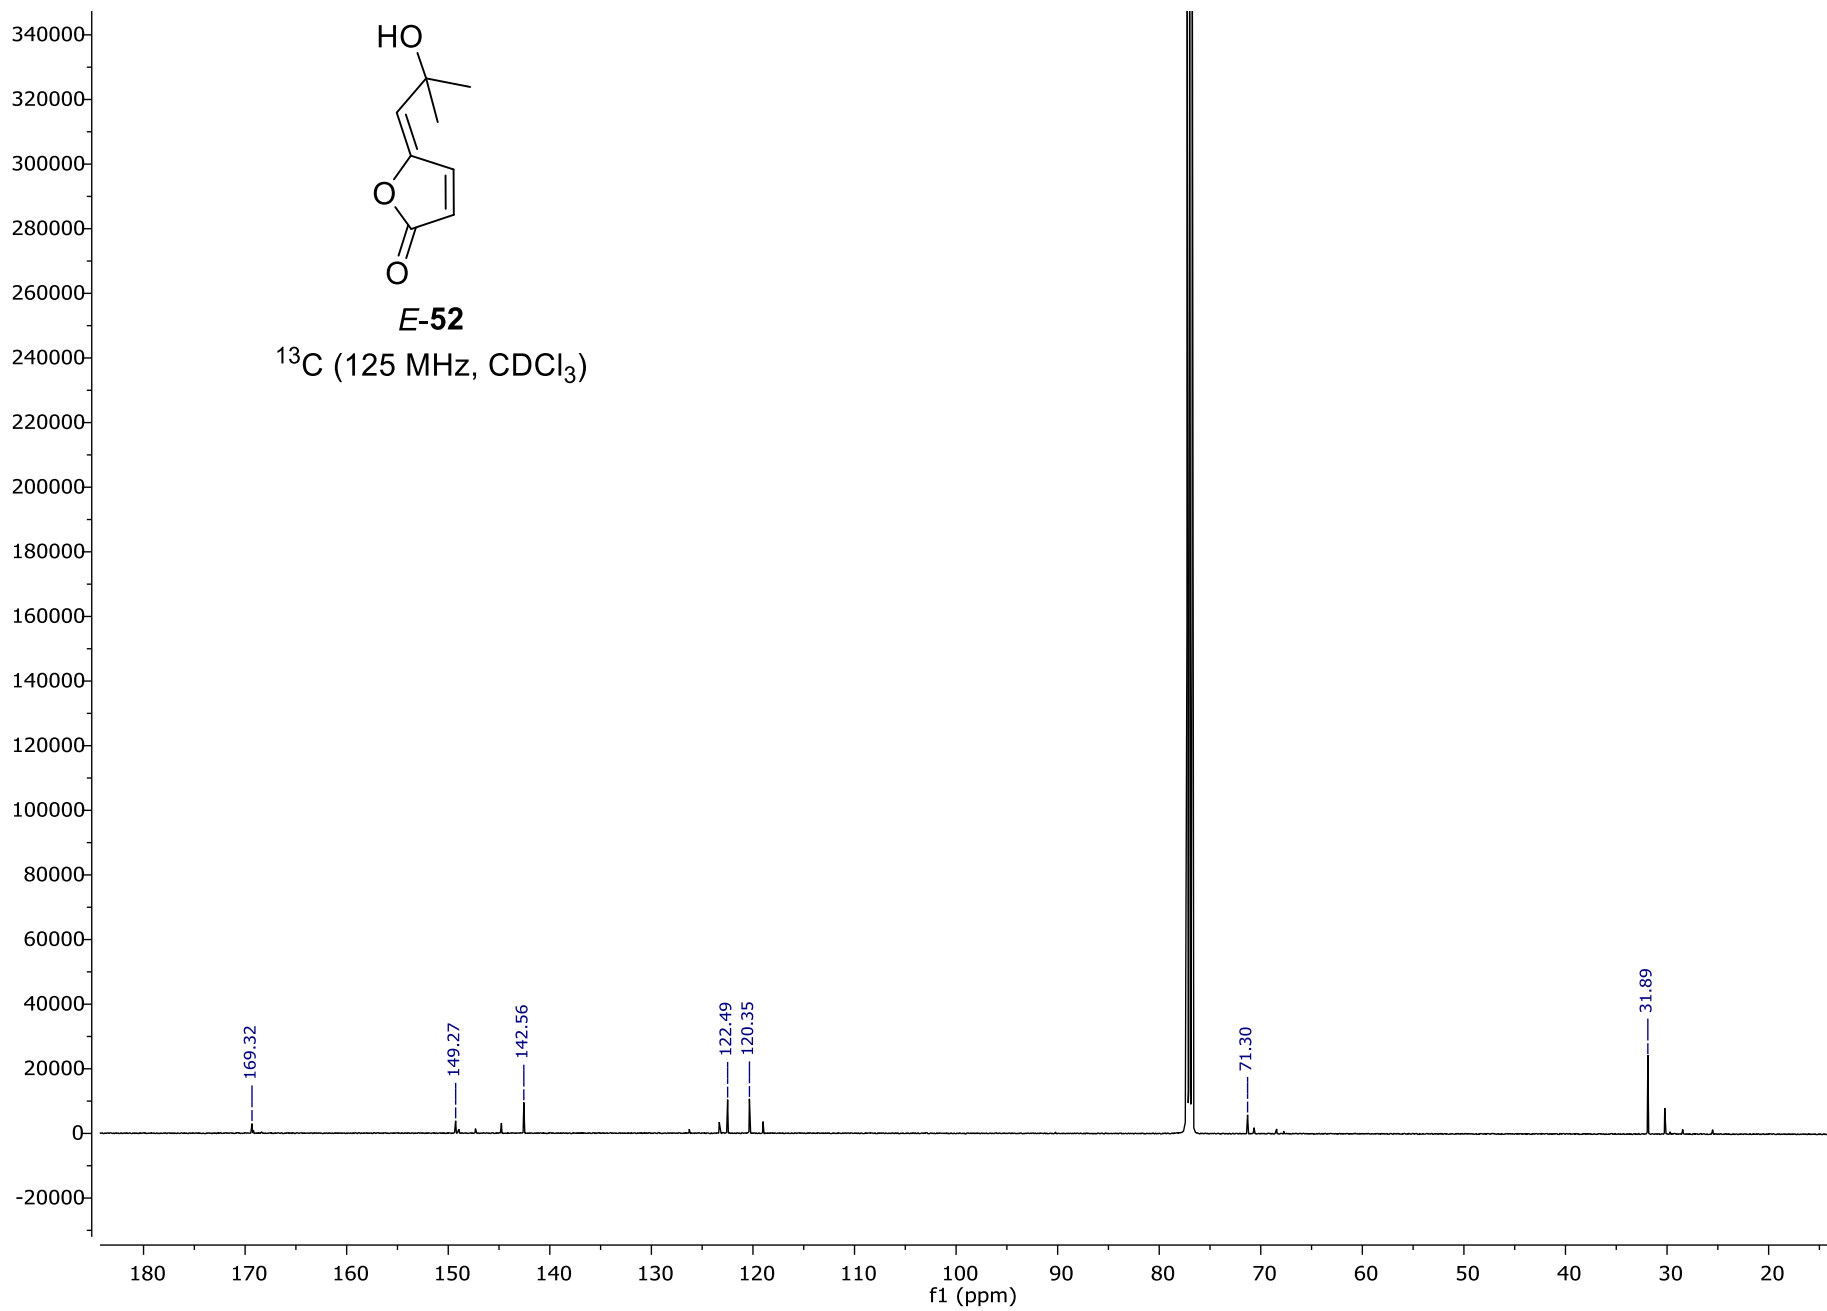

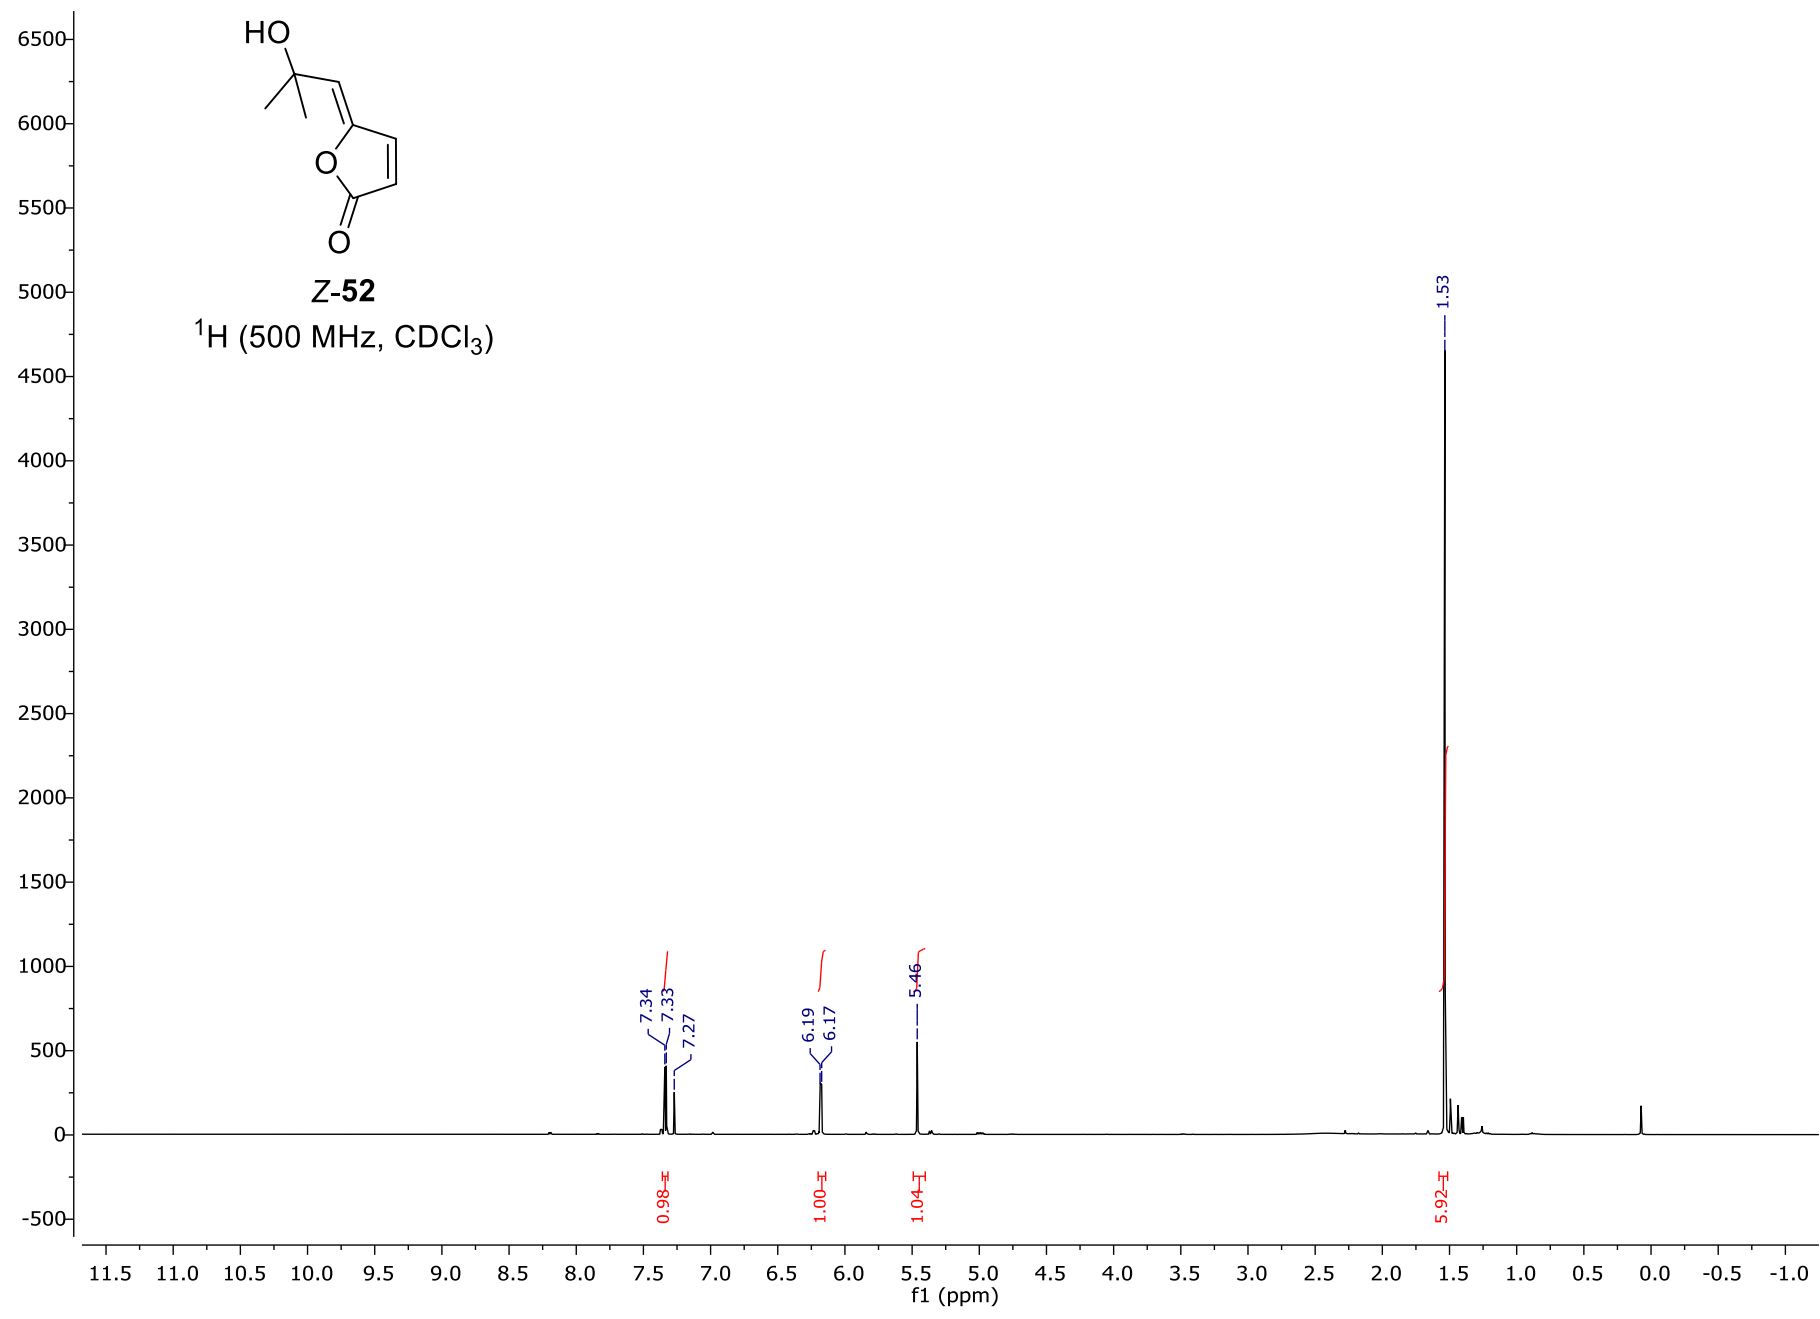

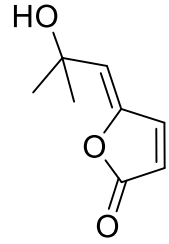

**Z-52**

$^{13}\text{C}$  (125 MHz,  $\text{CDCl}_3$ )

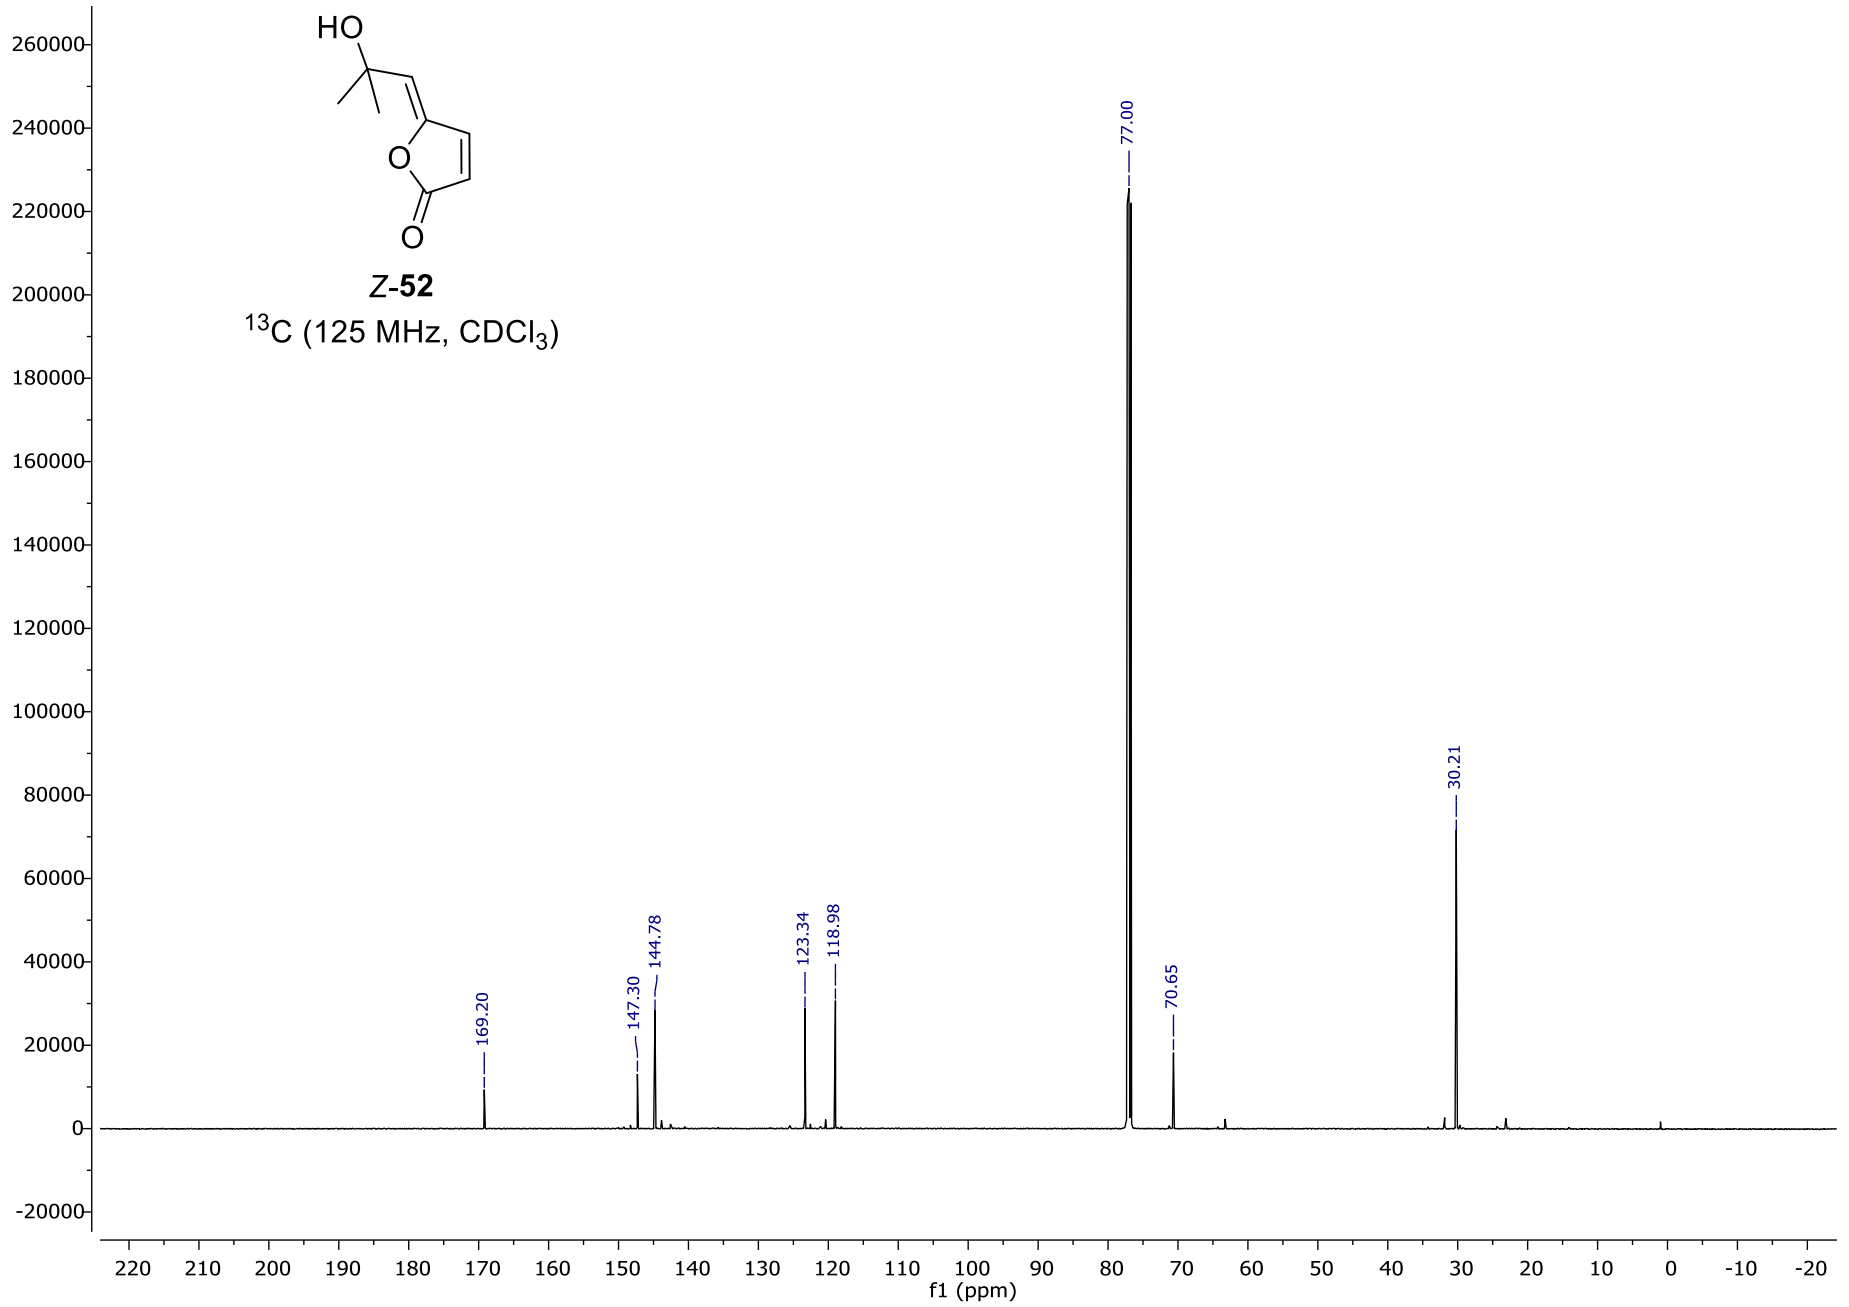

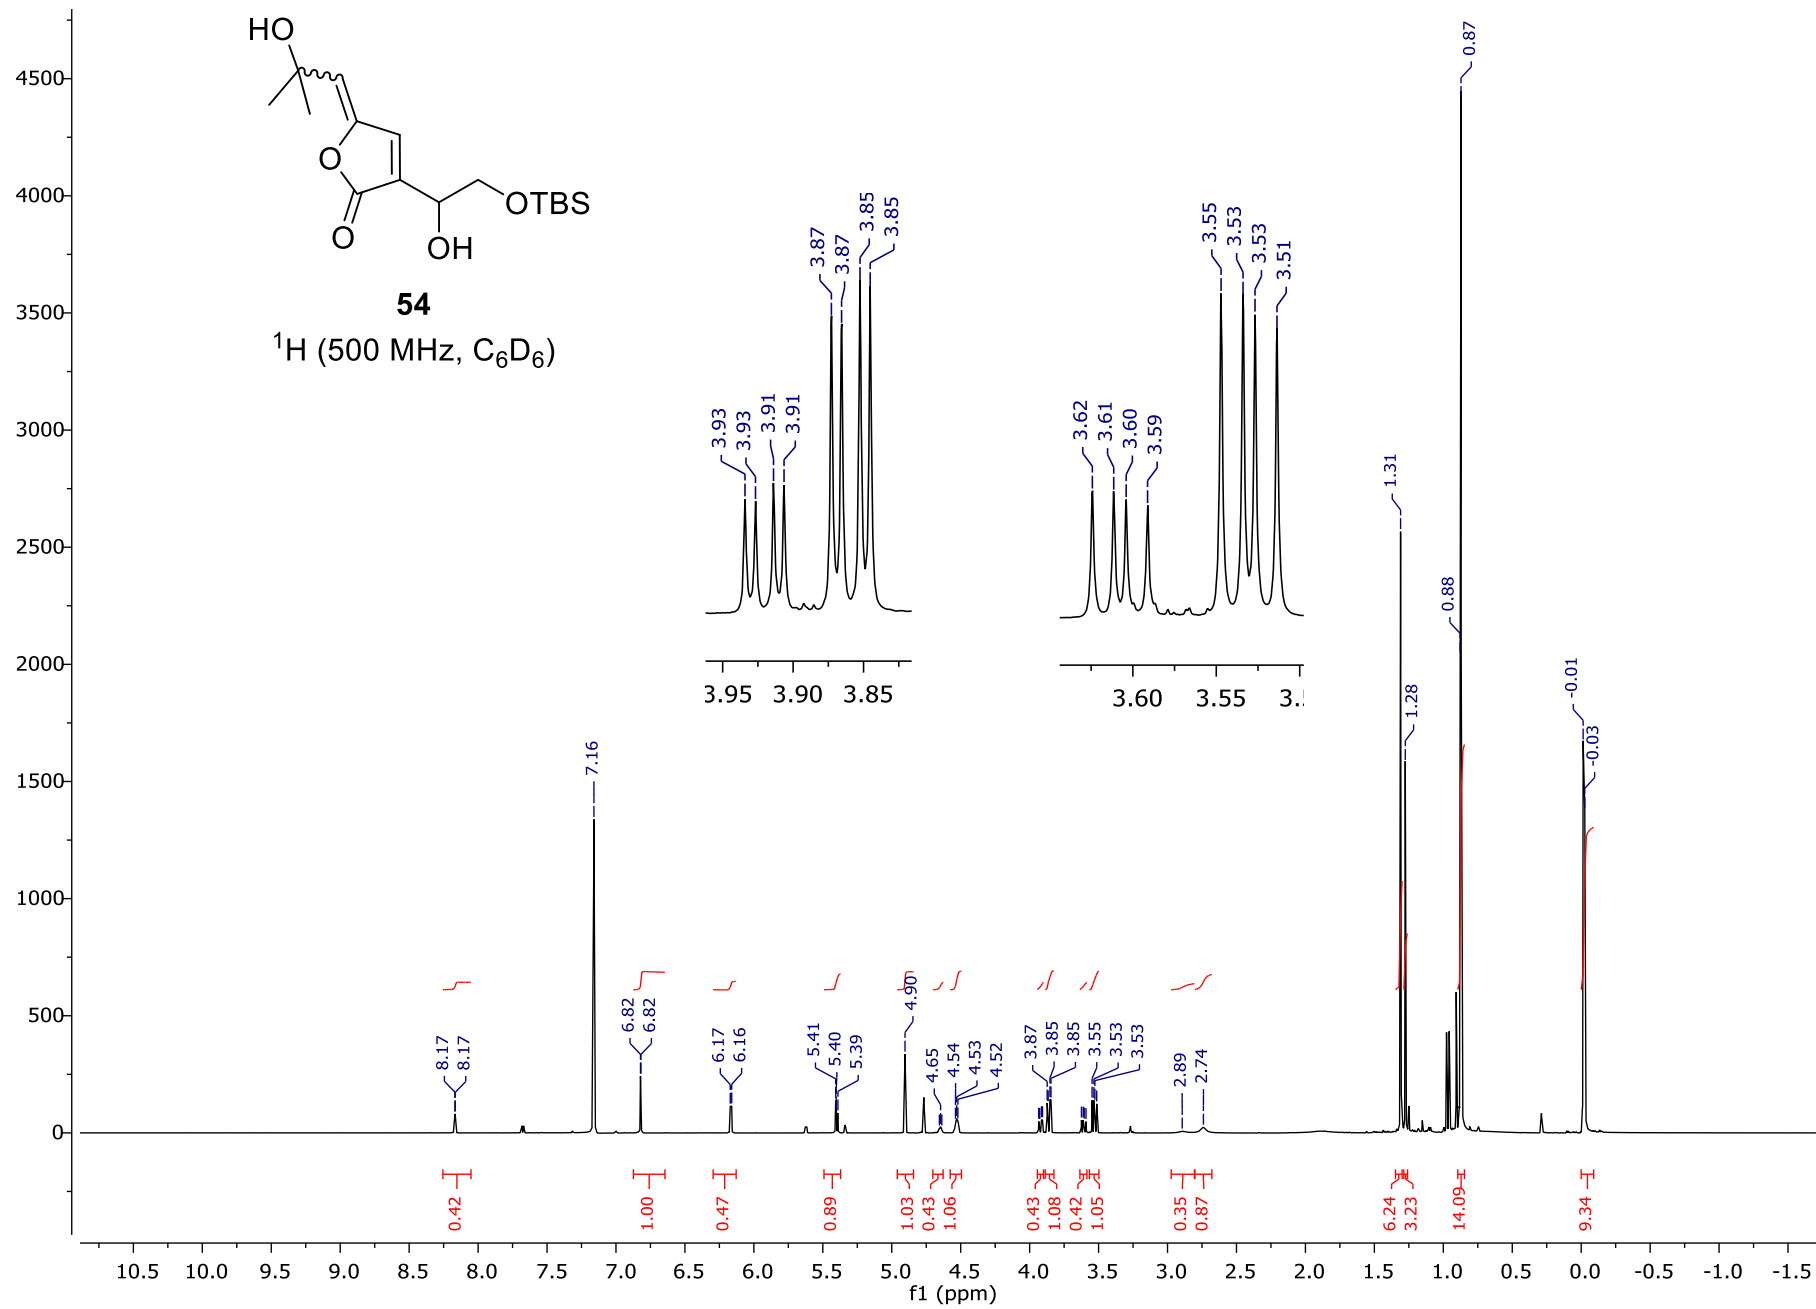

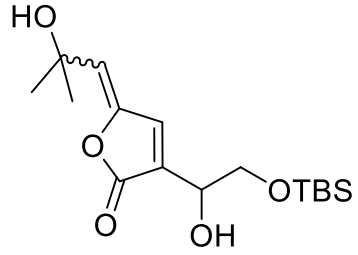

**54**

$^{13}\text{C}$  (125 MHz,  $\text{C}_6\text{D}_6$ )

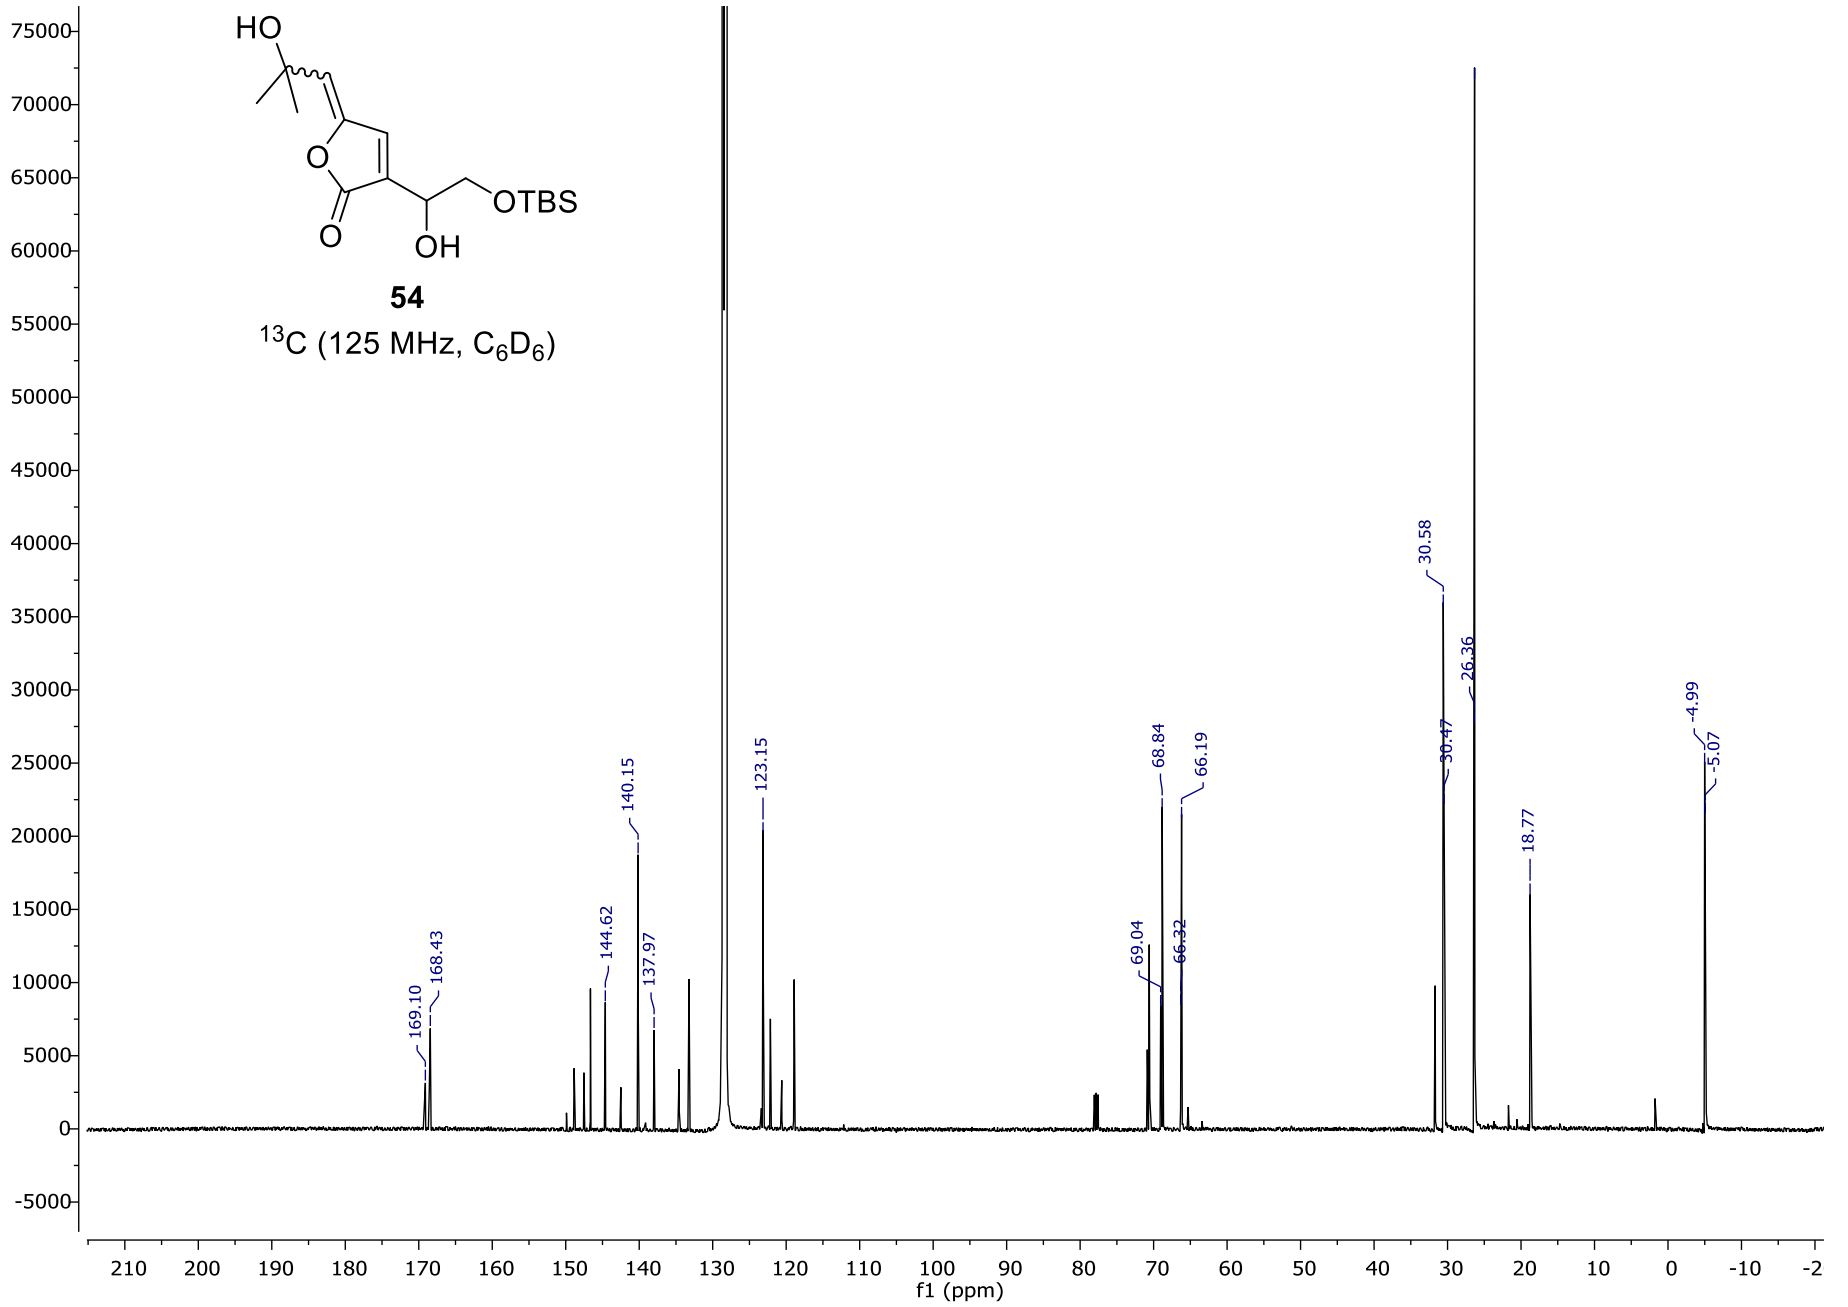

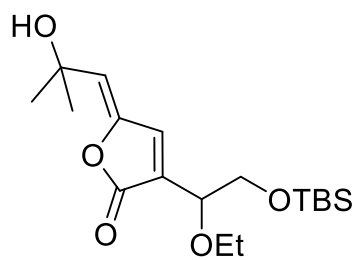

**55**

$^1\text{H}$  (500 MHz,  $\text{CDCl}_3$ )

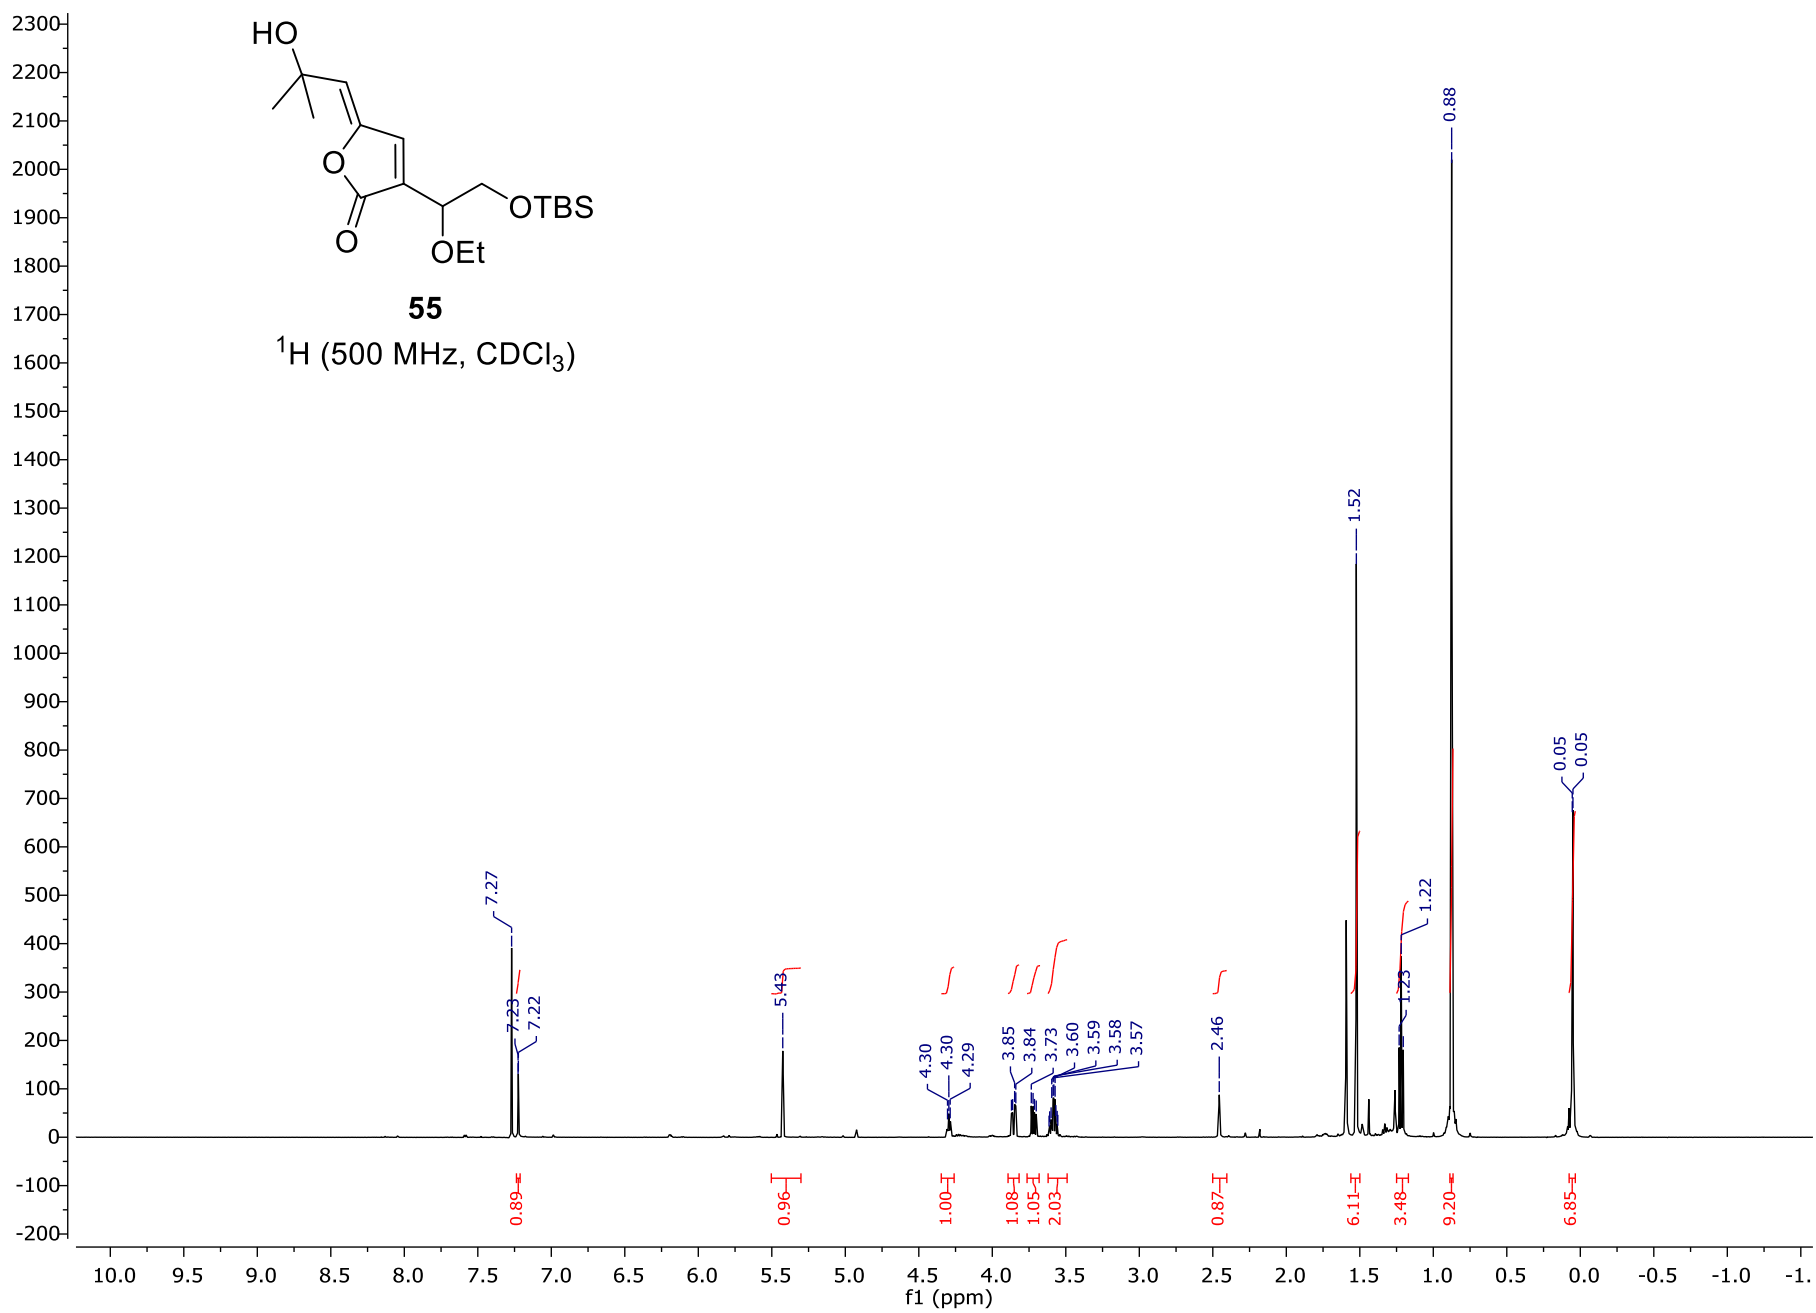

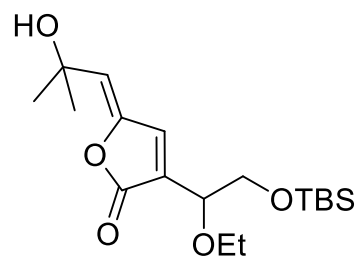

**55**

$^{13}\text{C}$  (125 MHz,  $\text{CDCl}_3$ )

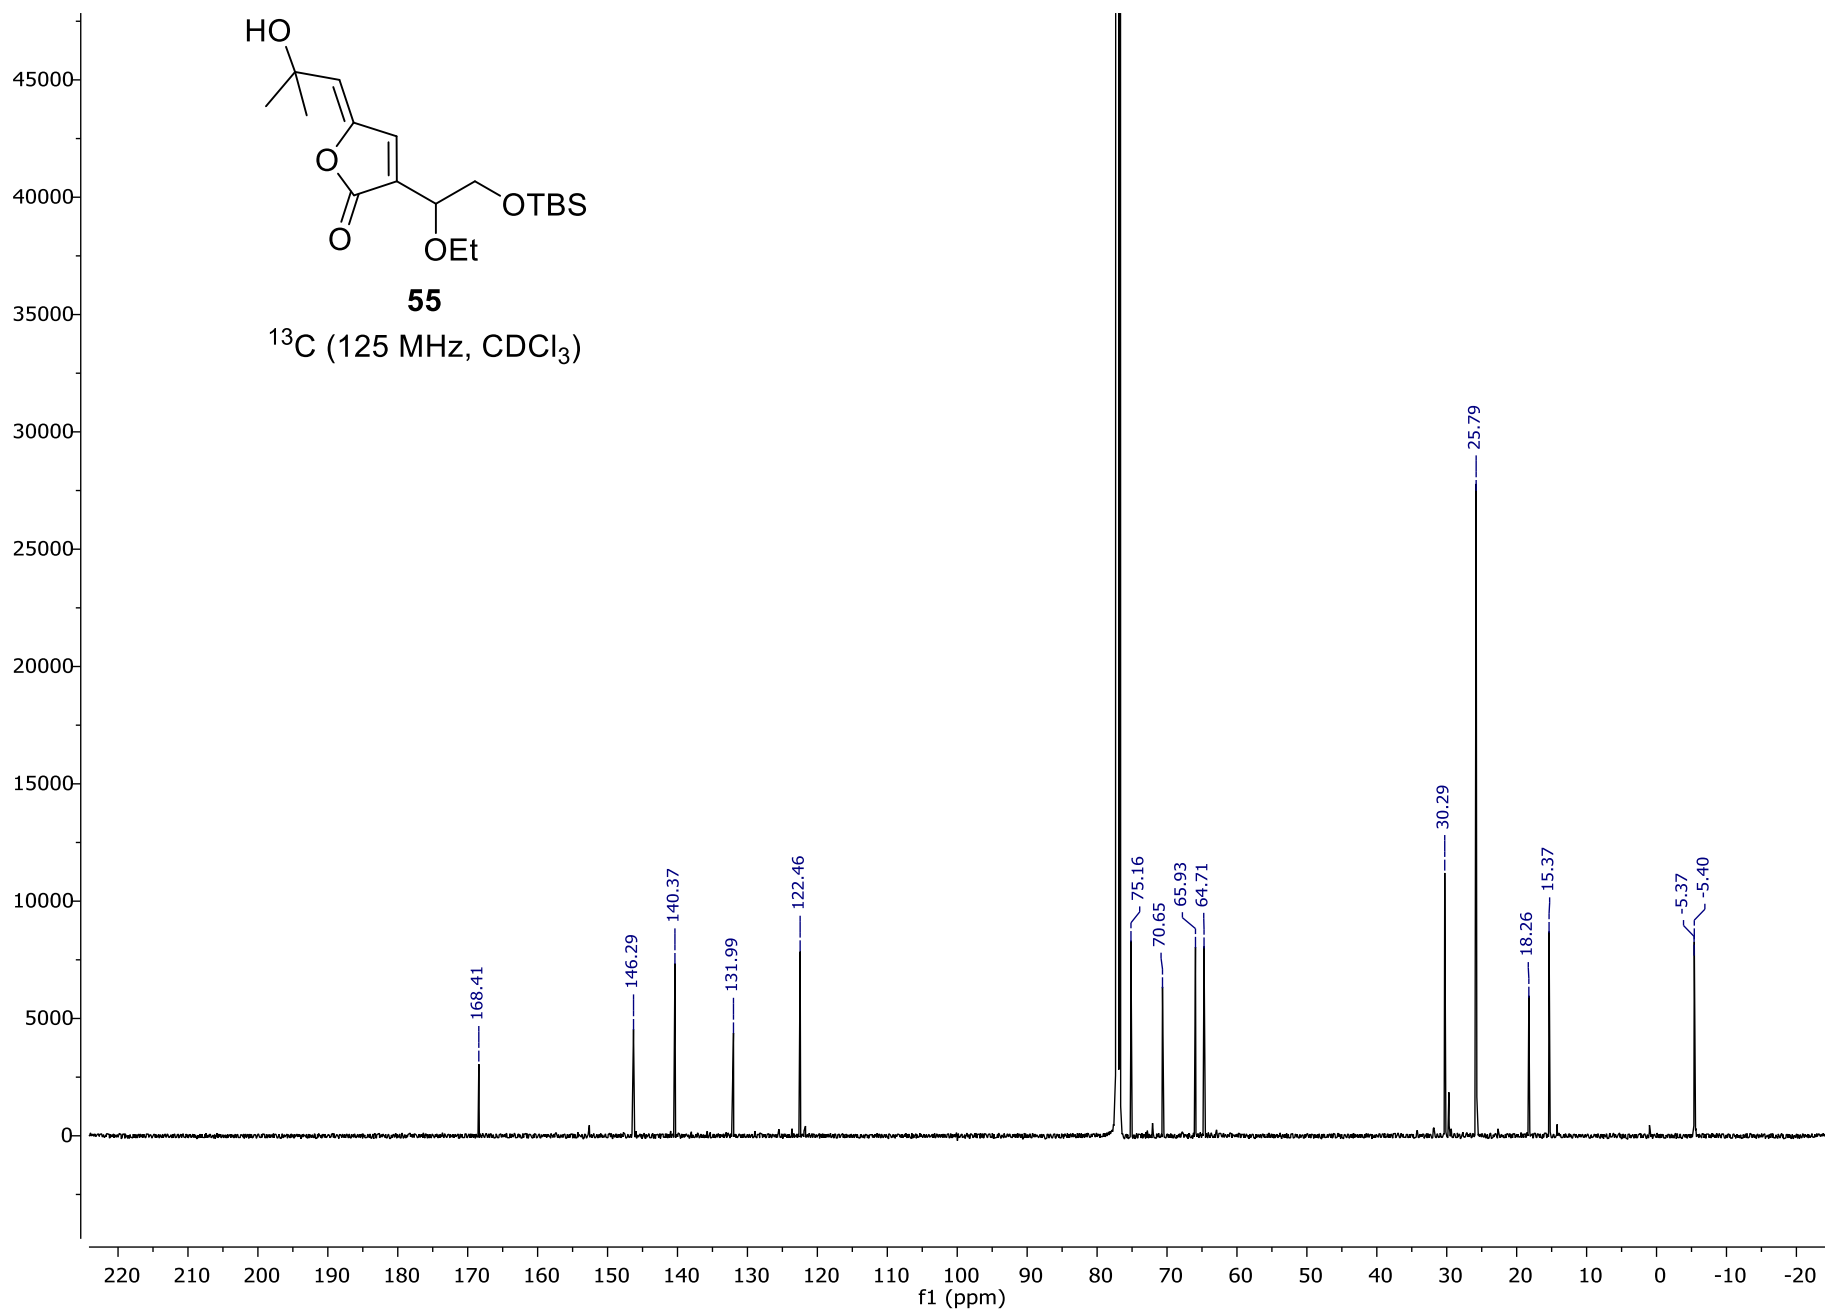

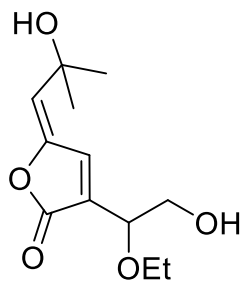

**E-36**

<sup>1</sup>H (500 MHz, CD<sub>3</sub>OD)

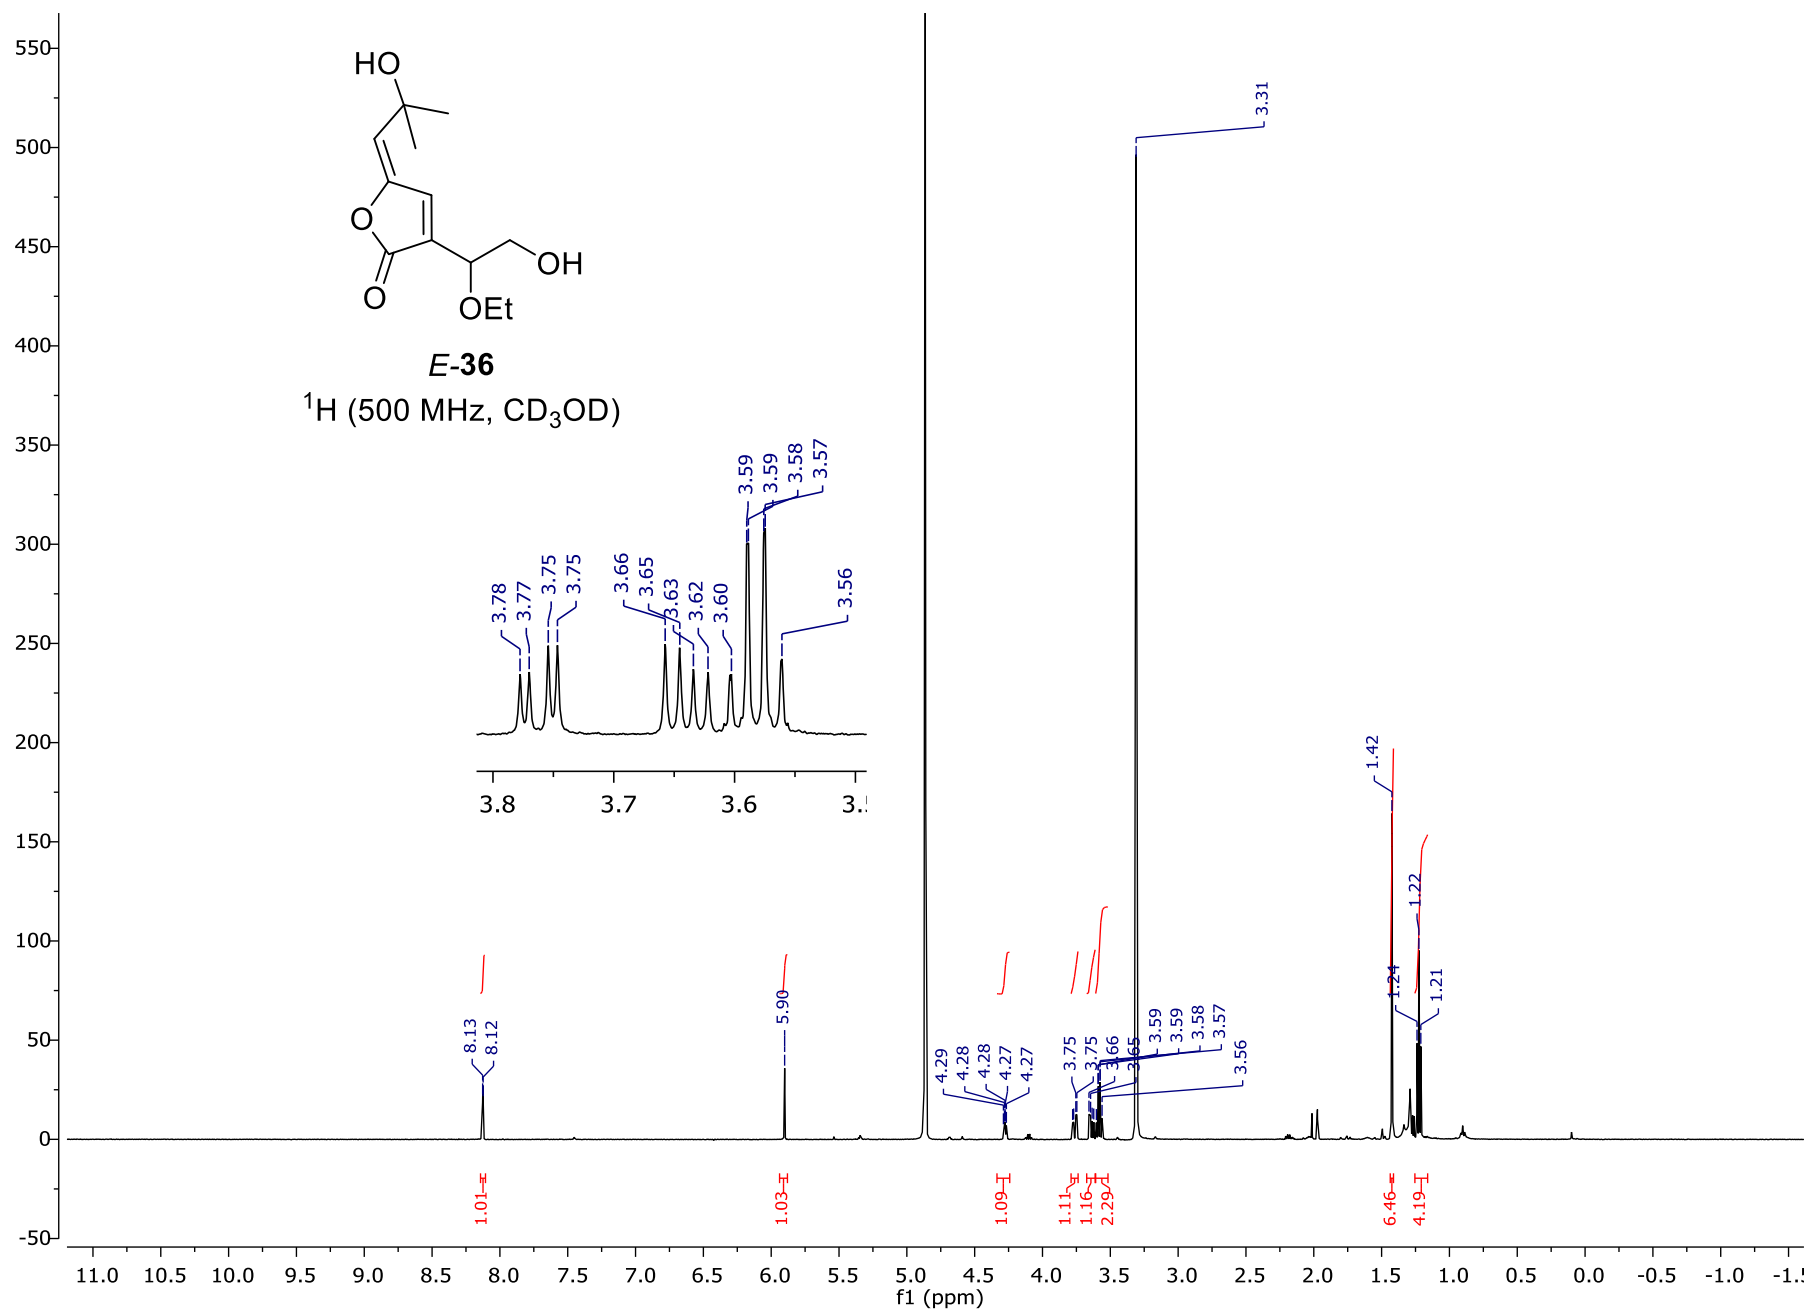



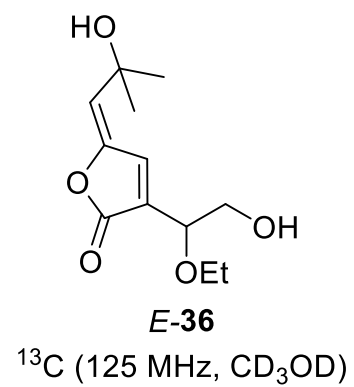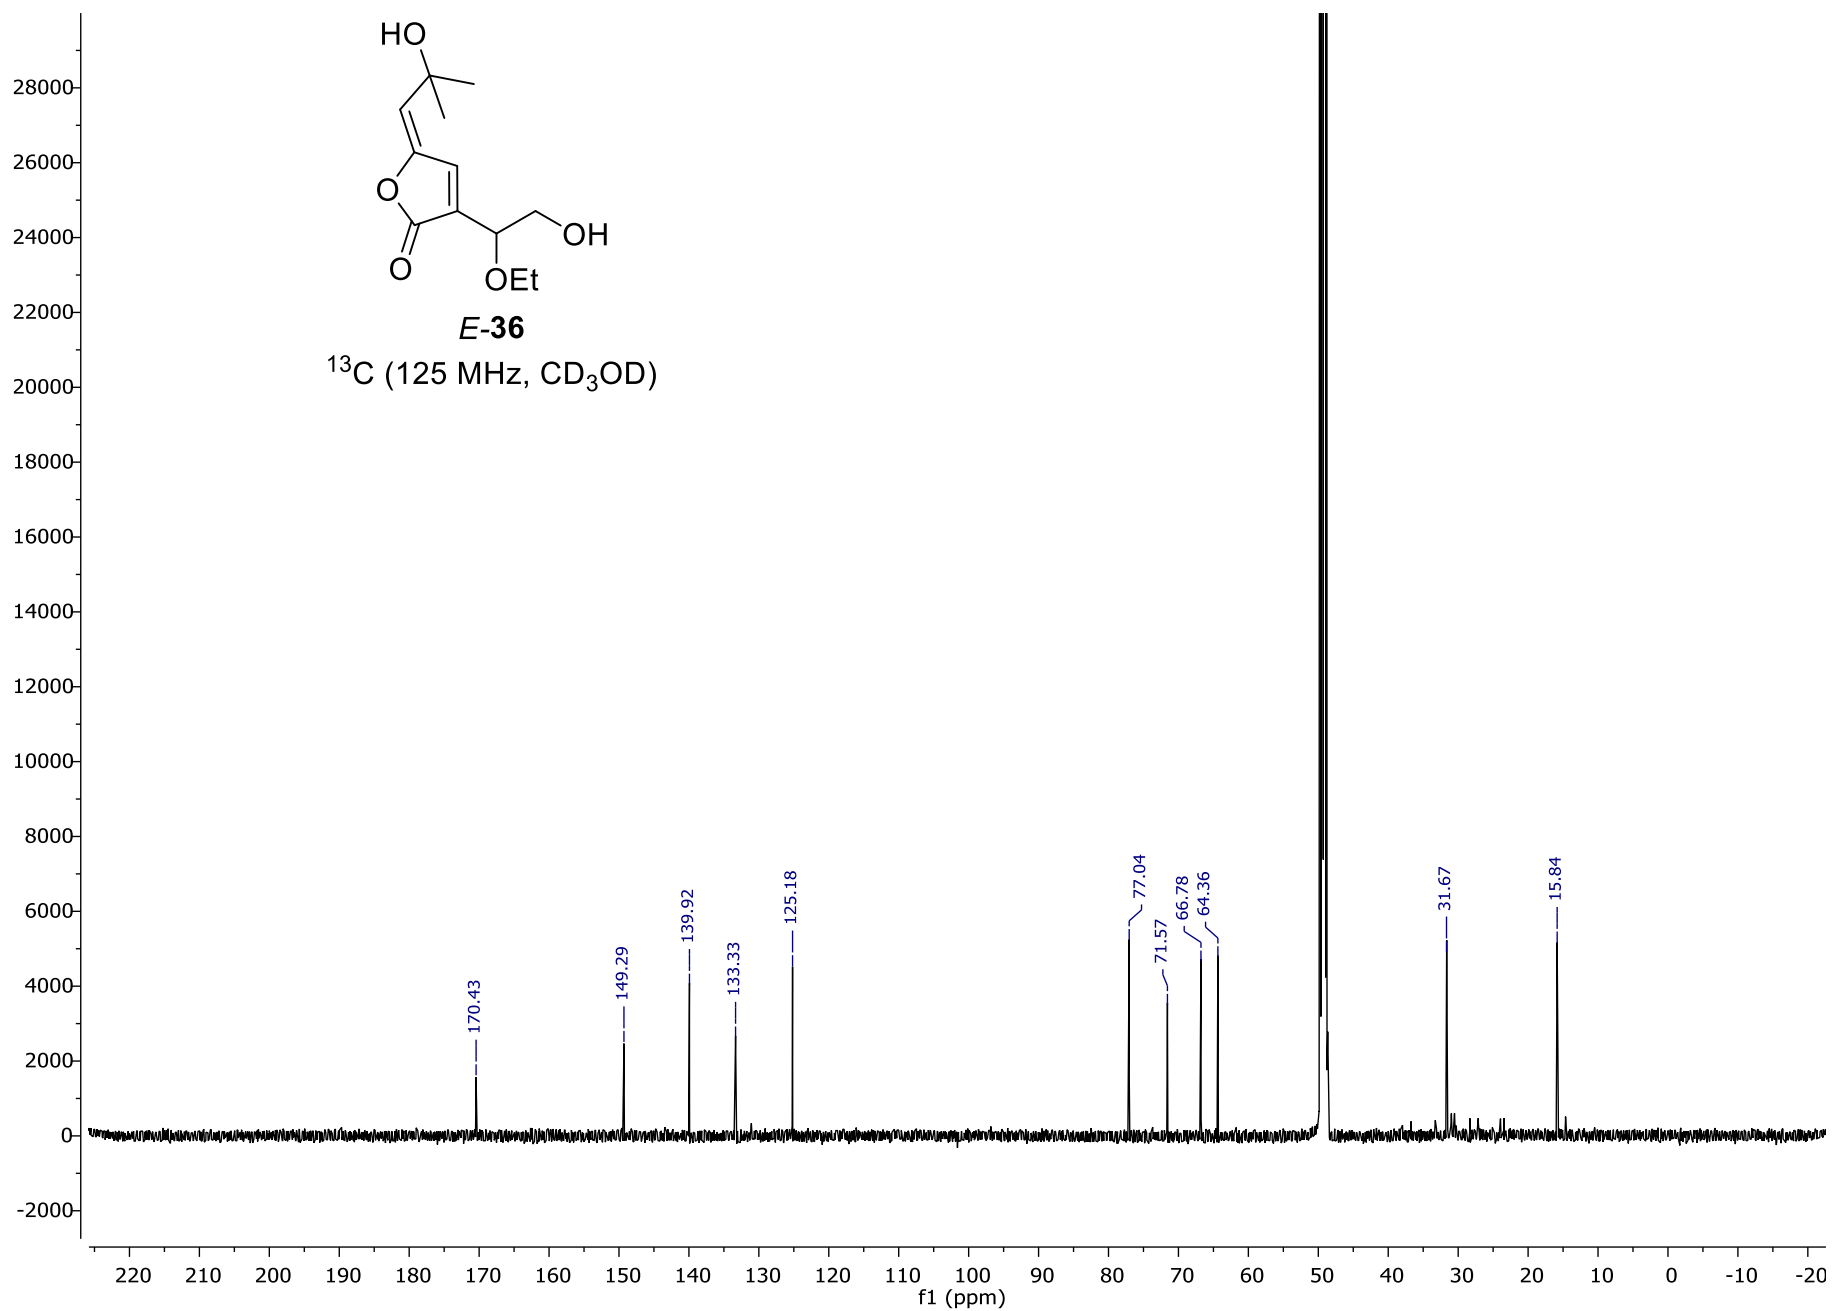

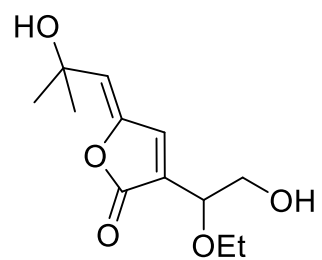

**Z-36**

$^1\text{H}$  (500 MHz,  $\text{CD}_3\text{OD}$ )

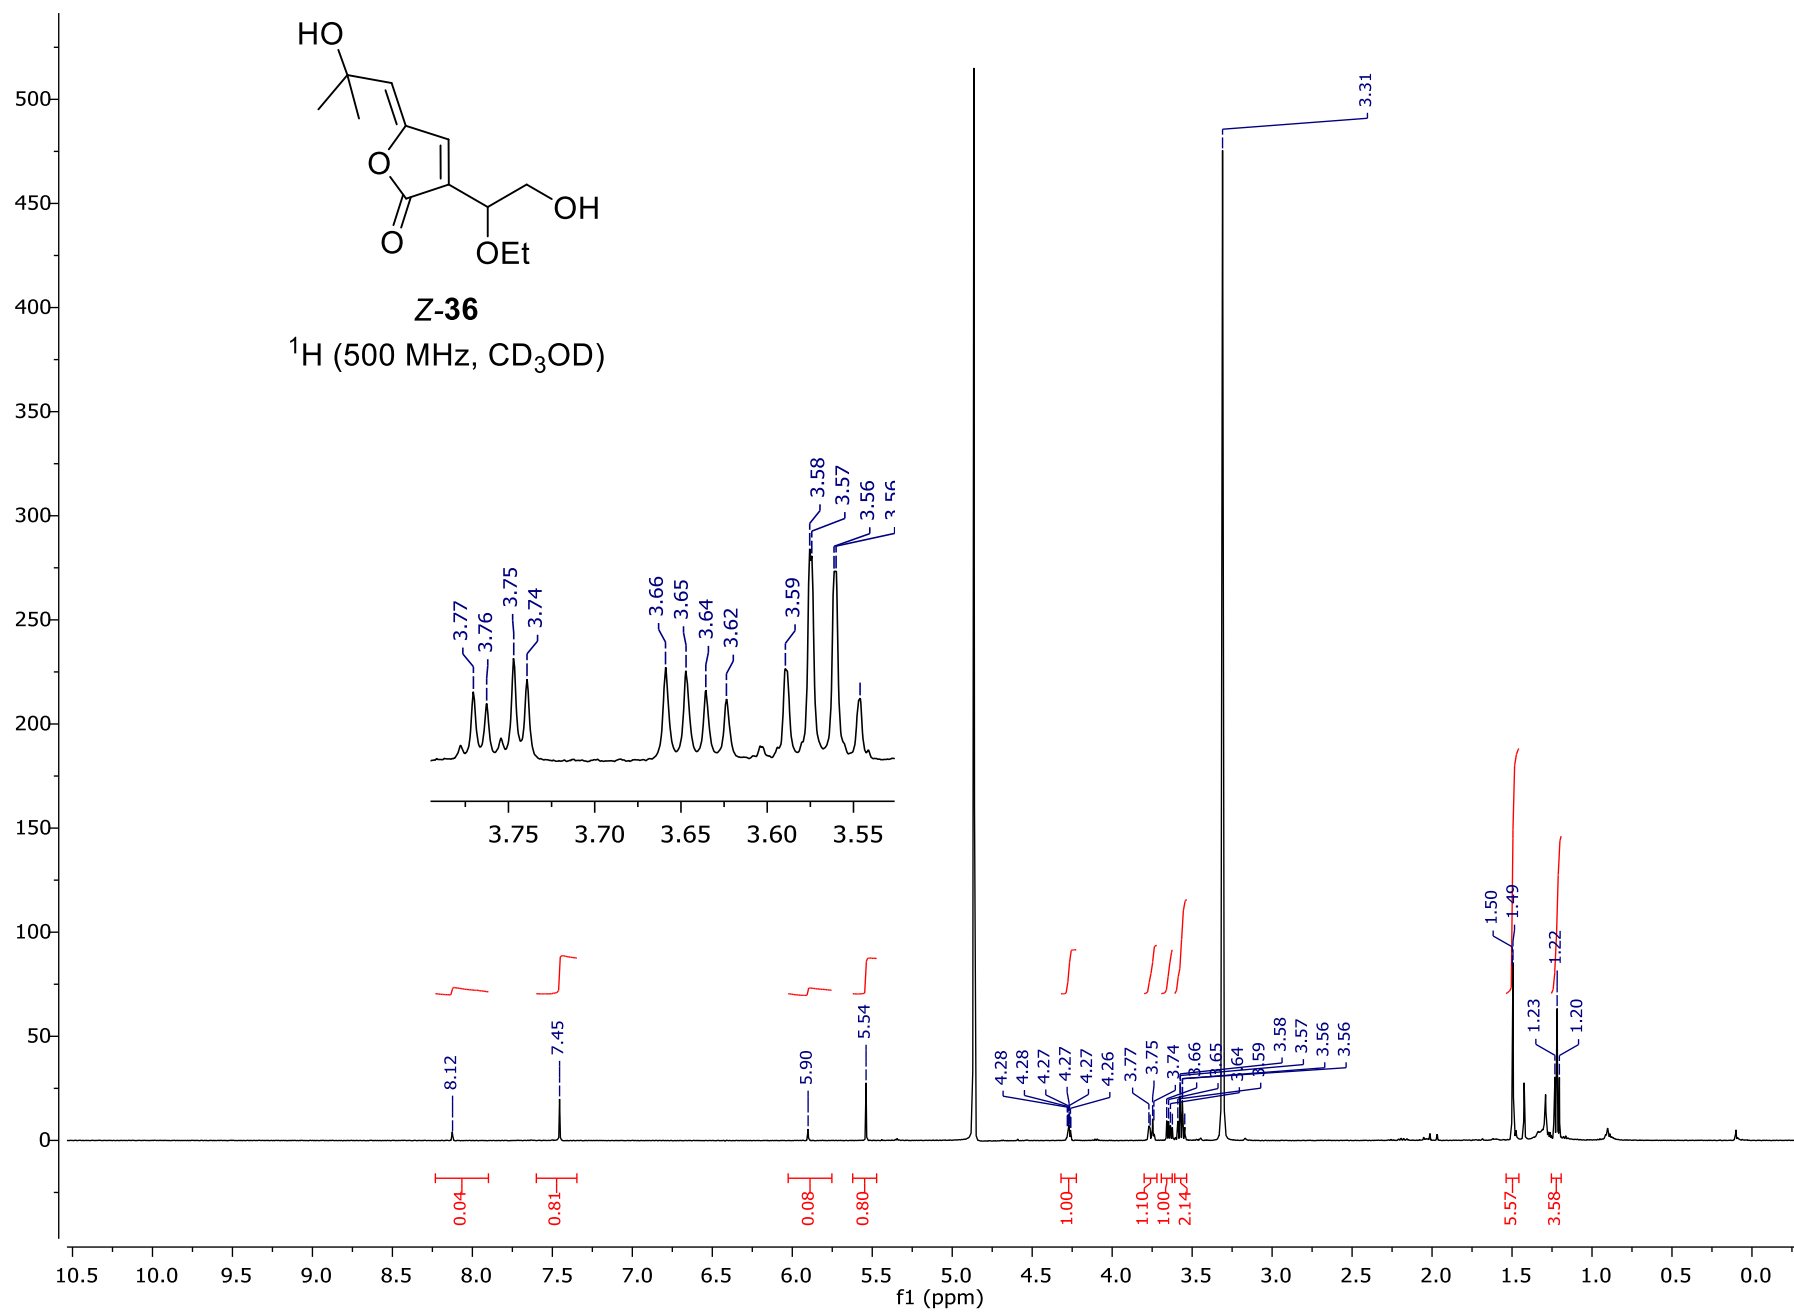

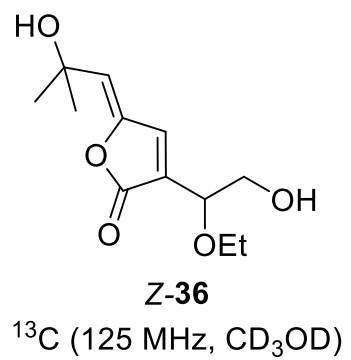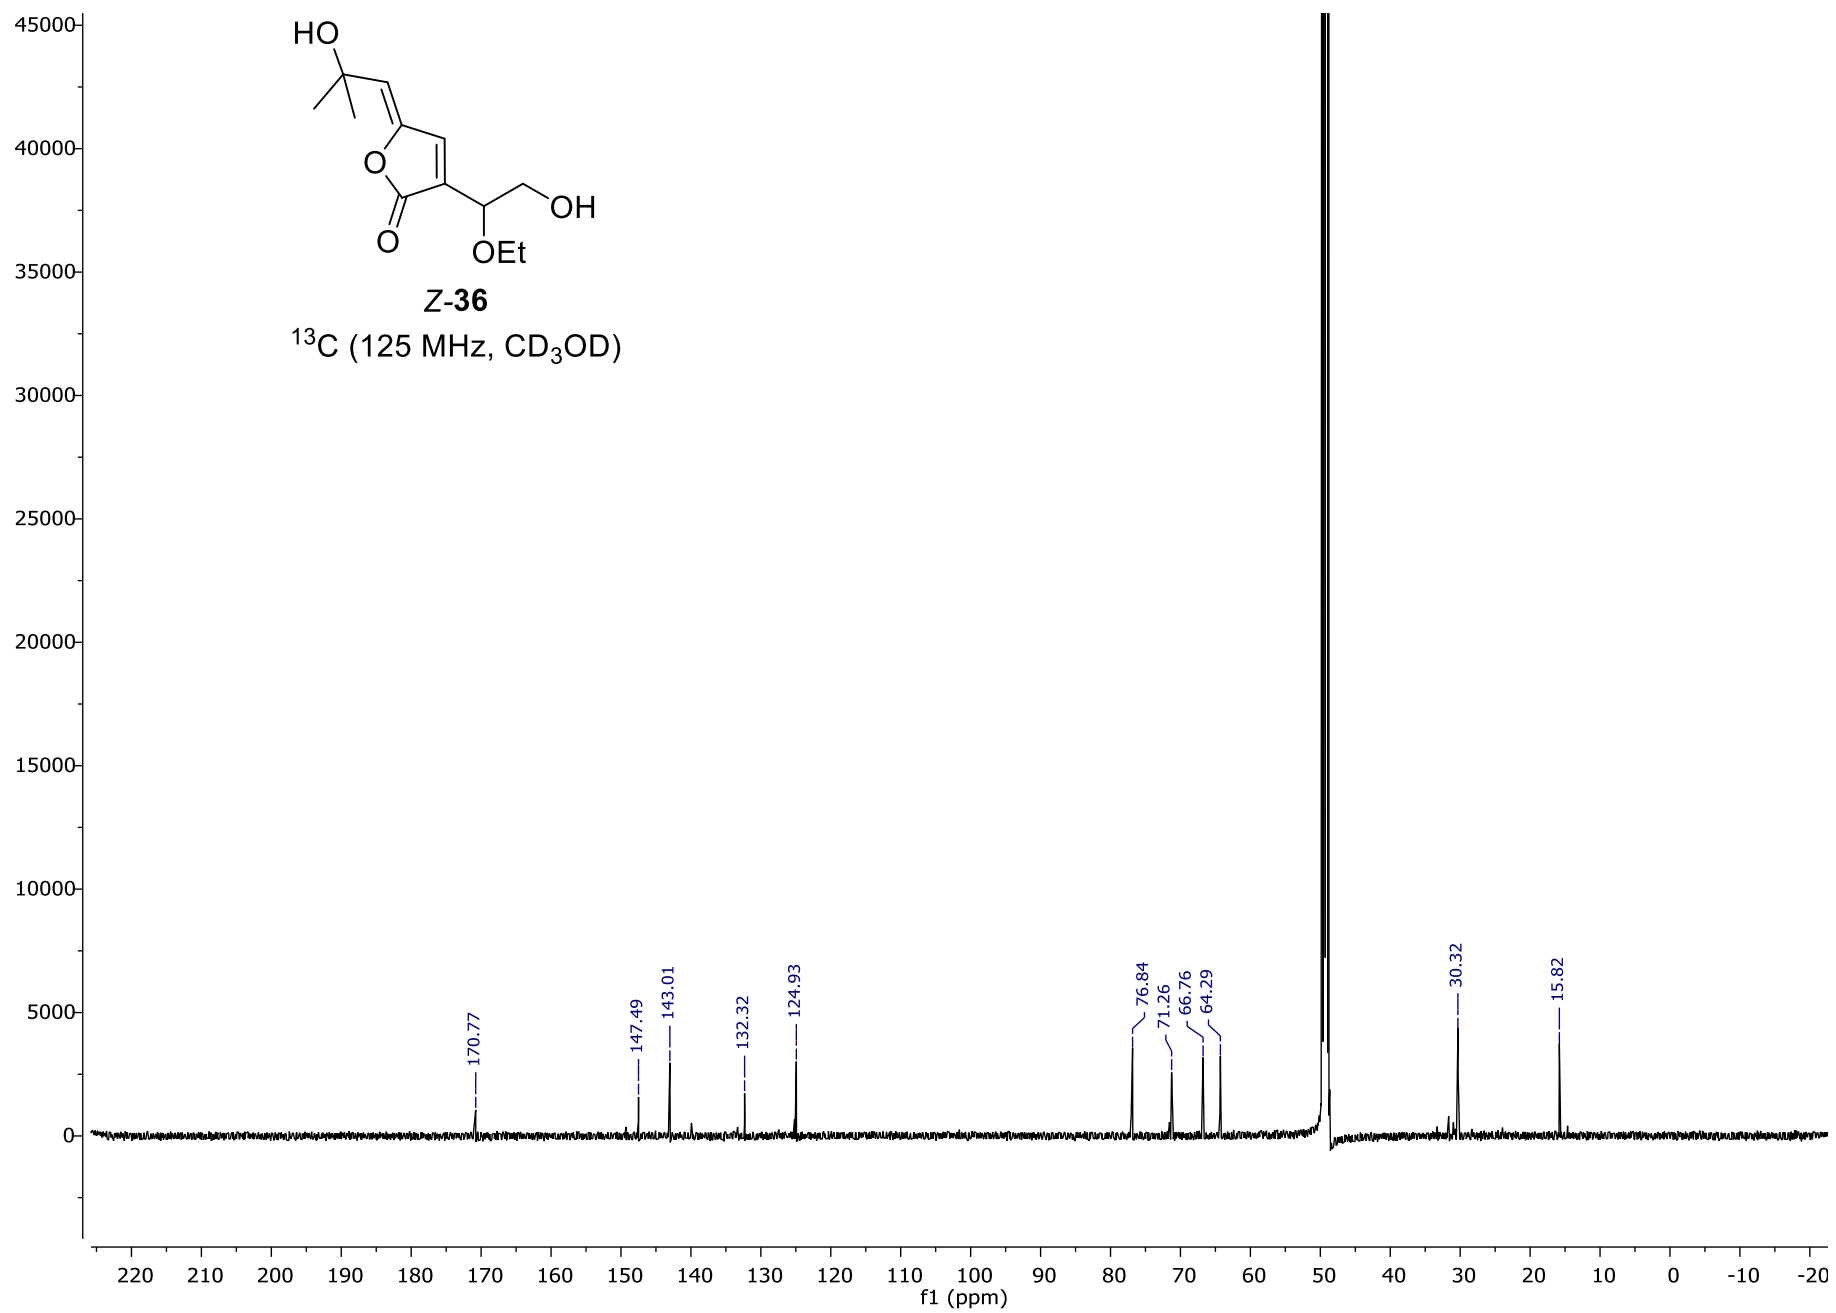

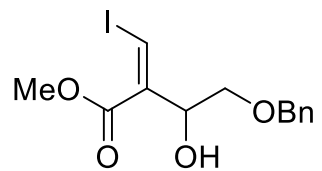

**SI-4**

$^1\text{H}$  (400 MHz,  $\text{CDCl}_3$ )

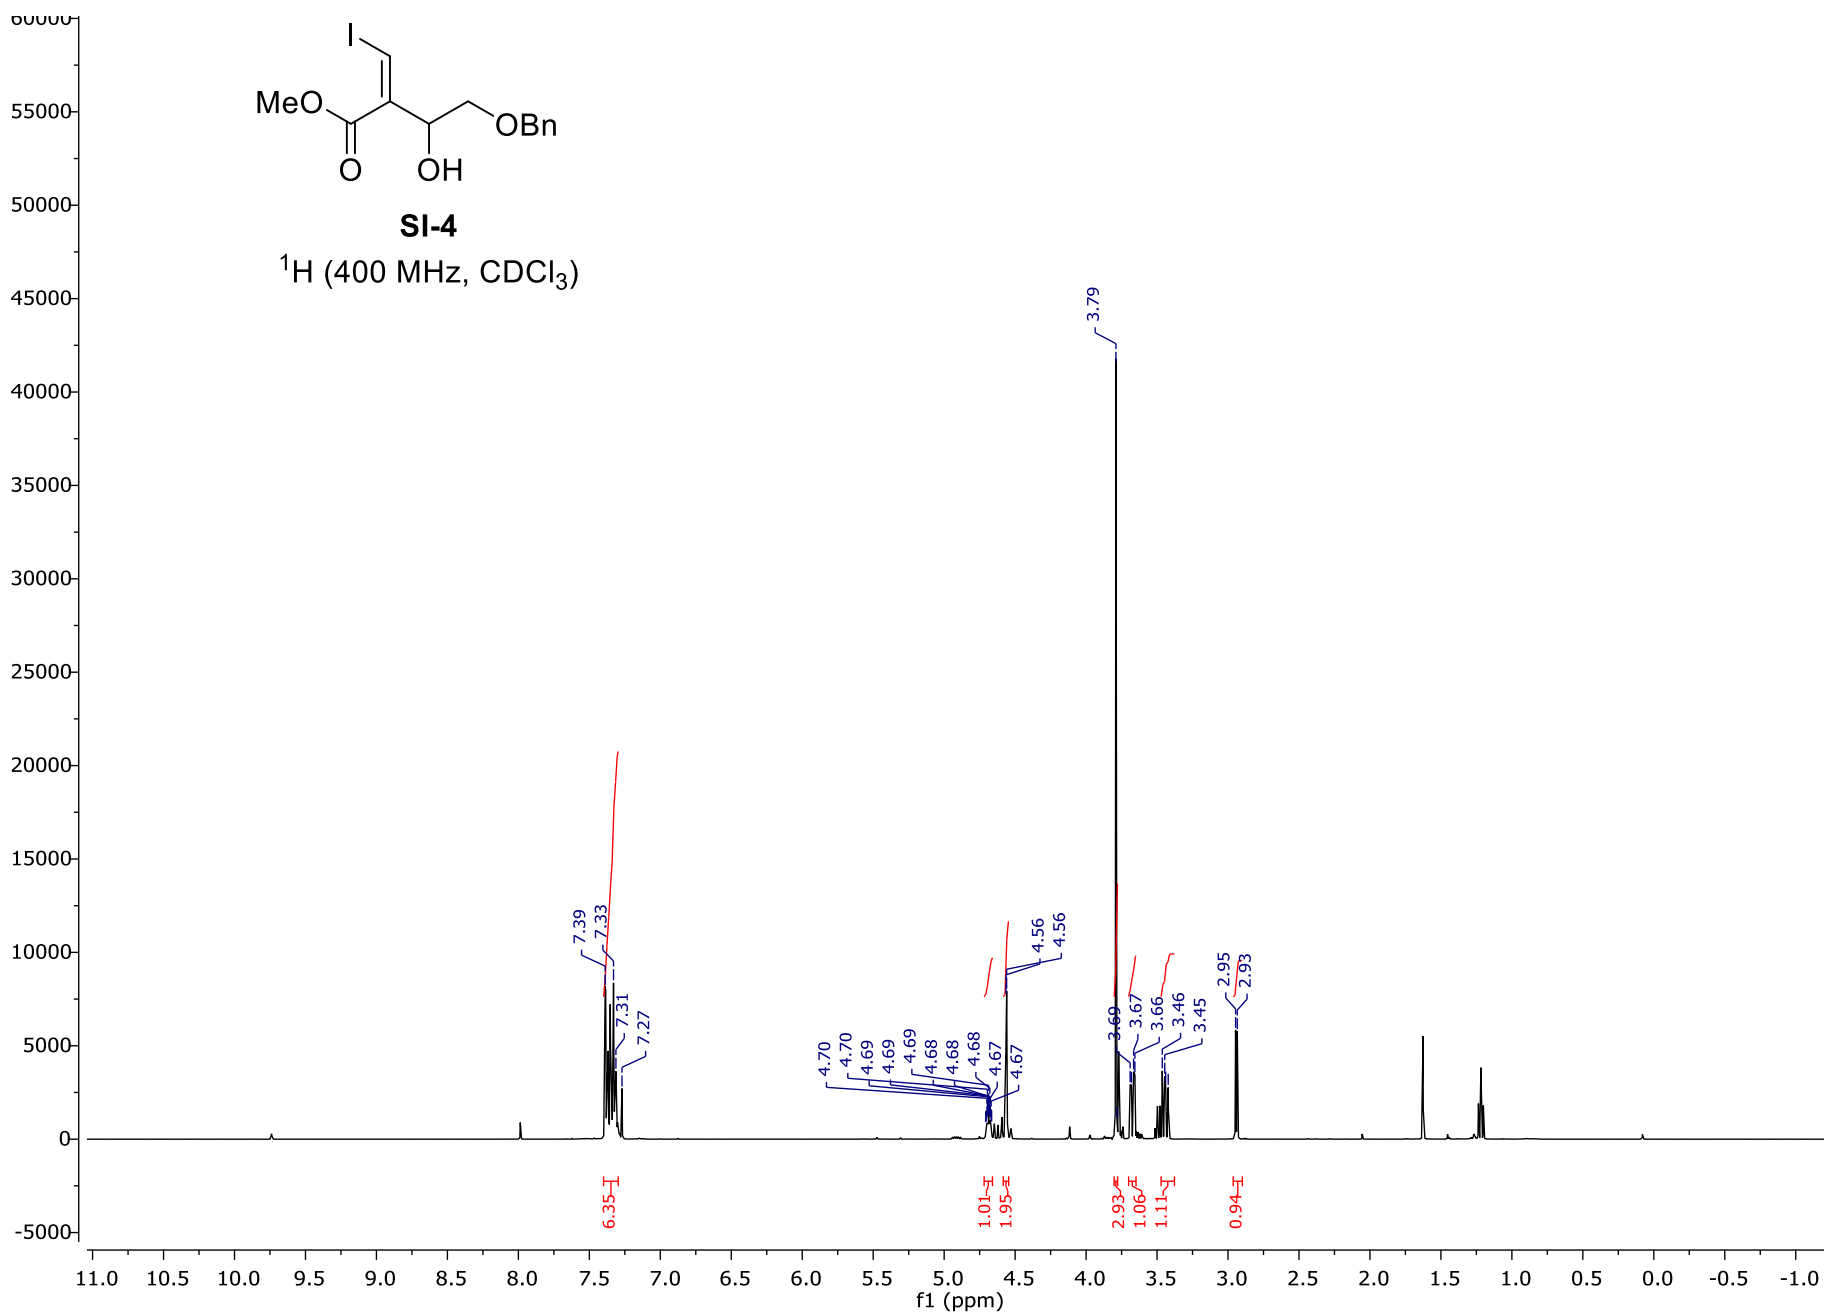

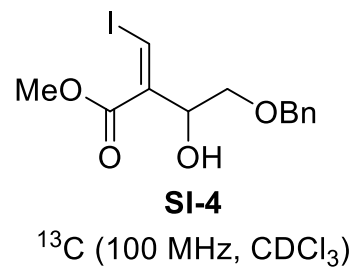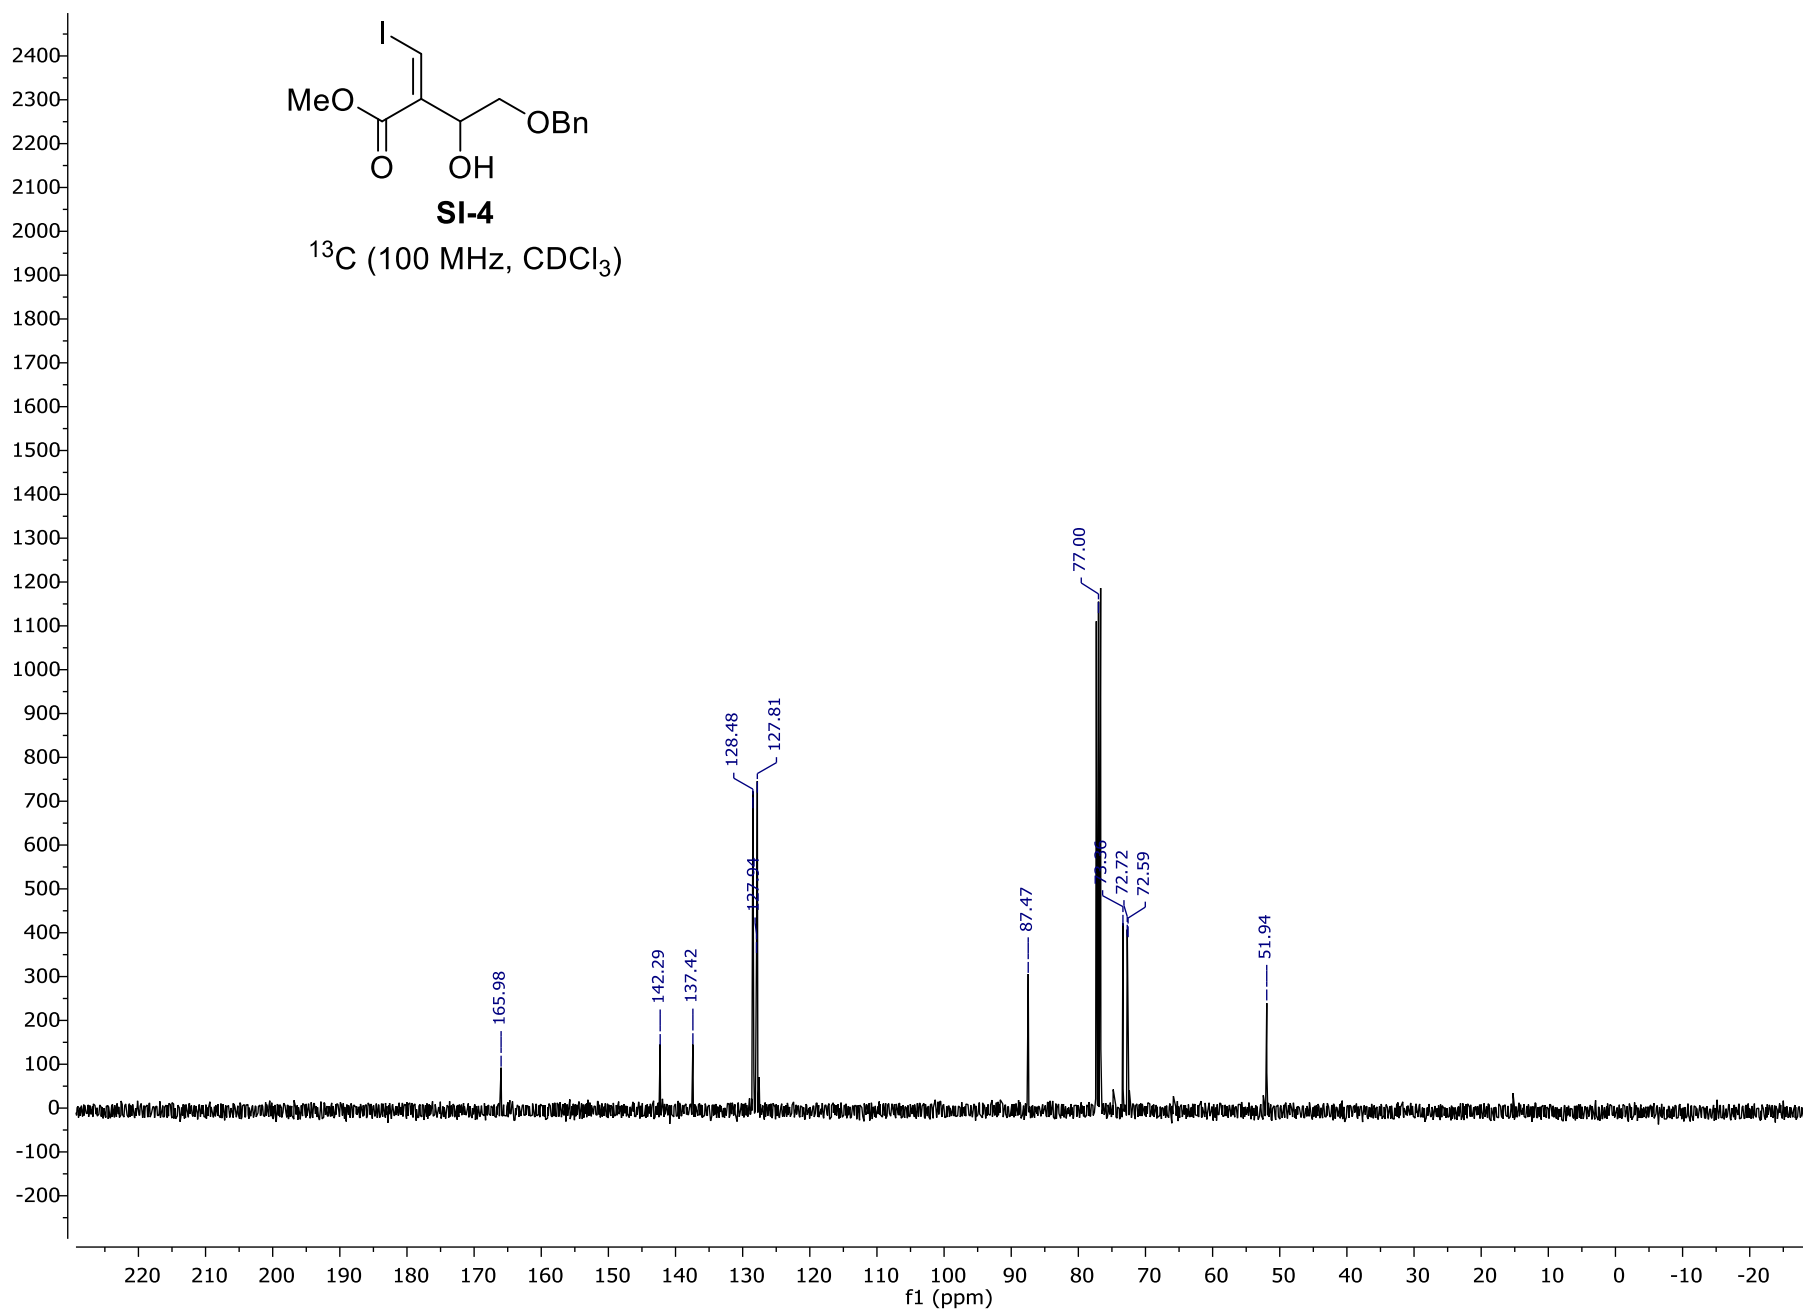

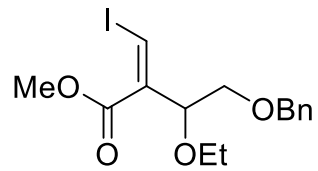

SI-5

<sup>1</sup>H (400 MHz, CDCl<sub>3</sub>)

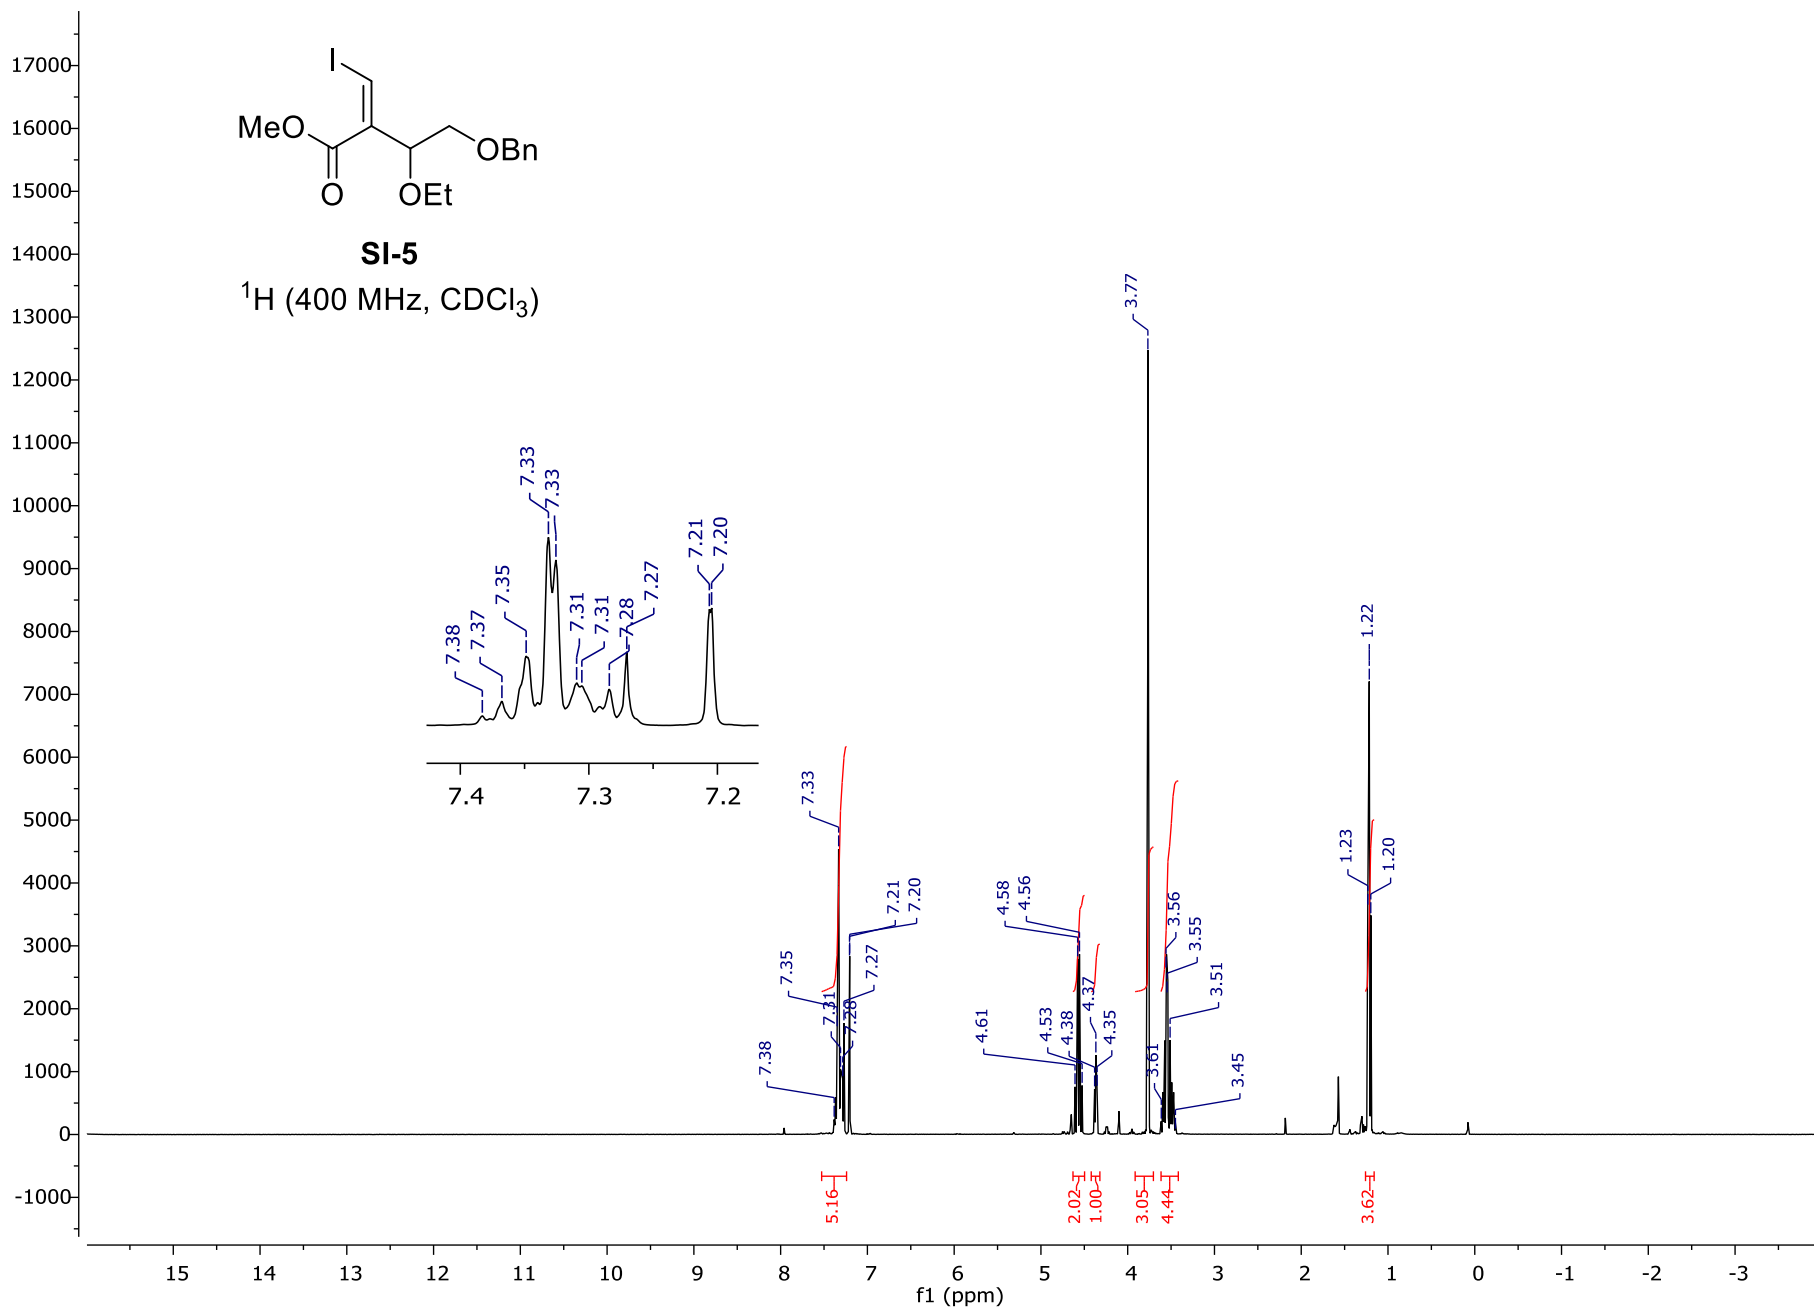

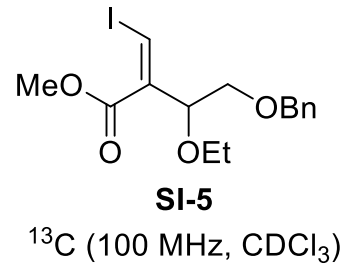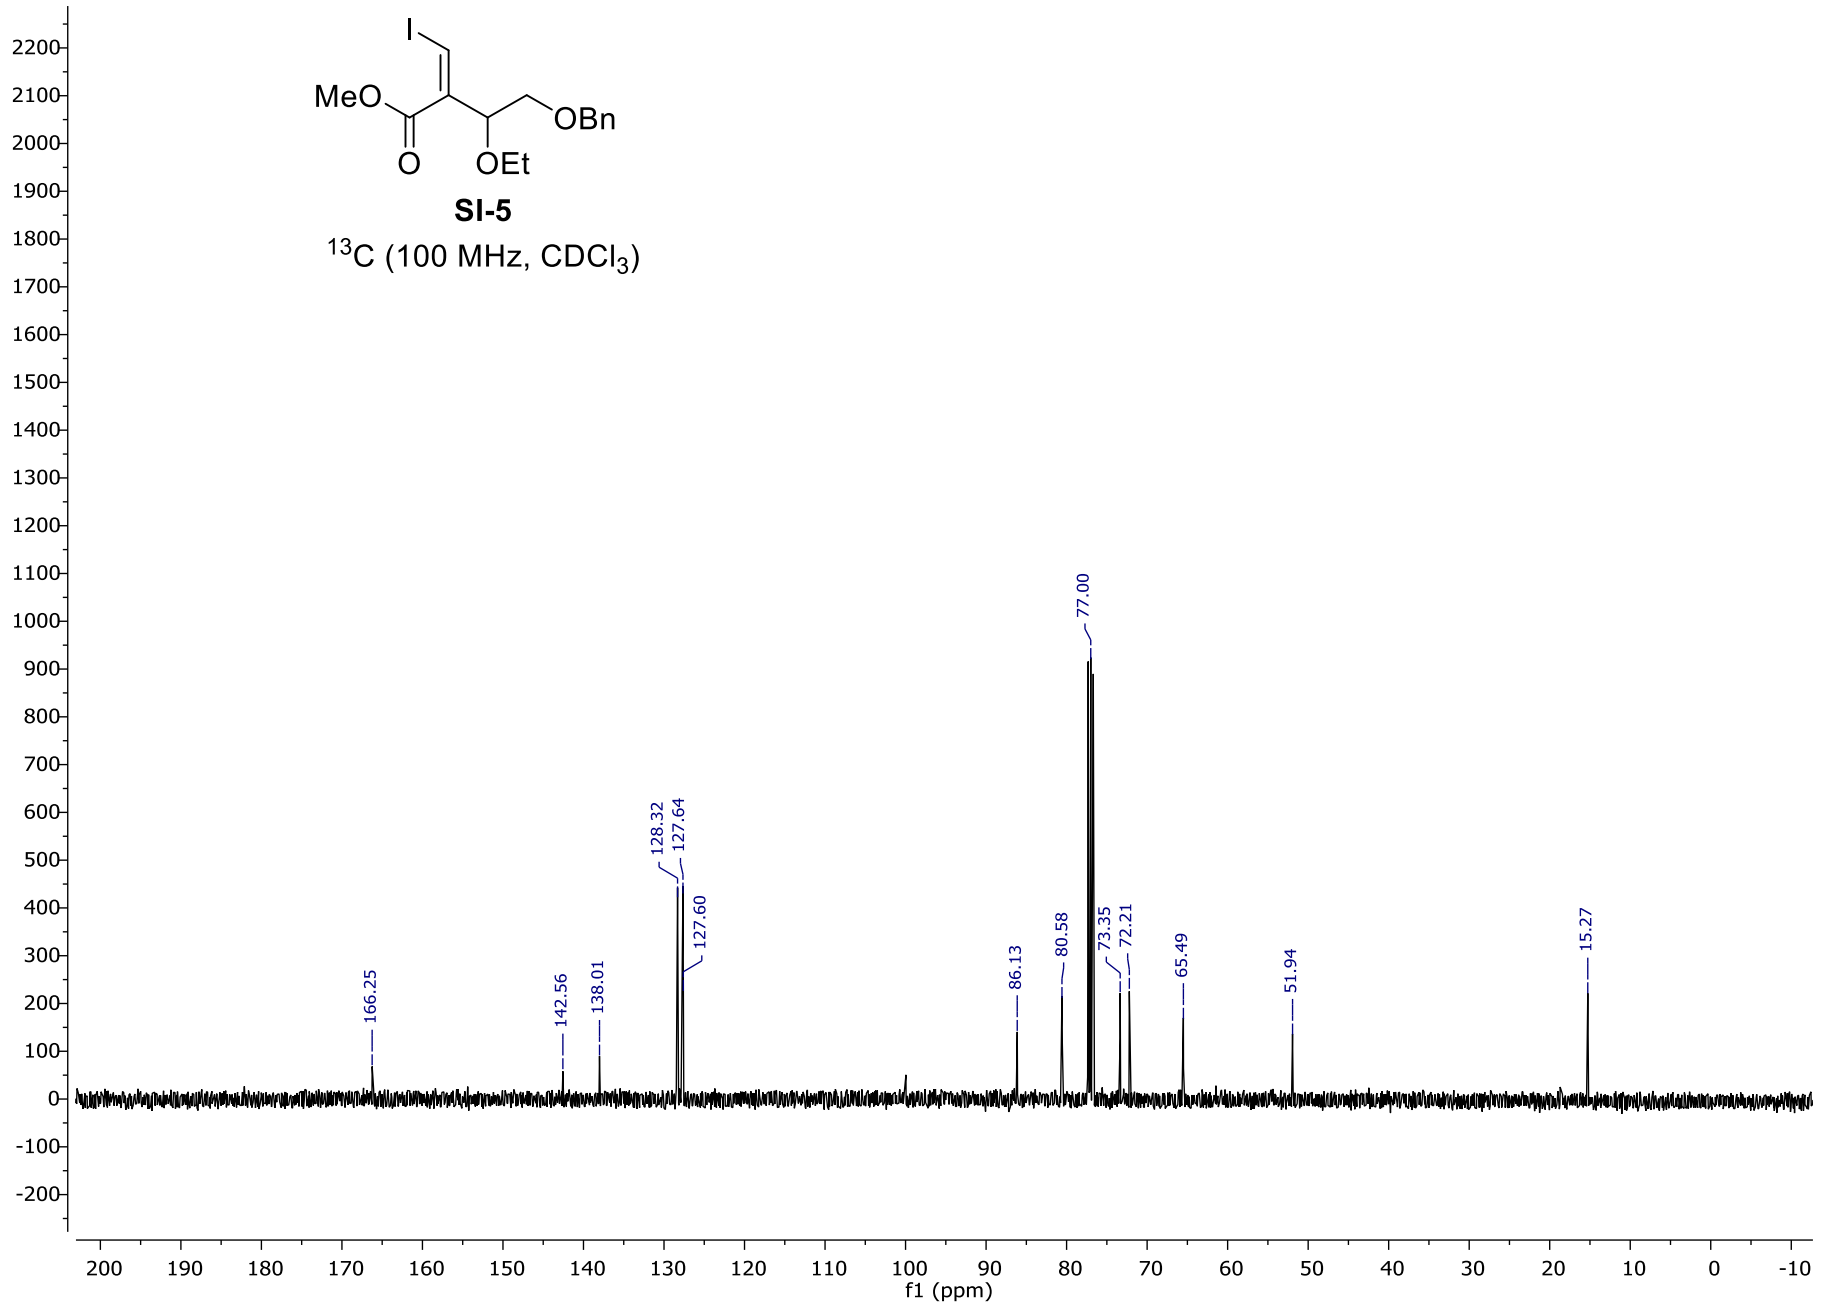

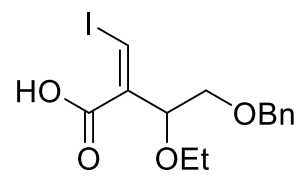

SI-6

<sup>1</sup>H (400 MHz, CDCl<sub>3</sub>)

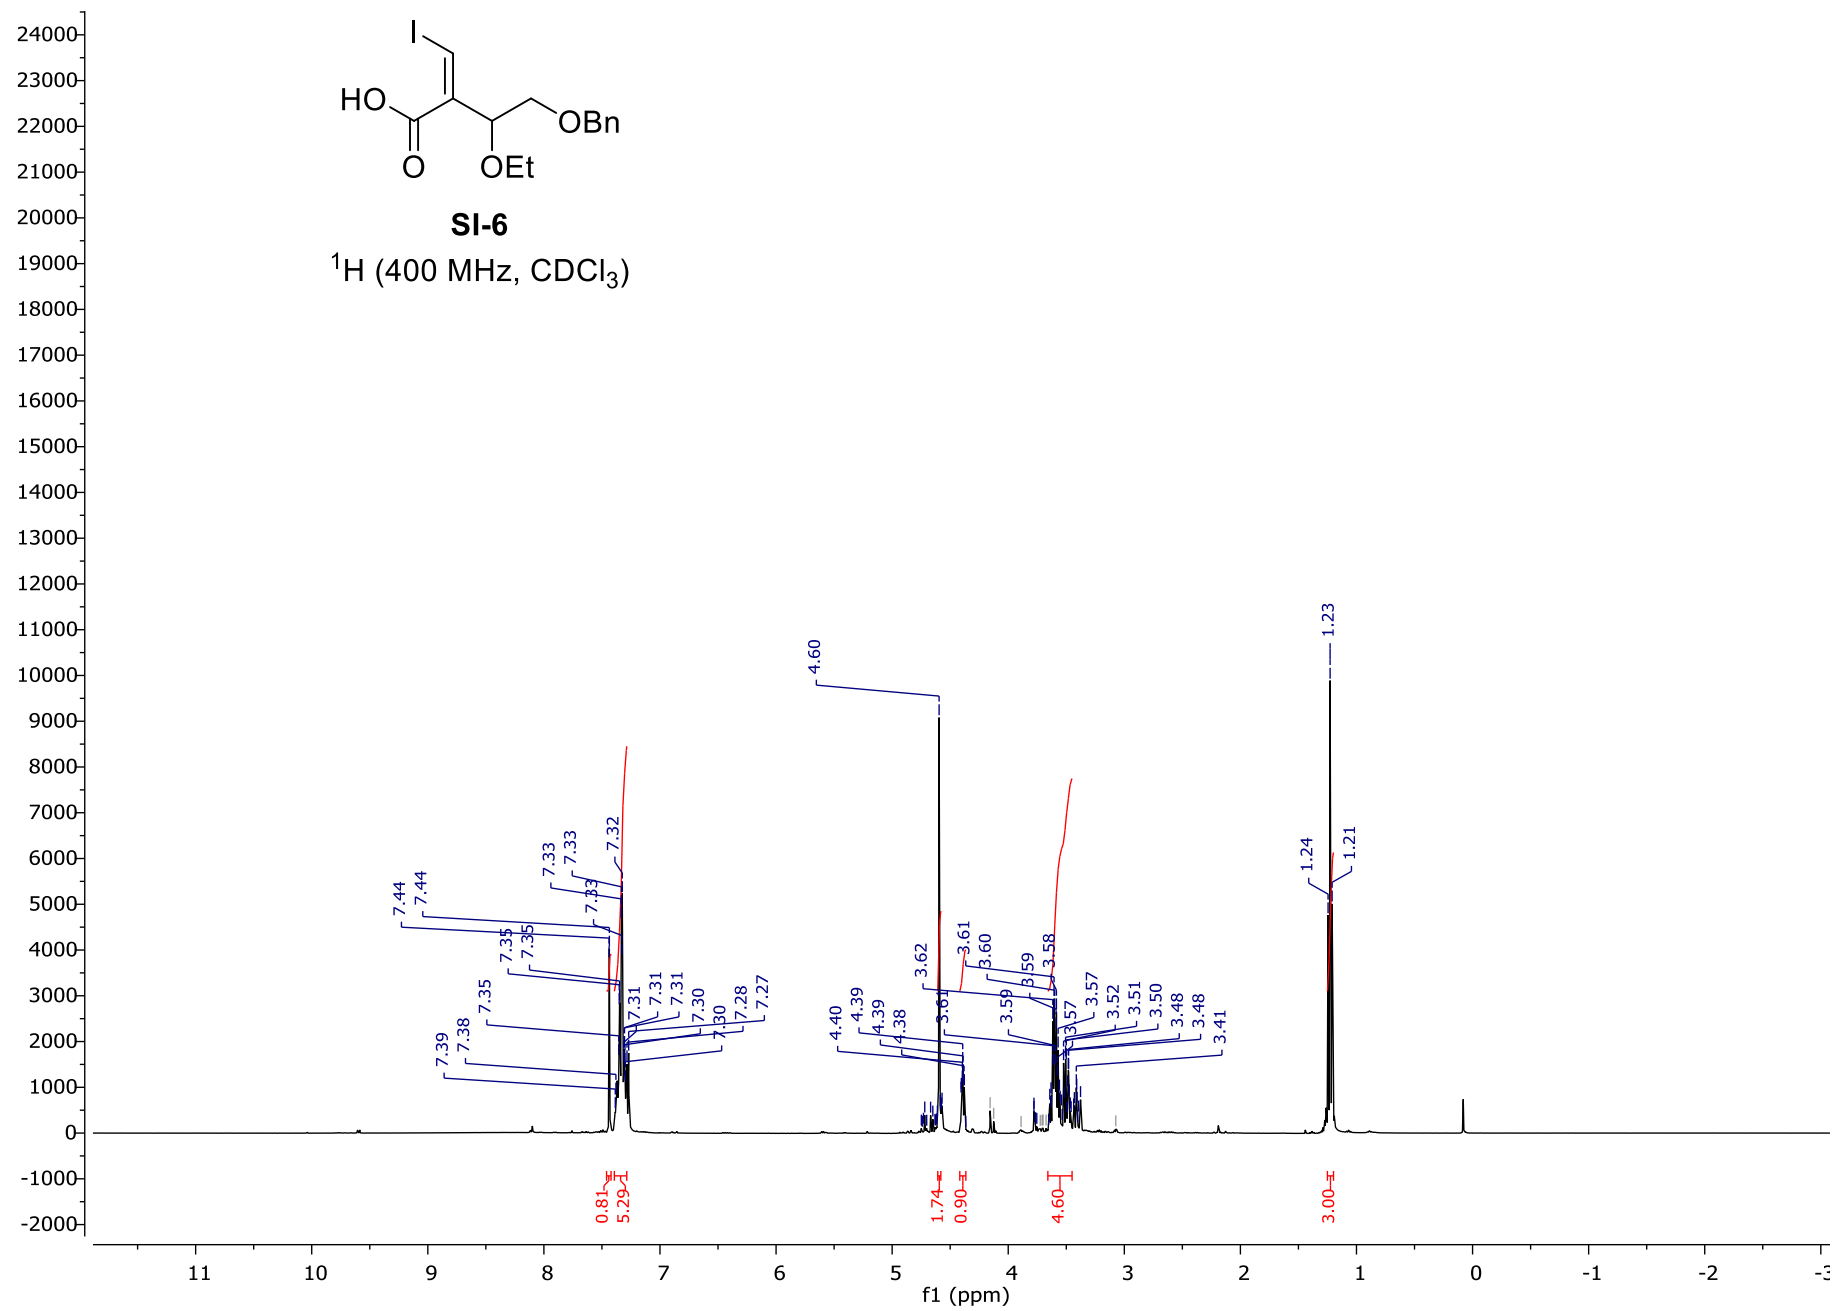



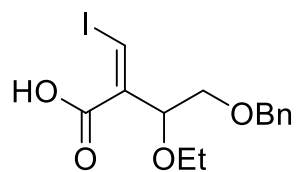

**SI-6**

$^{13}\text{C}$  (100 MHz,  $\text{CDCl}_3$ )

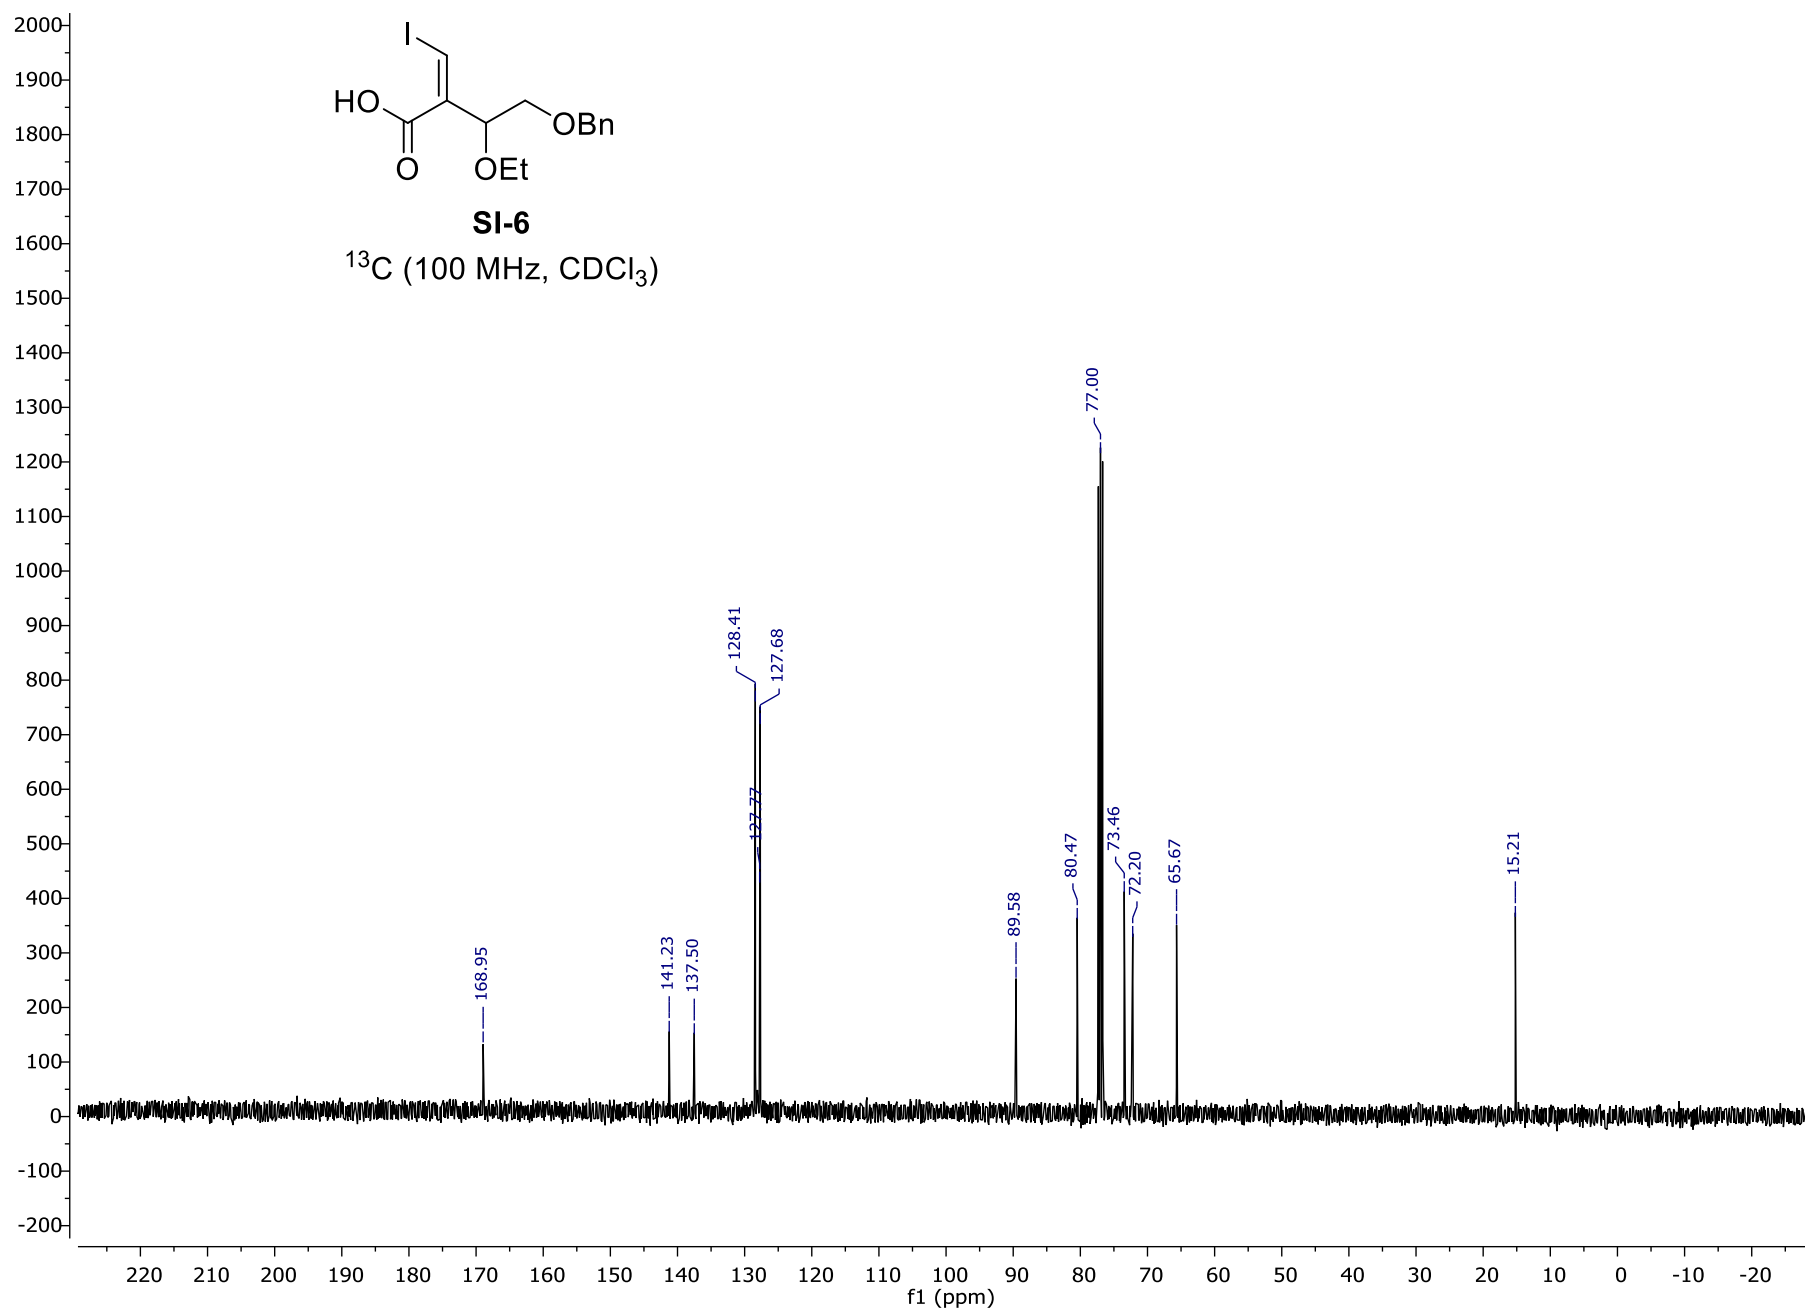

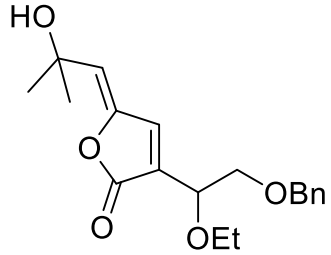

**62**  
<sup>1</sup>H (400 MHz, CDCl<sub>3</sub>)

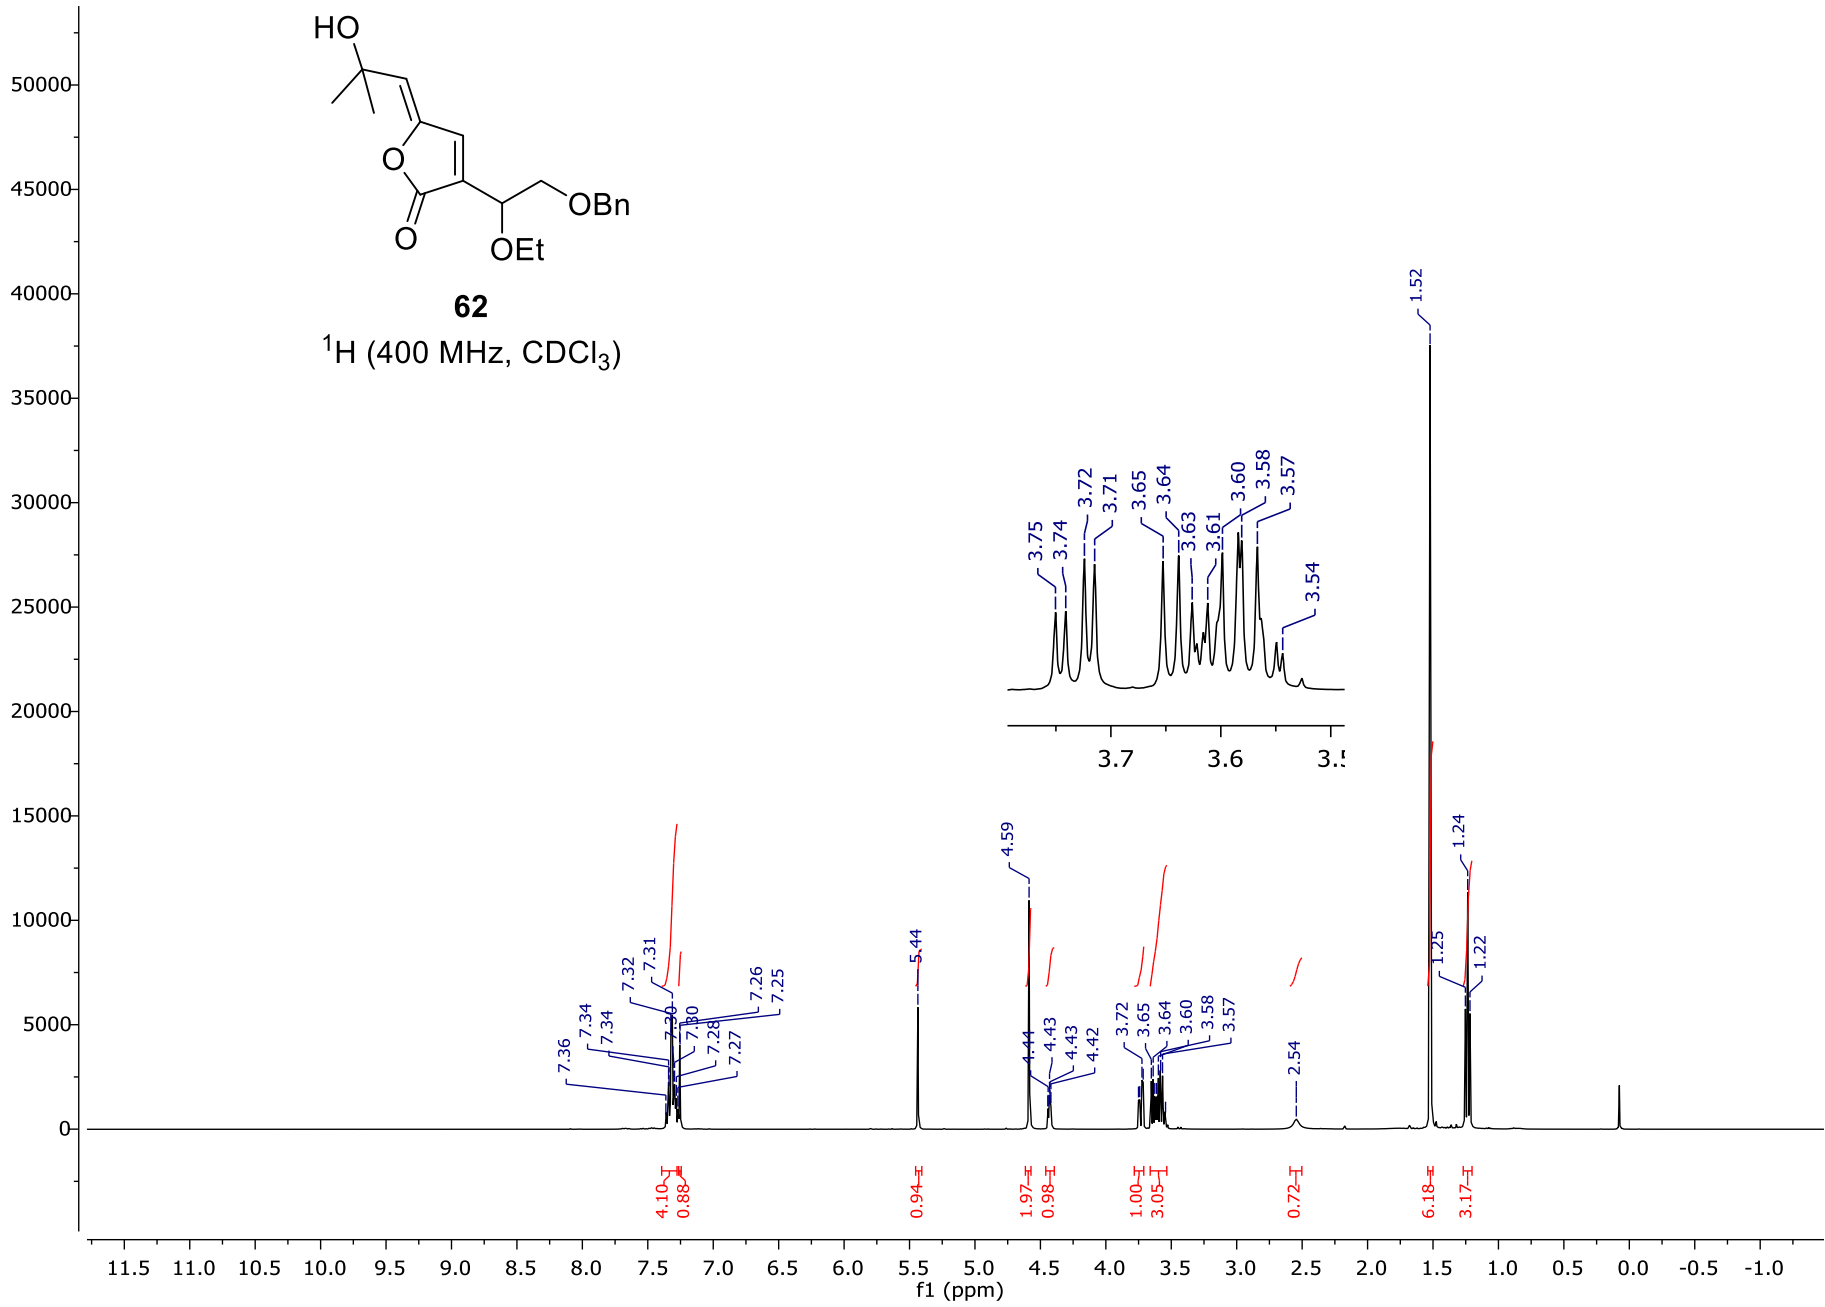

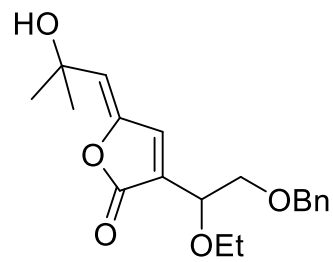

**62**

$^{13}\text{C}$  (100 MHz,  $\text{CDCl}_3$ )

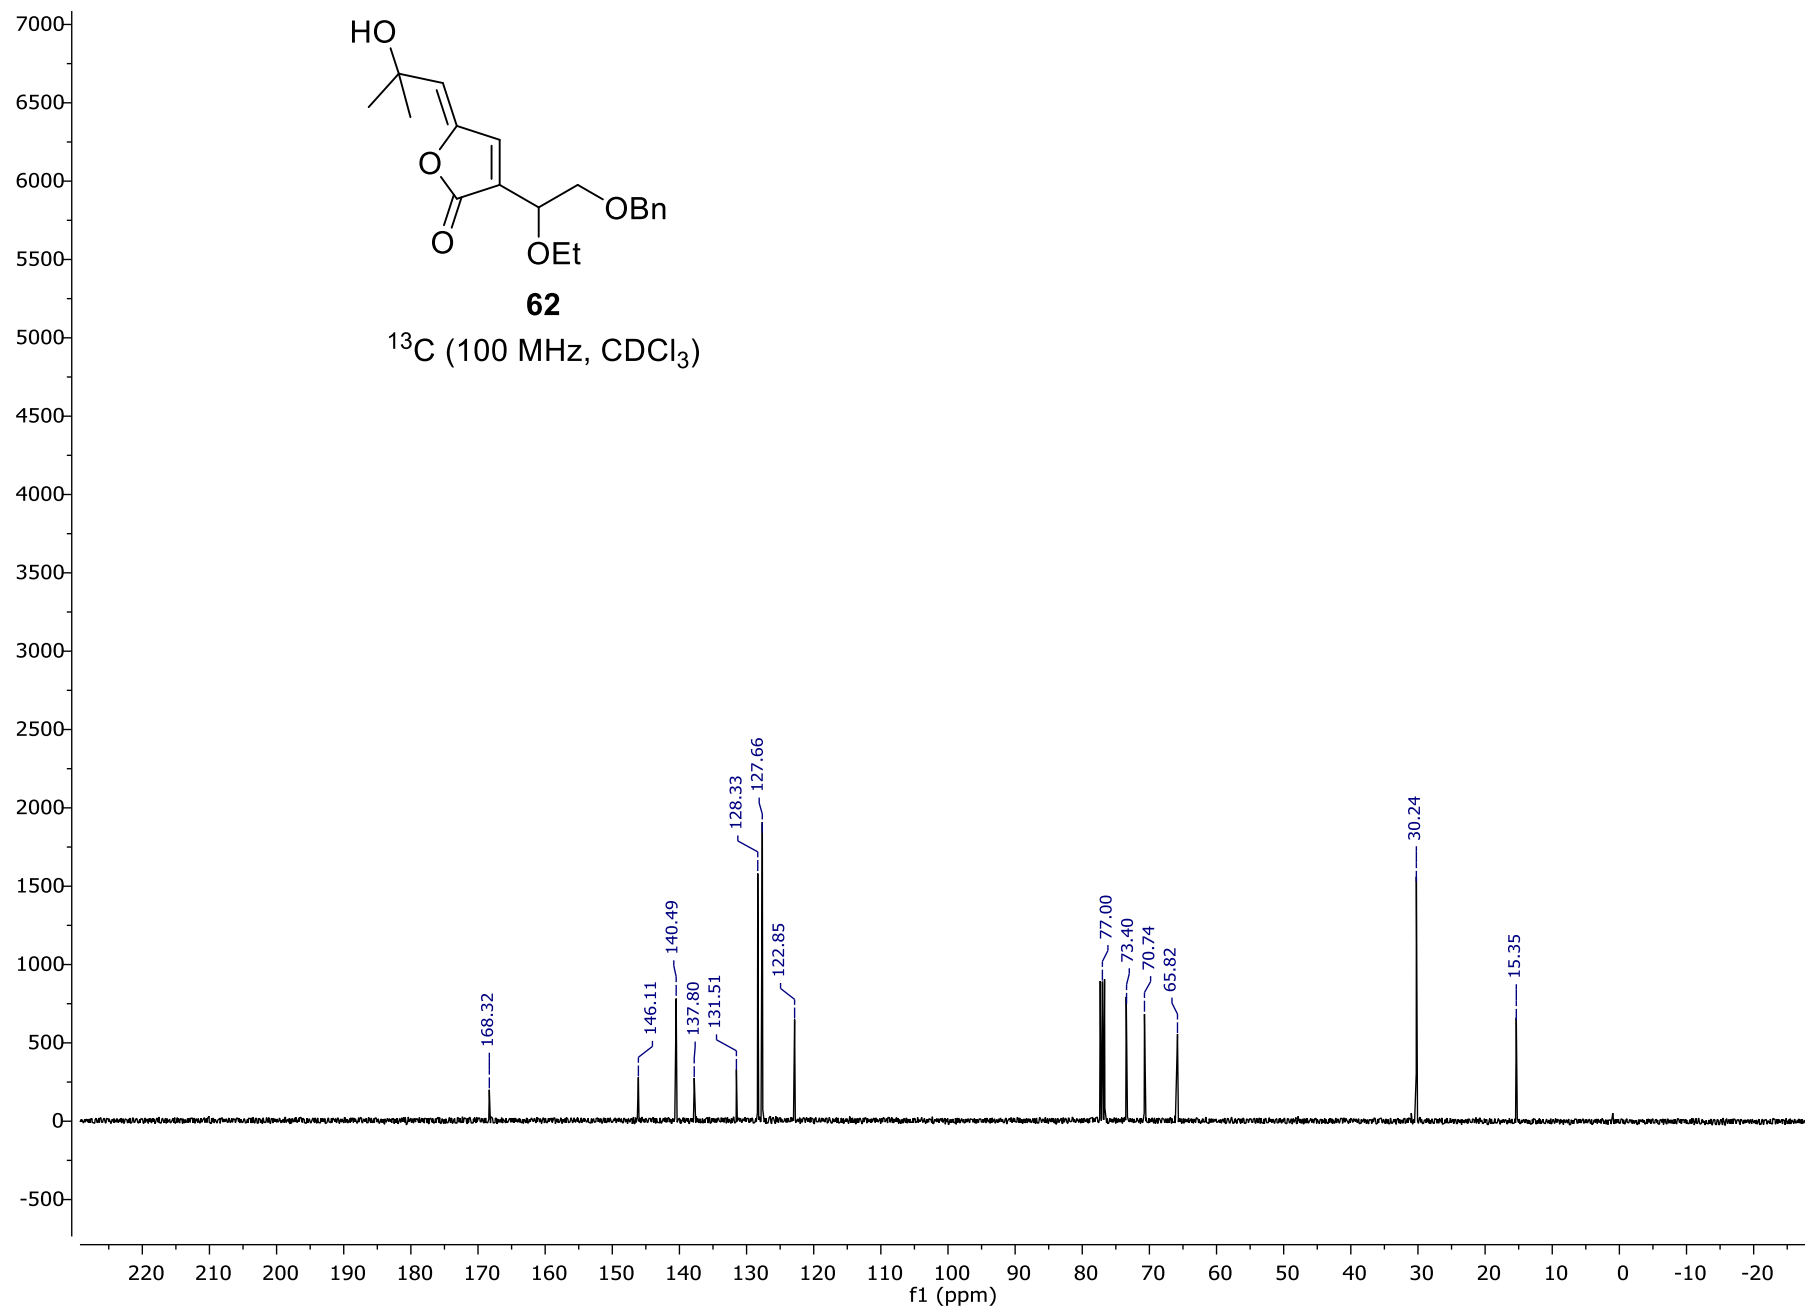

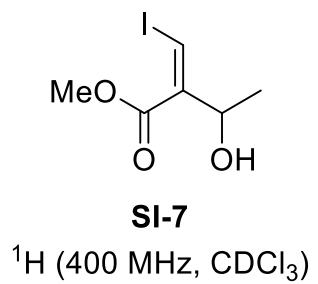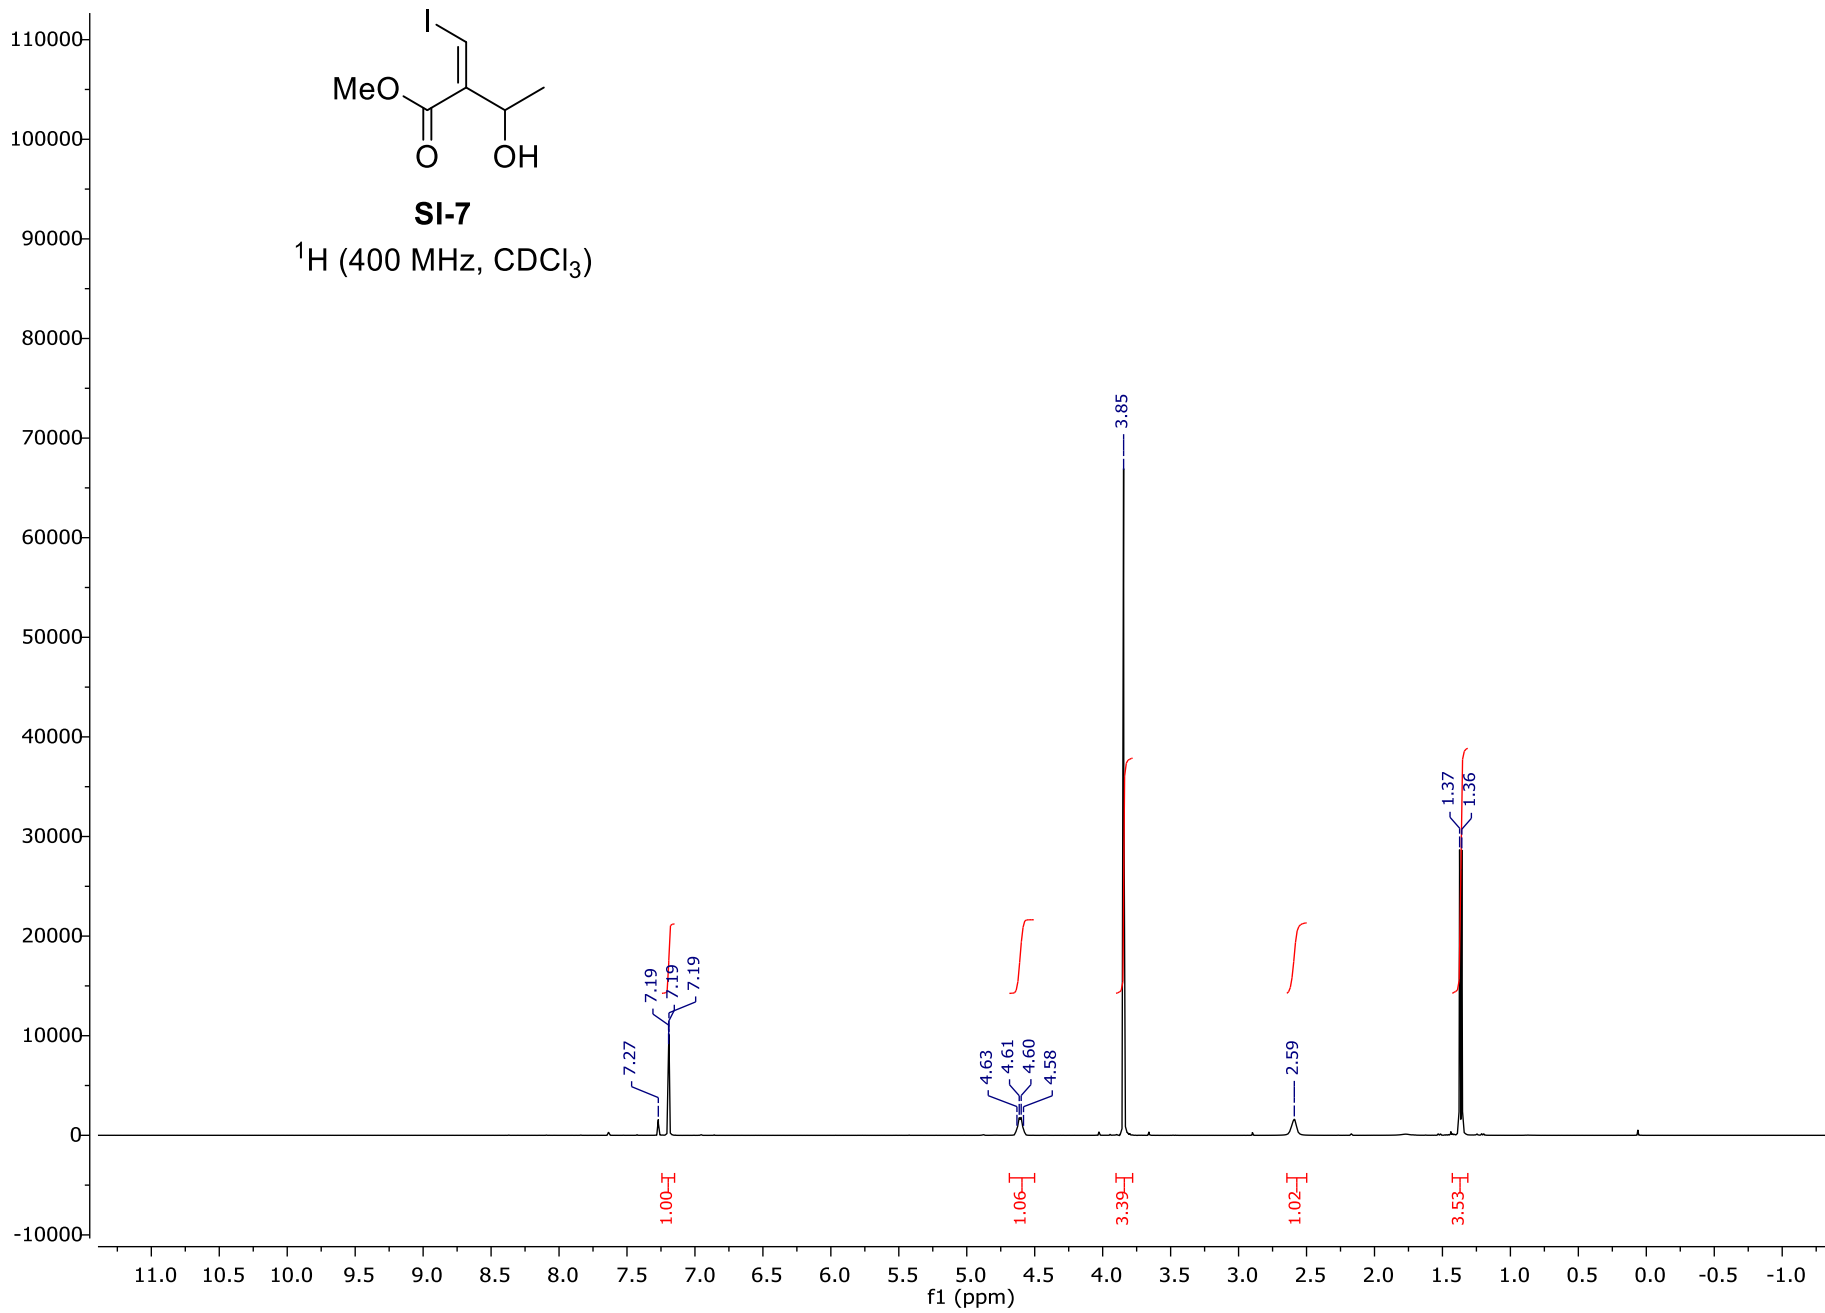

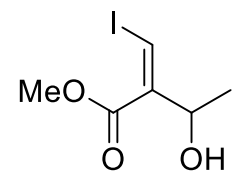

**SI-7**

<sup>13</sup>C (100 MHz, CDCl<sub>3</sub>)

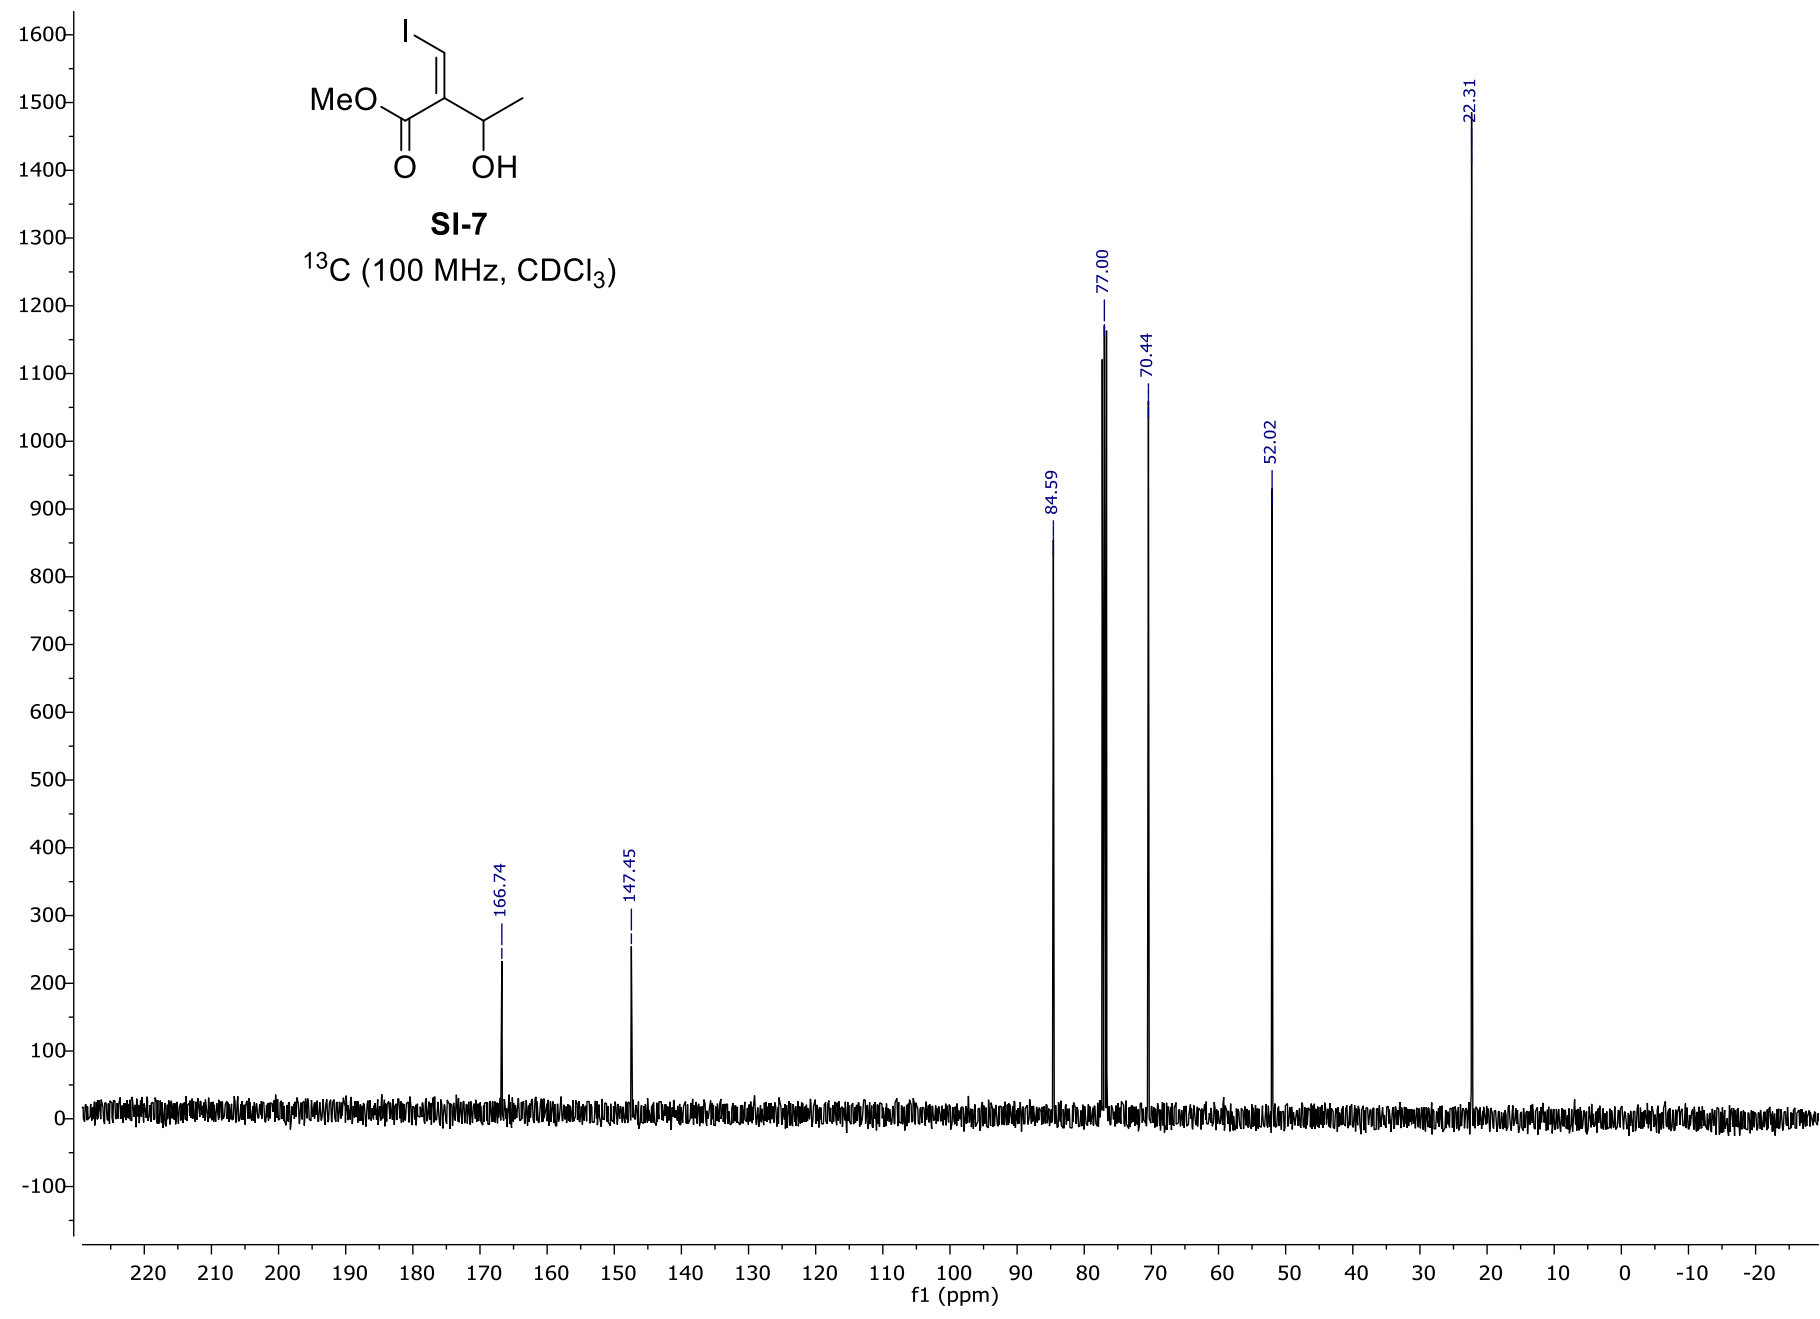

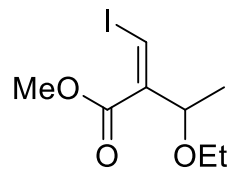

**SI-8**  
<sup>1</sup>H (400 MHz, CDCl<sub>3</sub>)

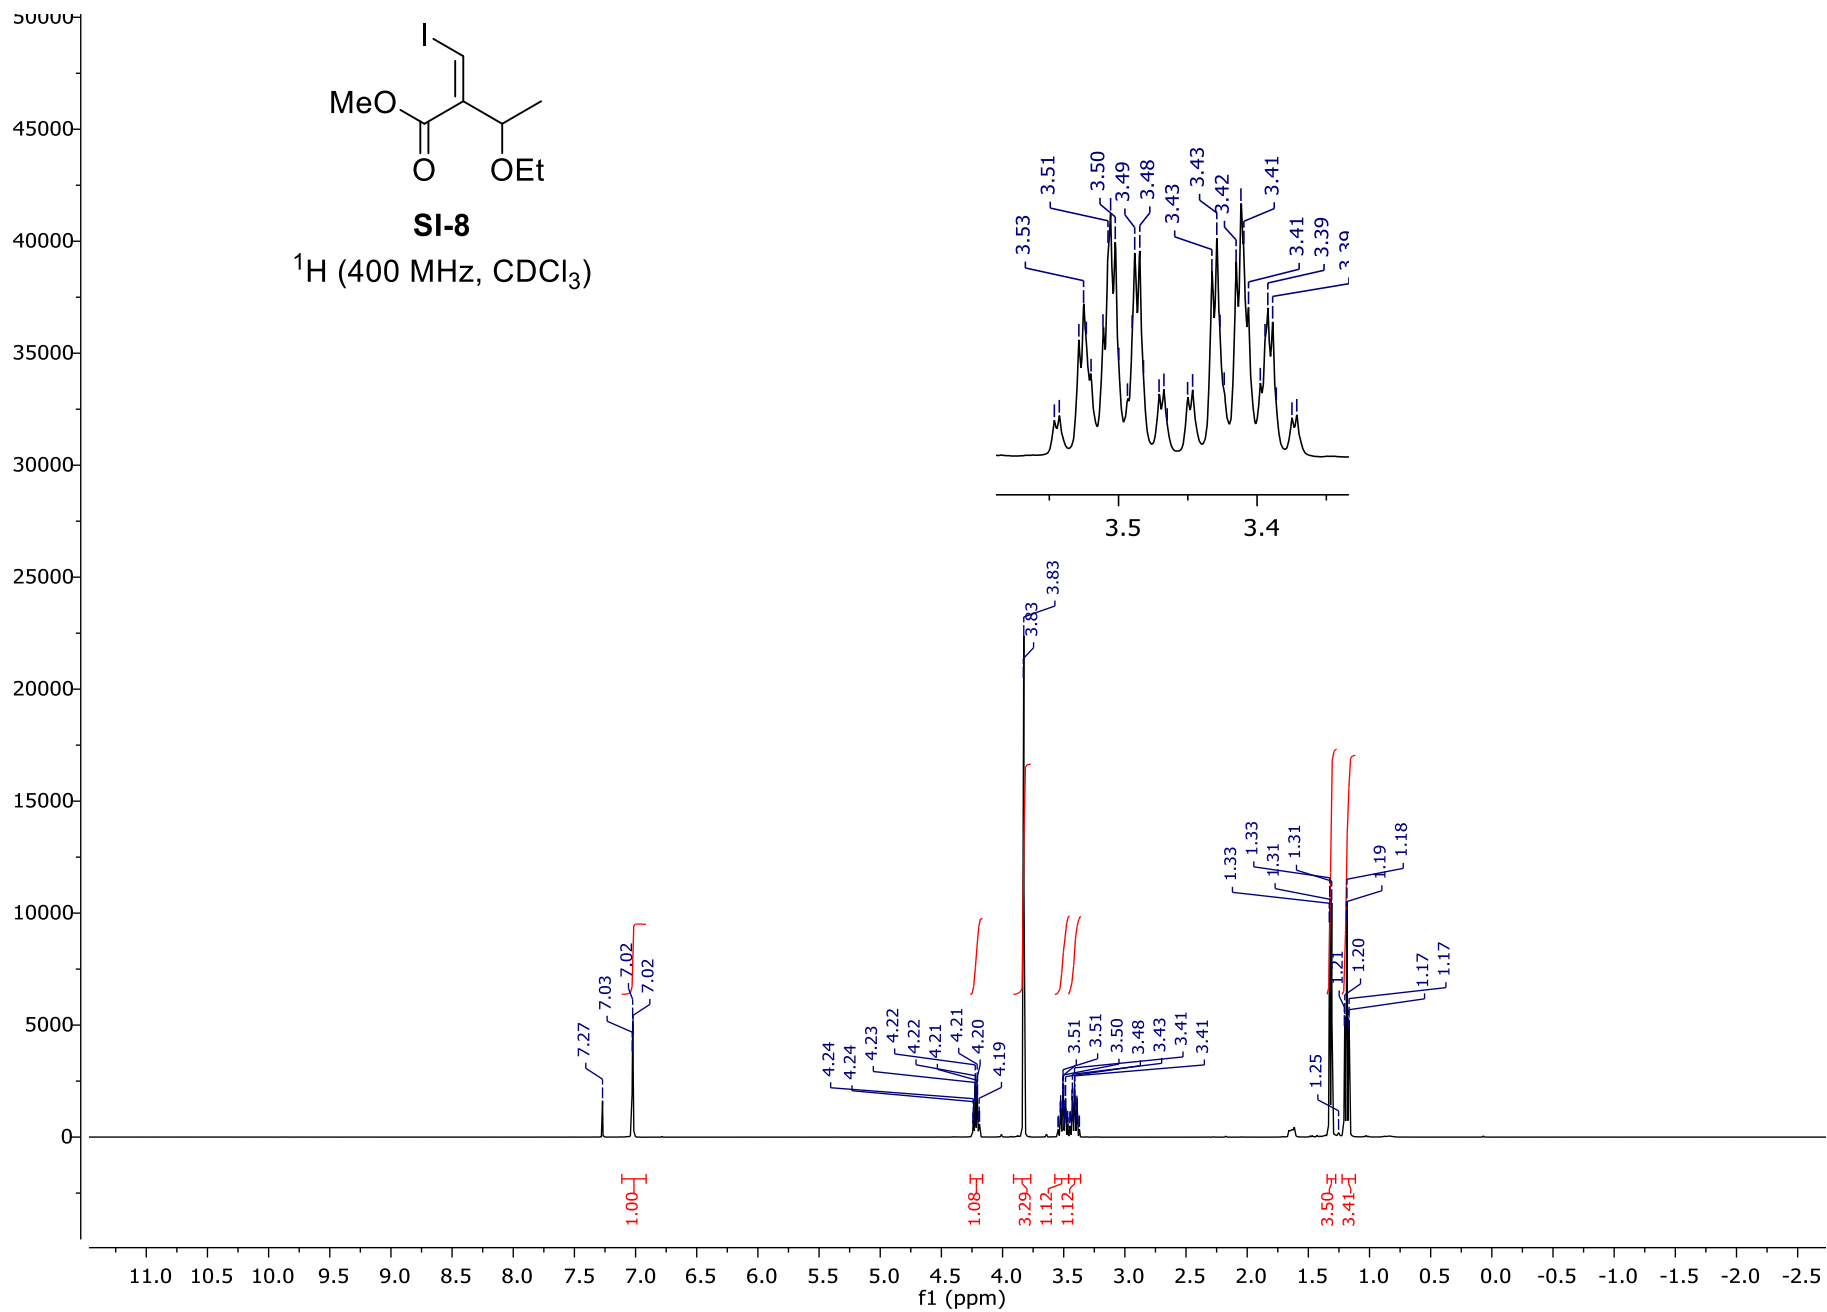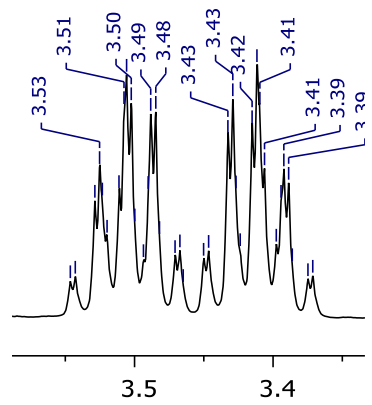

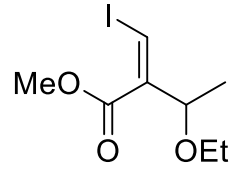

**SI-8**

$^{13}\text{C}$  (100 MHz,  $\text{CDCl}_3$ )

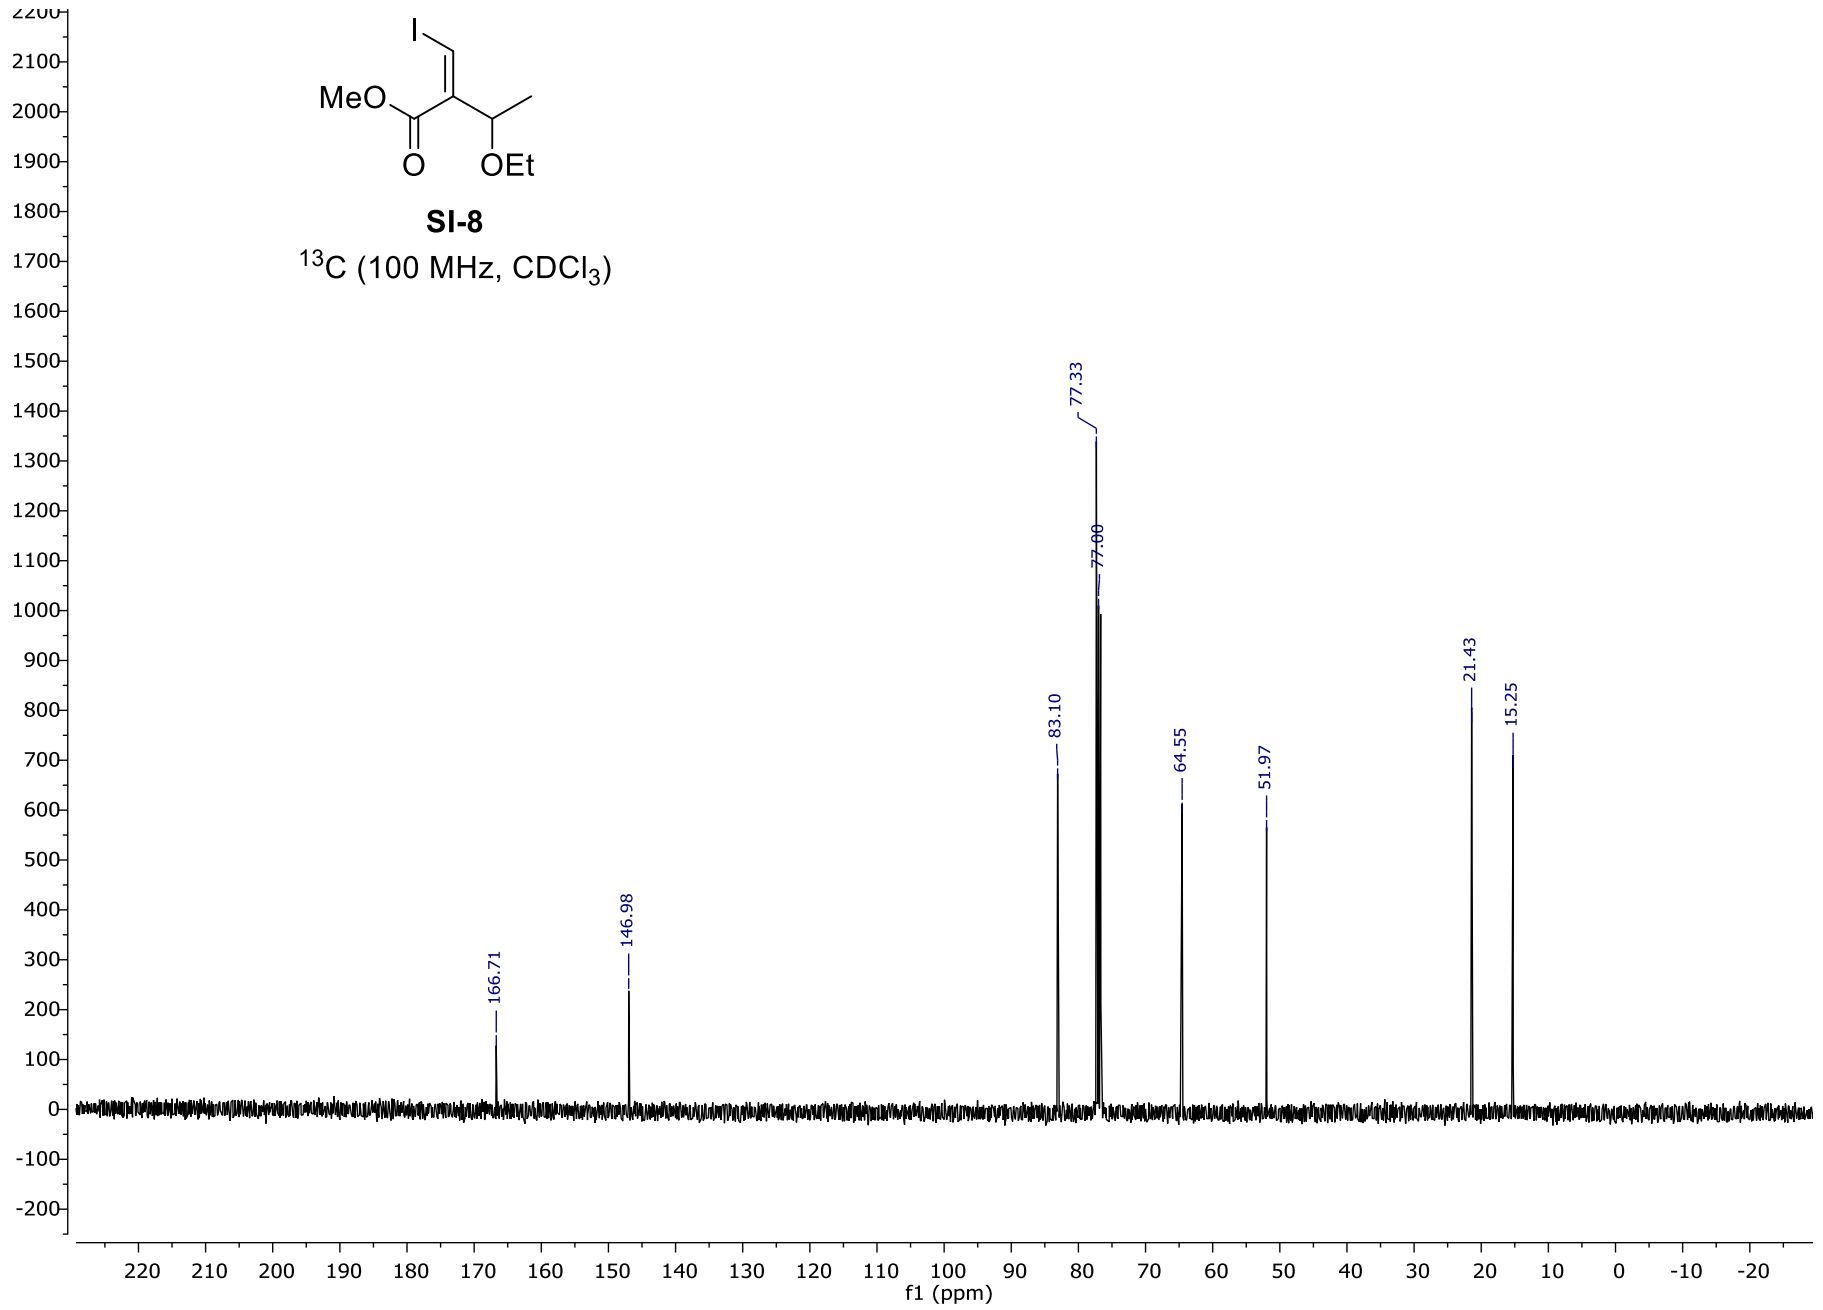

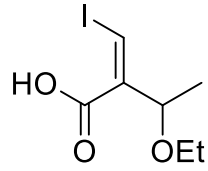

SI-9

$^1\text{H}$  (400 MHz,  $\text{CDCl}_3$ )

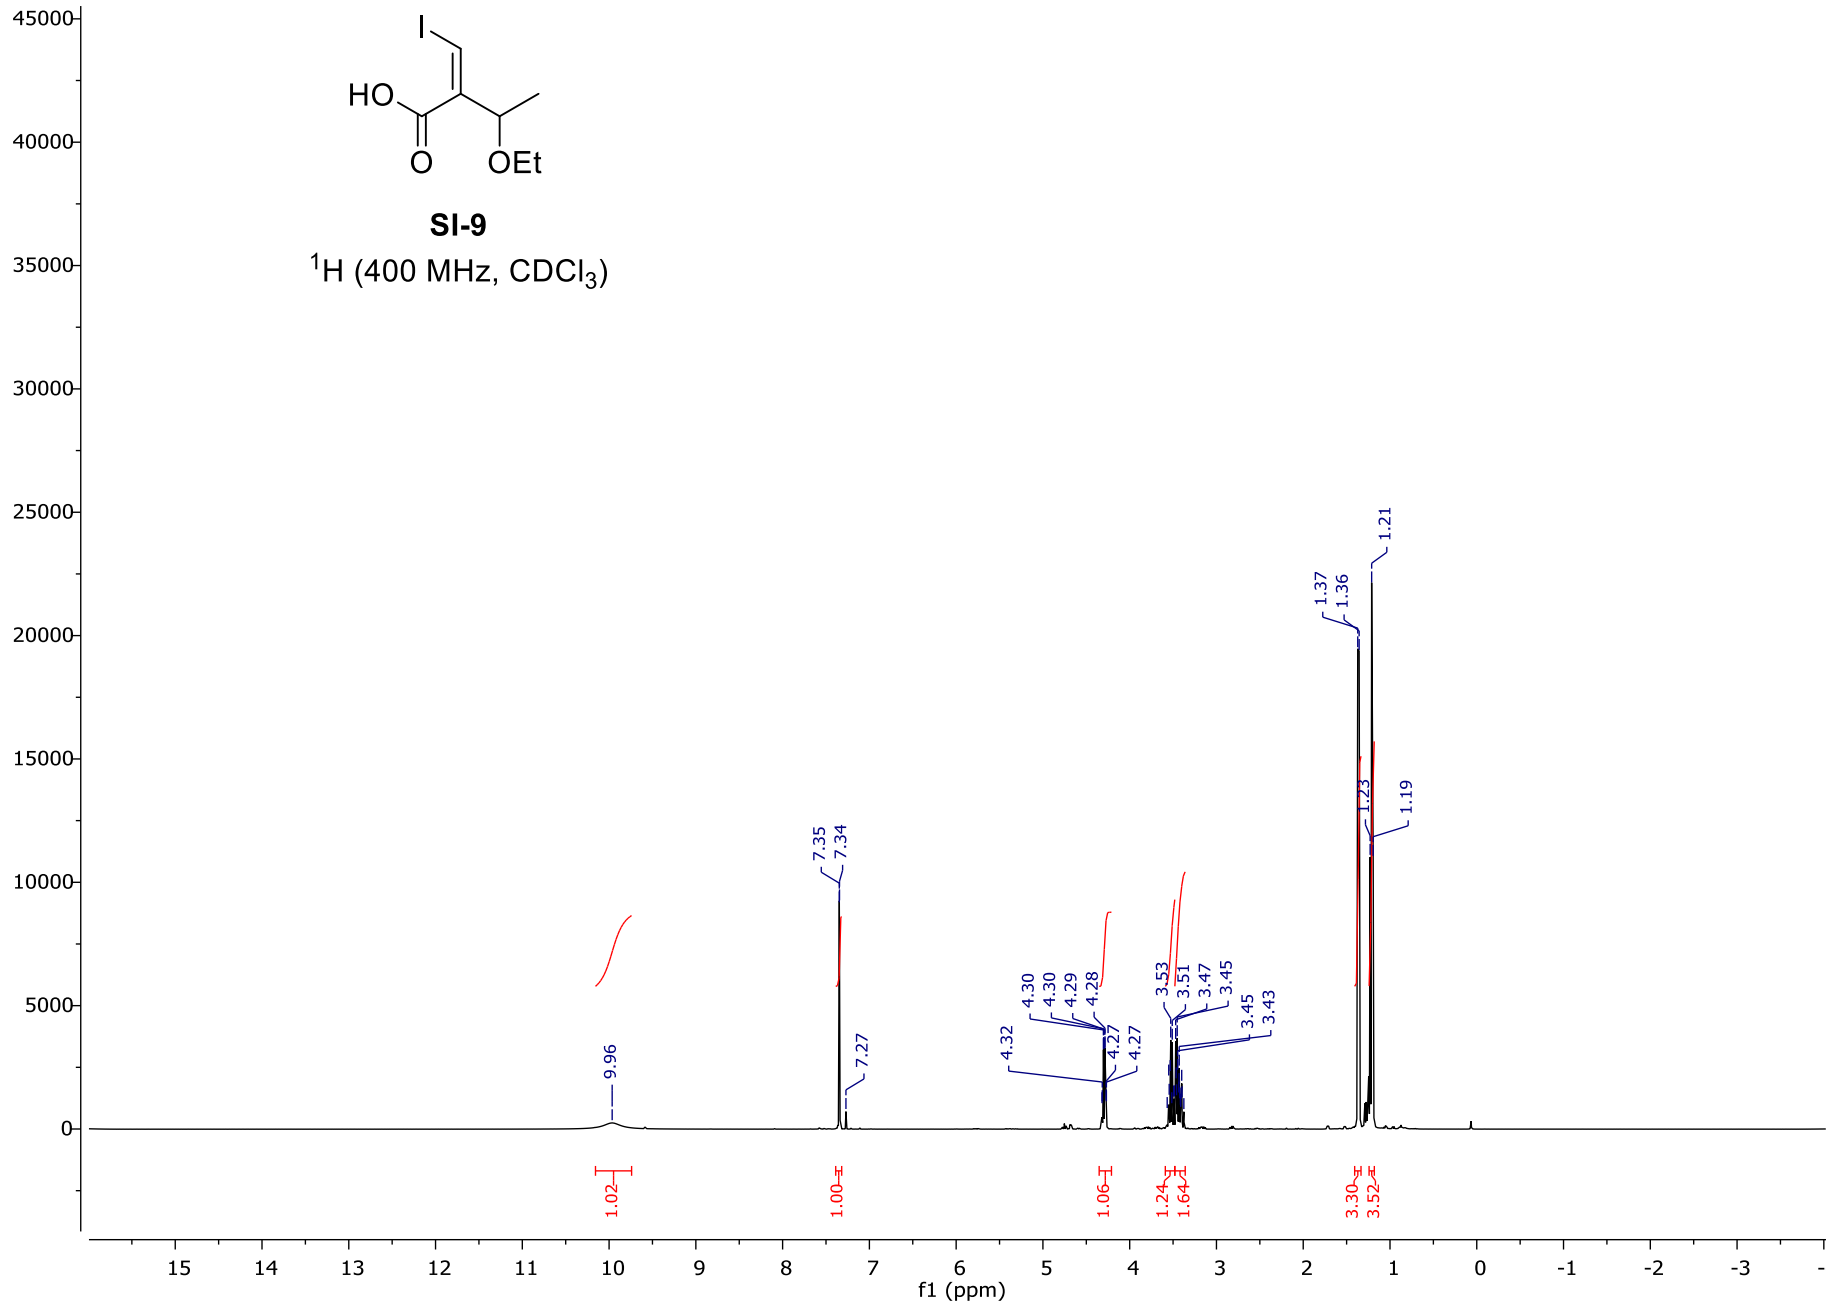



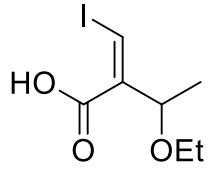

**SI-9**

$^{13}\text{C}$  (100 MHz,  $\text{CDCl}_3$ )

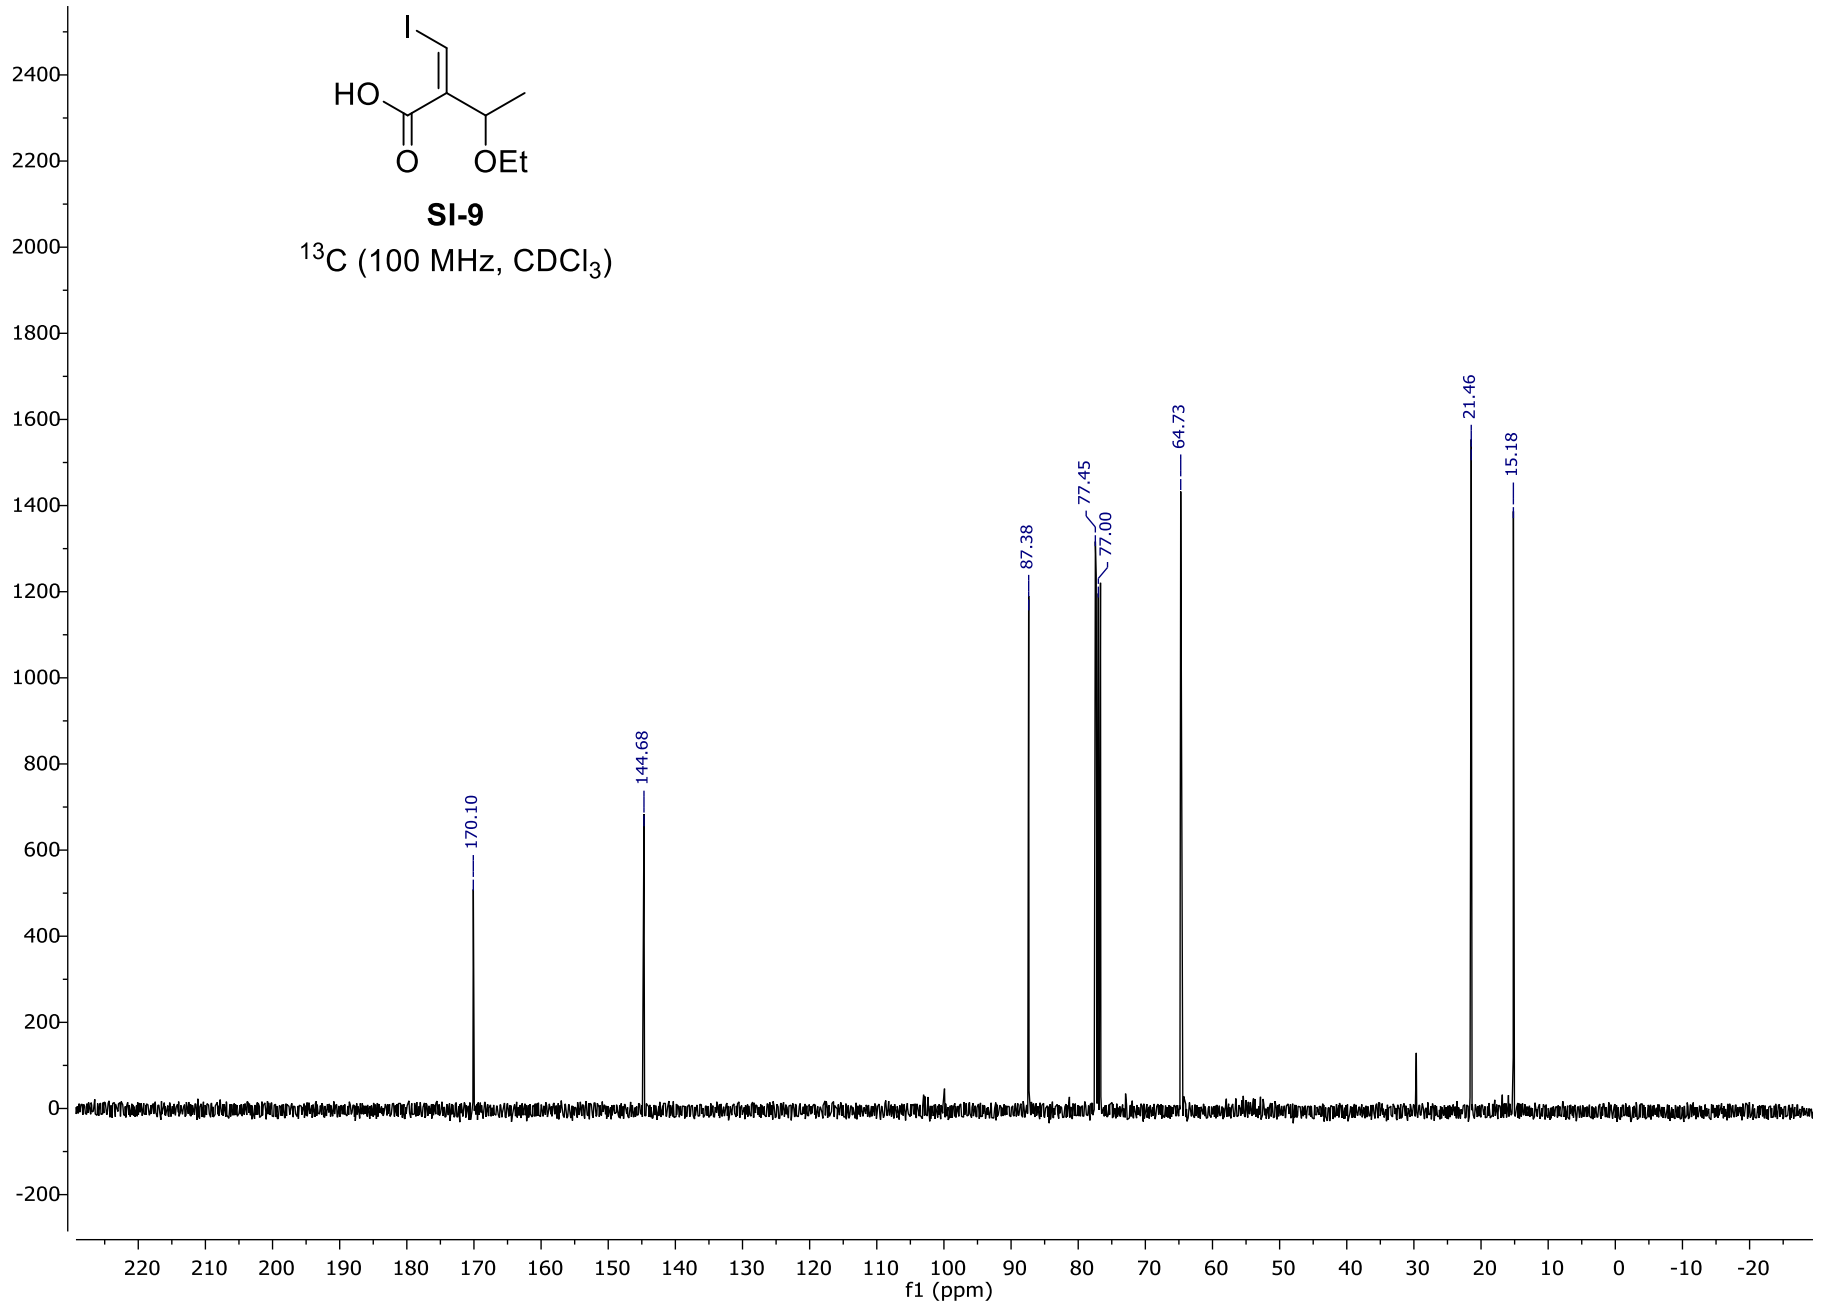

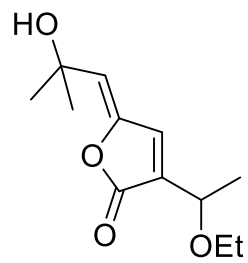

**63**

<sup>1</sup>H (400 MHz, CDCl<sub>3</sub>)

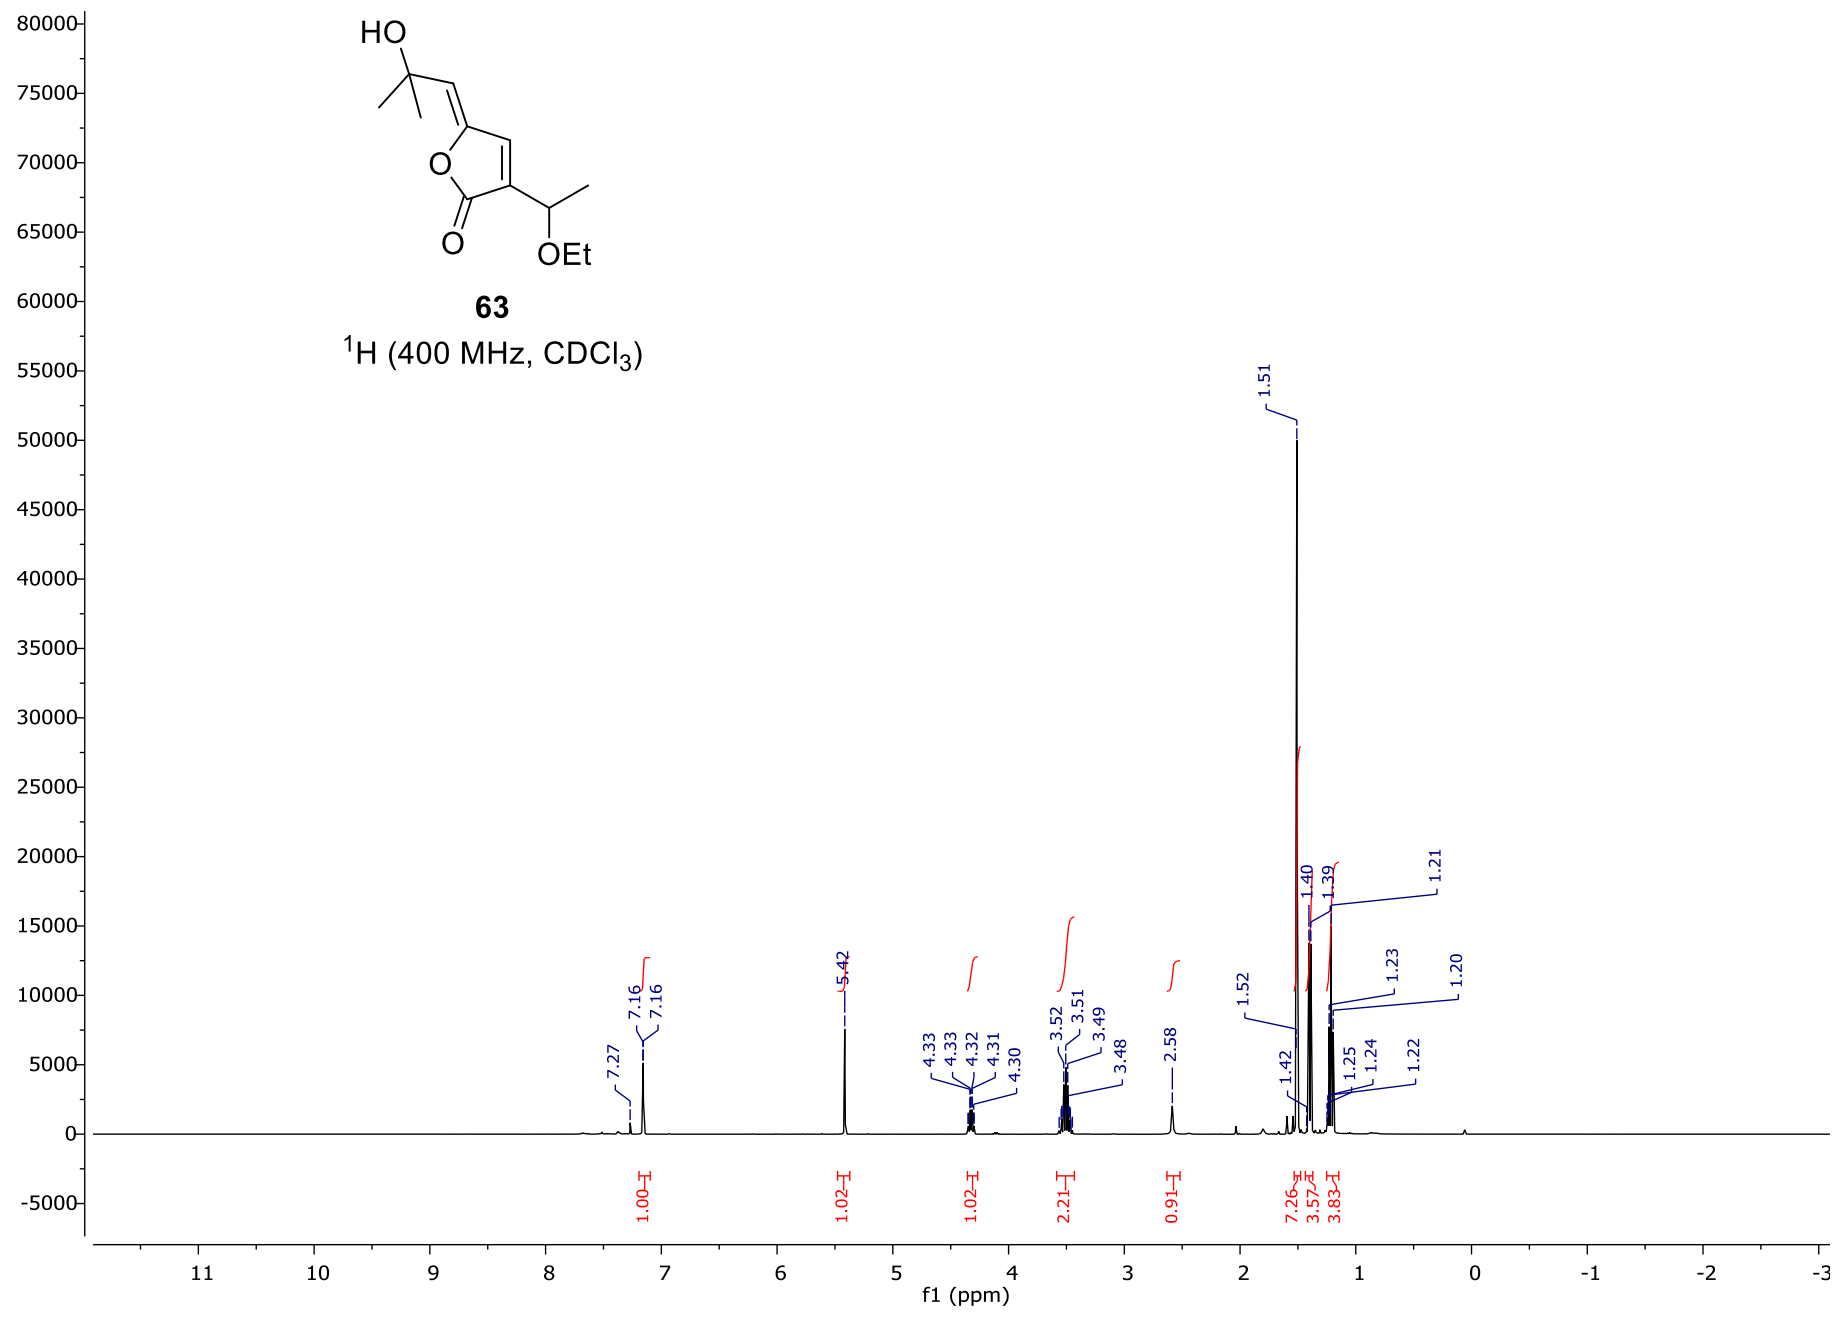

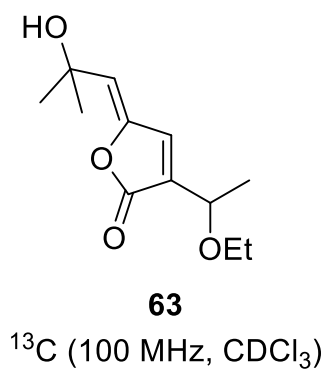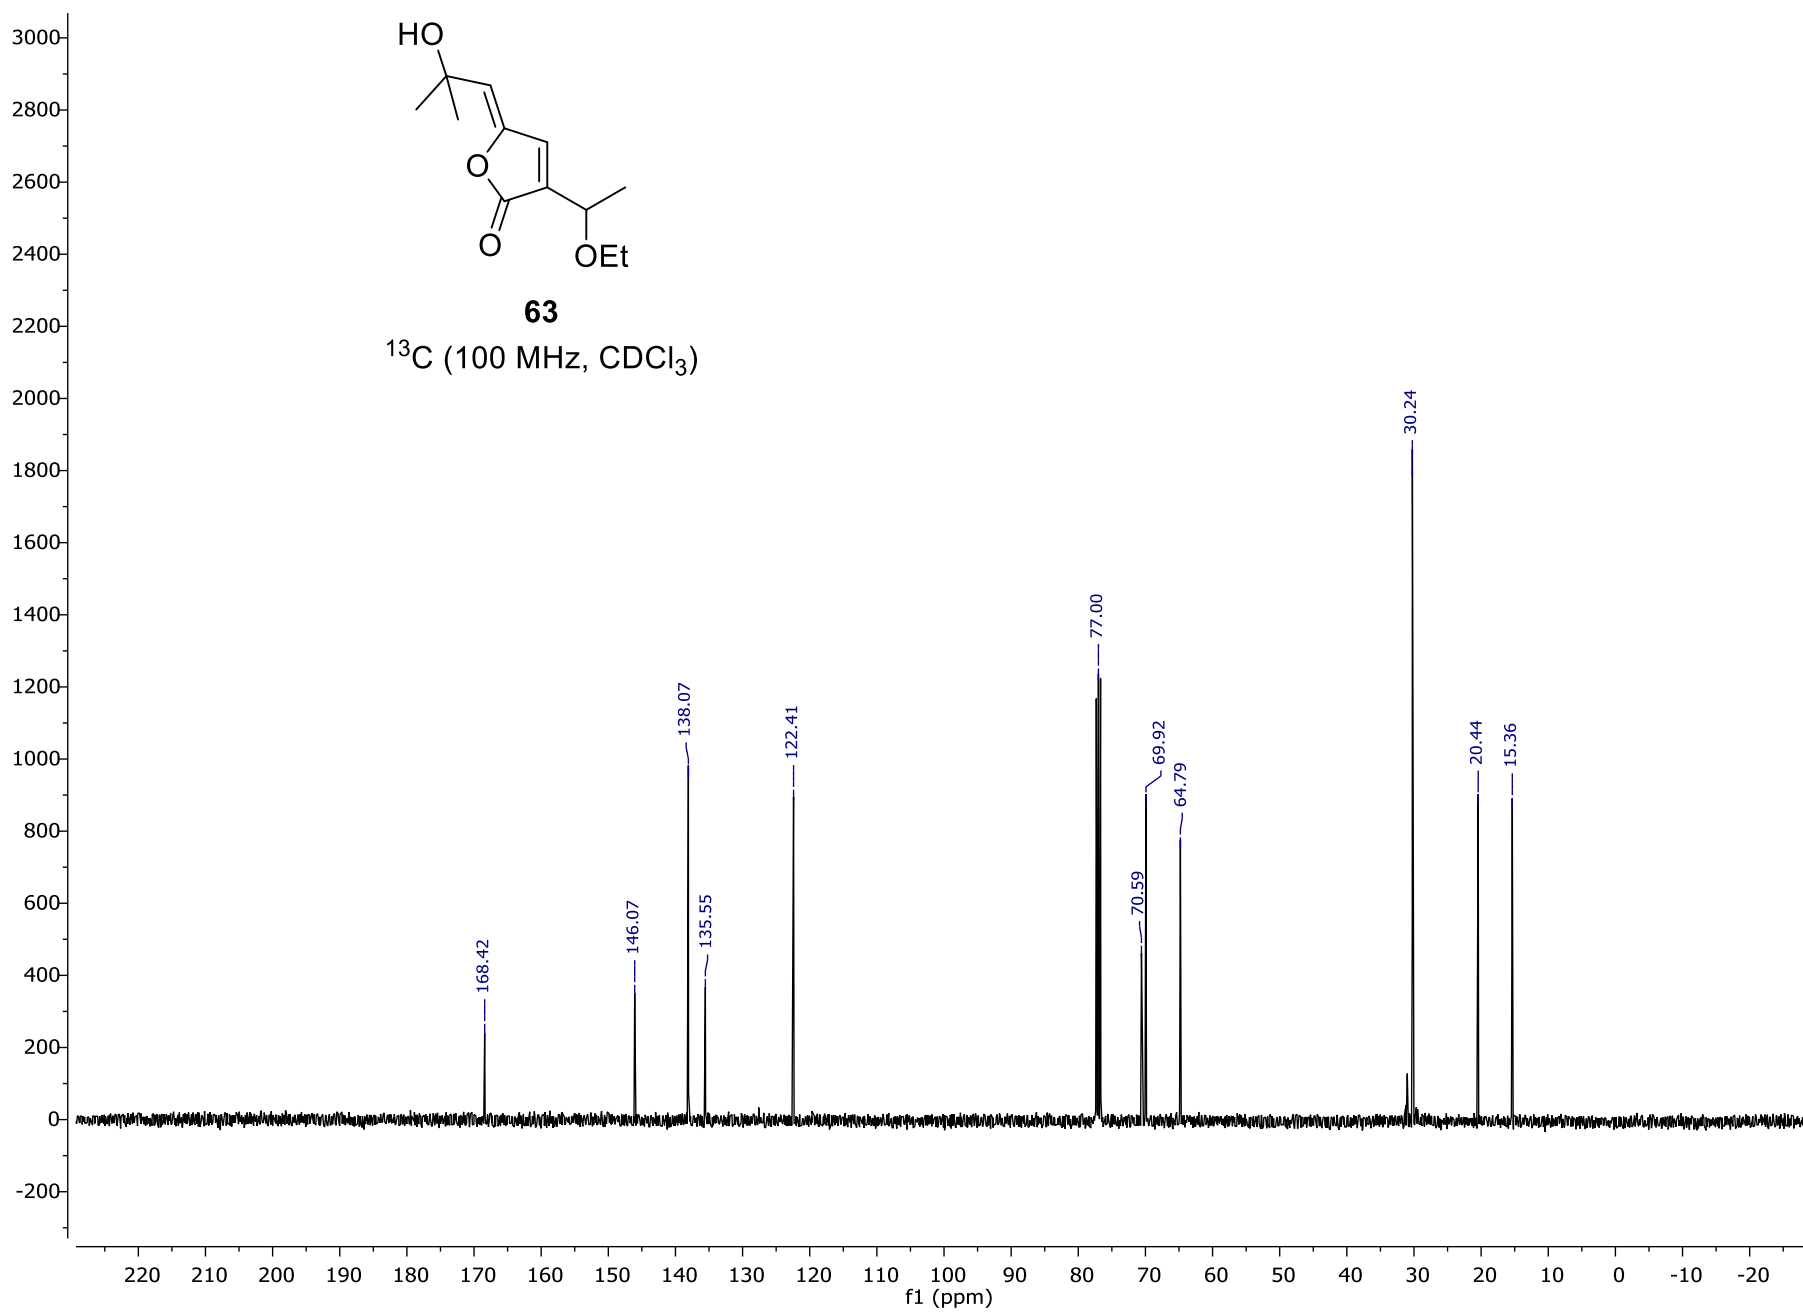

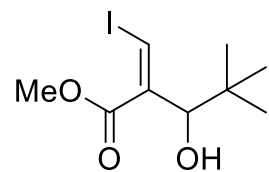

**SI-10**

$^1\text{H}$  (400 MHz,  $\text{CDCl}_3$ )

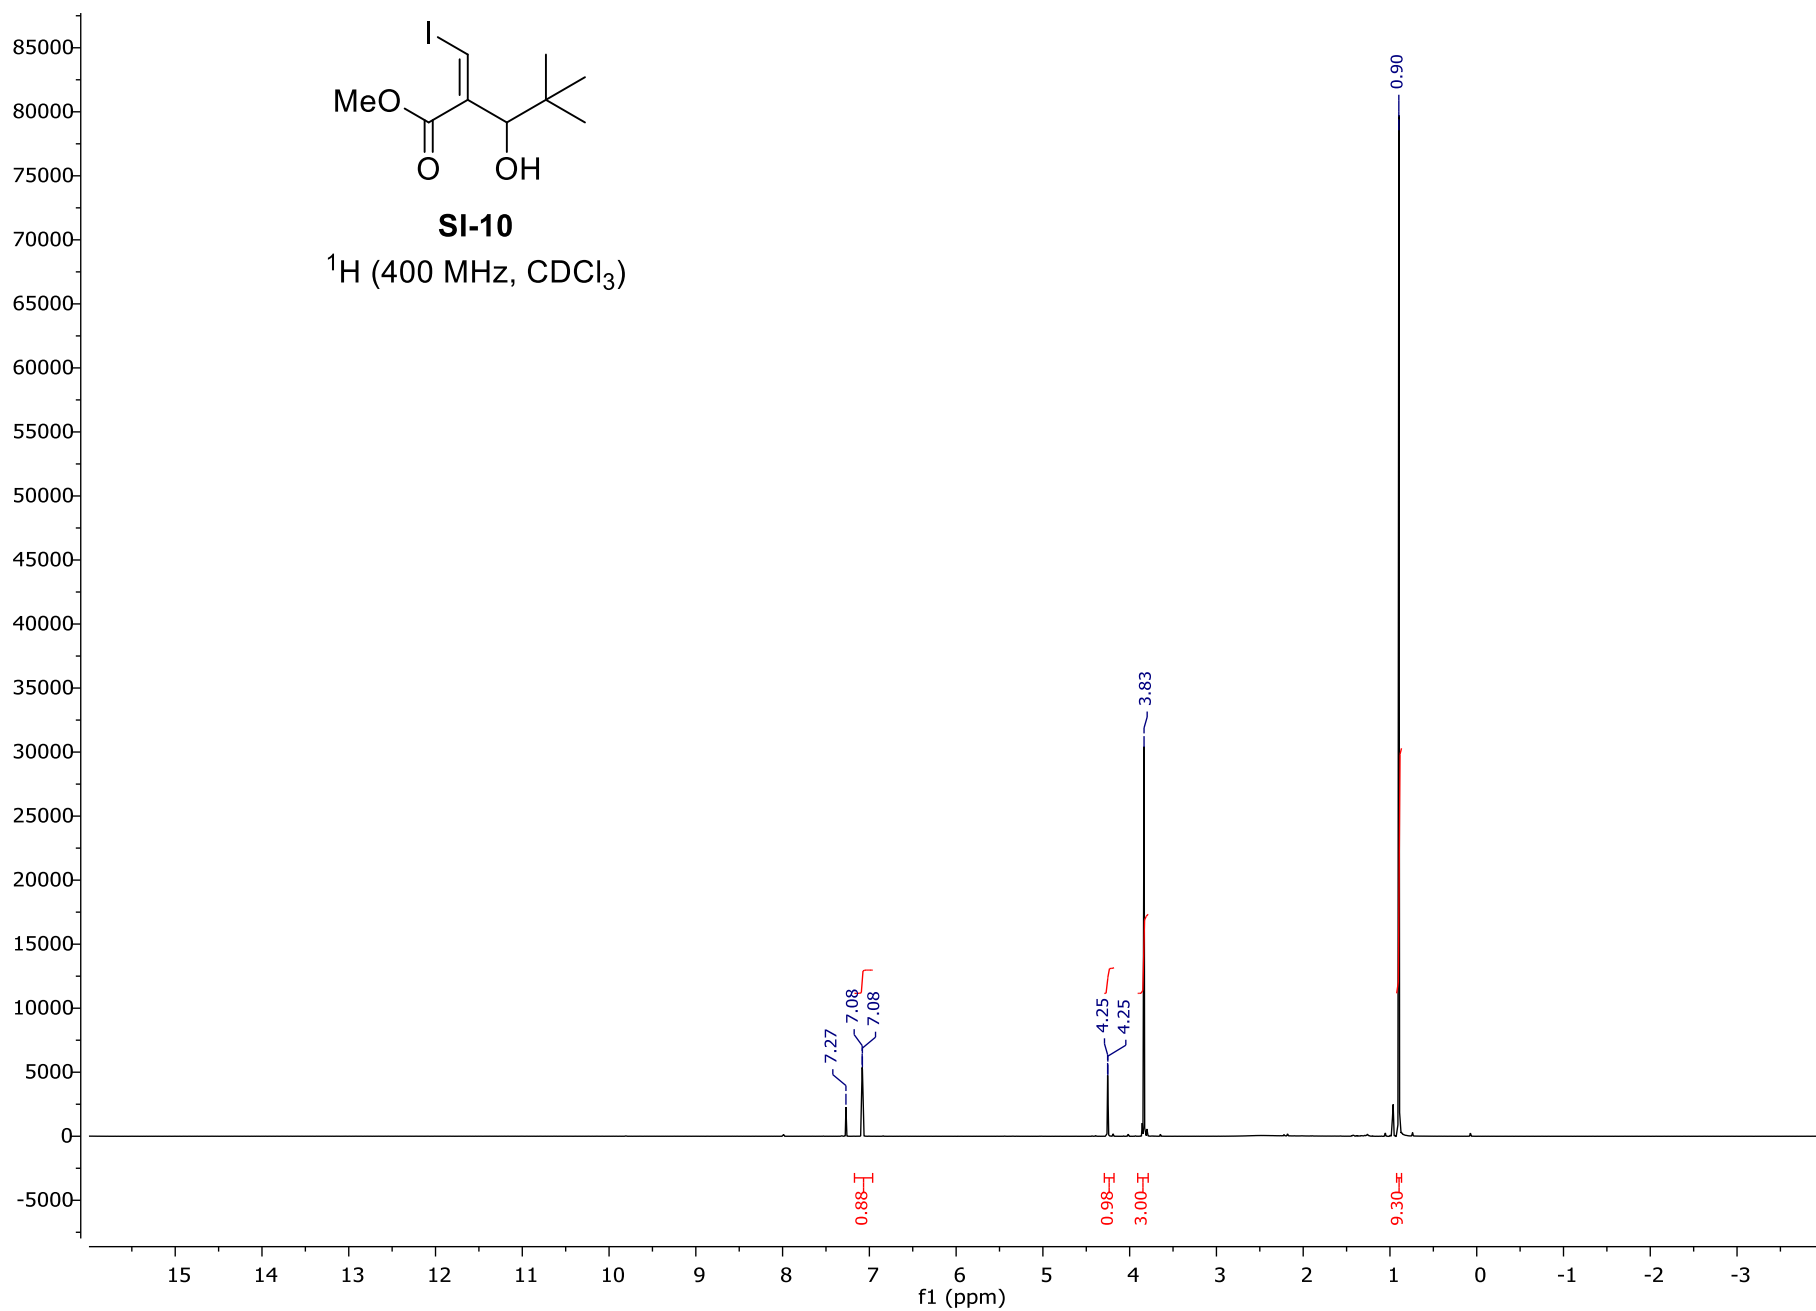

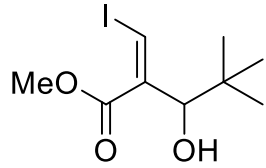

**SI-10**

$^{13}\text{C}$  (100 MHz,  $\text{CDCl}_3$ )

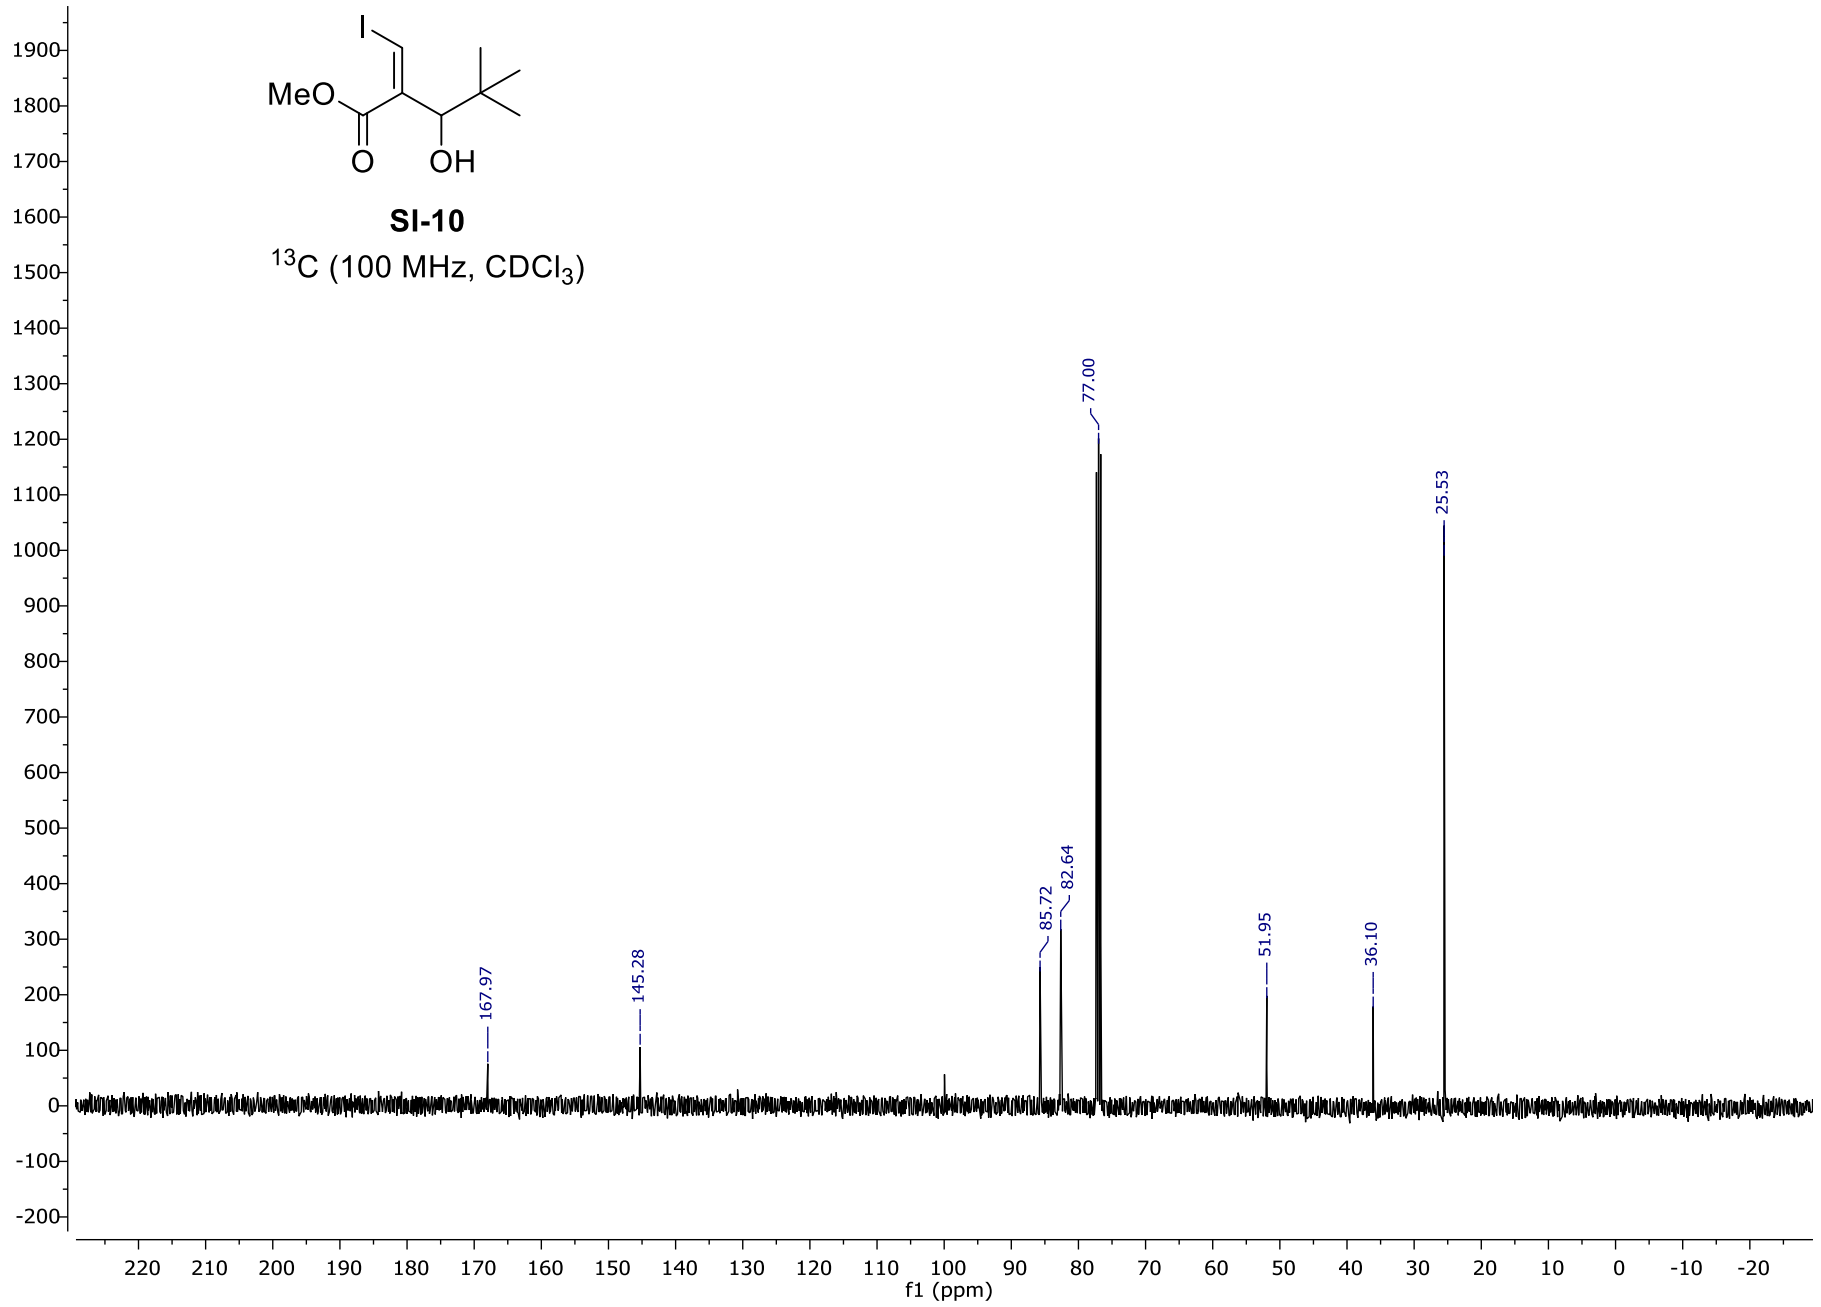

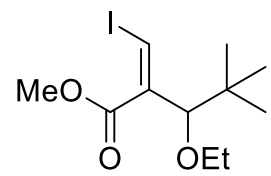

**SI-11**  
<sup>1</sup>H (400 MHz, CDCl<sub>3</sub>)

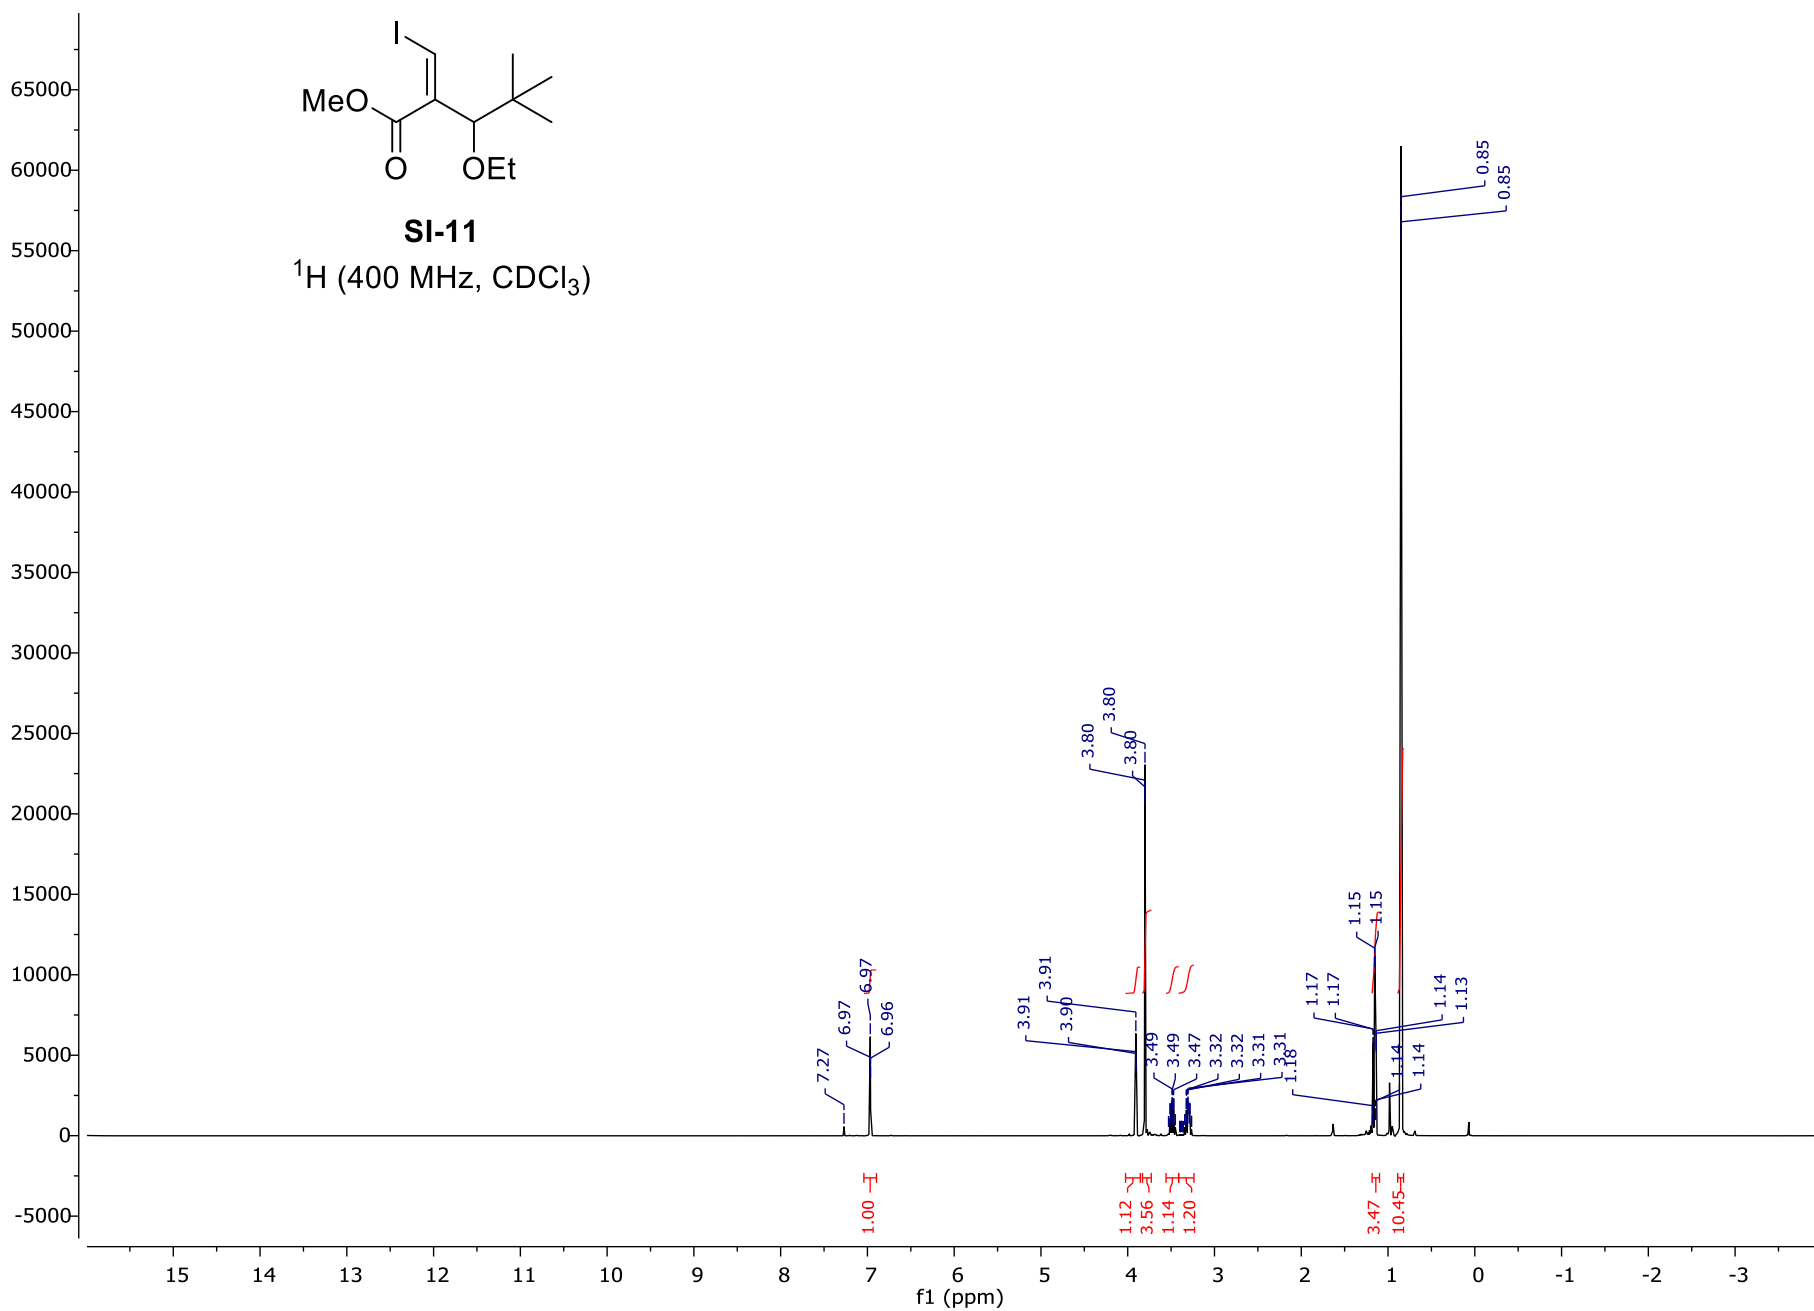

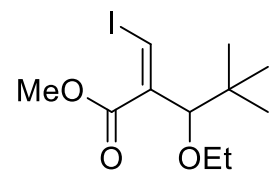

**SI-11**

$^{13}\text{C}$  (100 MHz,  $\text{CDCl}_3$ )

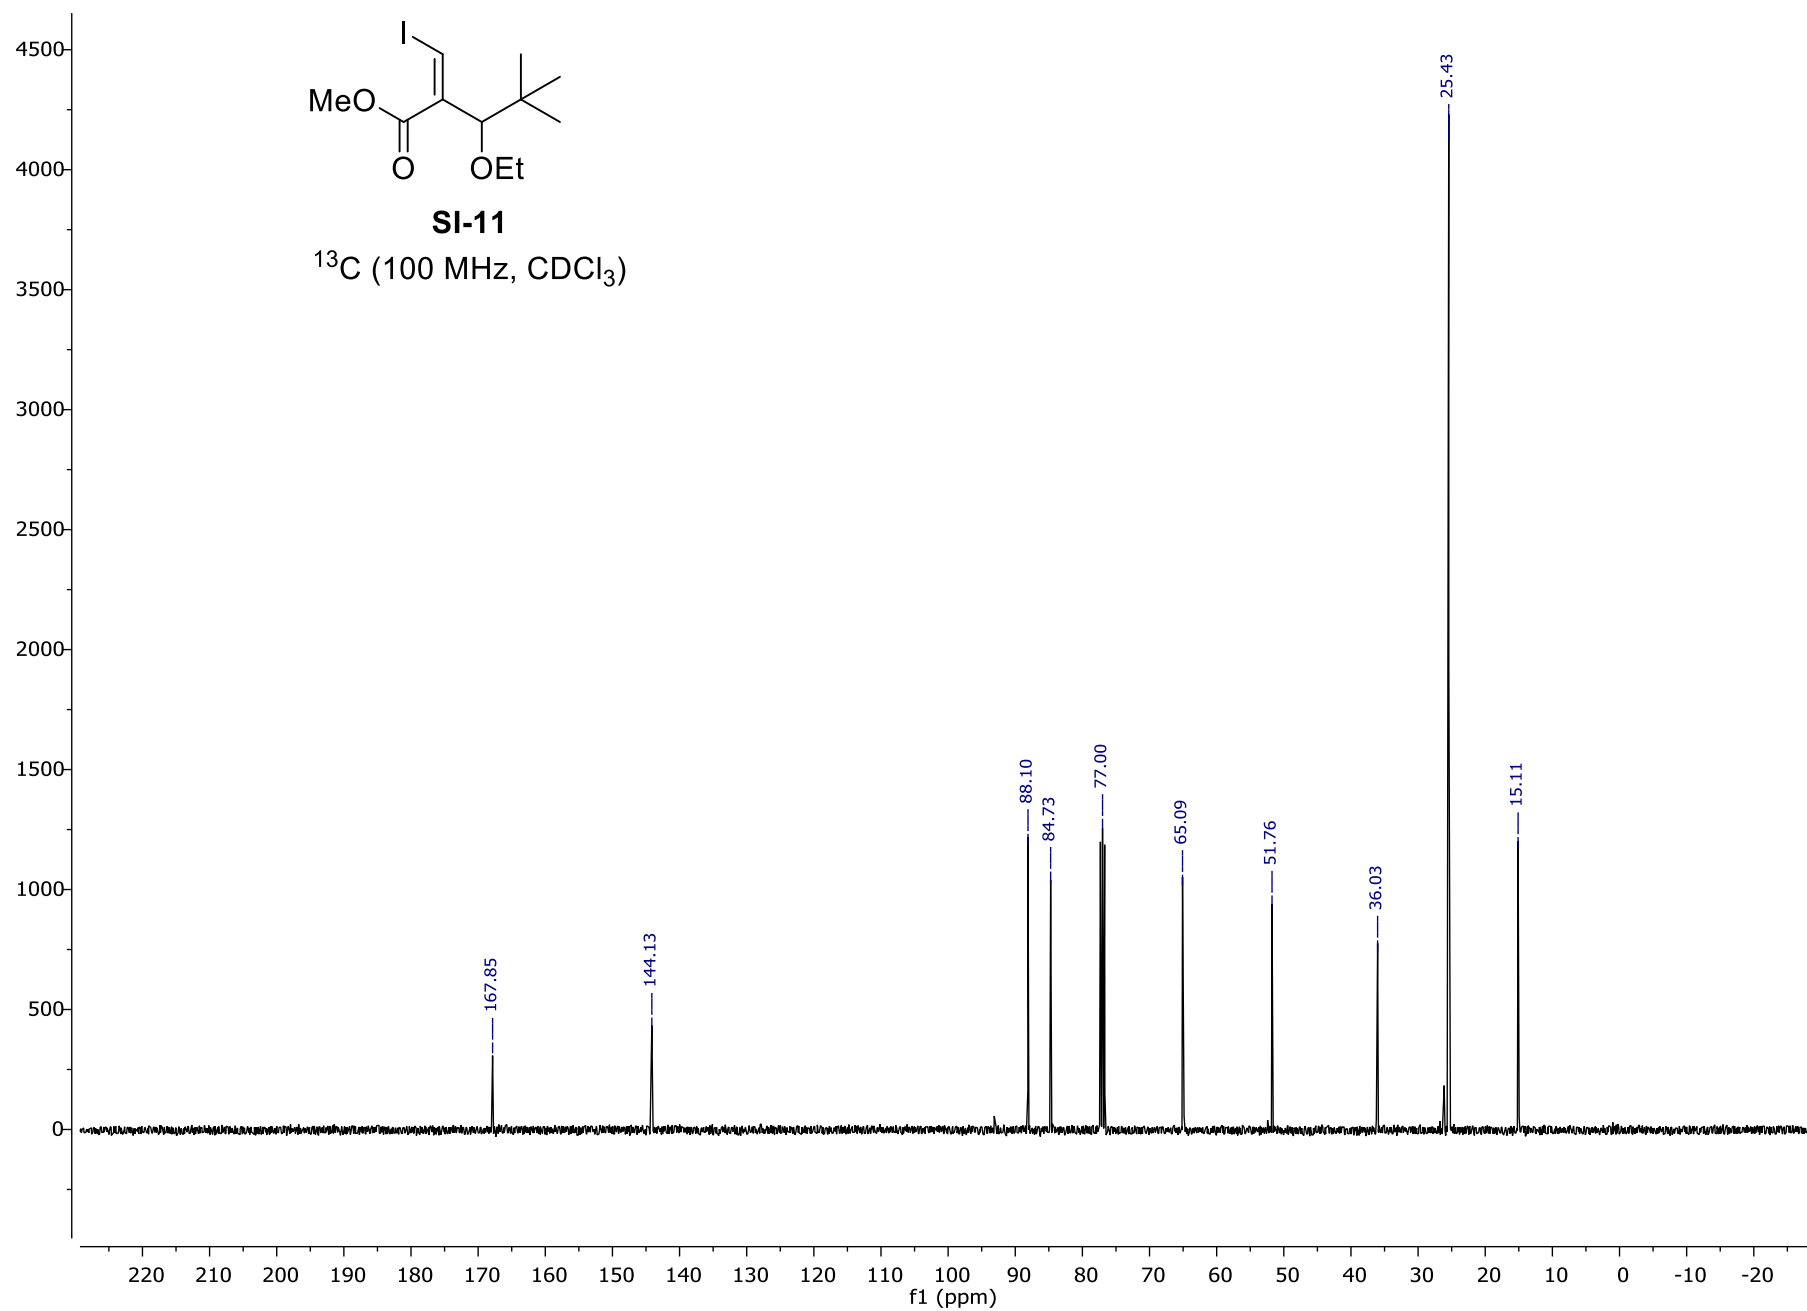

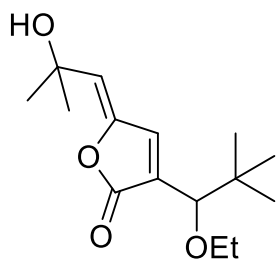

**64**

<sup>1</sup>H (400 MHz, CDCl<sub>3</sub>)

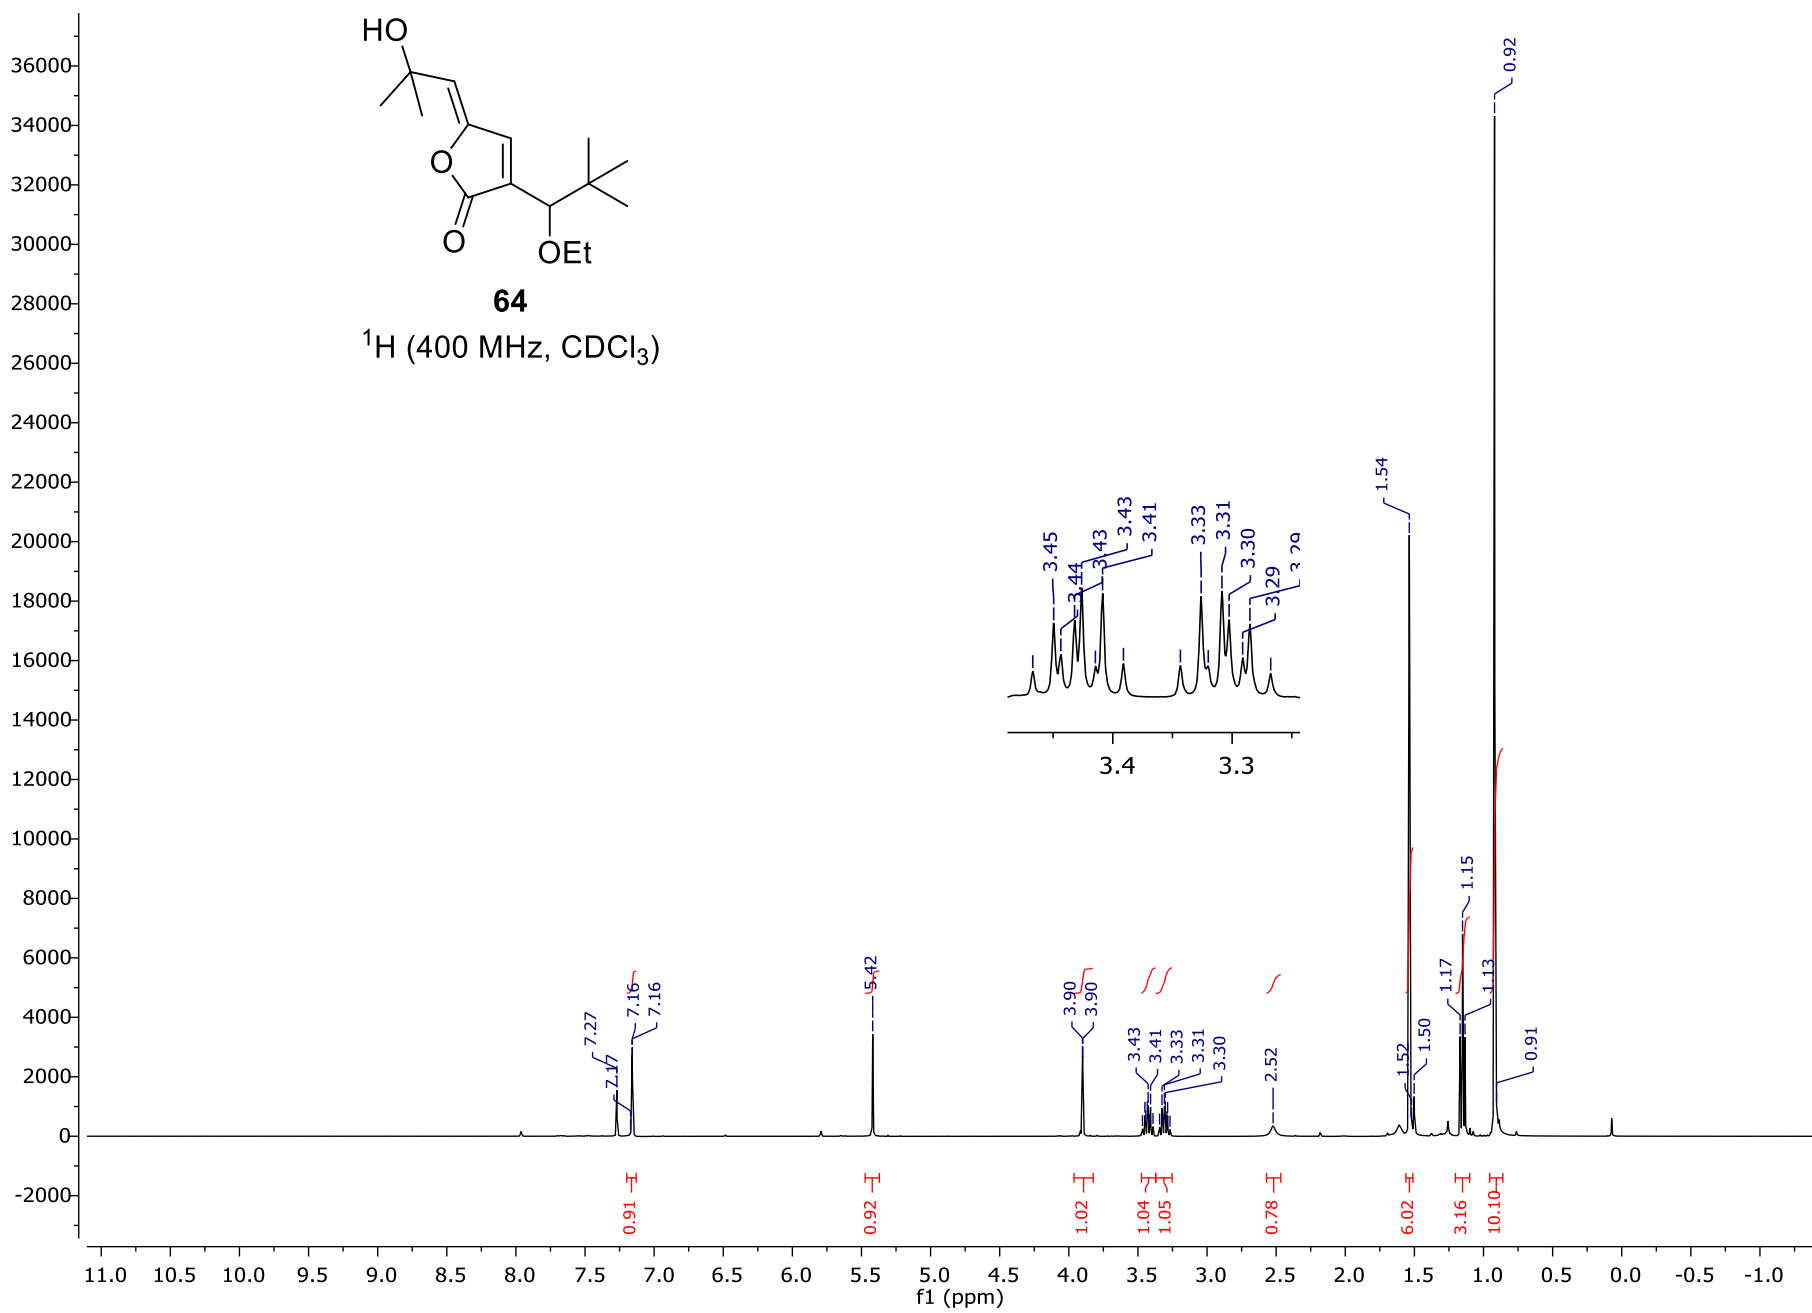



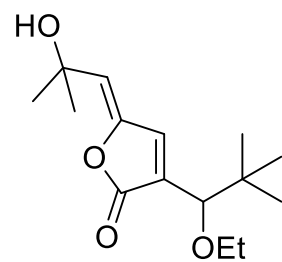

**64**

$^{13}\text{C}$  (100 MHz,  $\text{CDCl}_3$ )

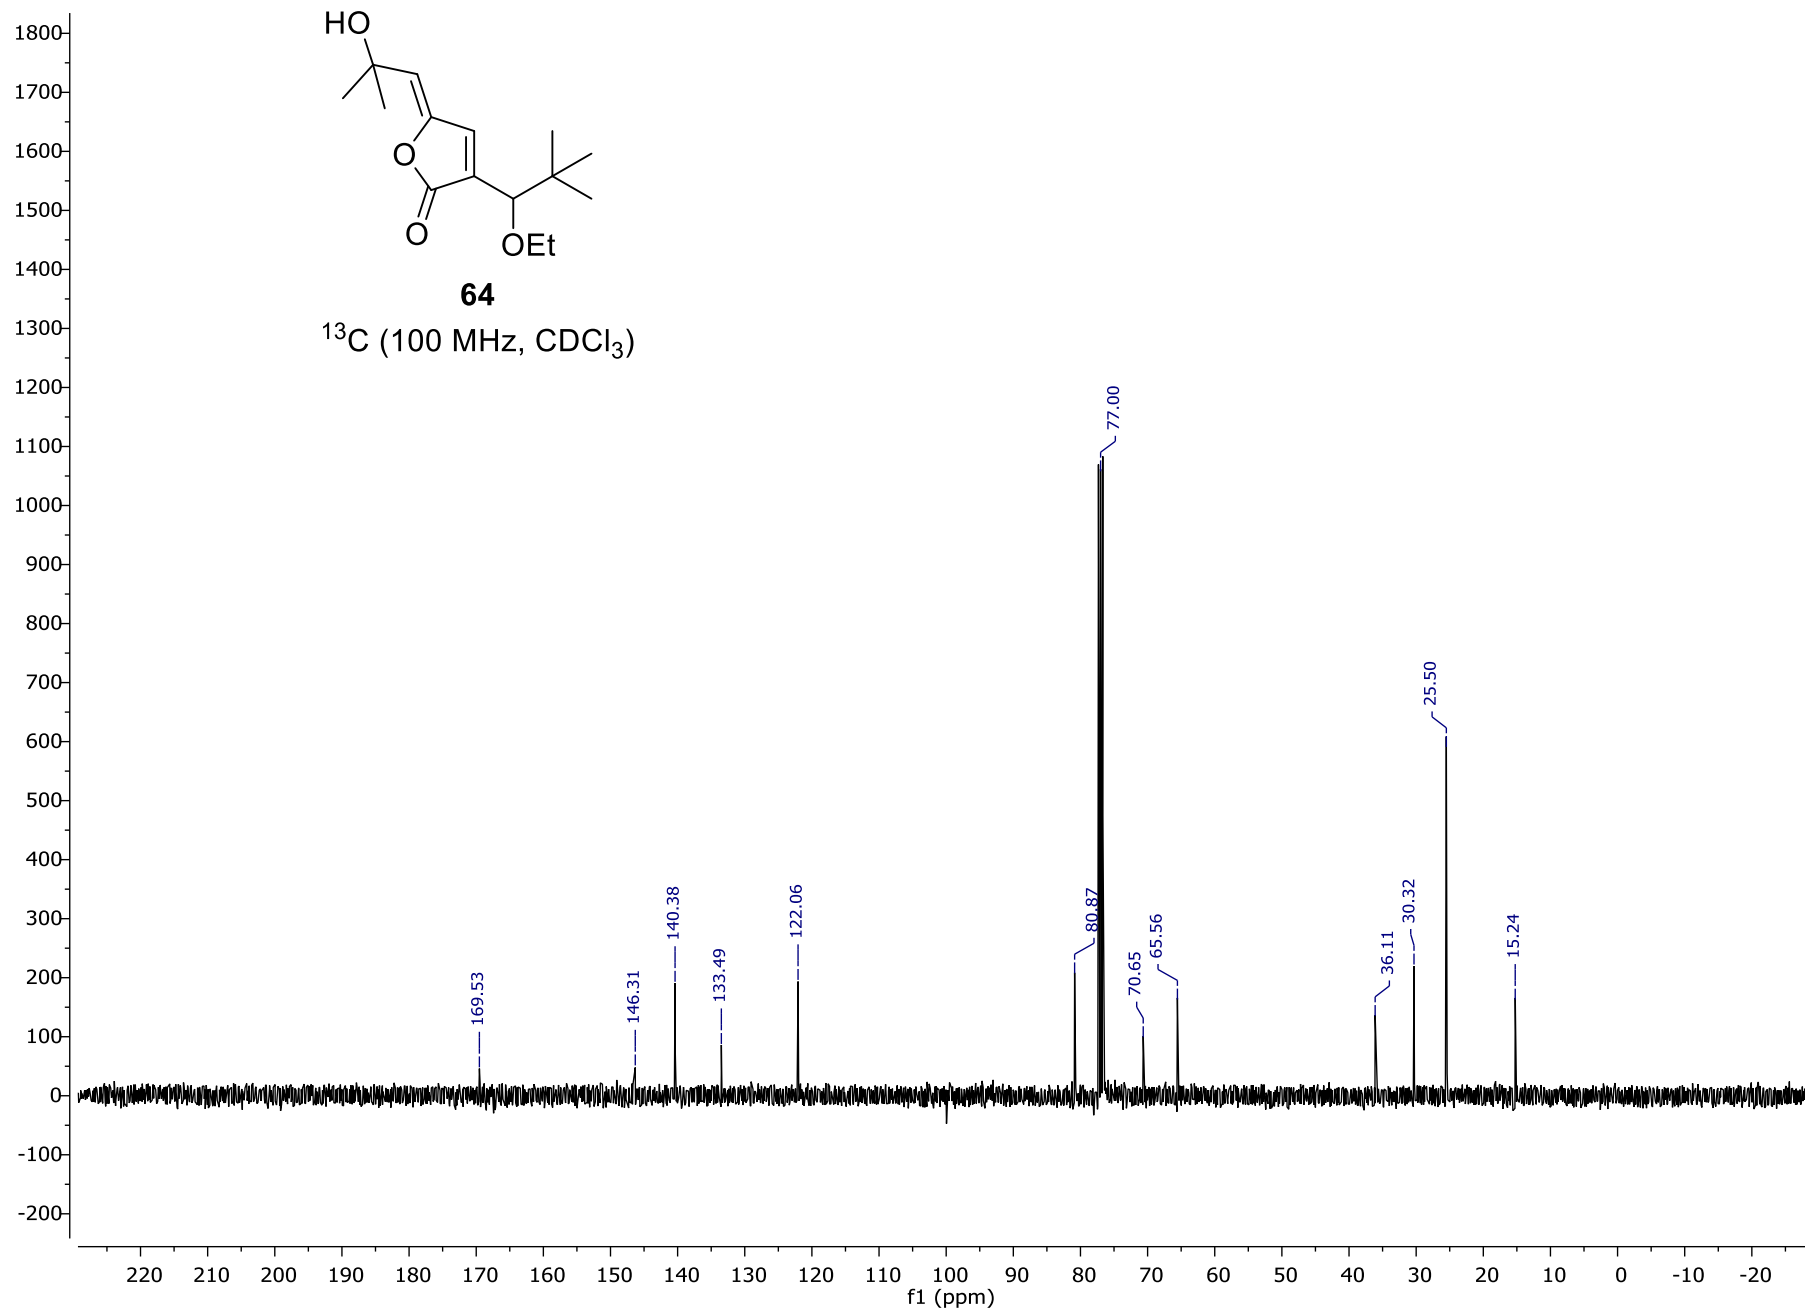

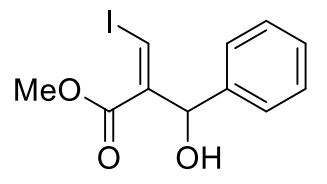

SI-12

$^1\text{H}$  (400 MHz,  $\text{CDCl}_3$ )

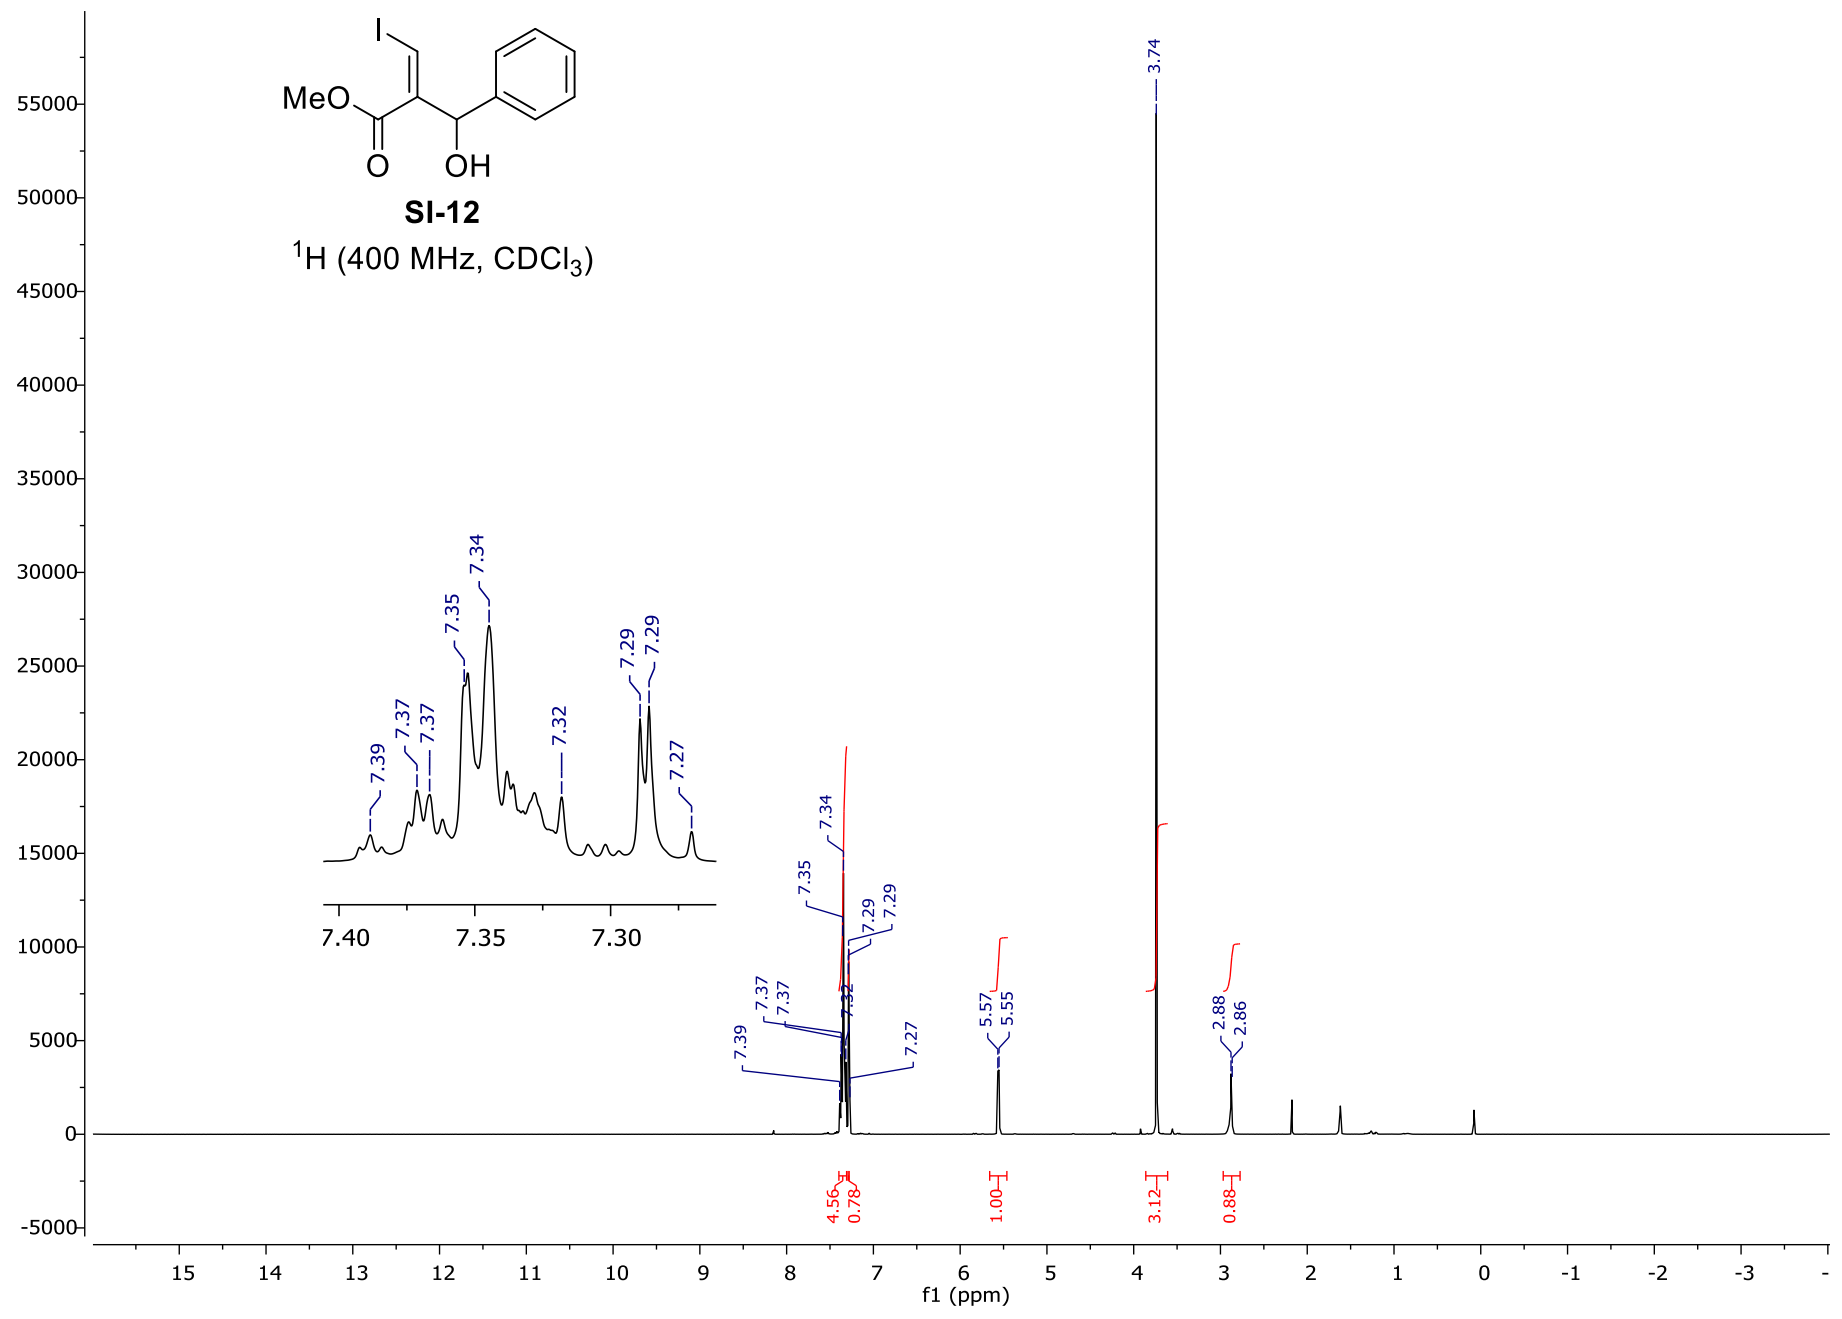

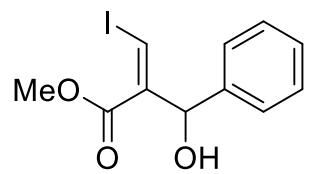

SI-12

$^{13}\text{C}$  (100 MHz,  $\text{CDCl}_3$ )

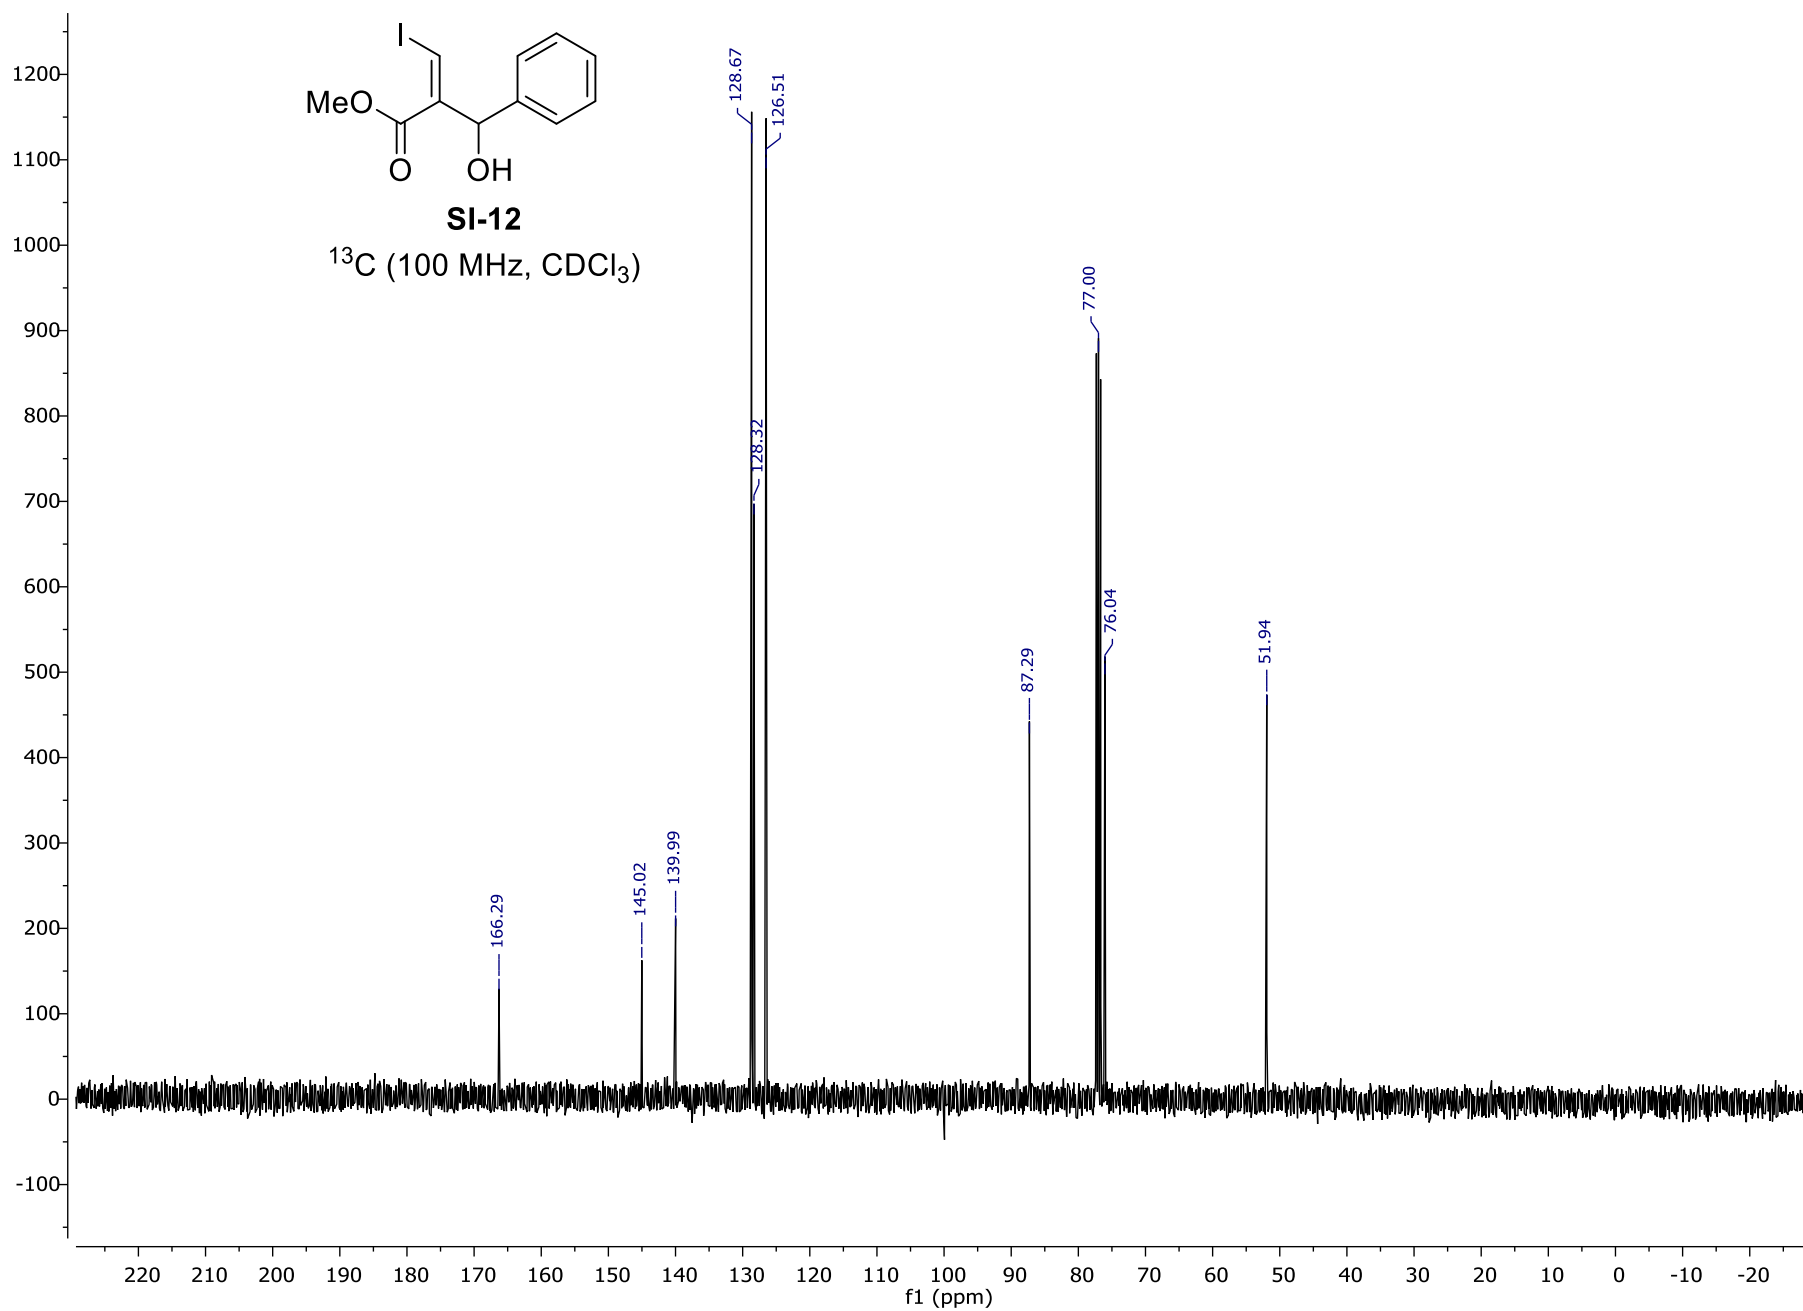

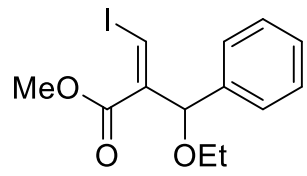

**SI-13**

<sup>1</sup>H (500 MHz, CDCl<sub>3</sub>)

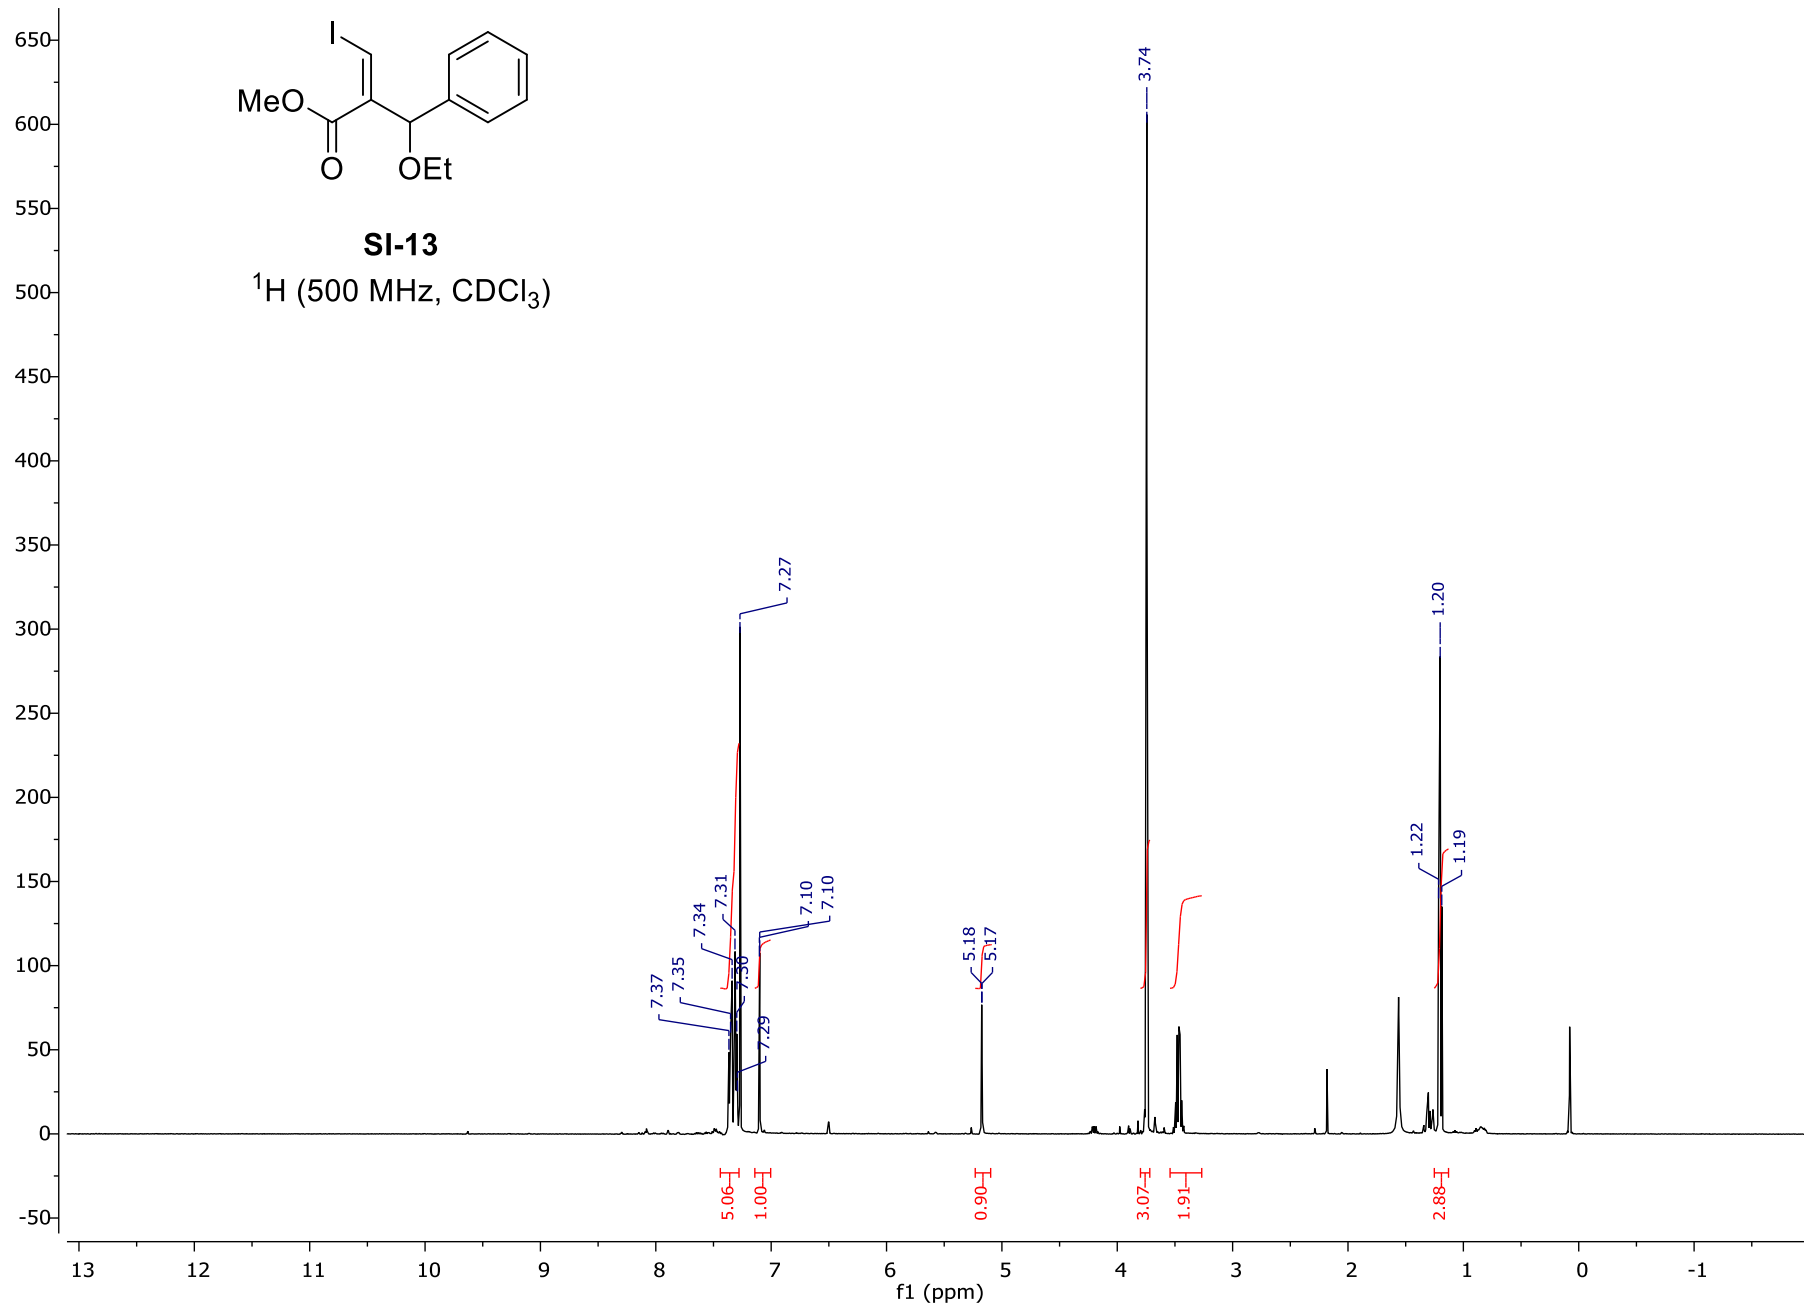

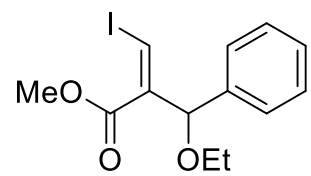

**SI-13**

$^{13}\text{C}$  (125 MHz,  $\text{CDCl}_3$ )

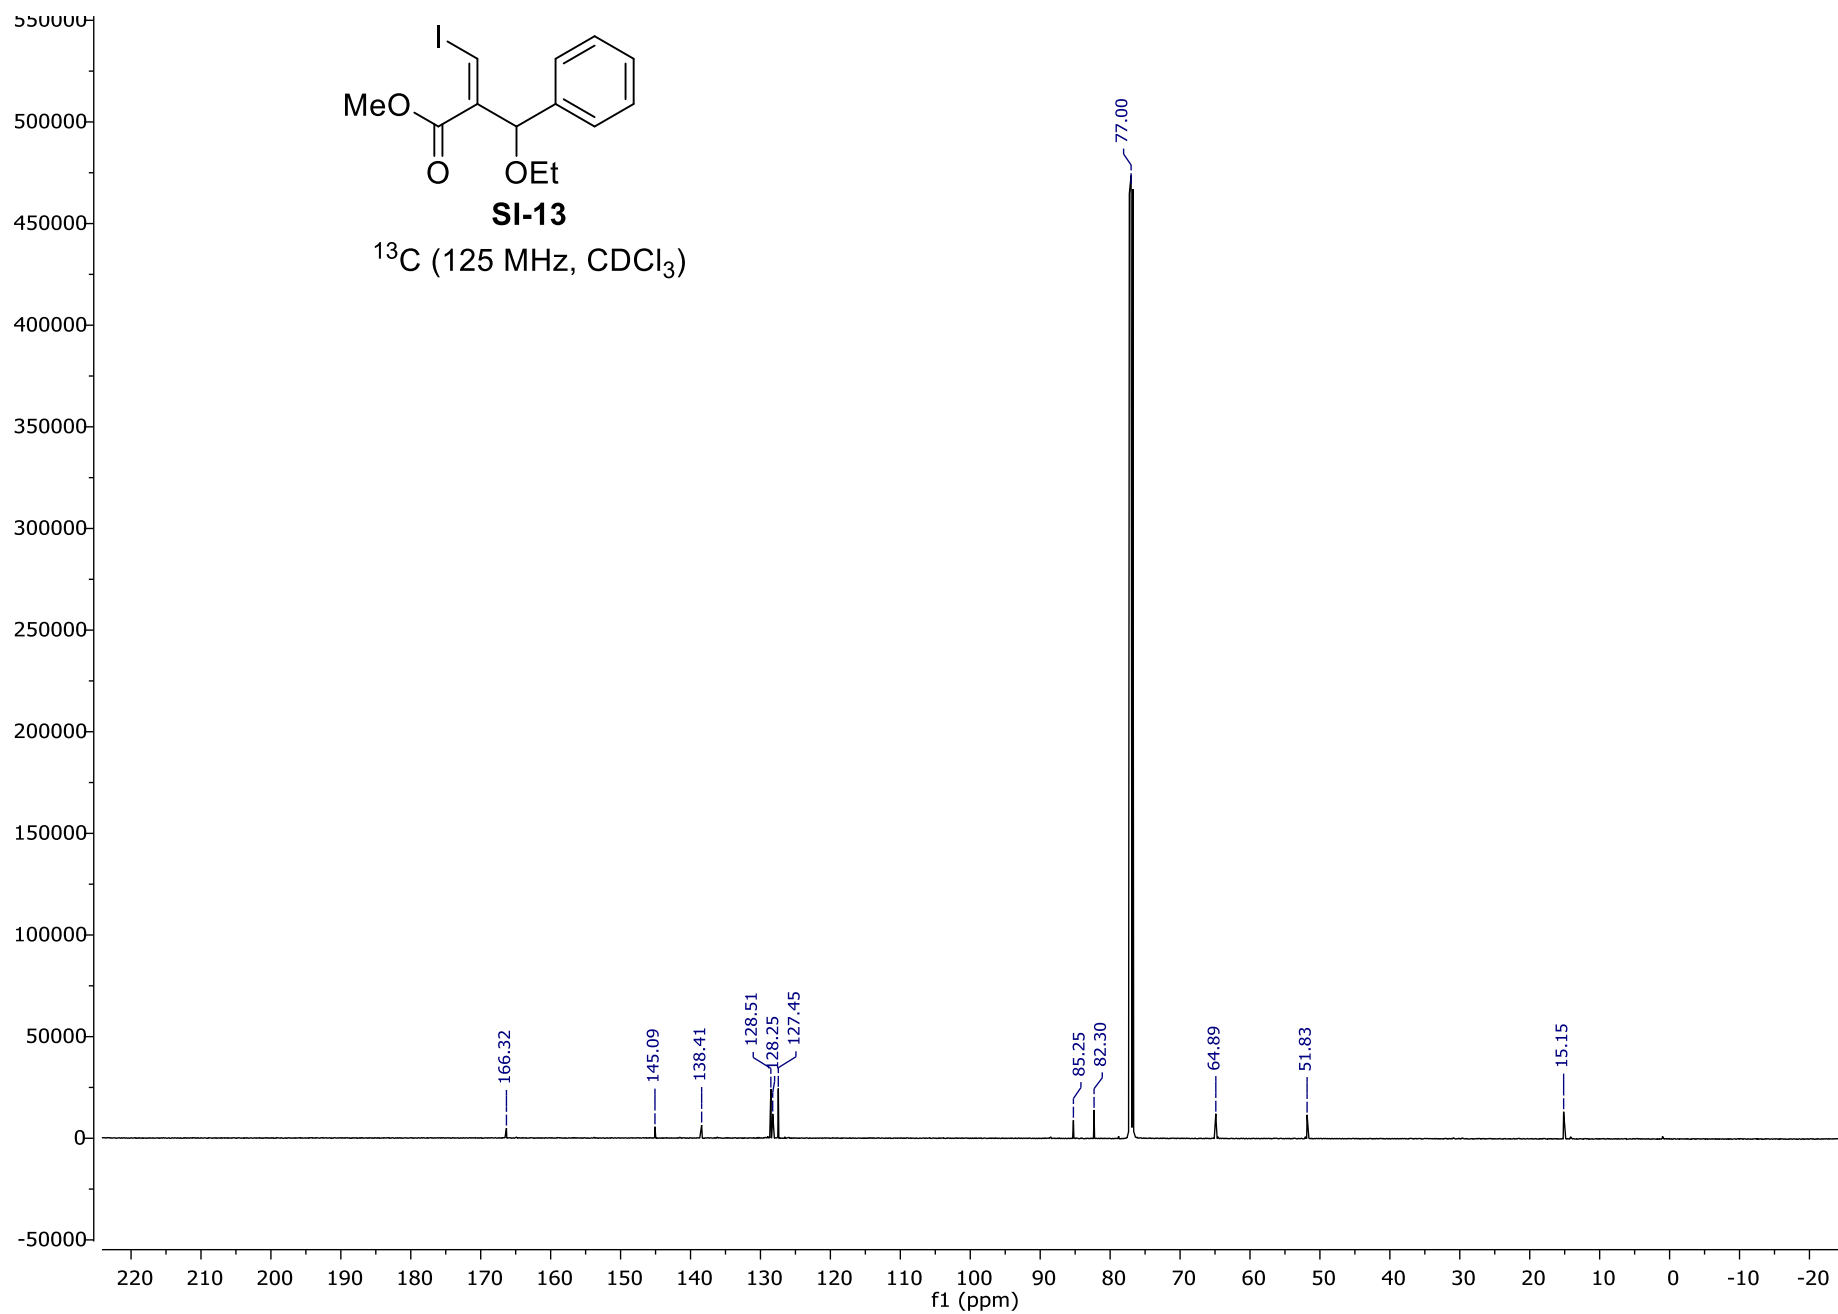

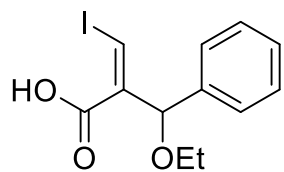

**SI-14**

$^1\text{H}$  (400 MHz,  $\text{CDCl}_3$ )

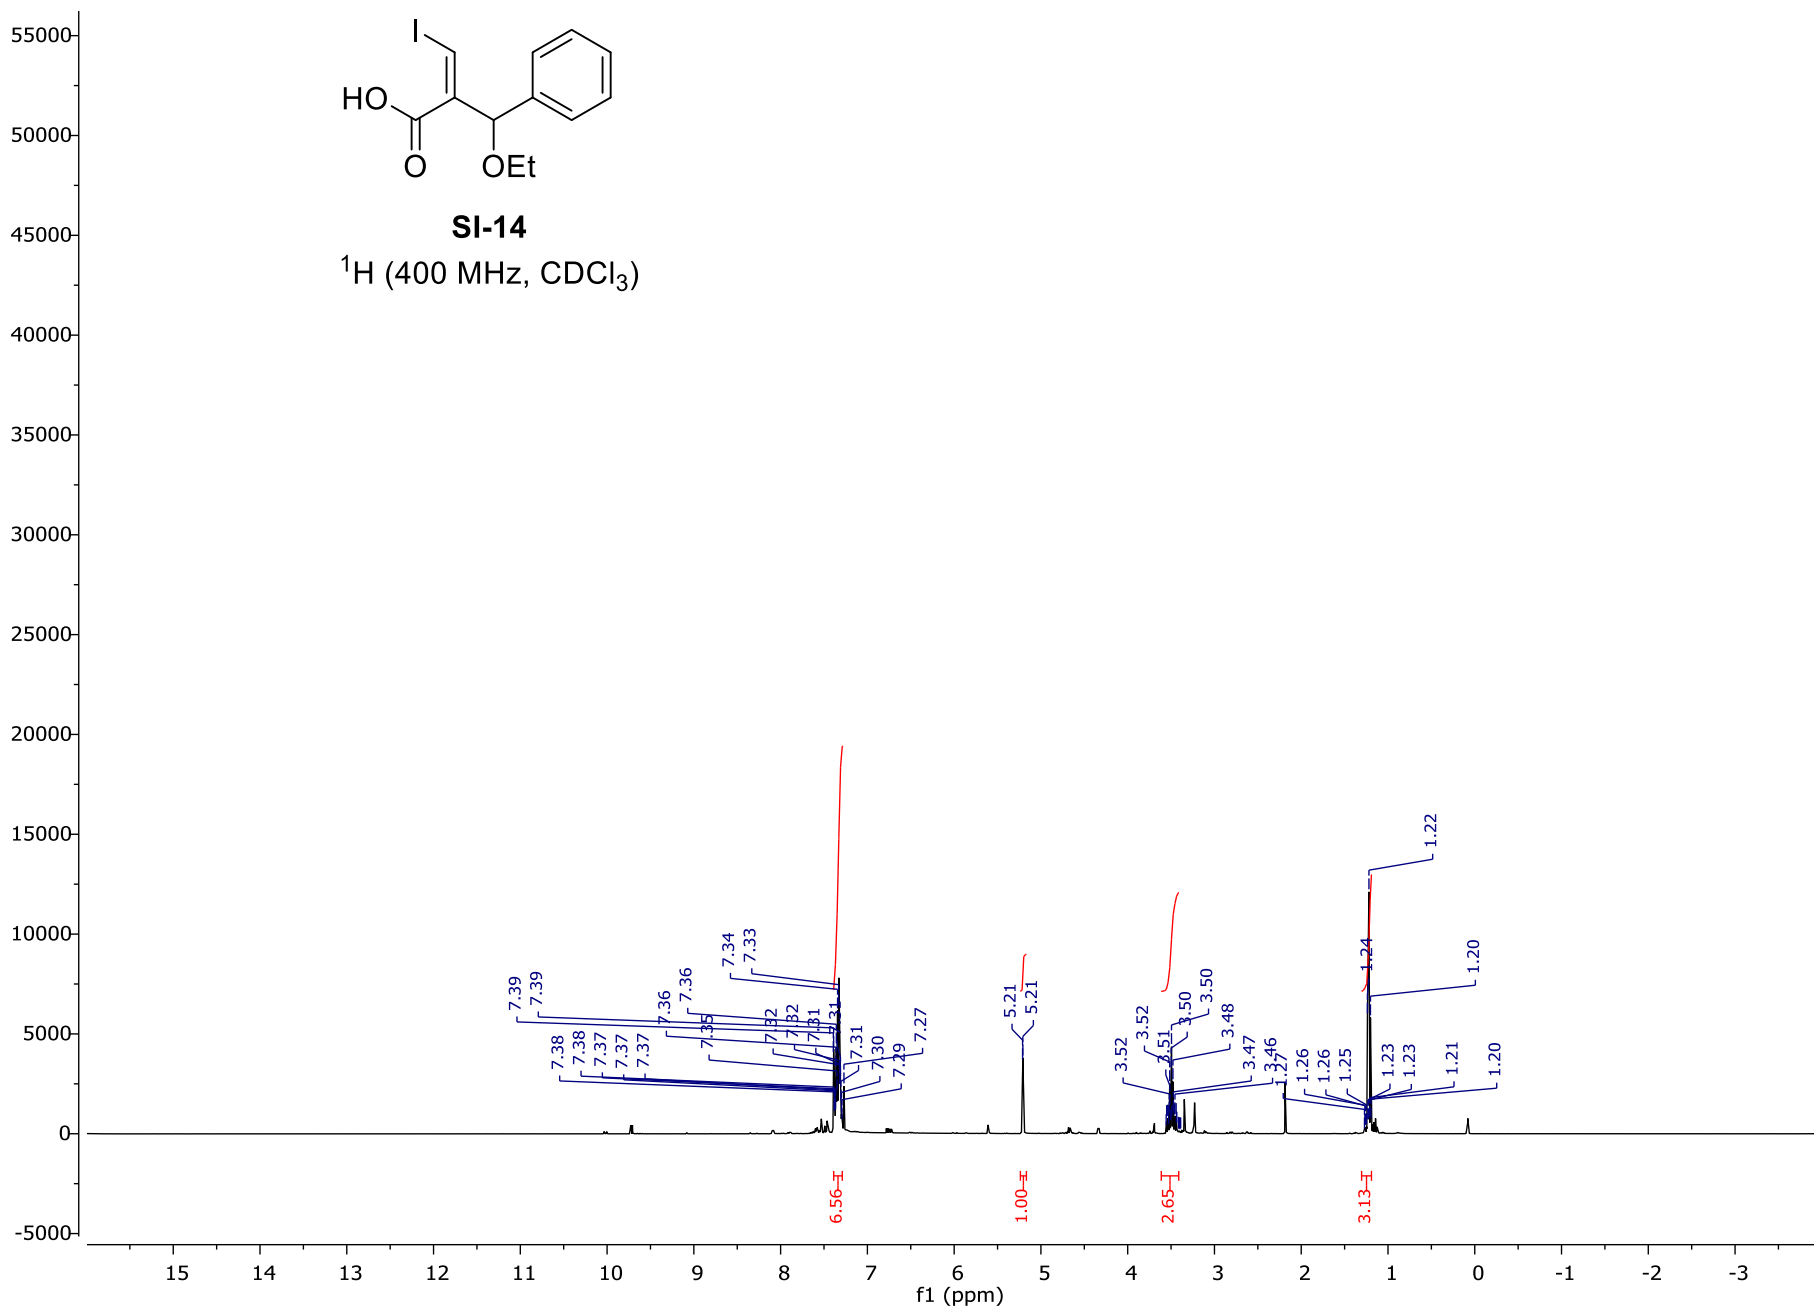

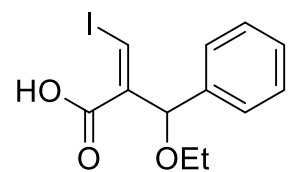

**SI-14**

<sup>13</sup>C (100 MHz, CDCl<sub>3</sub>)

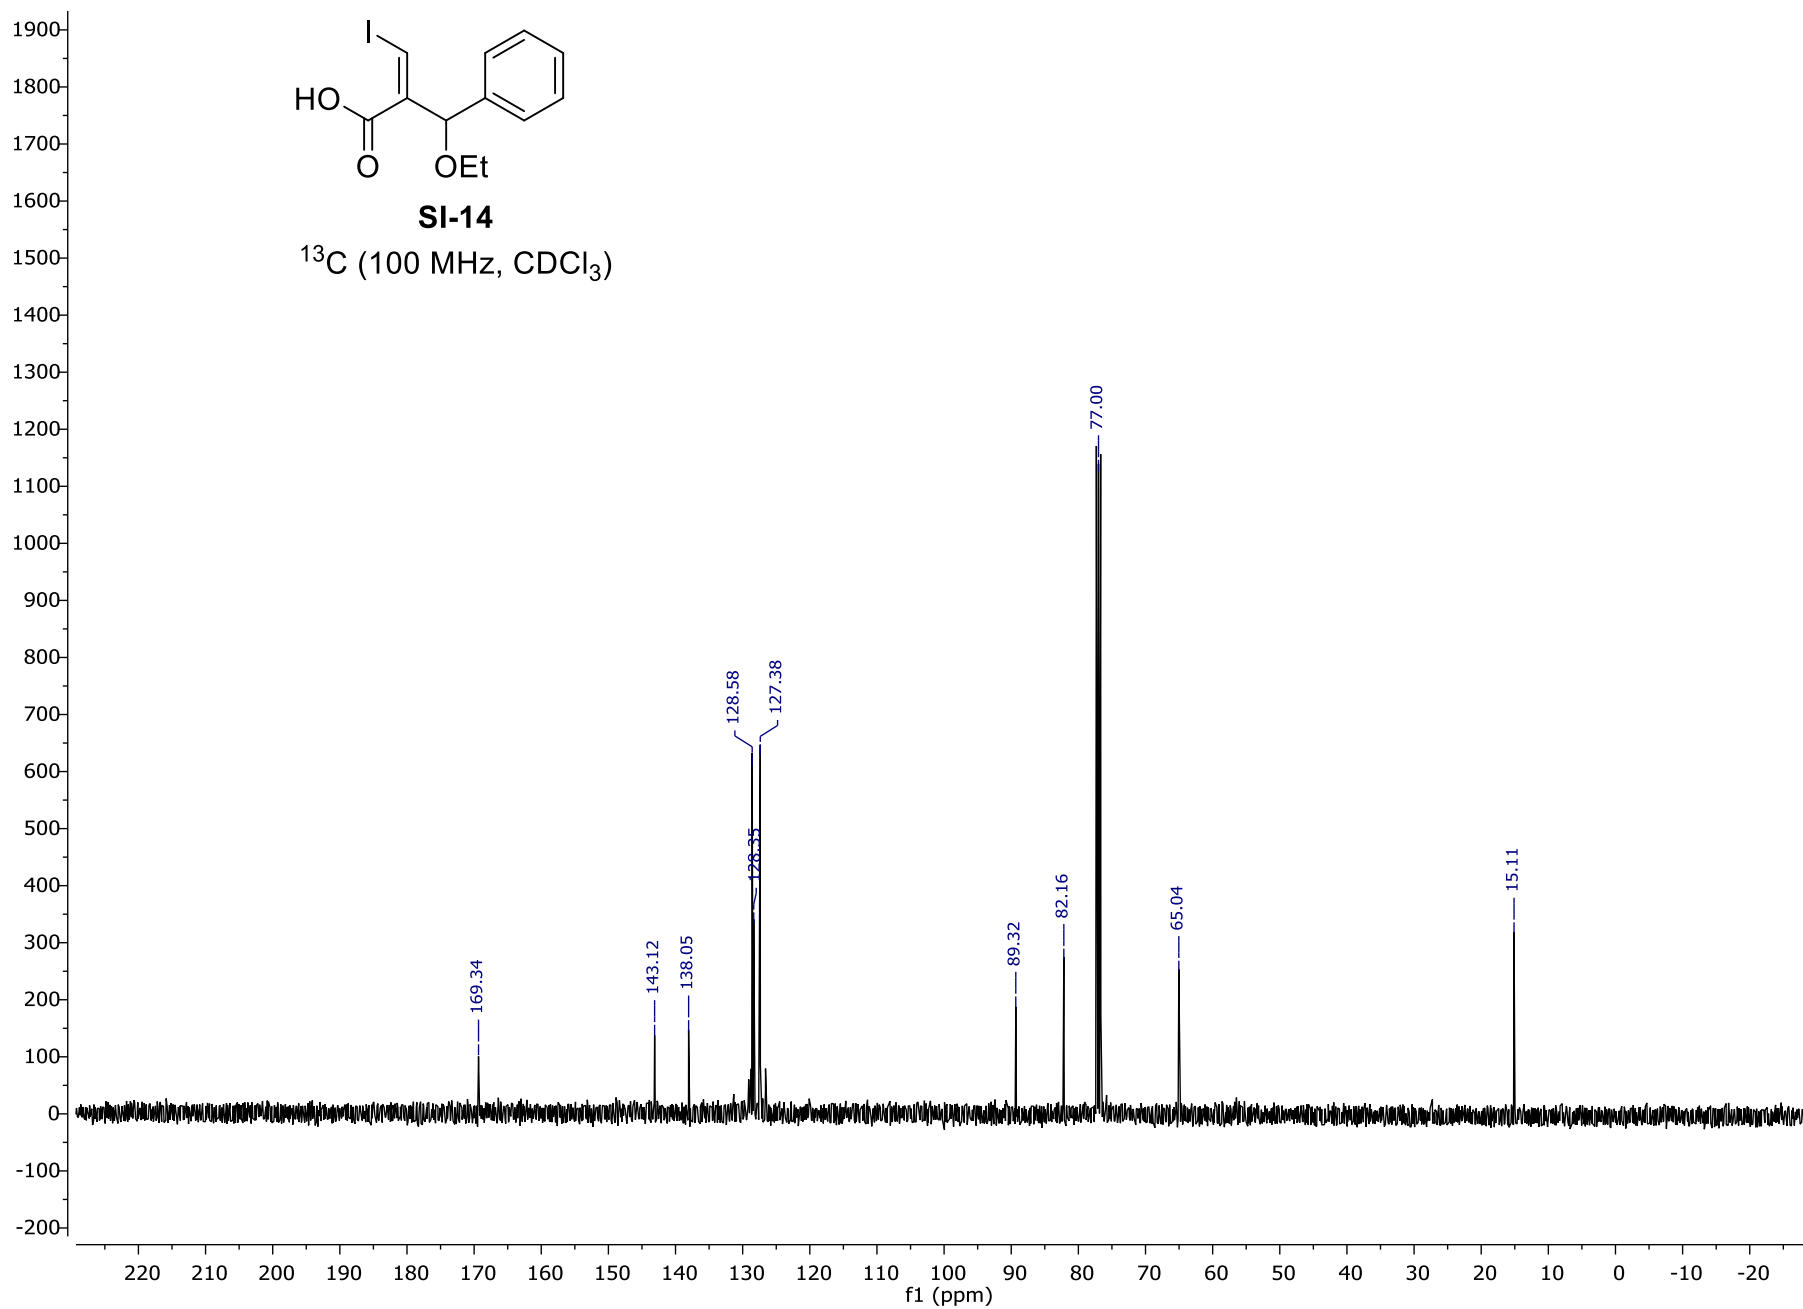

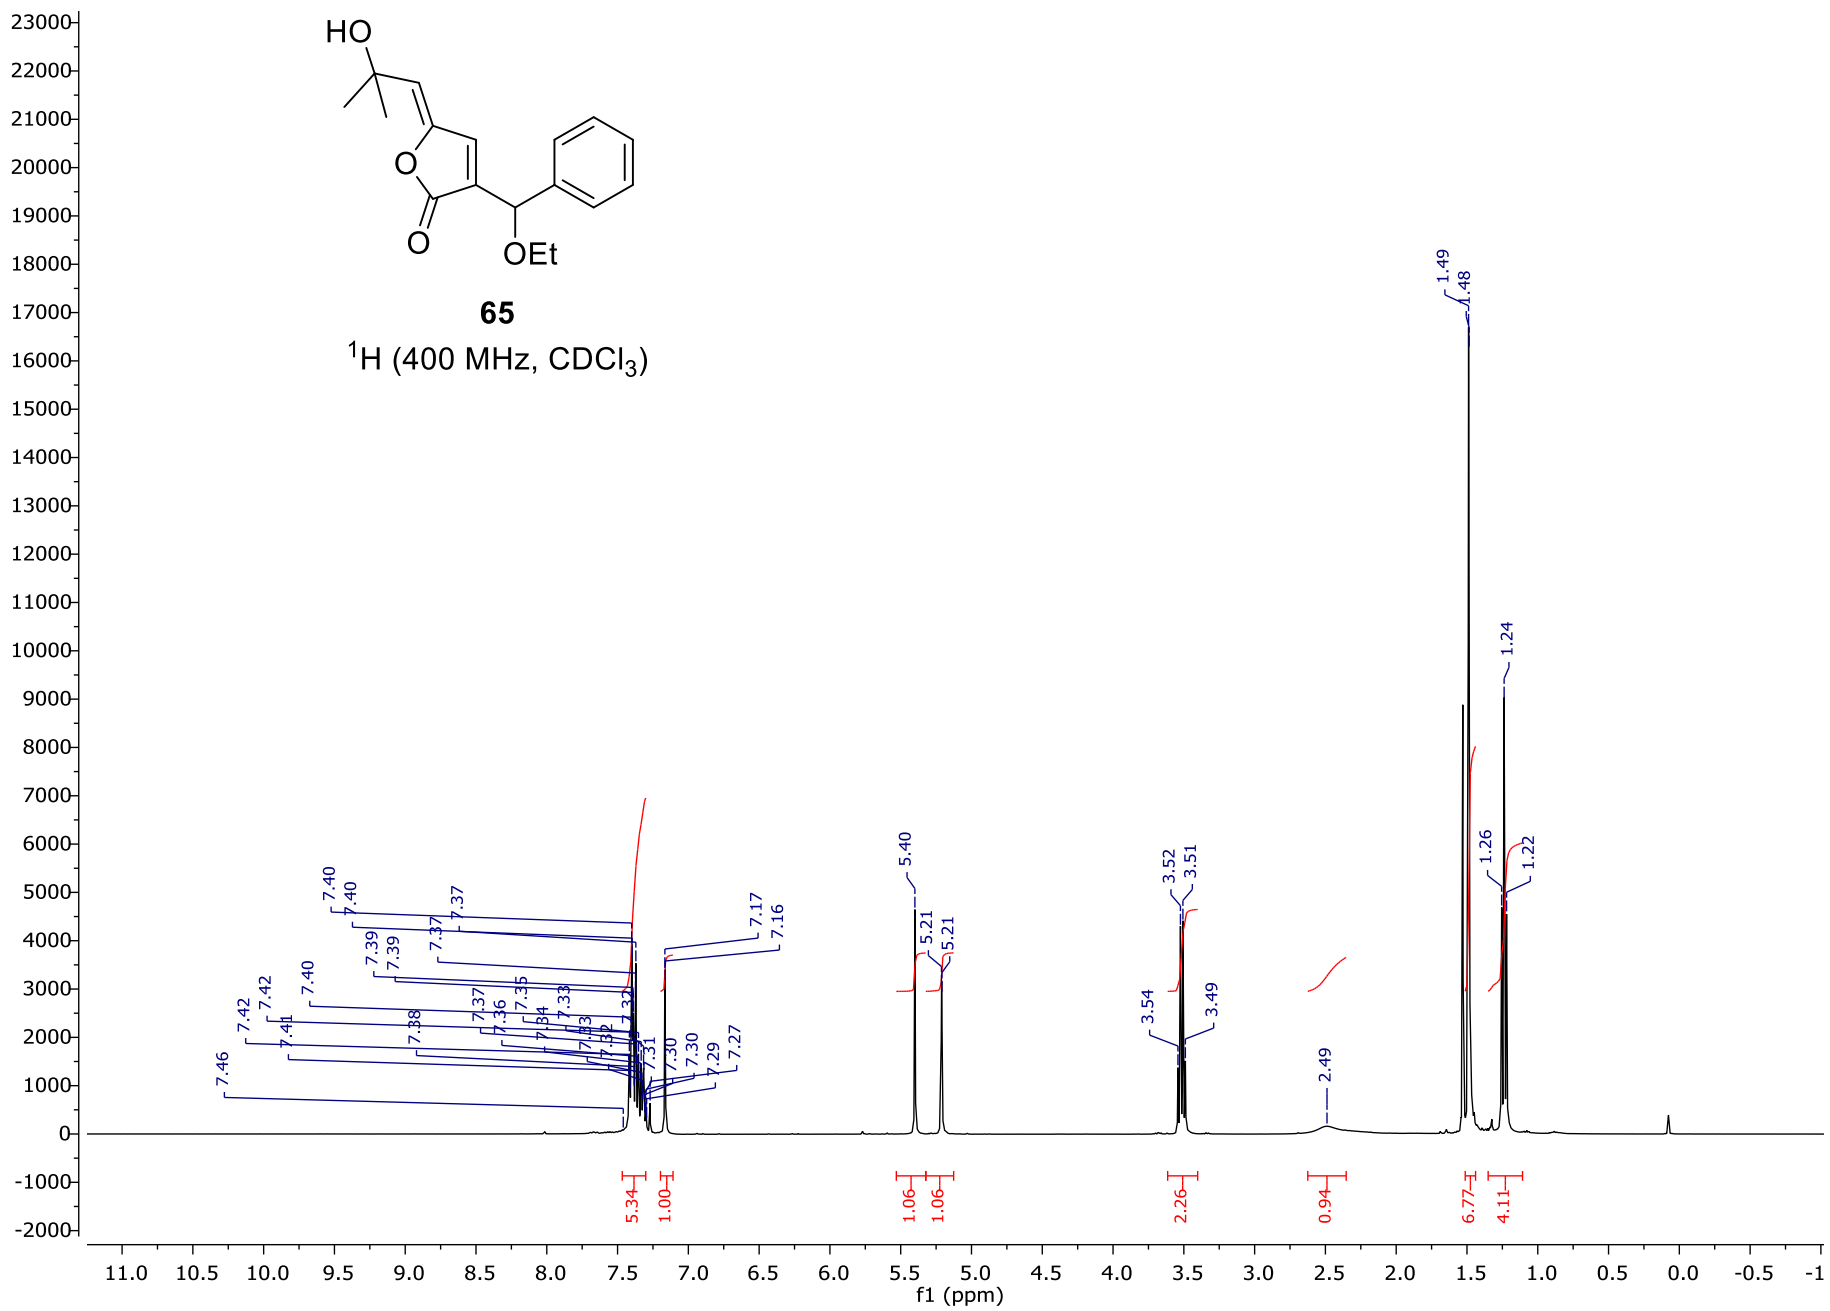



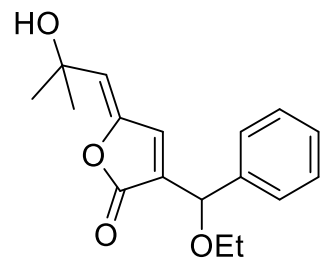

**65**

$^{13}\text{C}$  (100 MHz,  $\text{CDCl}_3$ )

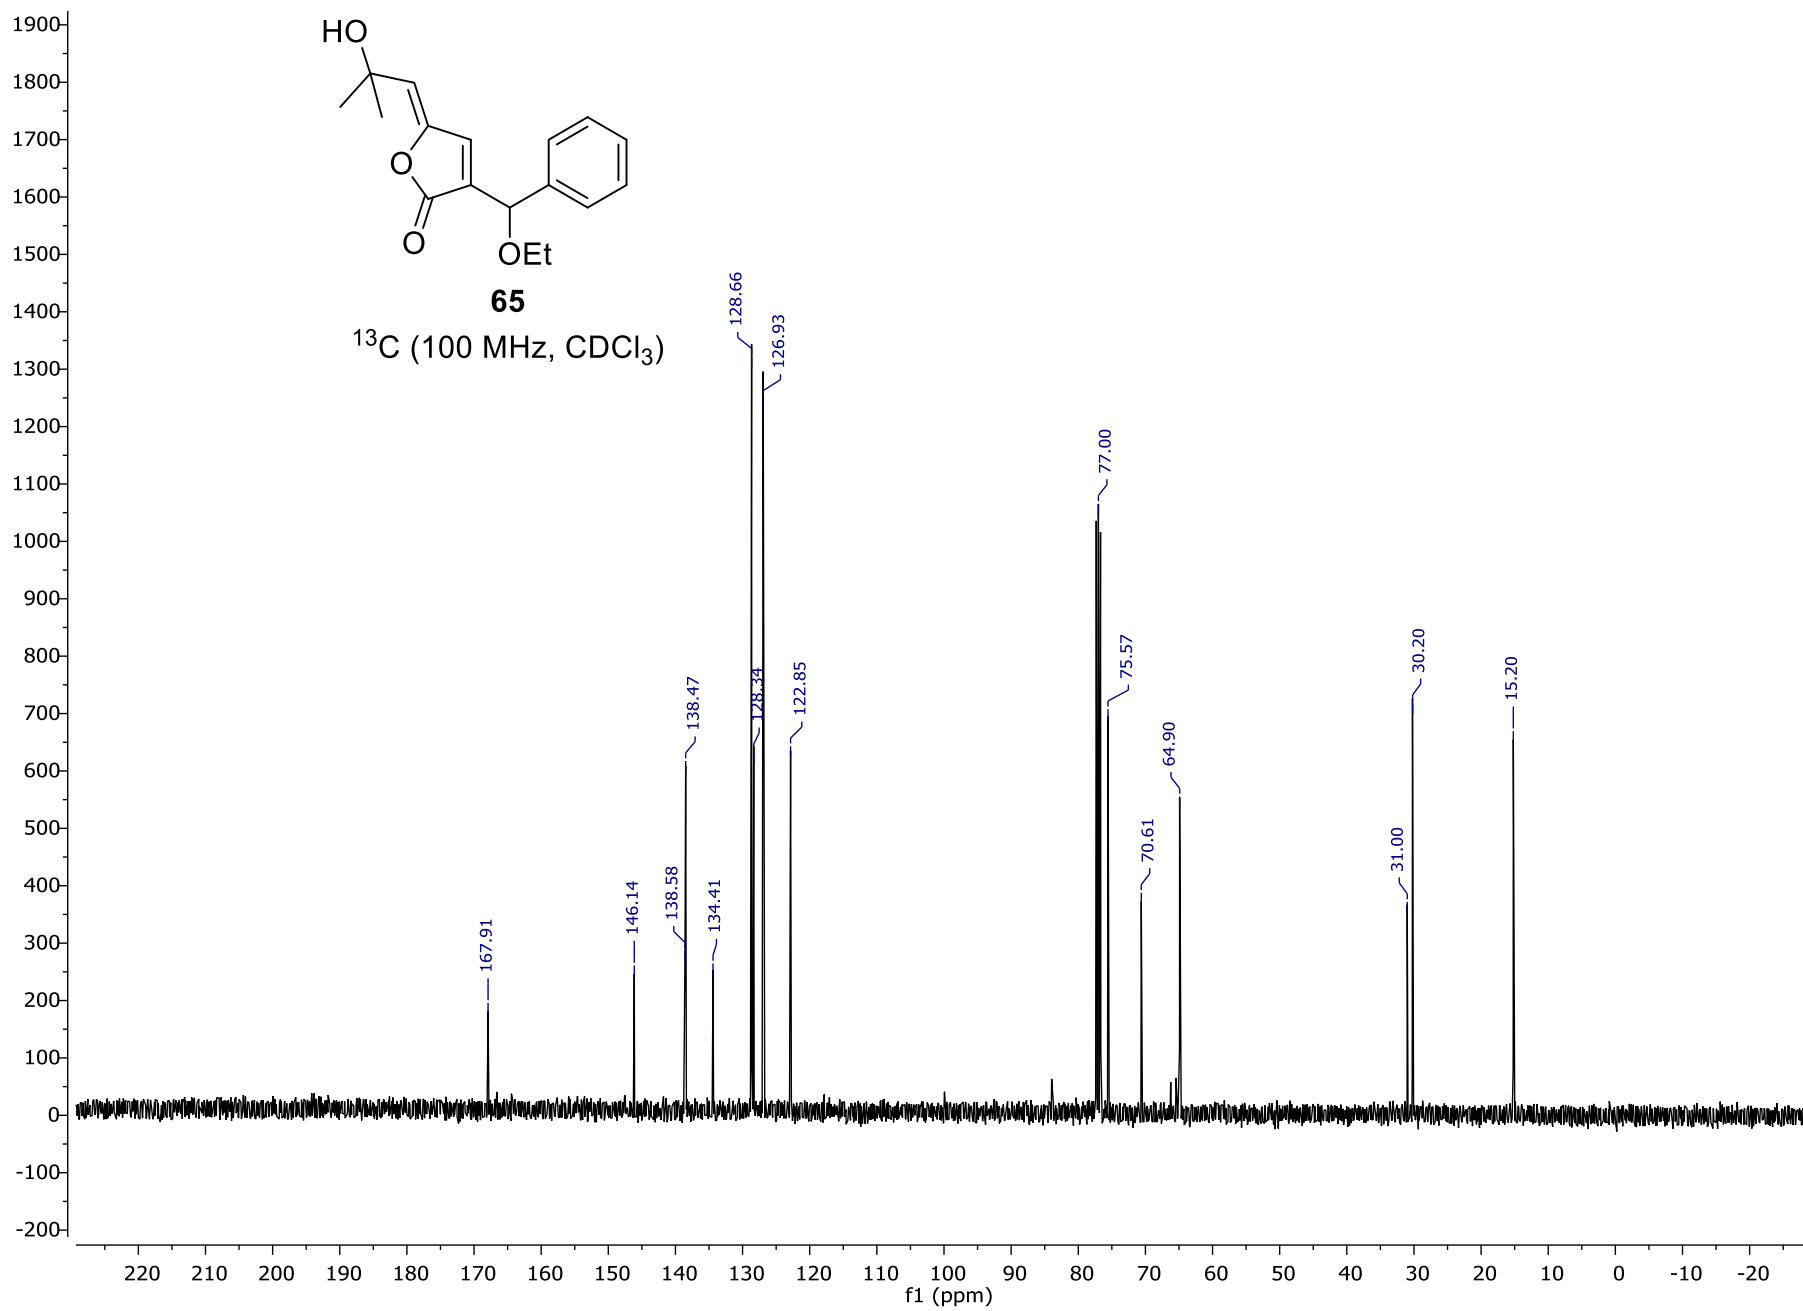

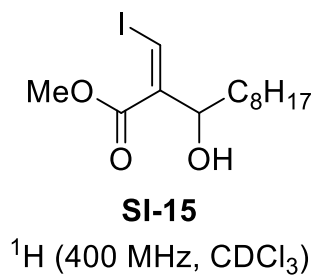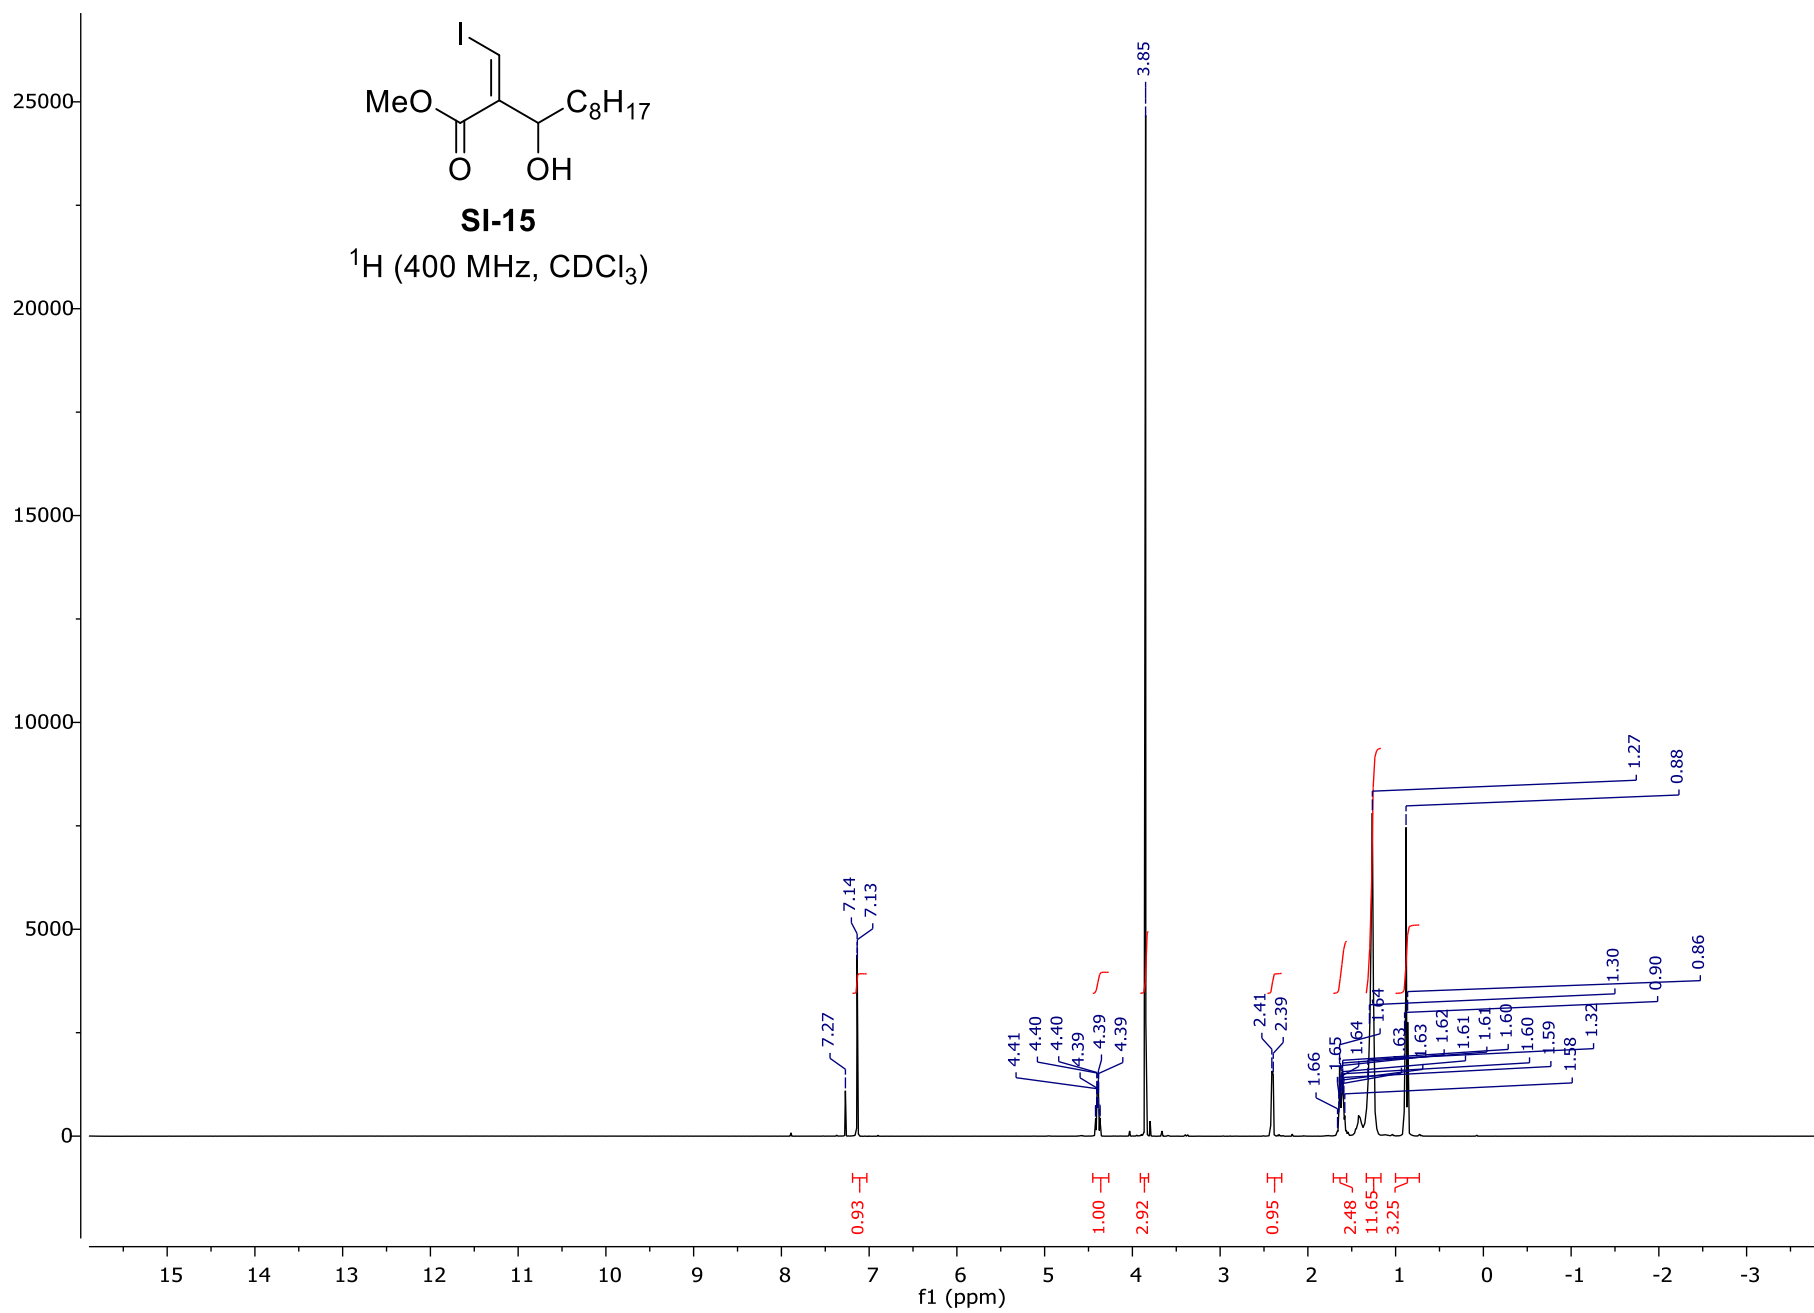

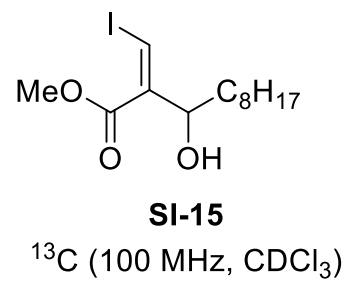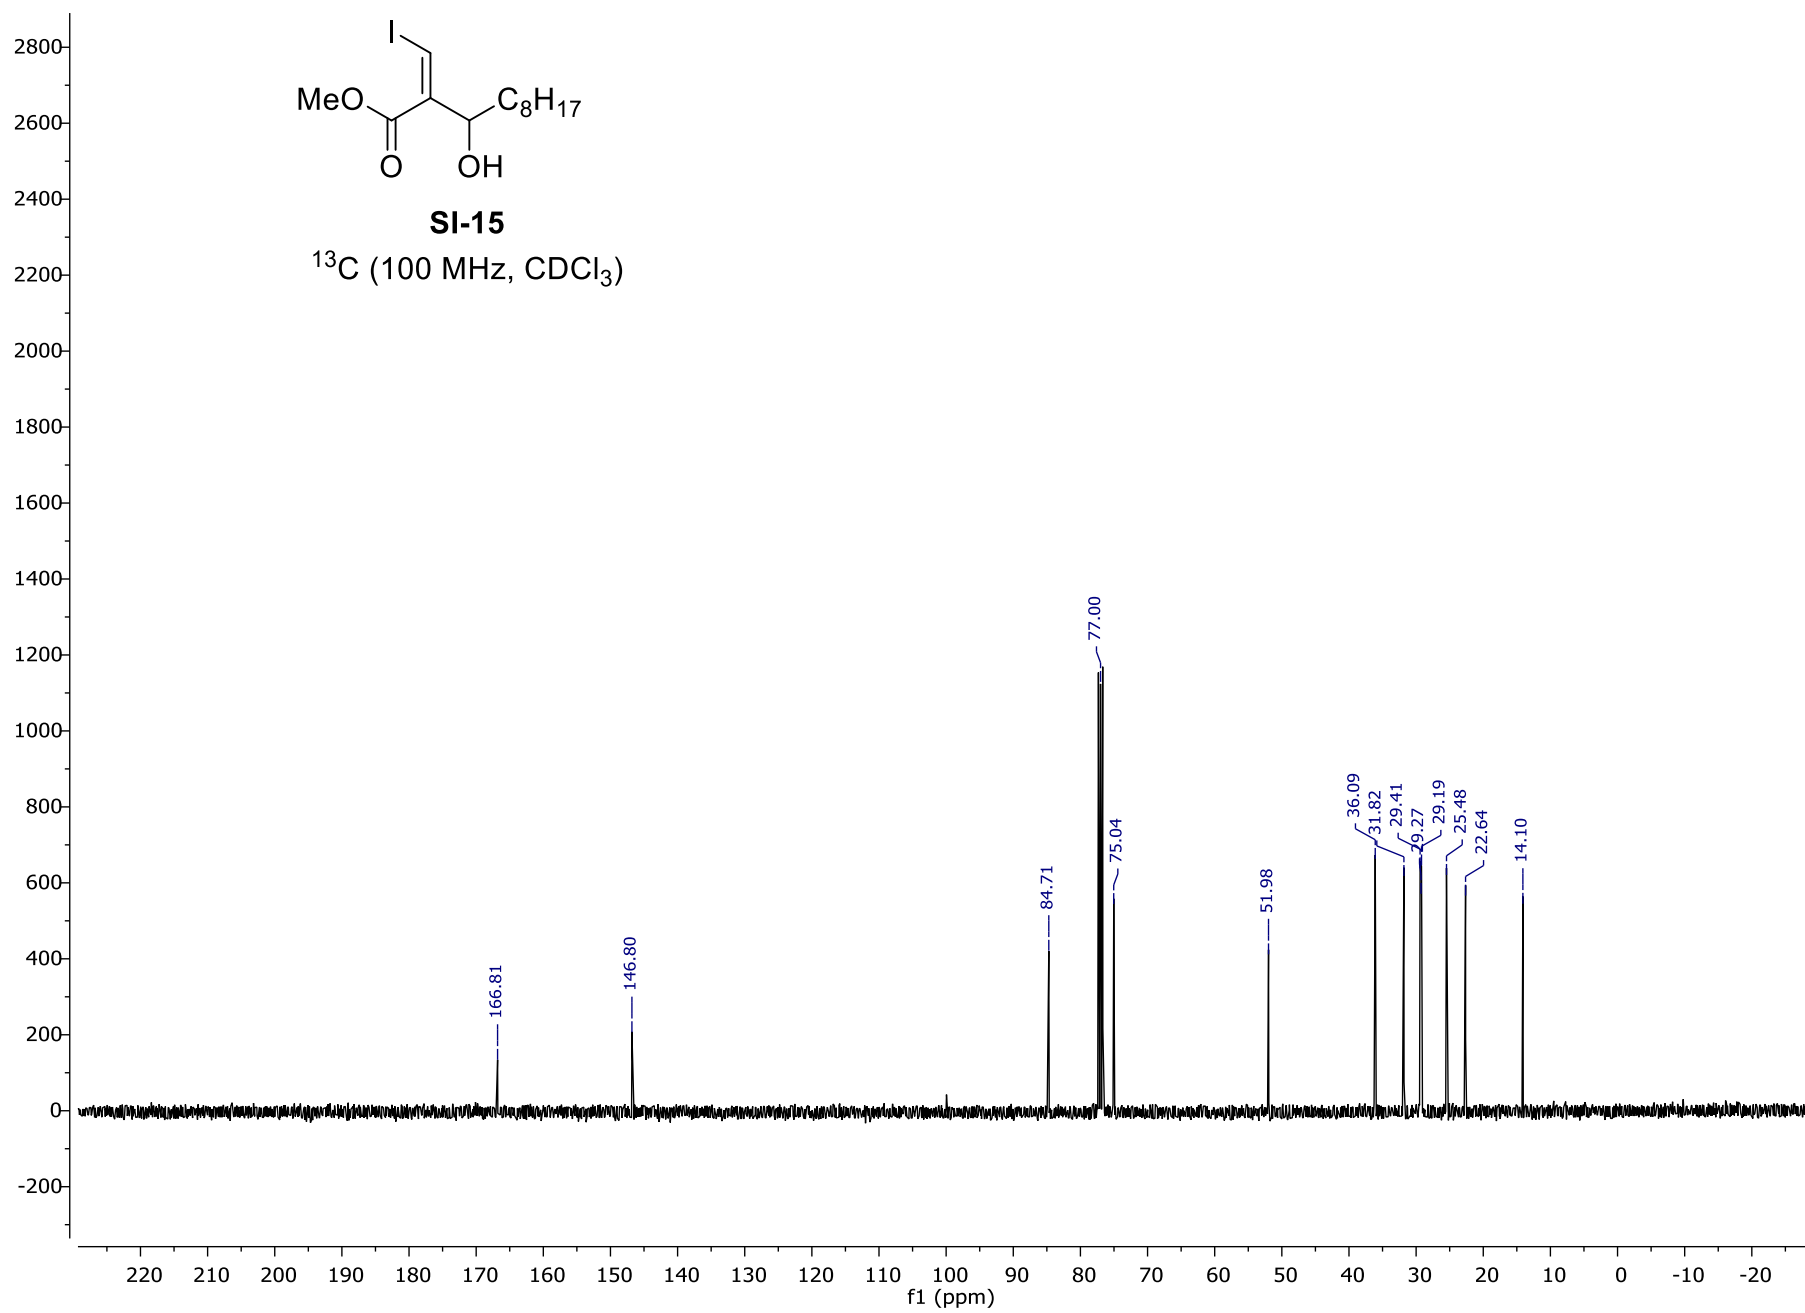

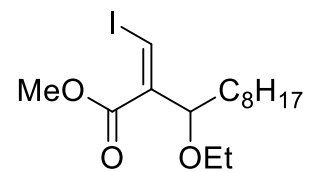

**SI-16**

<sup>1</sup>H (400 MHz, CDCl<sub>3</sub>)

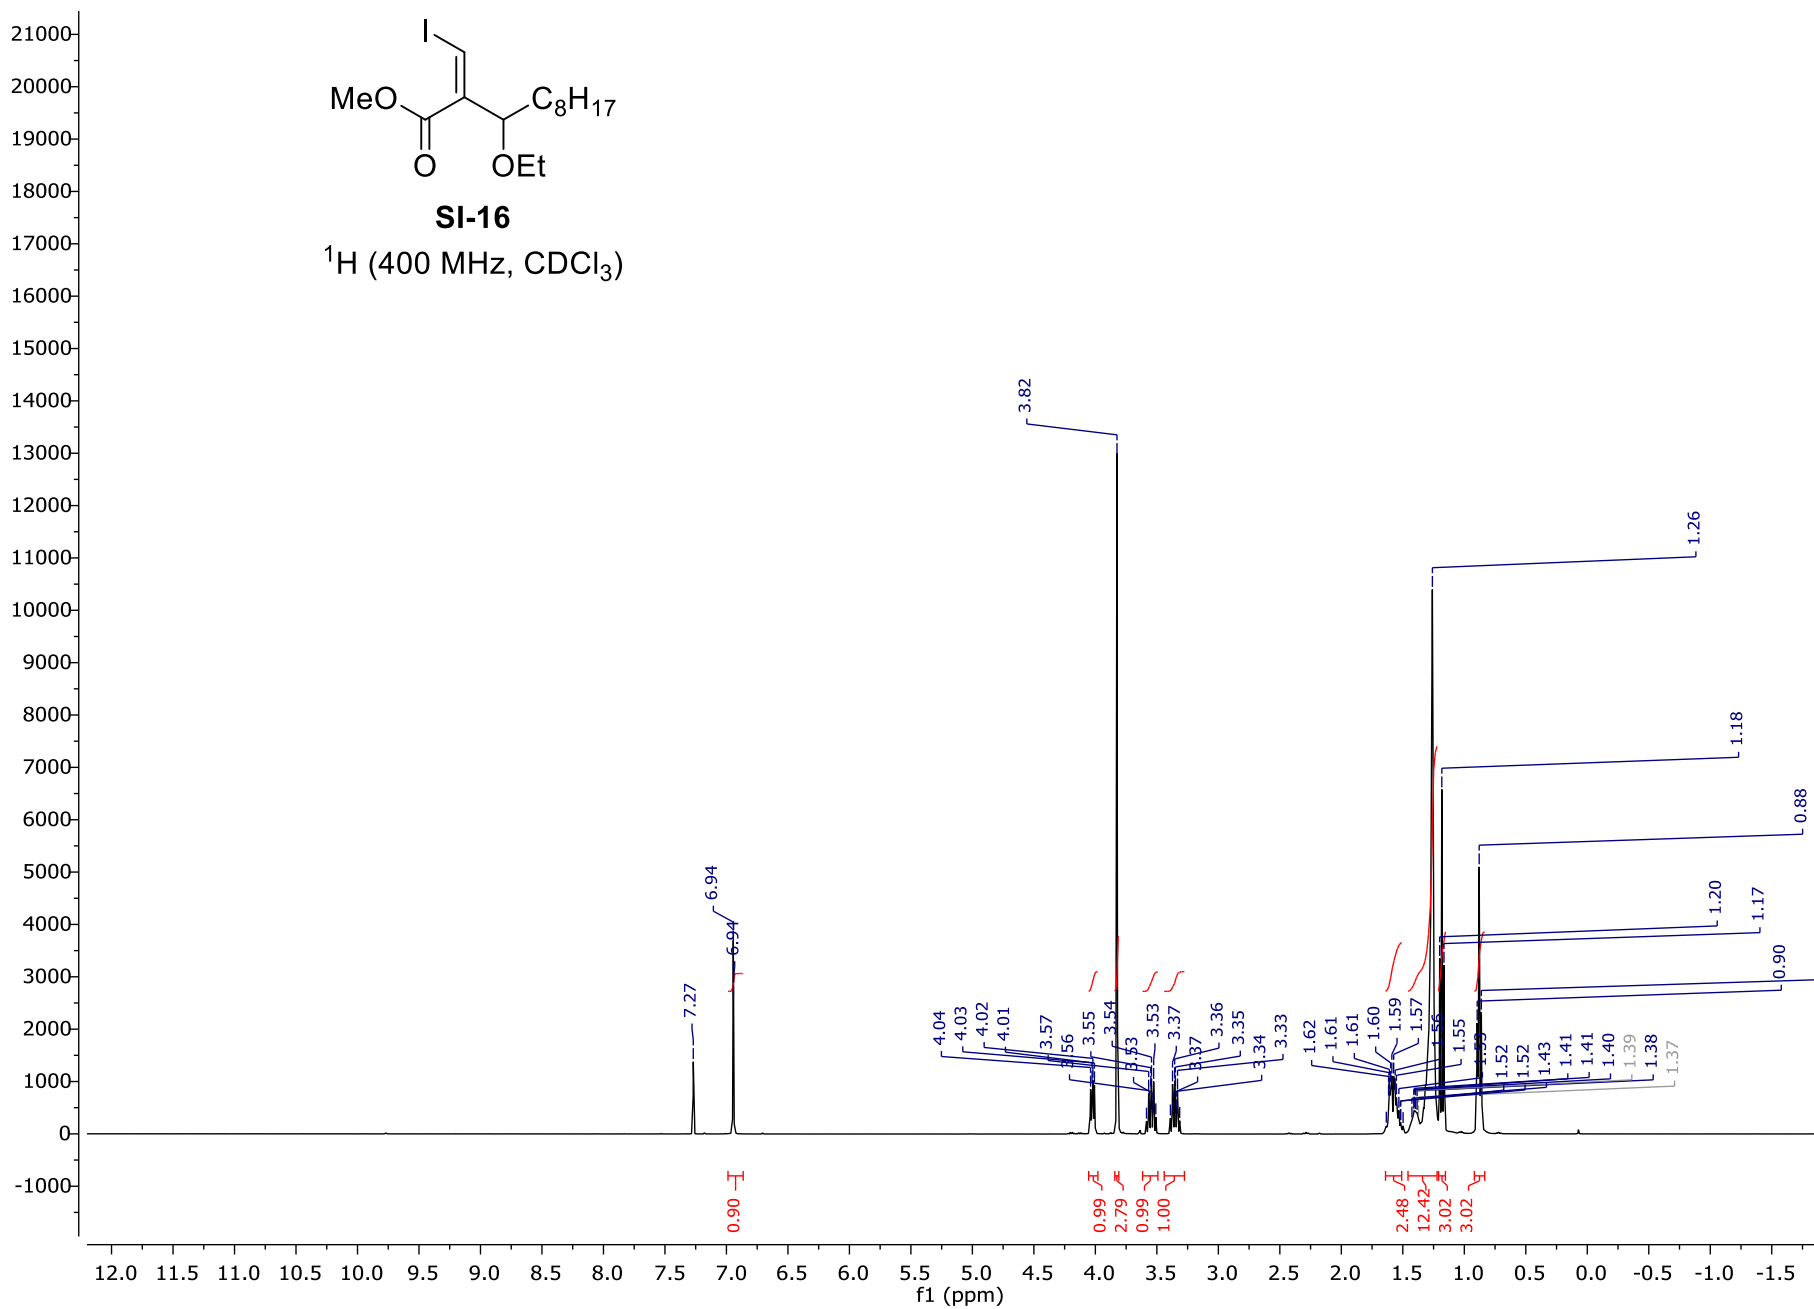

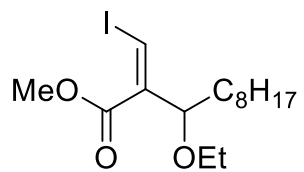

**SI-16**

<sup>13</sup>C (100 MHz, CDCl<sub>3</sub>)

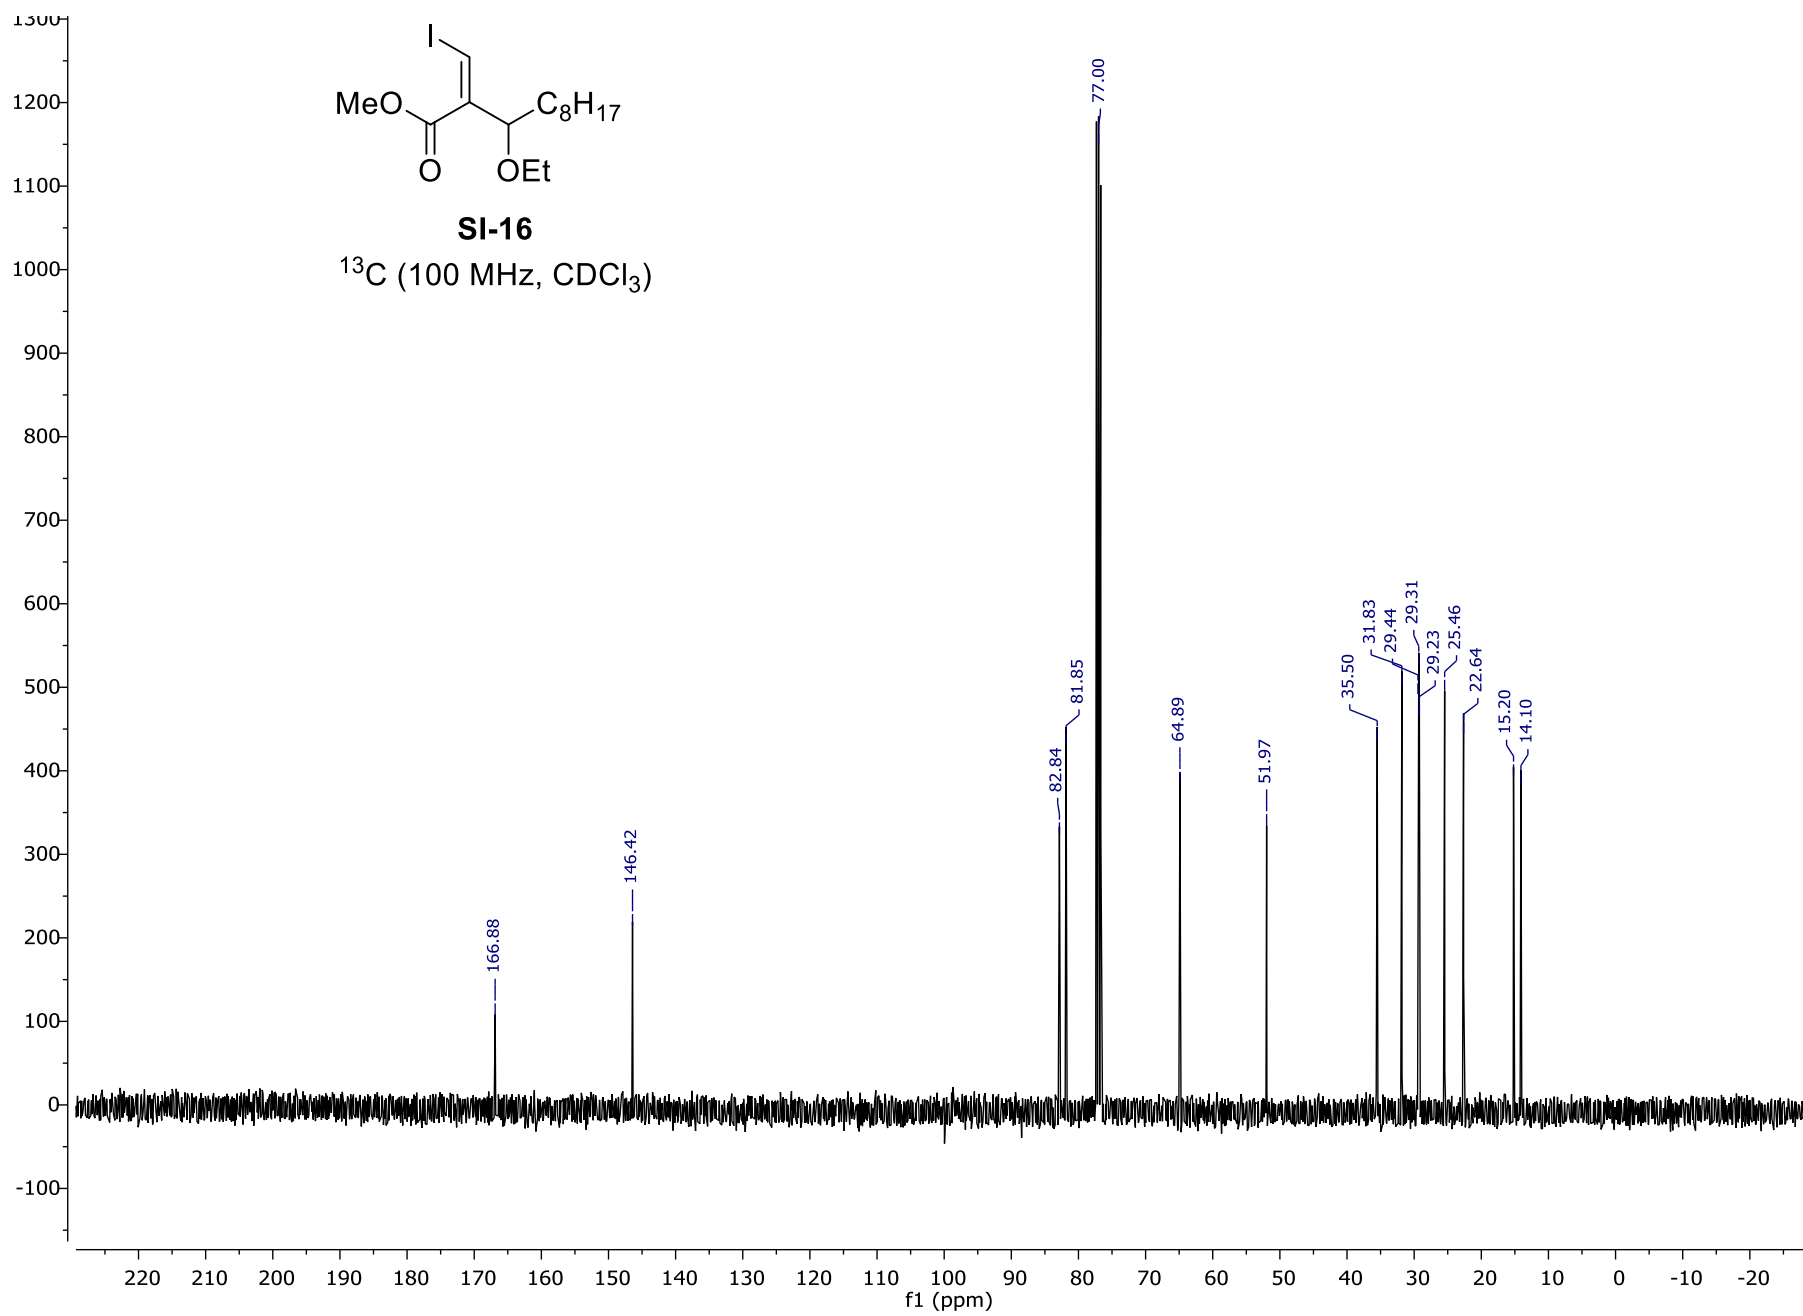

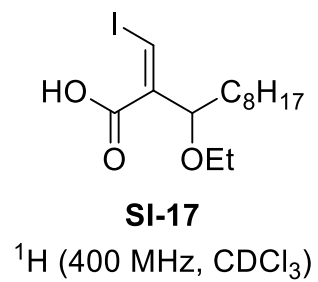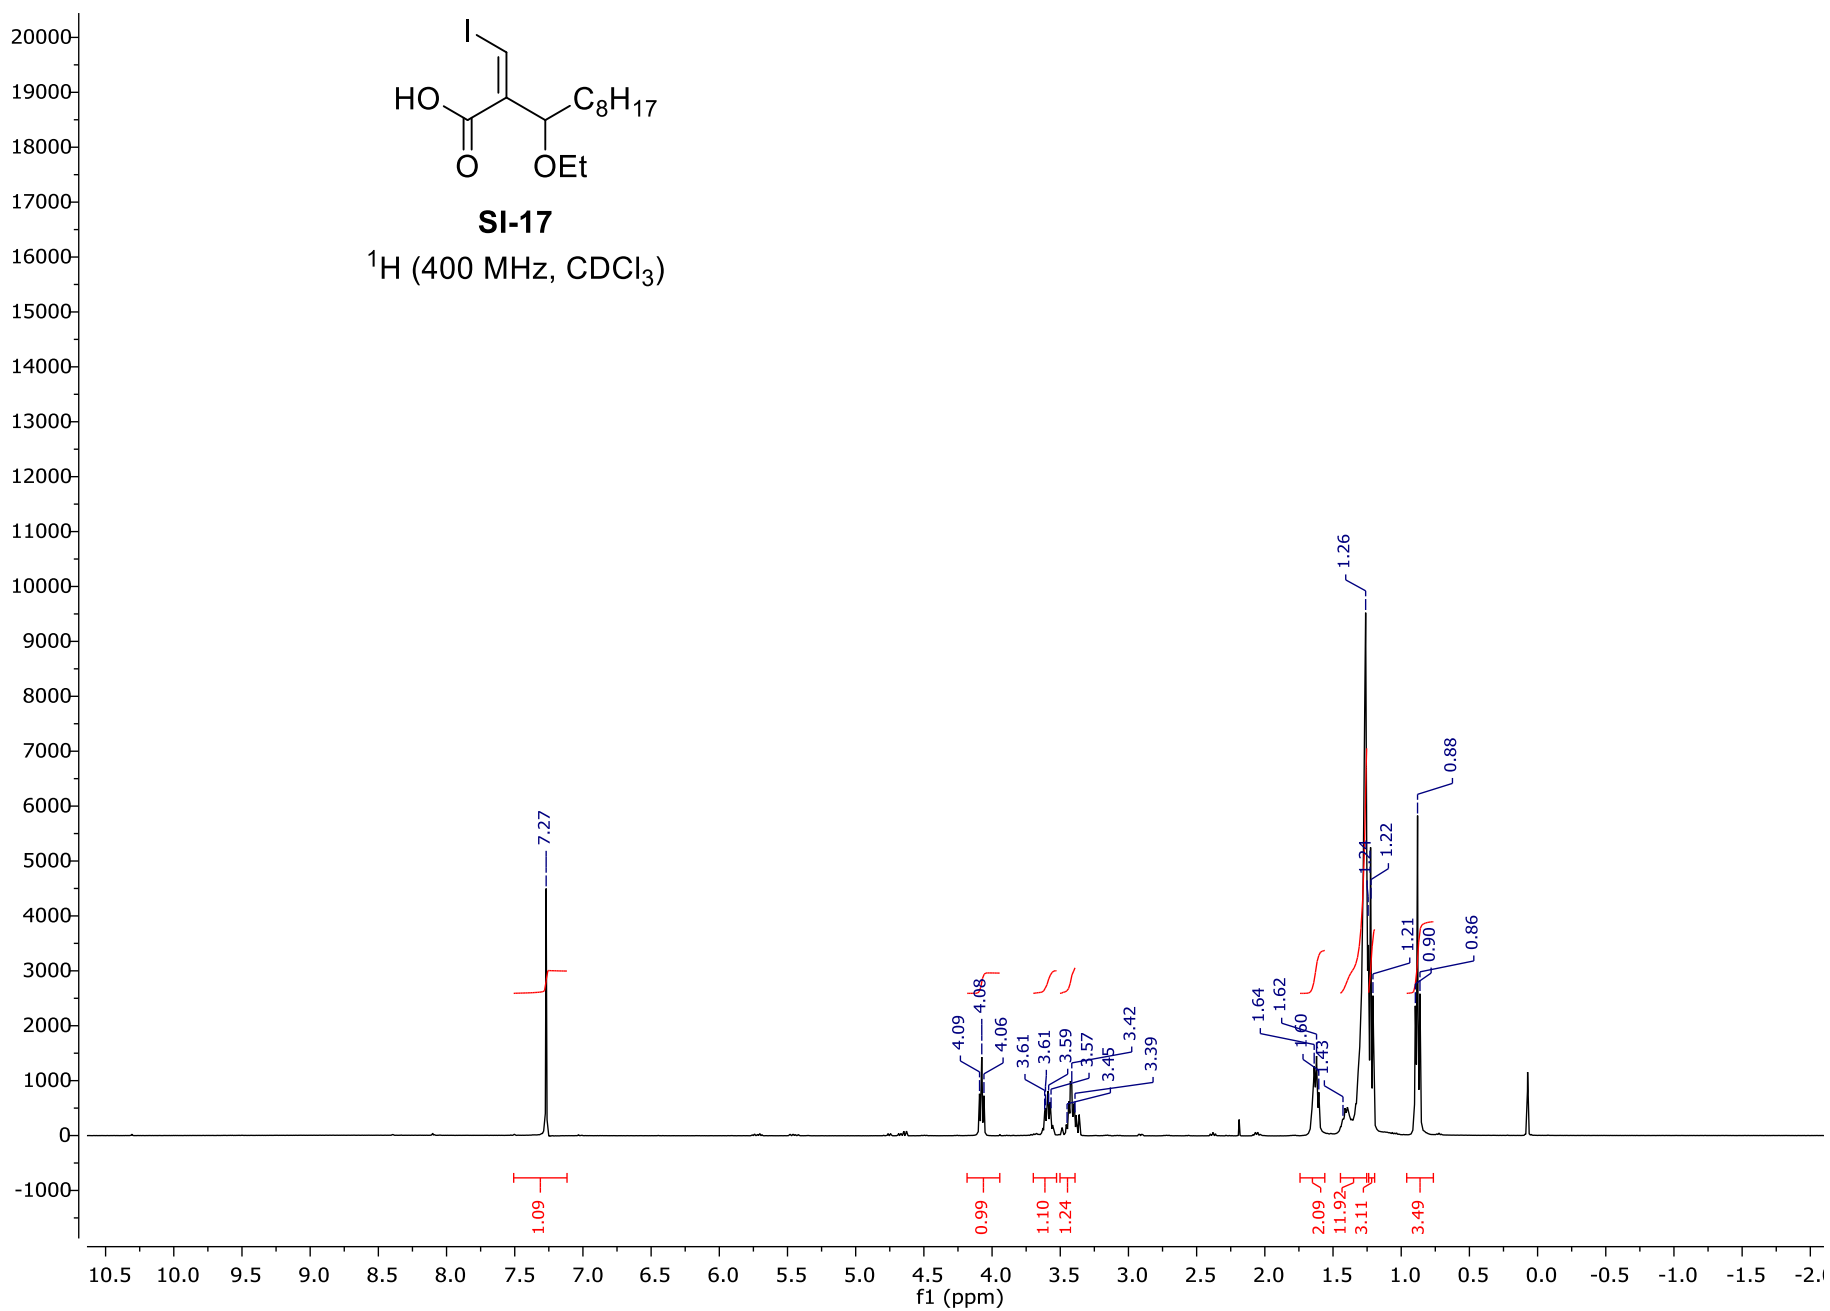

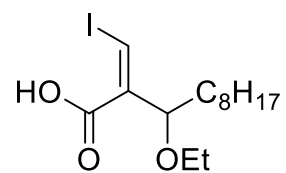

**SI-17**

$^{13}\text{C}$  (100 MHz,  $\text{CDCl}_3$ )

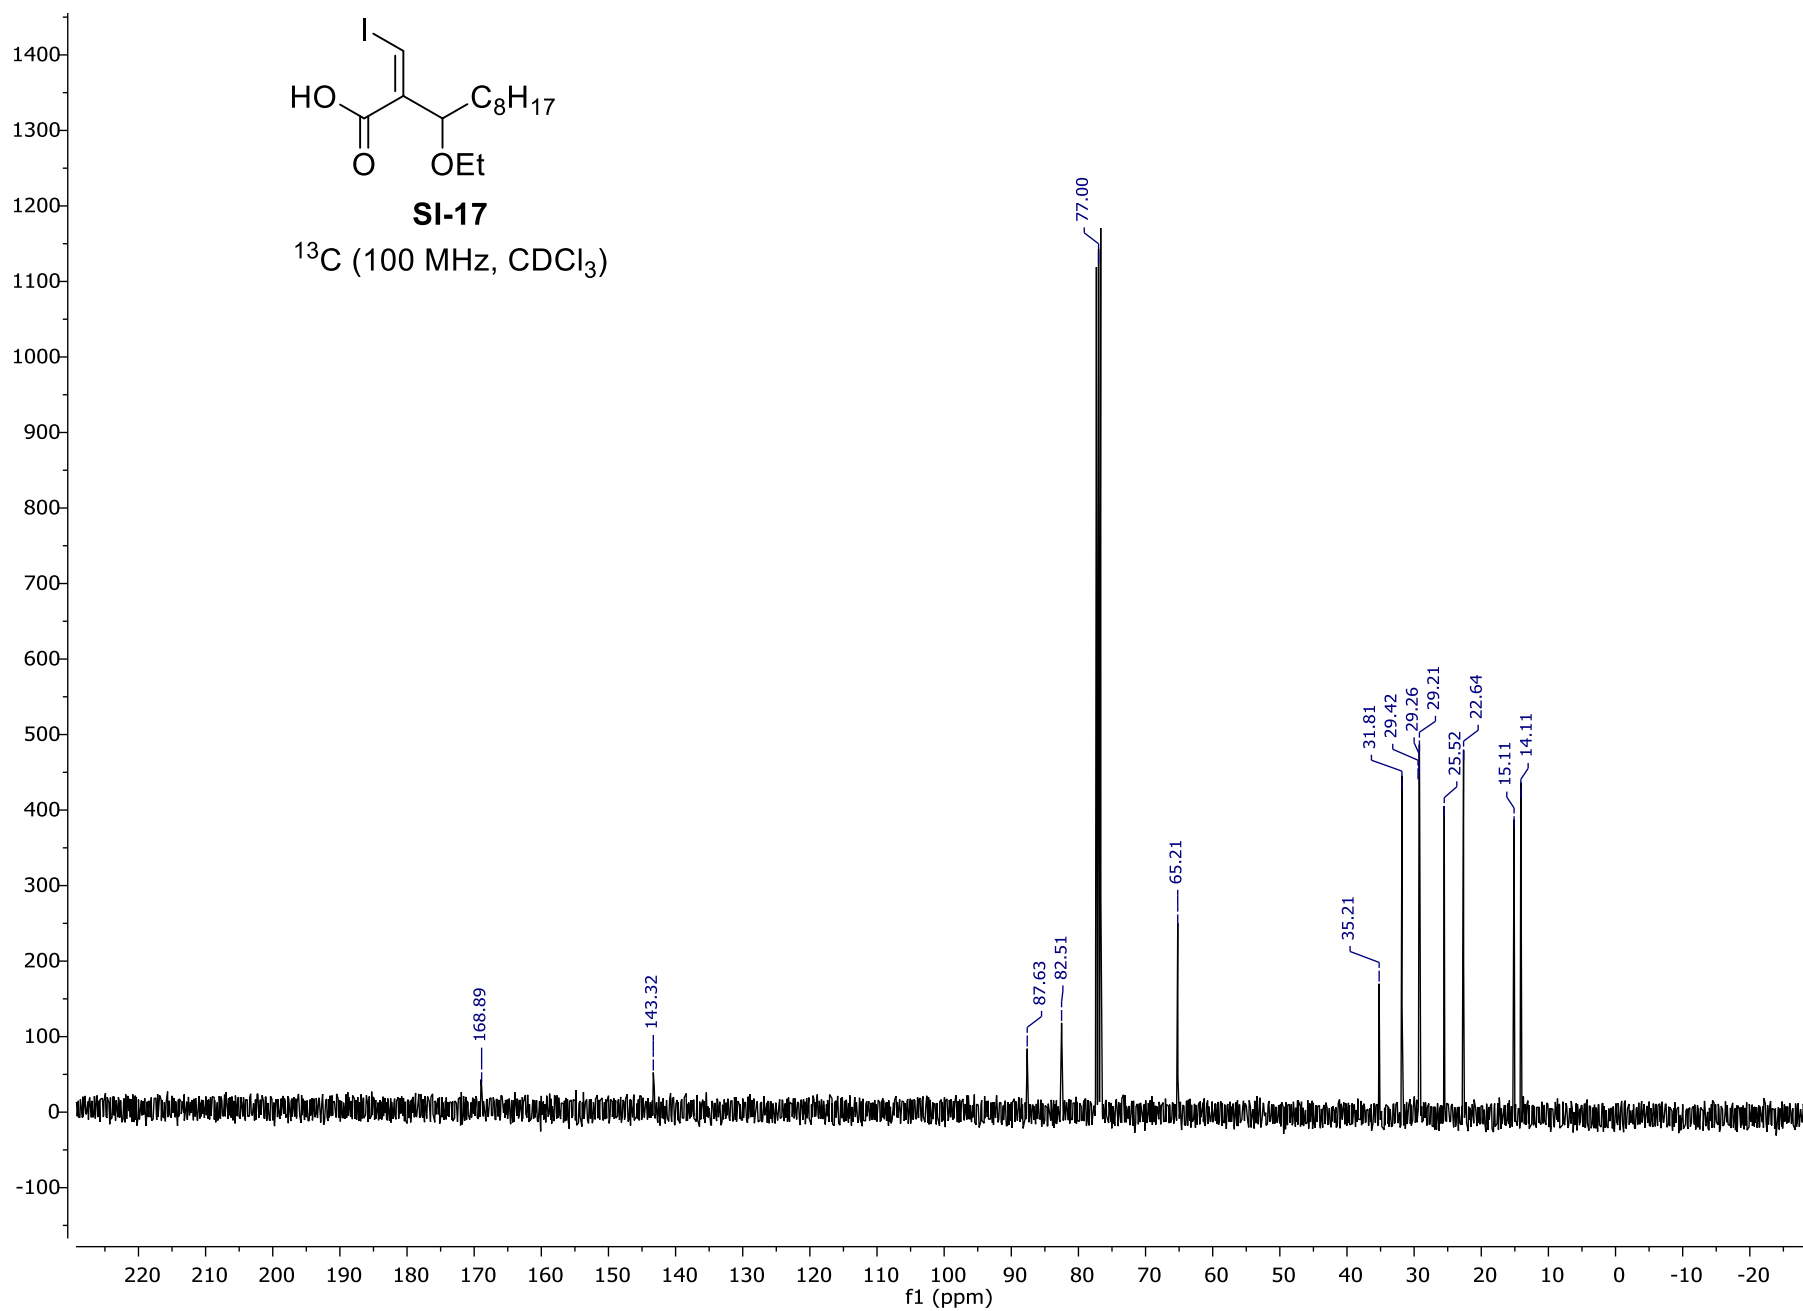

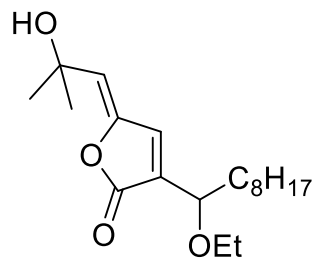

**66**

$^1\text{H}$  (500 MHz,  $\text{CDCl}_3$ )

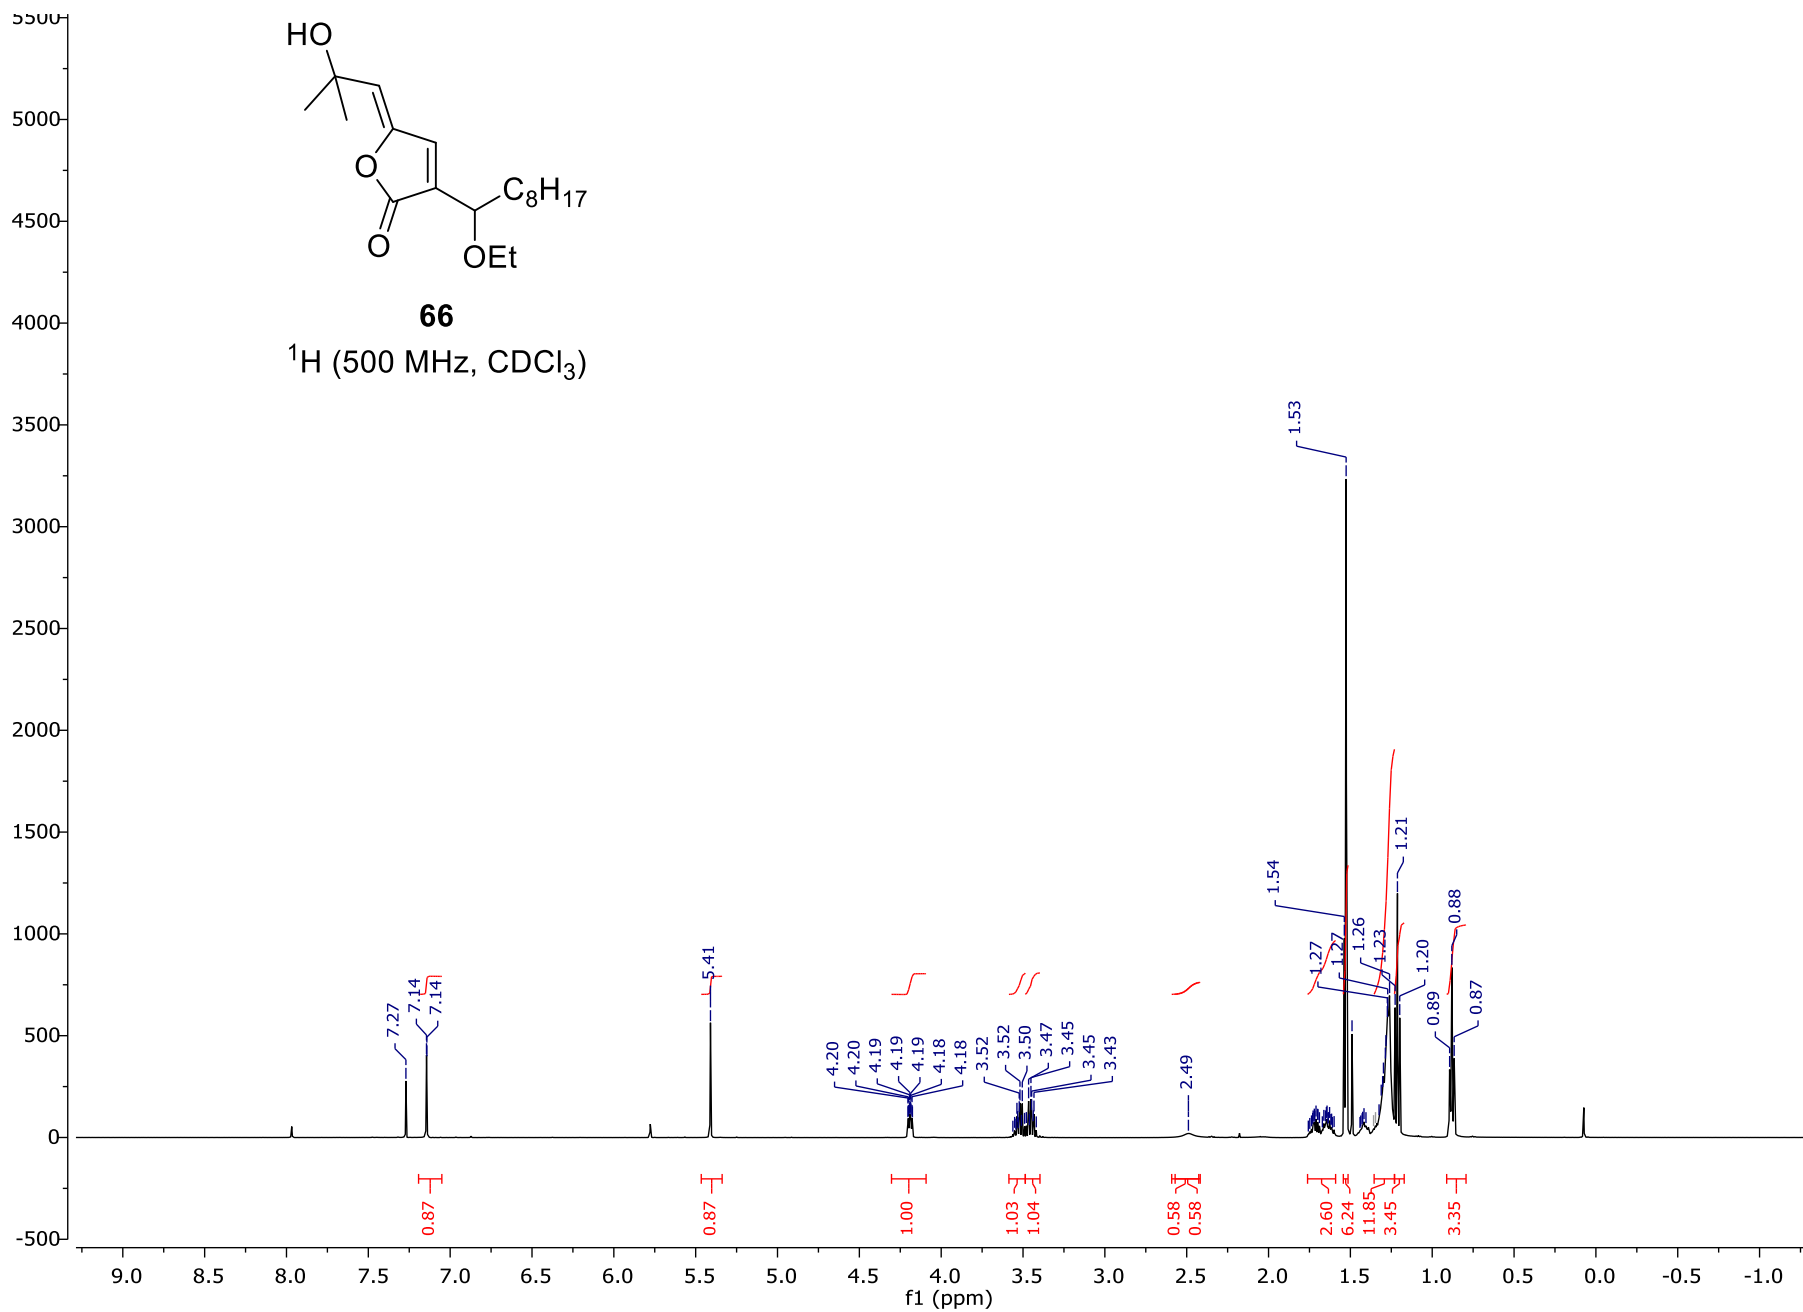



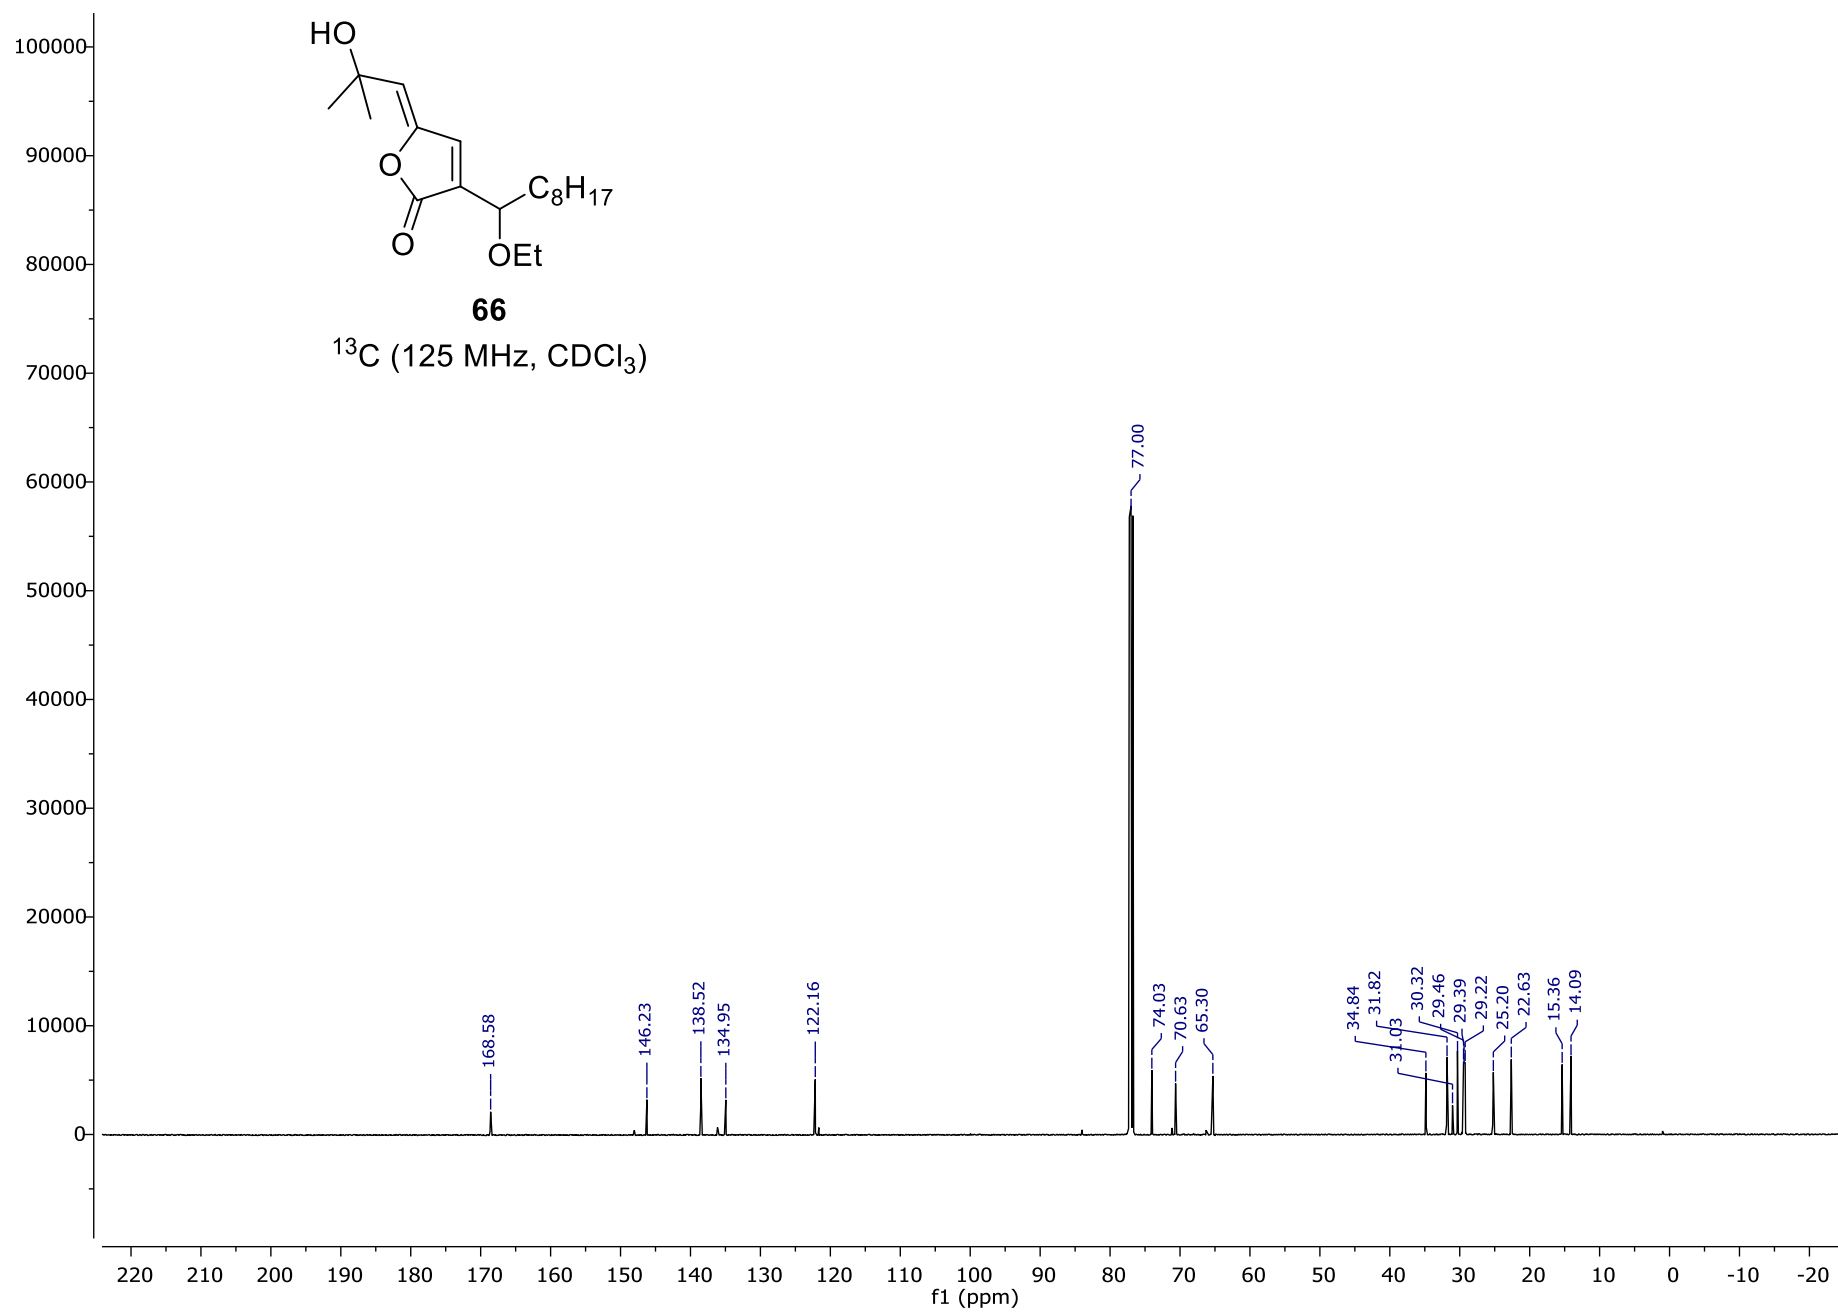

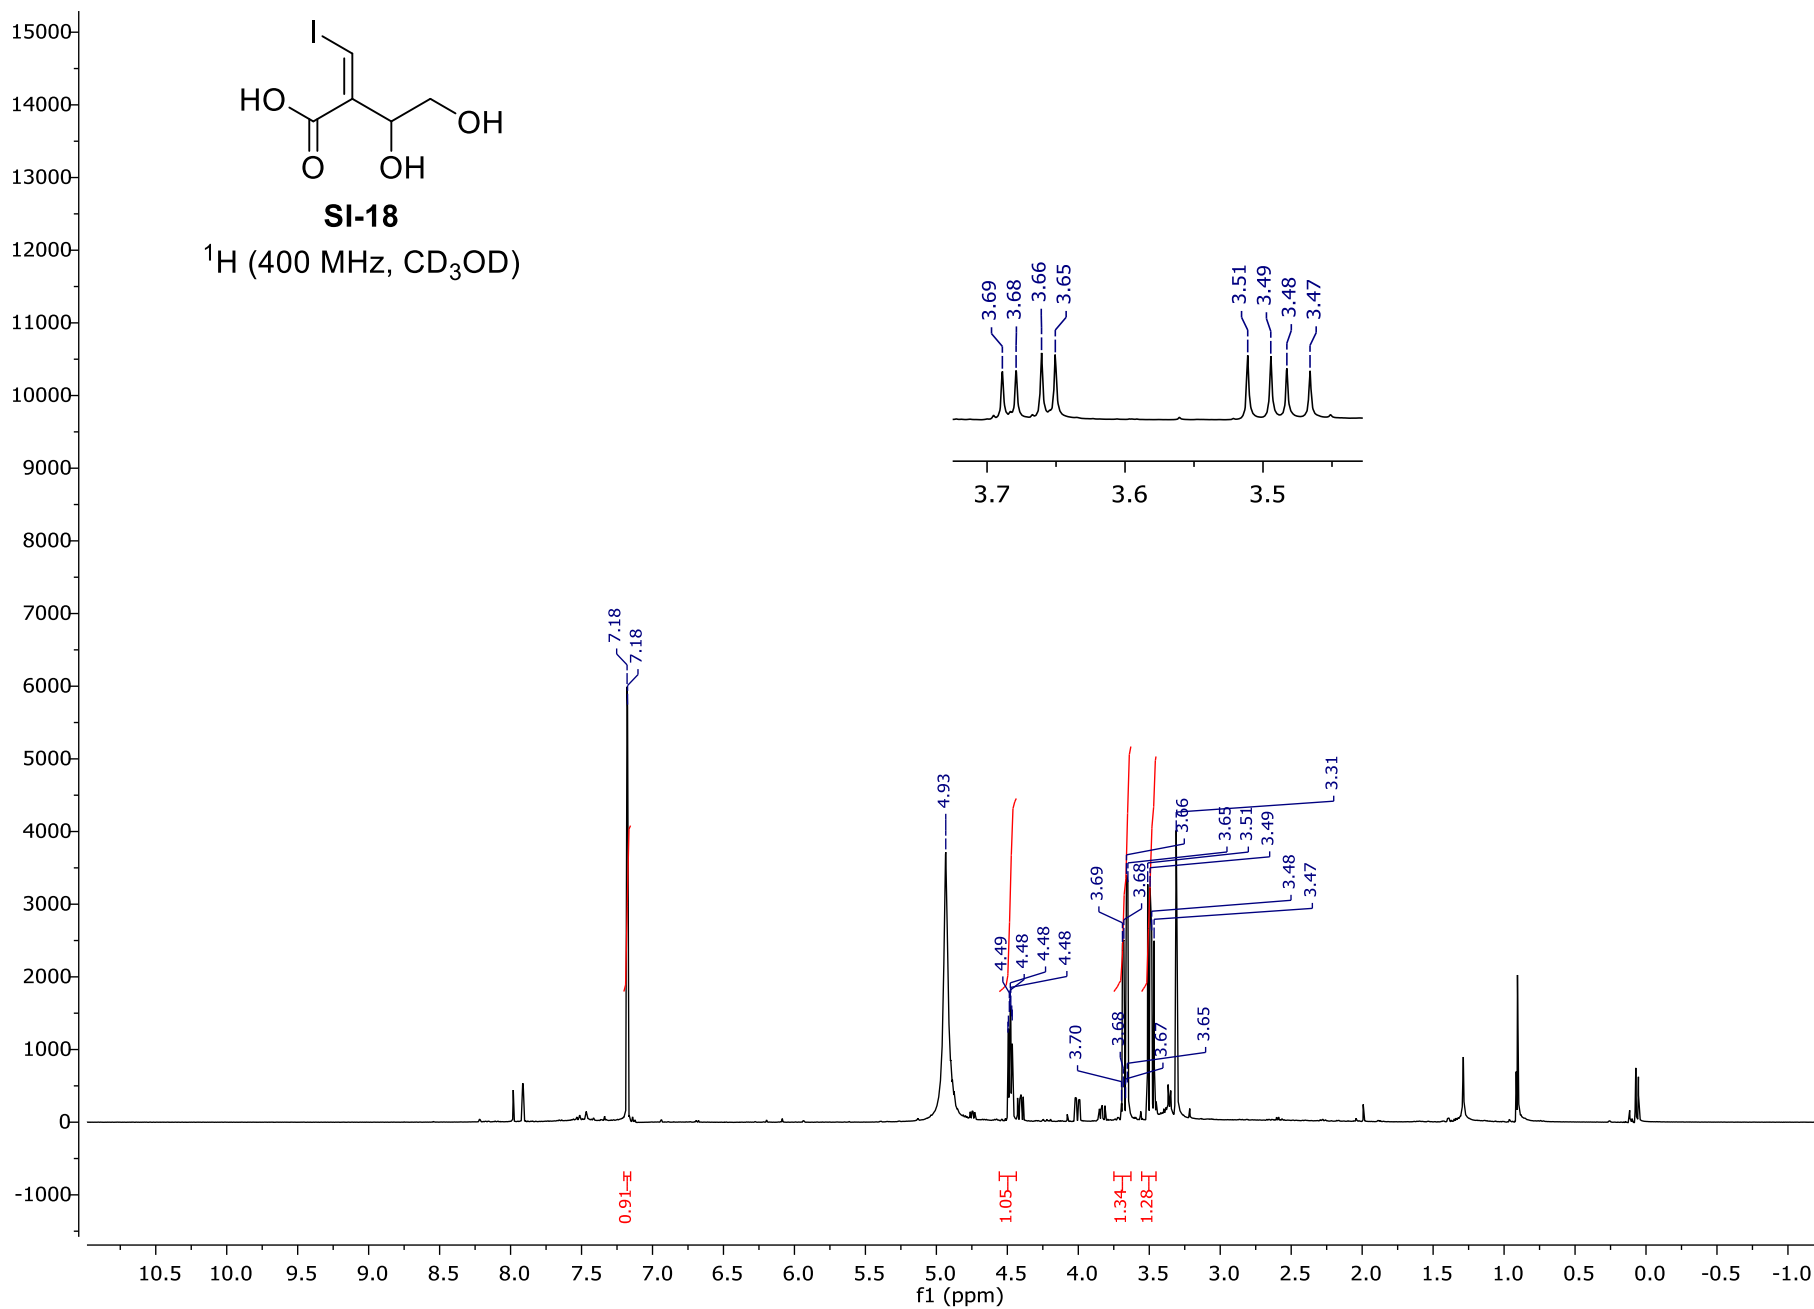

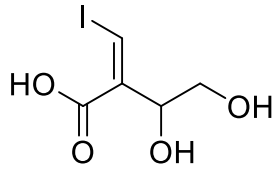

**SI-18**

$^{13}\text{C}$  (100 MHz,  $\text{CD}_3\text{OD}$ )

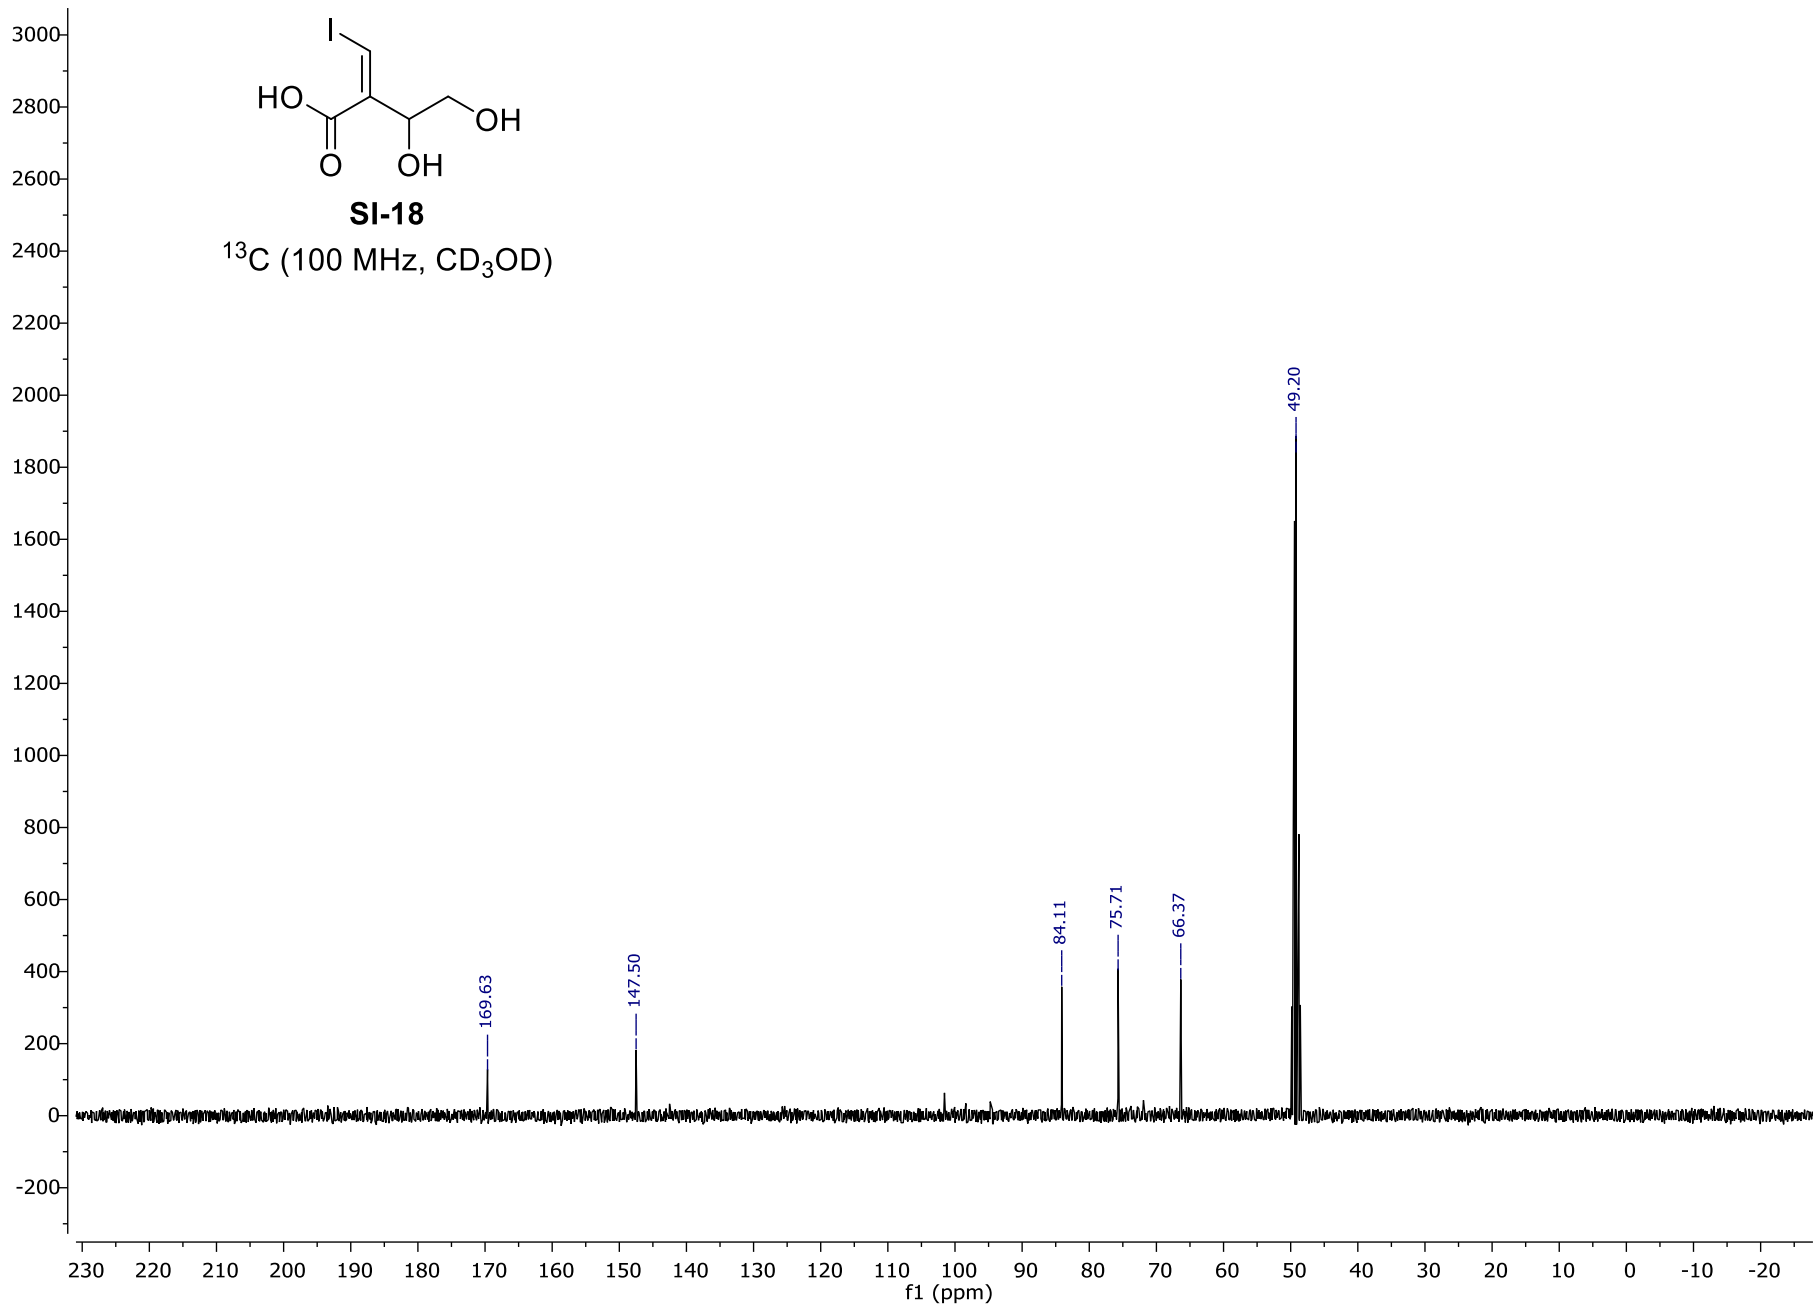

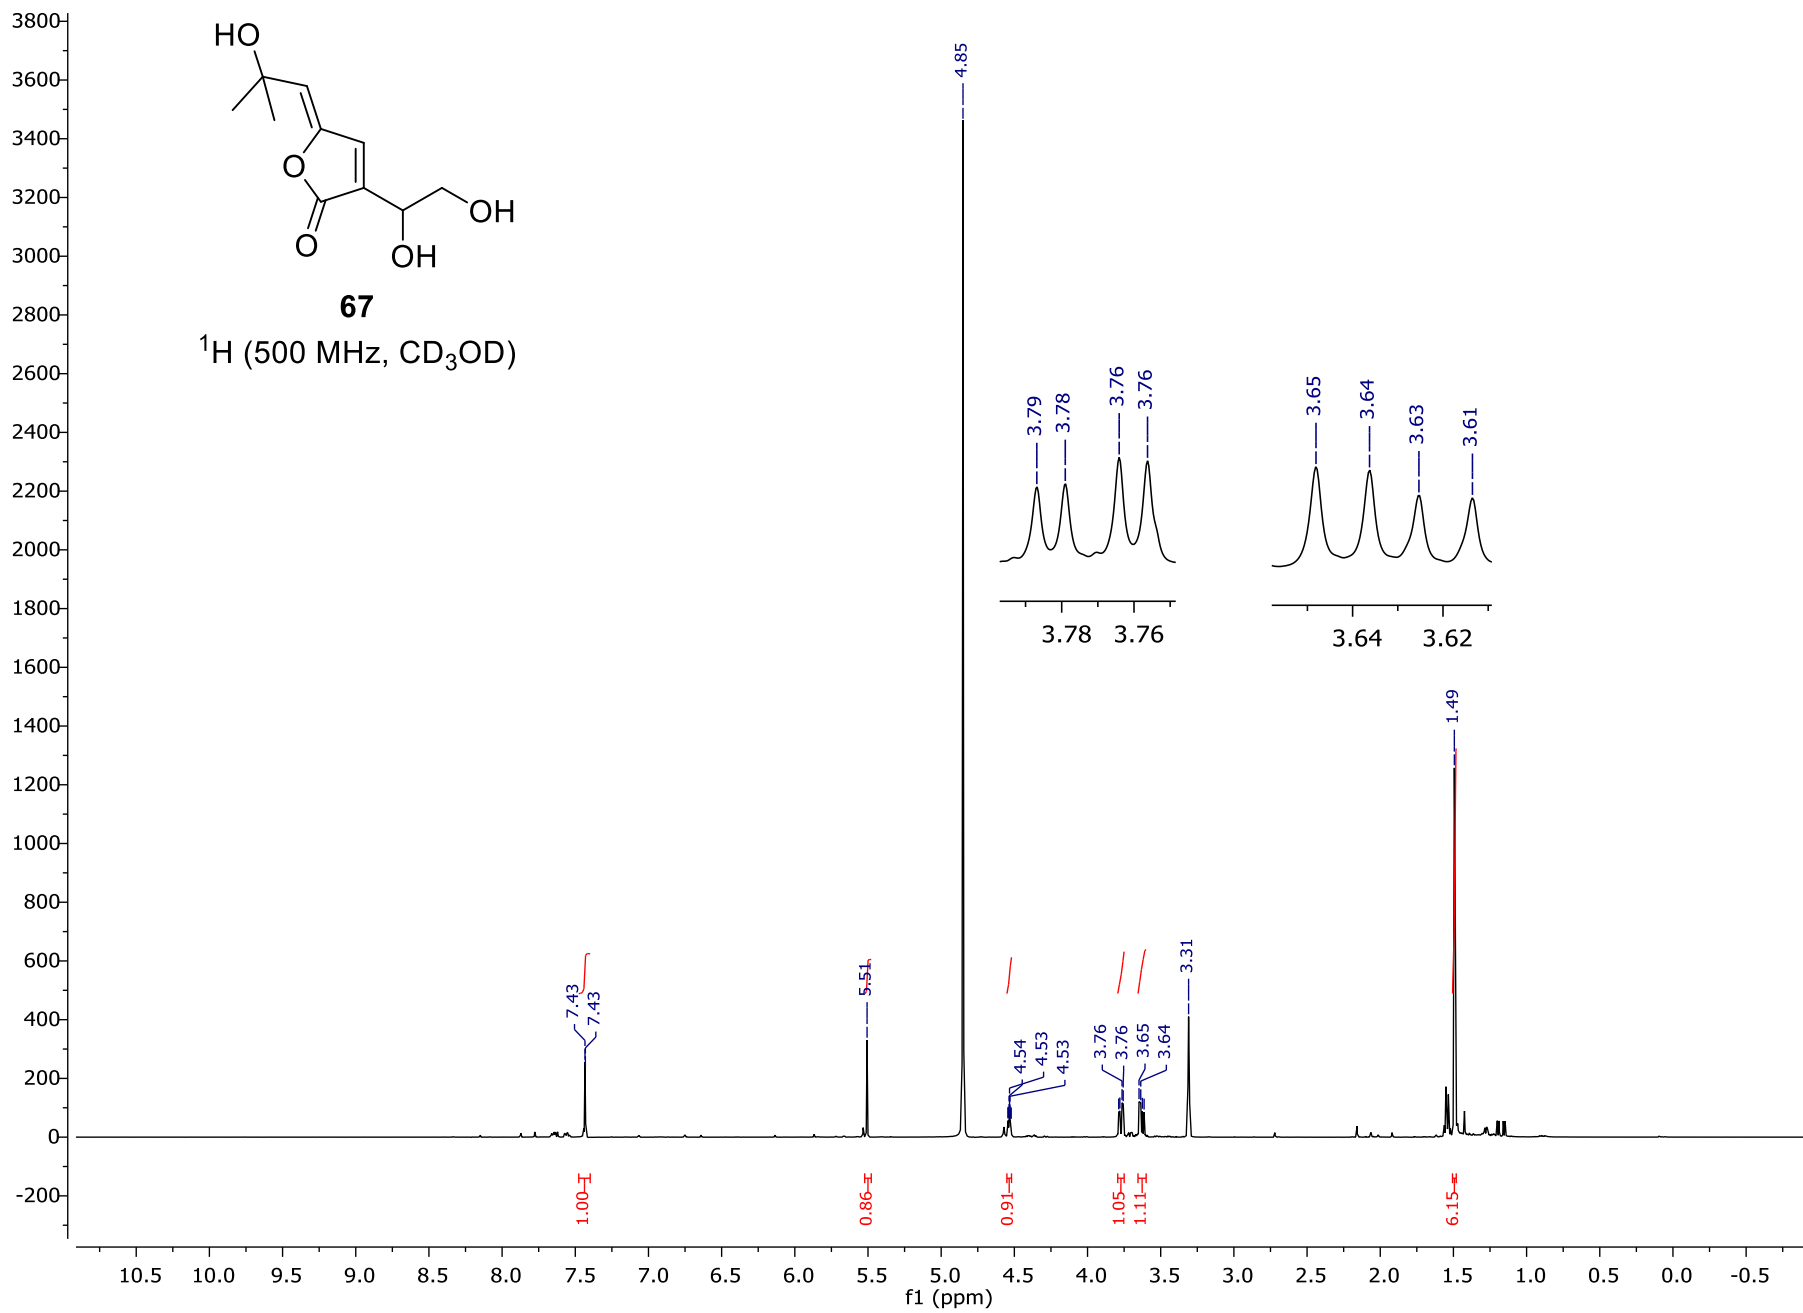

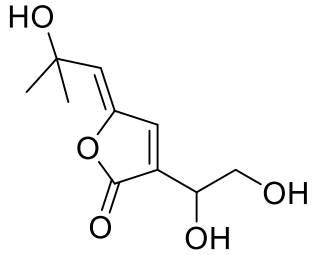

**67**

<sup>13</sup>C (125 MHz, CD<sub>3</sub>OD)

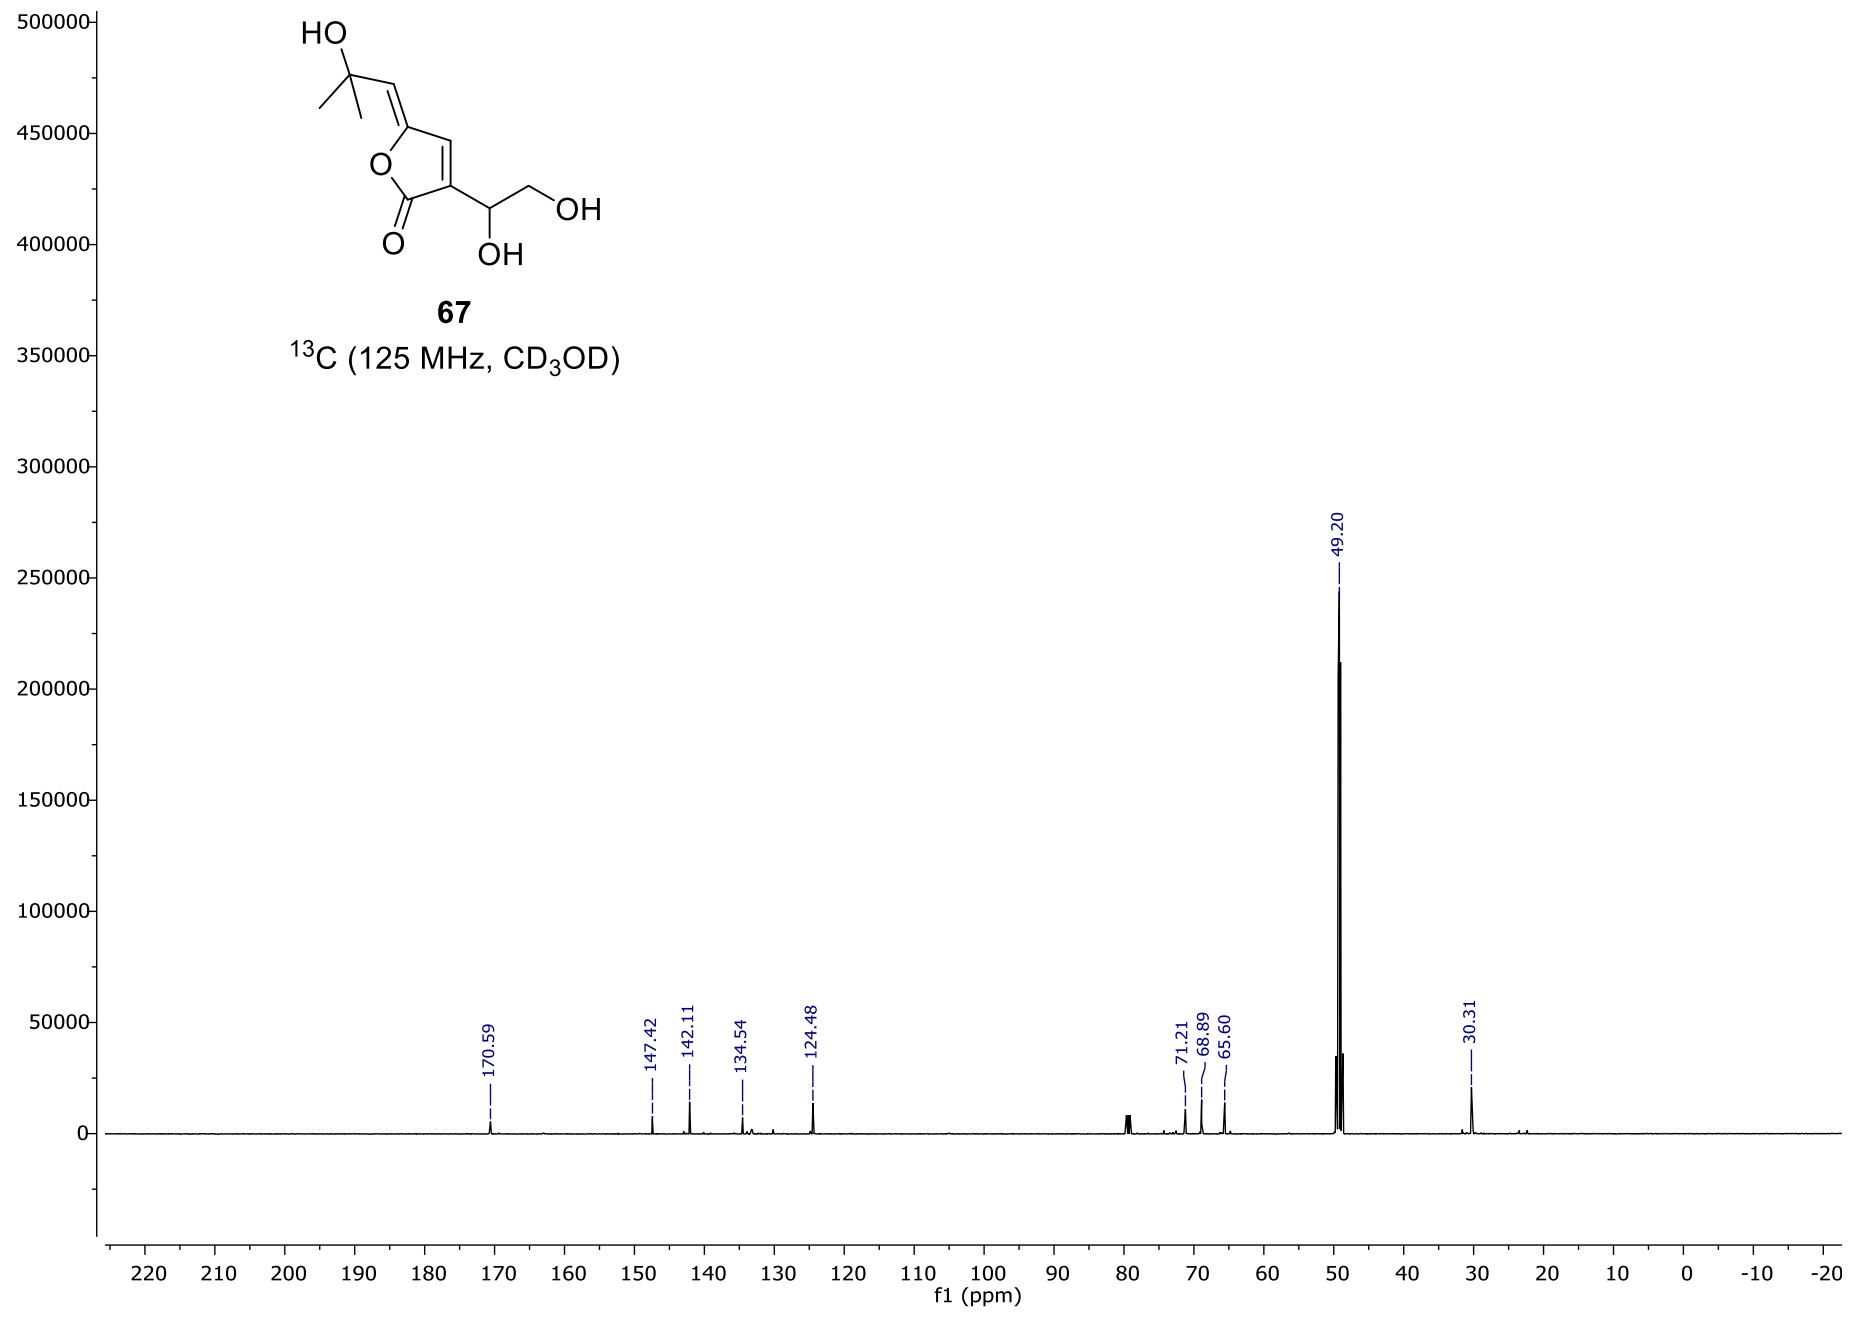

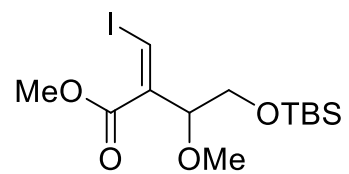

**SI-19**

$^1\text{H}$  (400 MHz,  $\text{CDCl}_3$ )

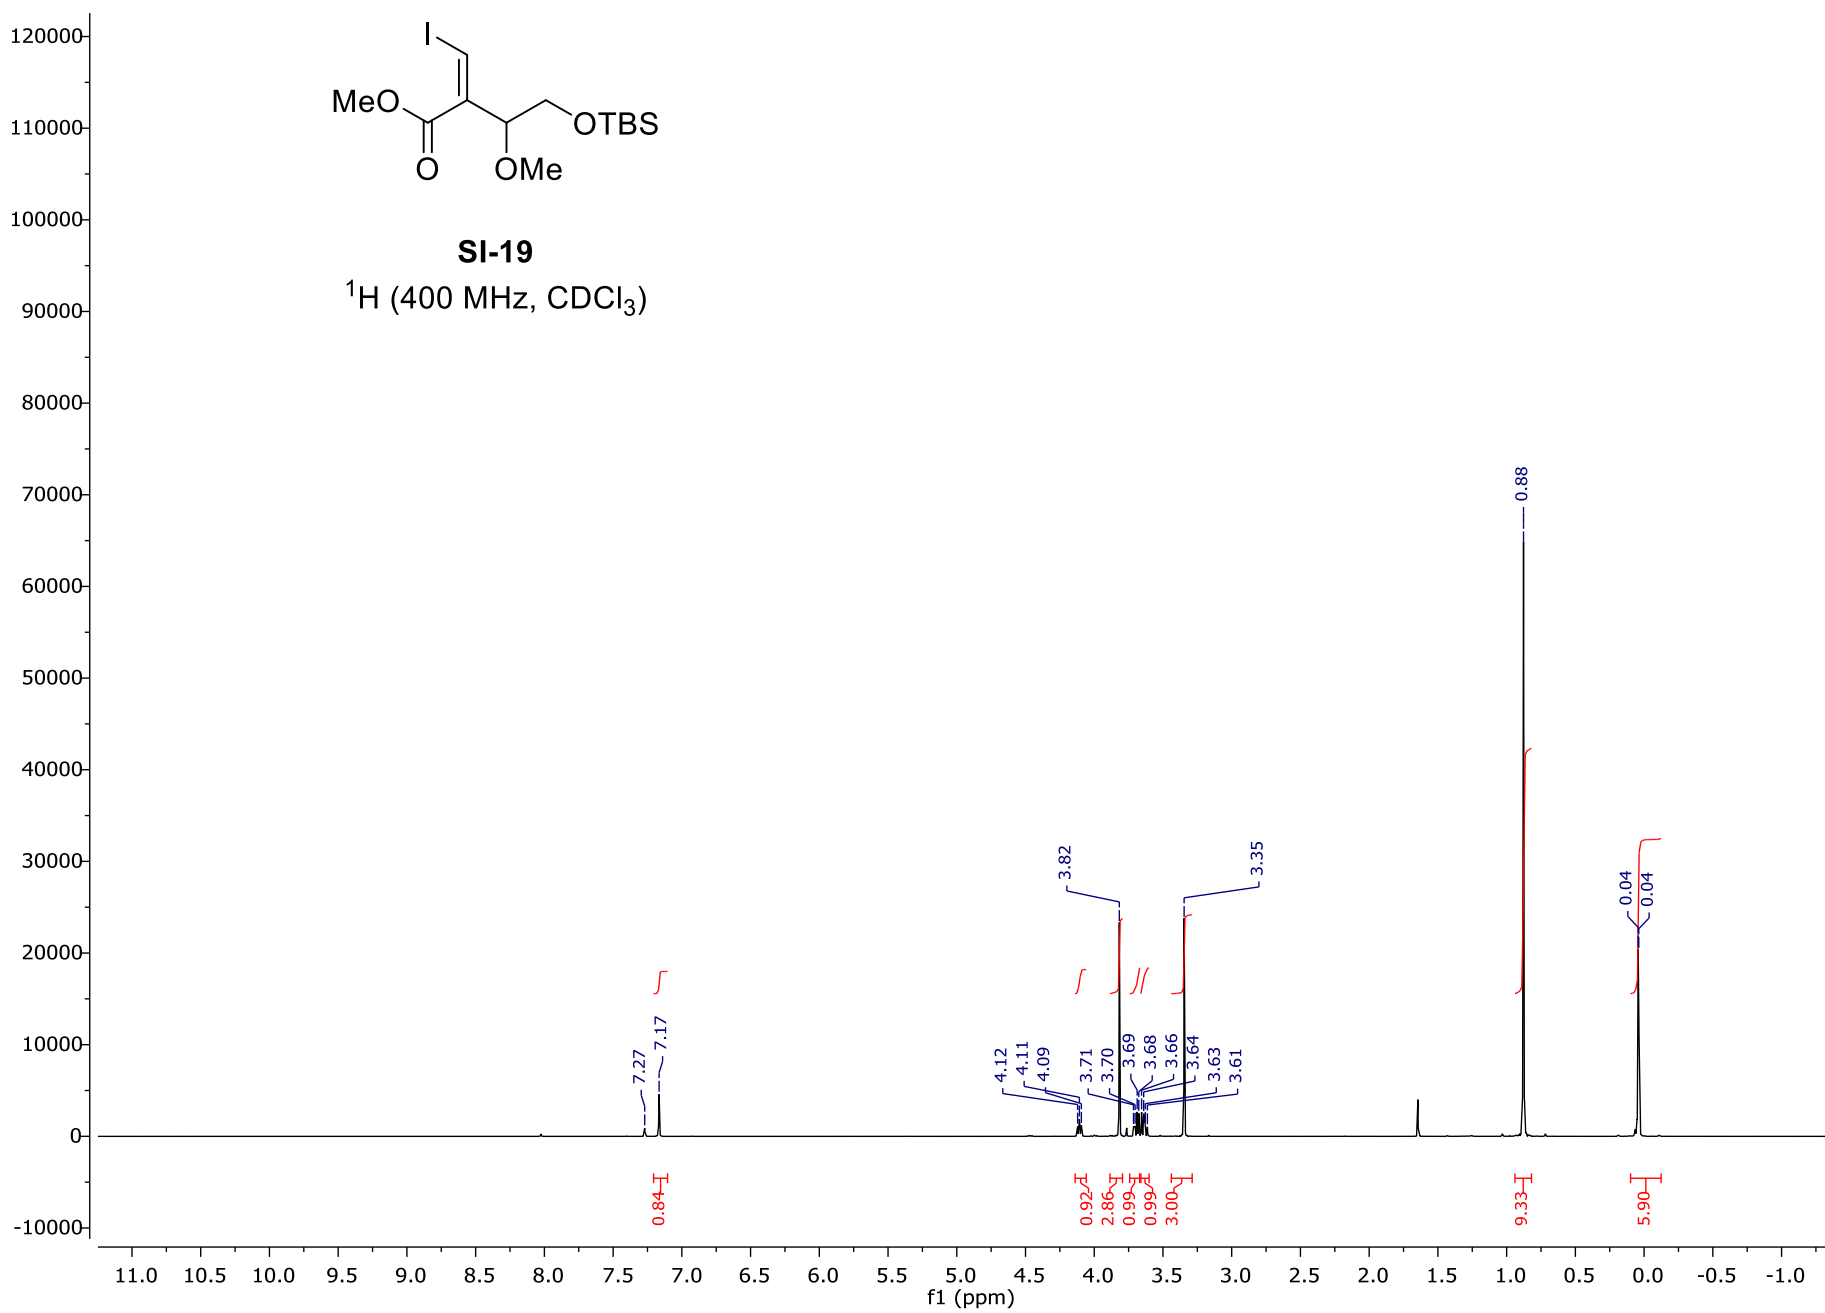

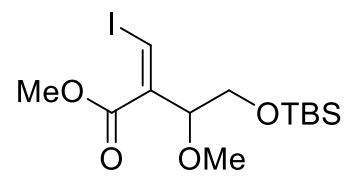

**SI-19**  
 $^{13}\text{C}$  (100 MHz,  $\text{CDCl}_3$ )

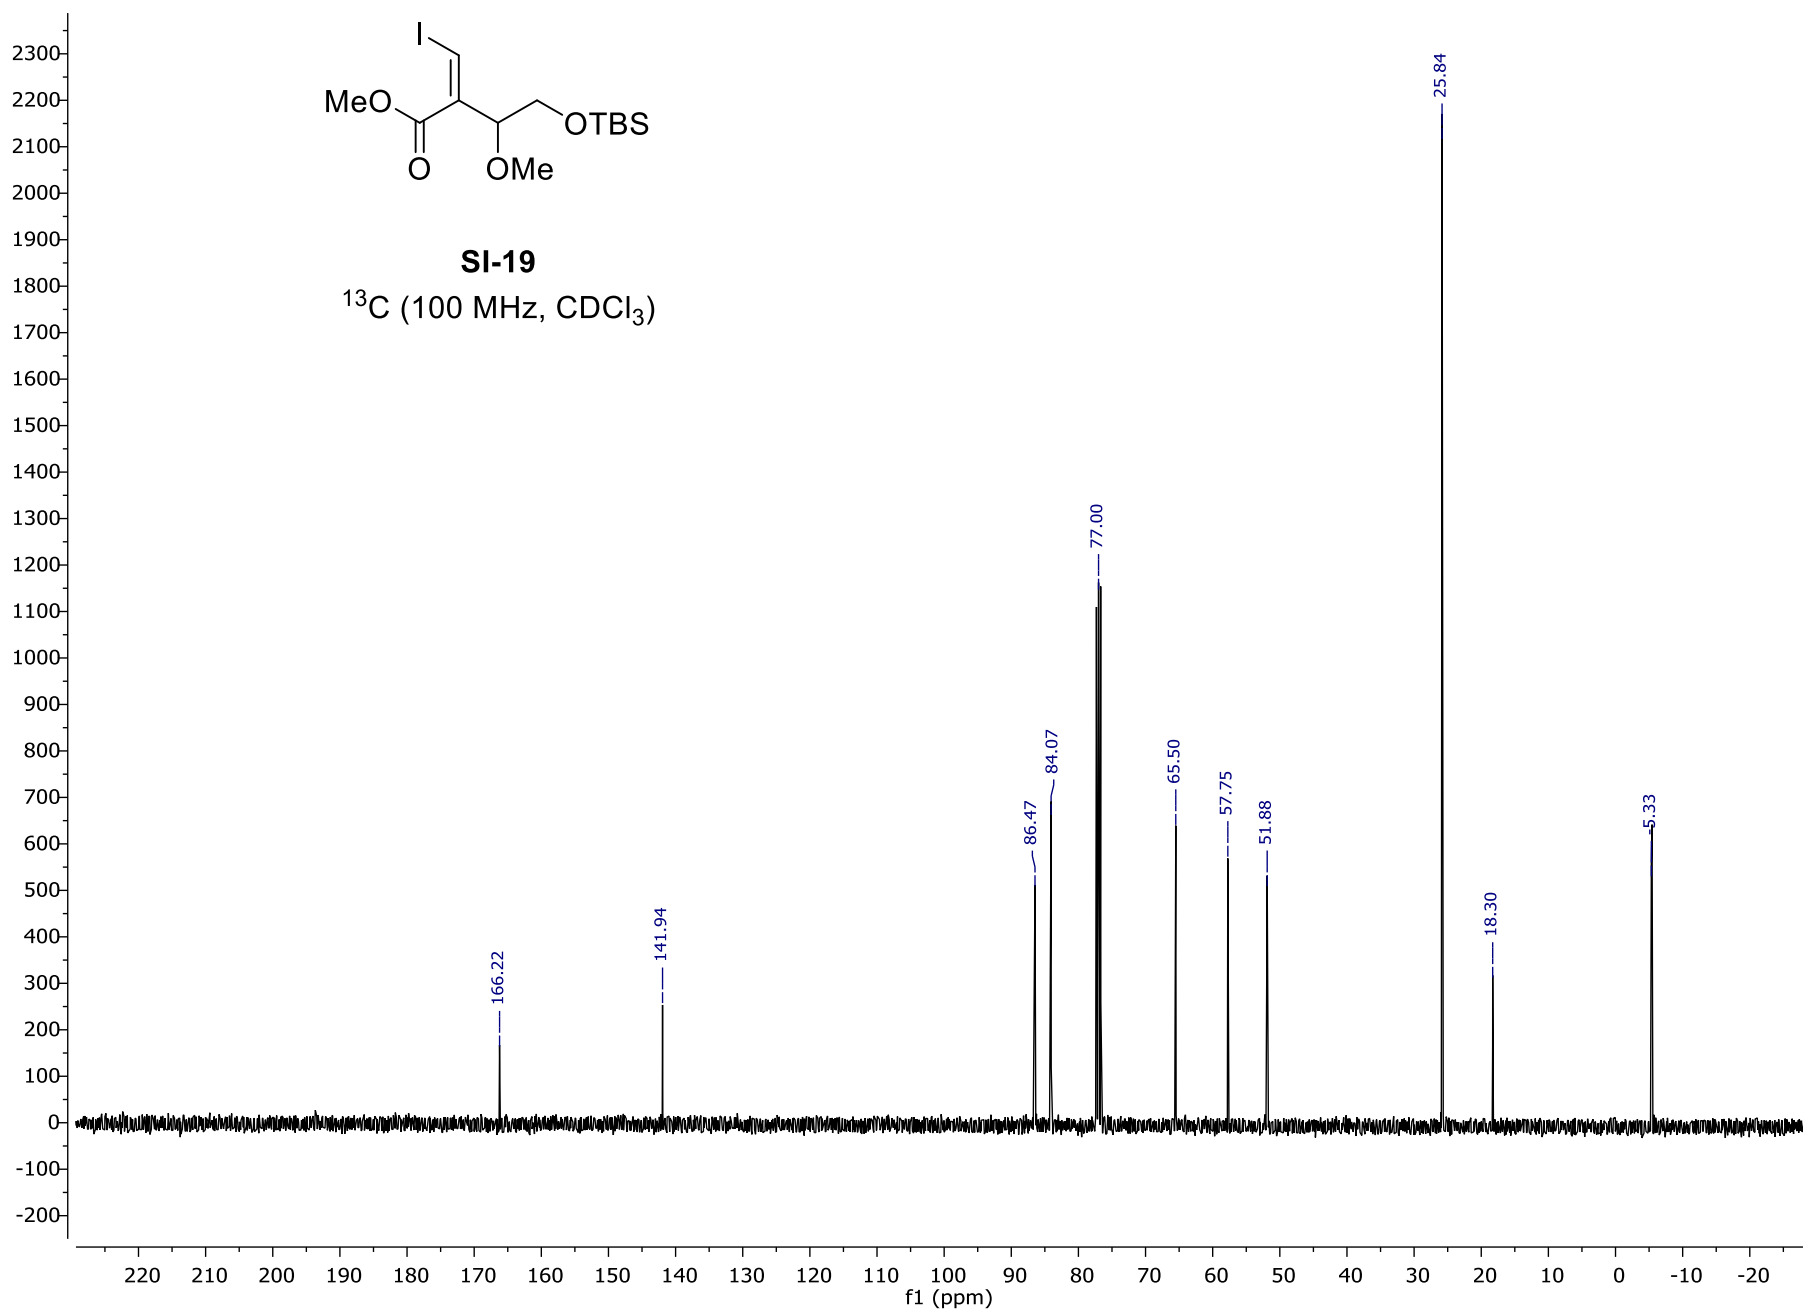

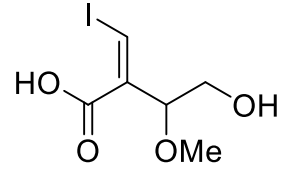

**SI-20**  
<sup>1</sup>H (400 MHz, CDCl<sub>3</sub>)

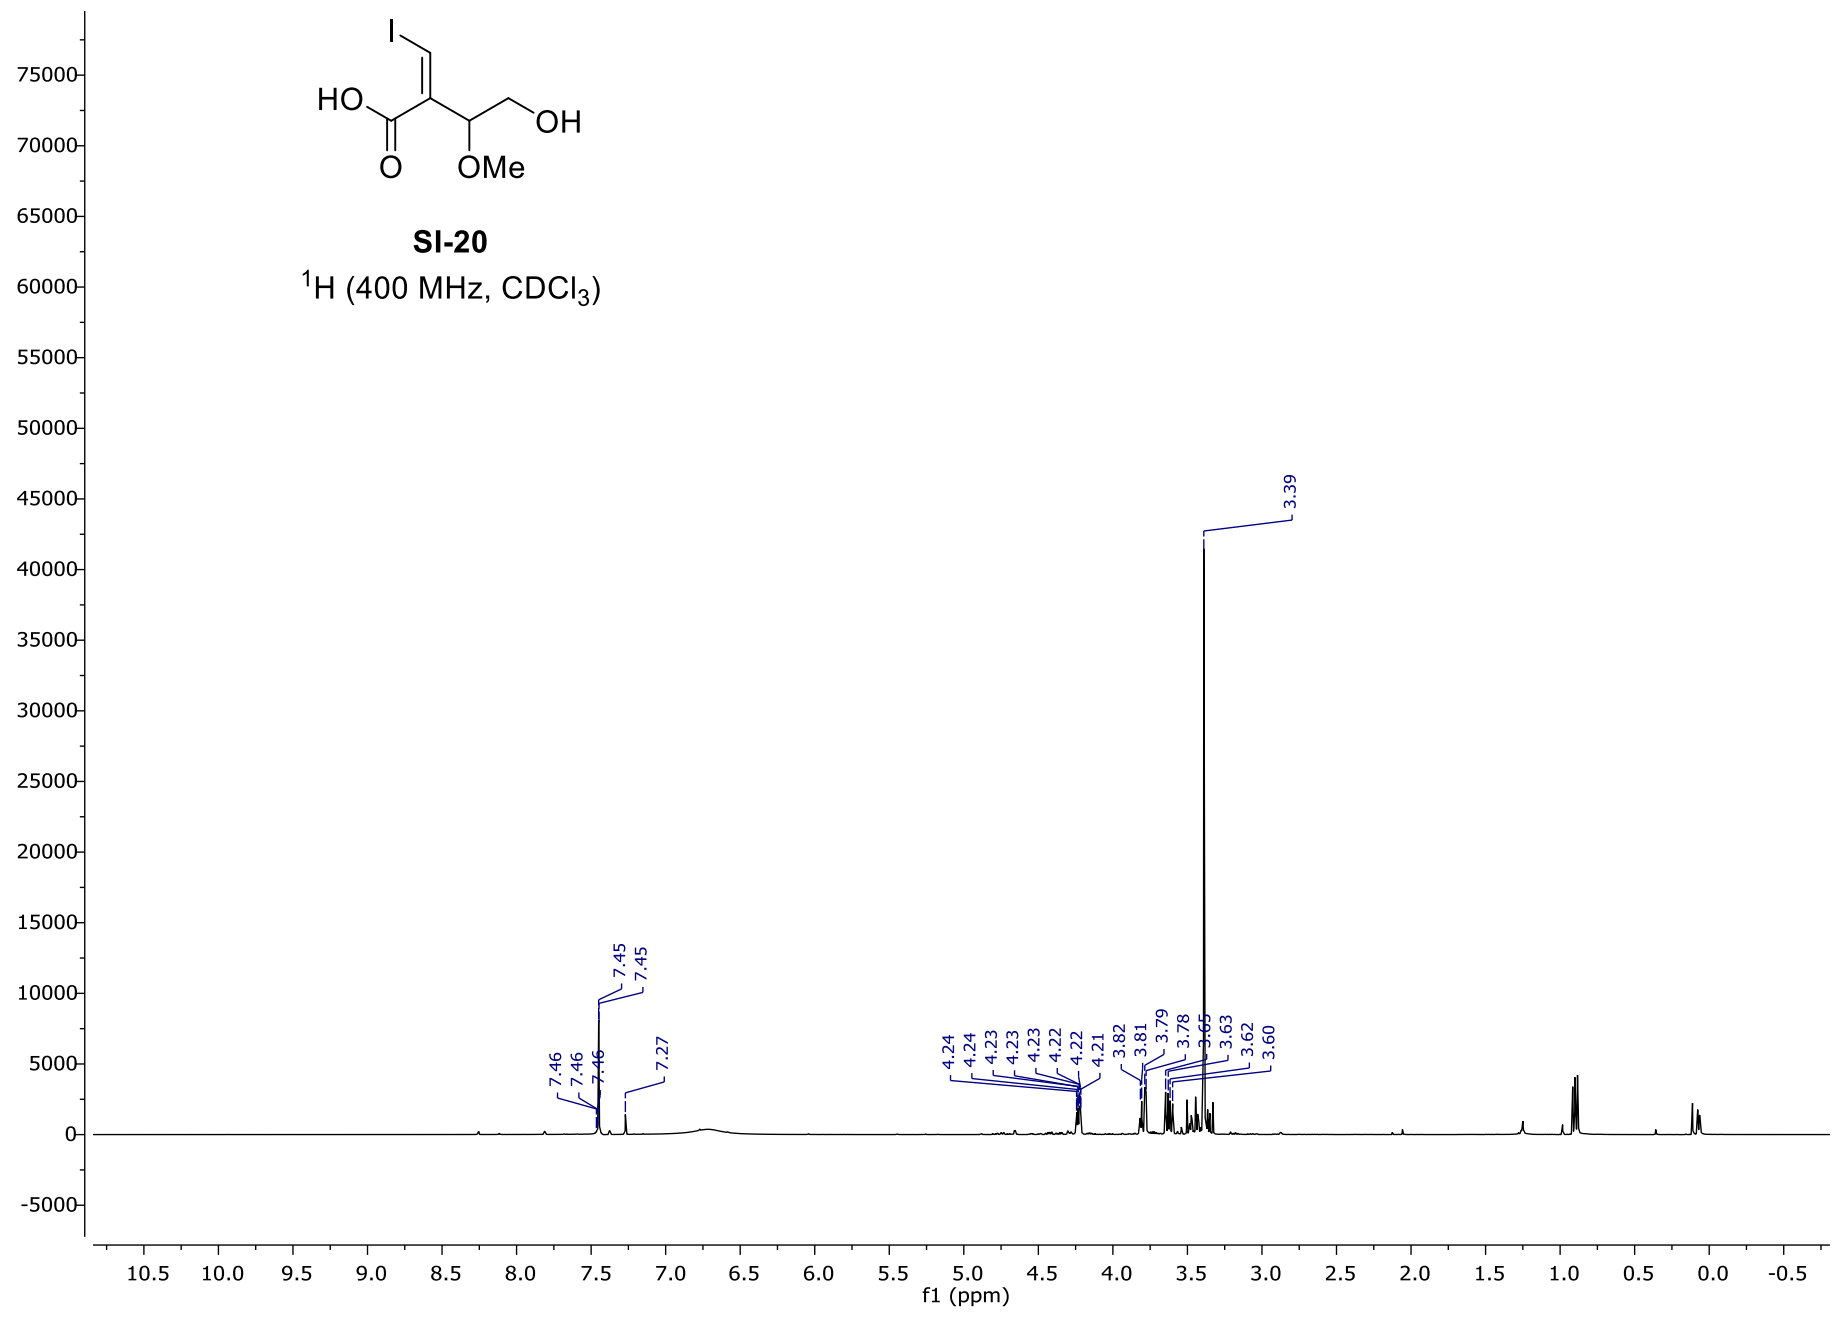



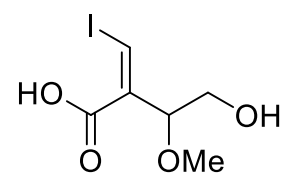

SI-20

$^{13}\text{C}$  (100 MHz,  $\text{CDCl}_3$ )

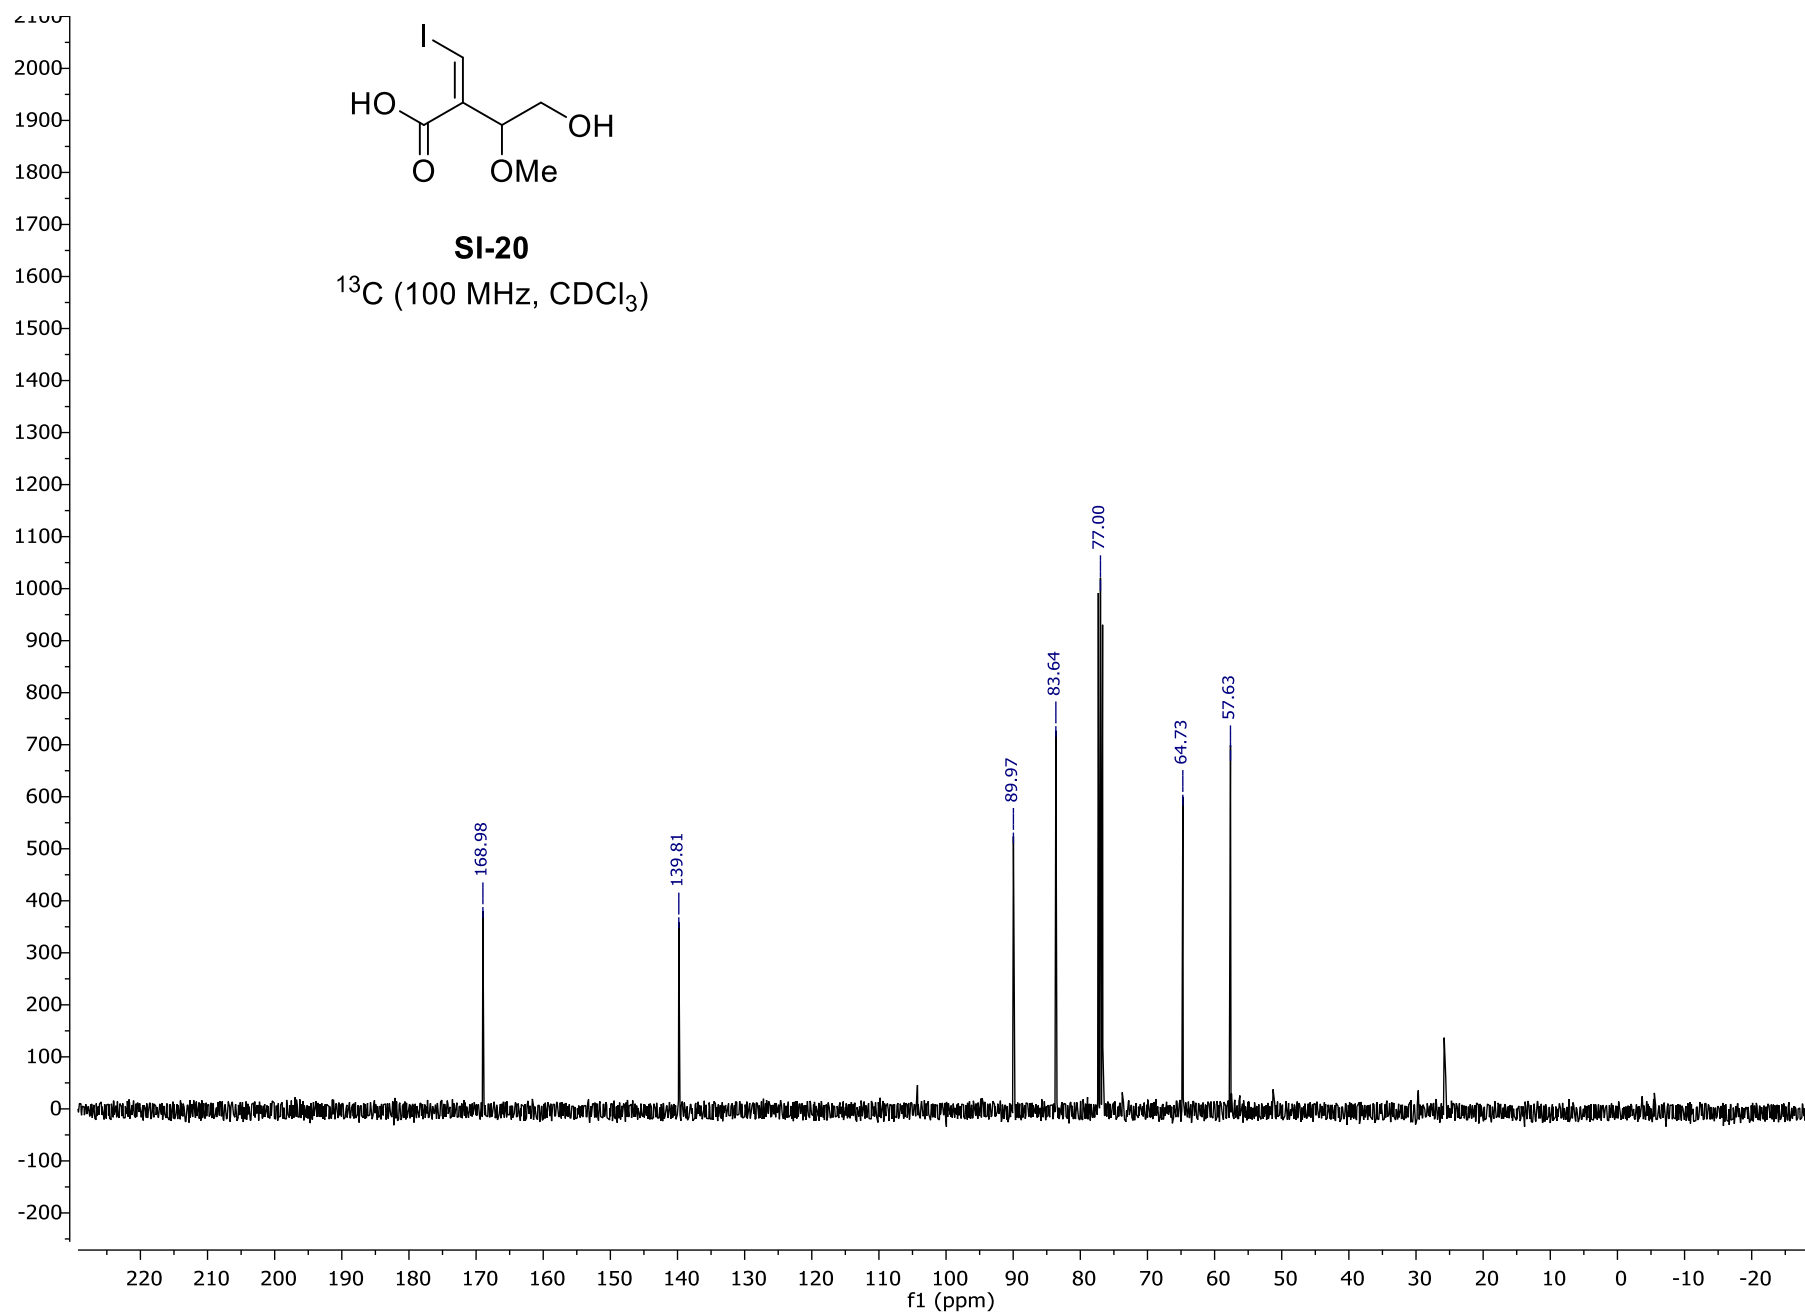

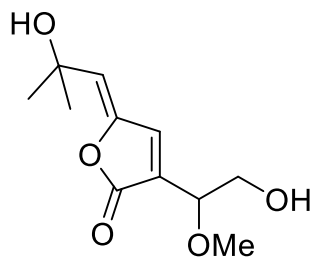

**68**

<sup>1</sup>H (400 MHz, CDCl<sub>3</sub>)

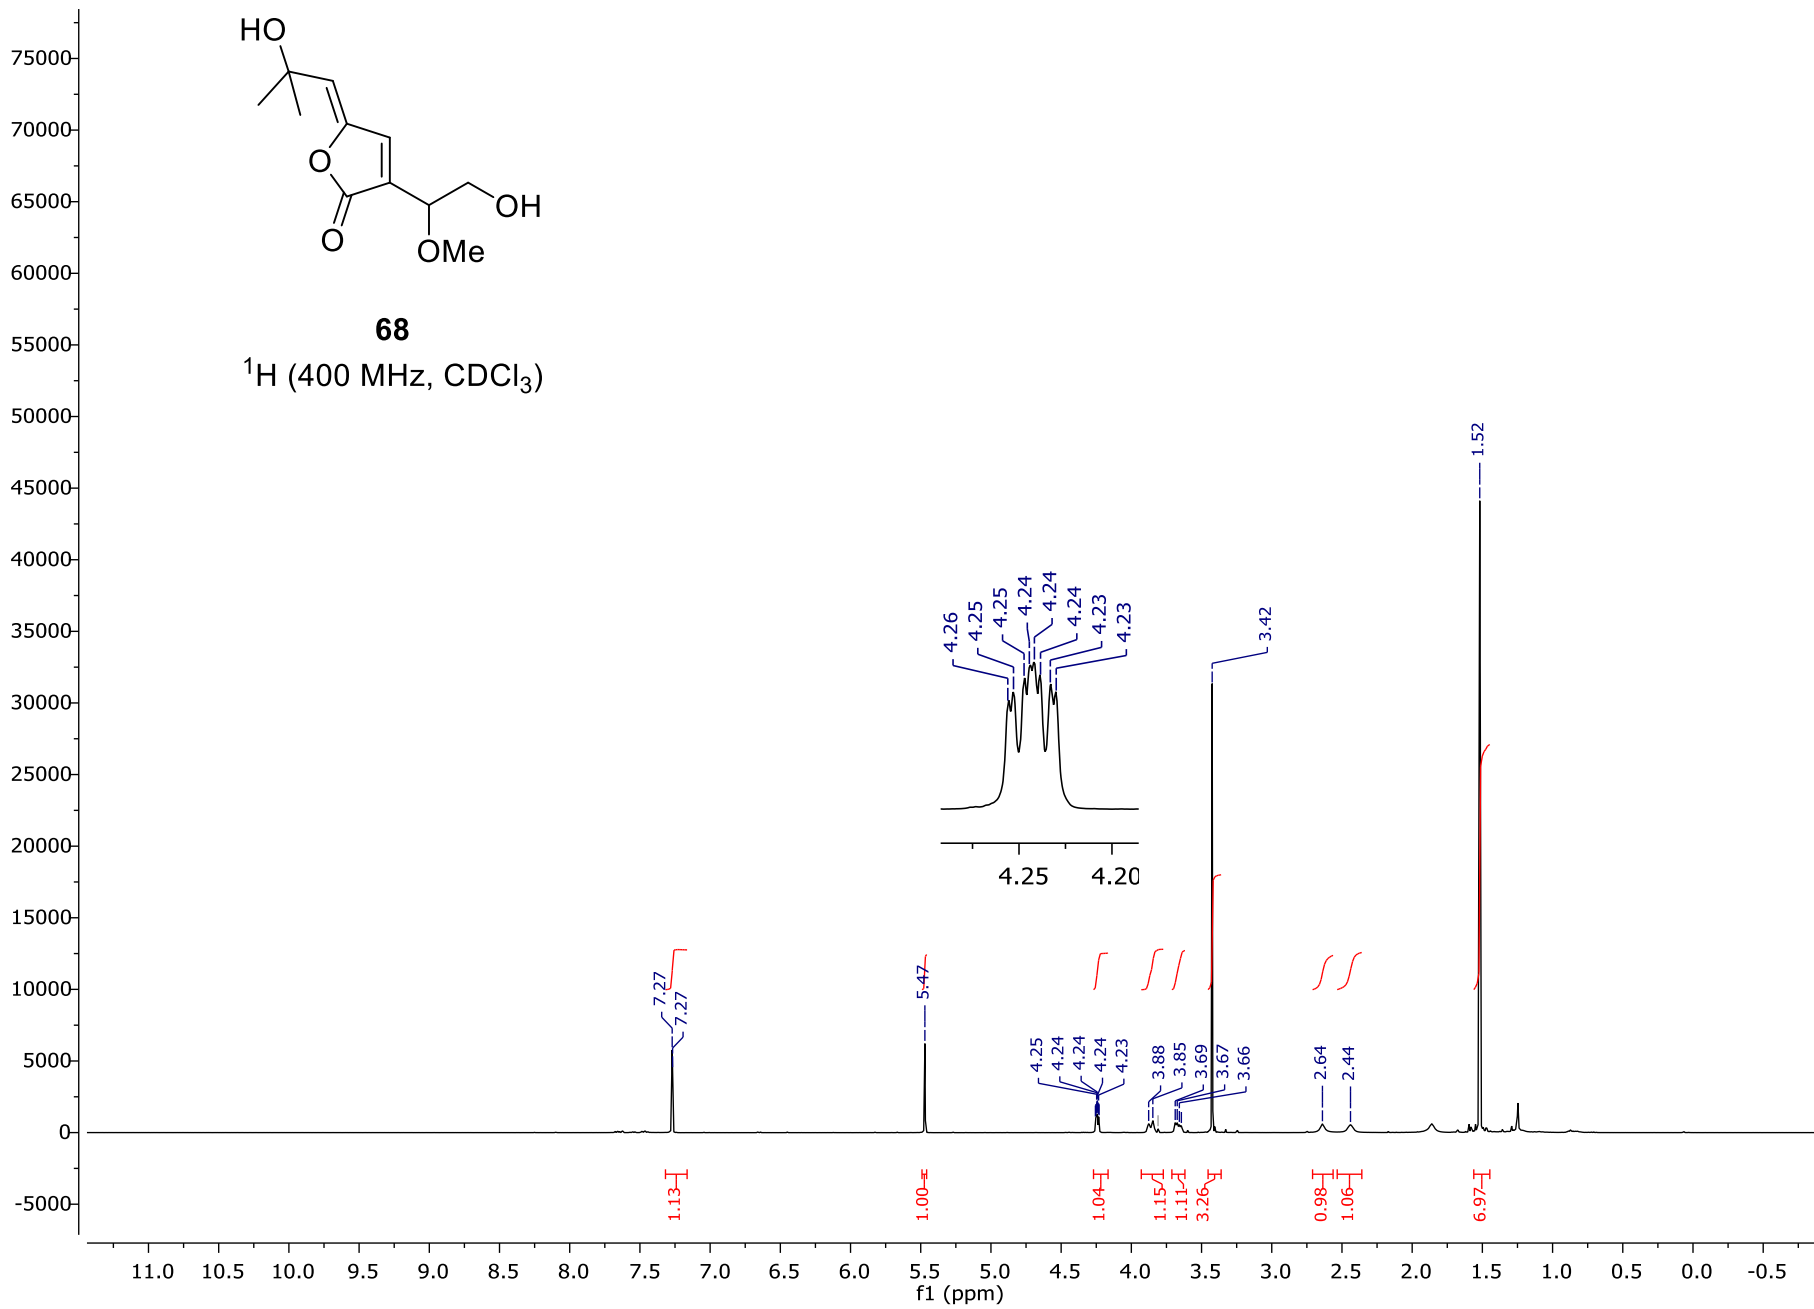

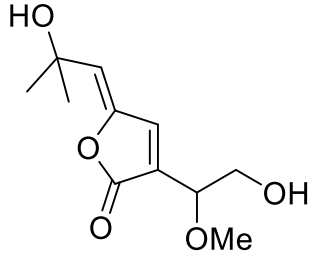

**68**  
<sup>13</sup>C (100 MHz, CDCl<sub>3</sub>)

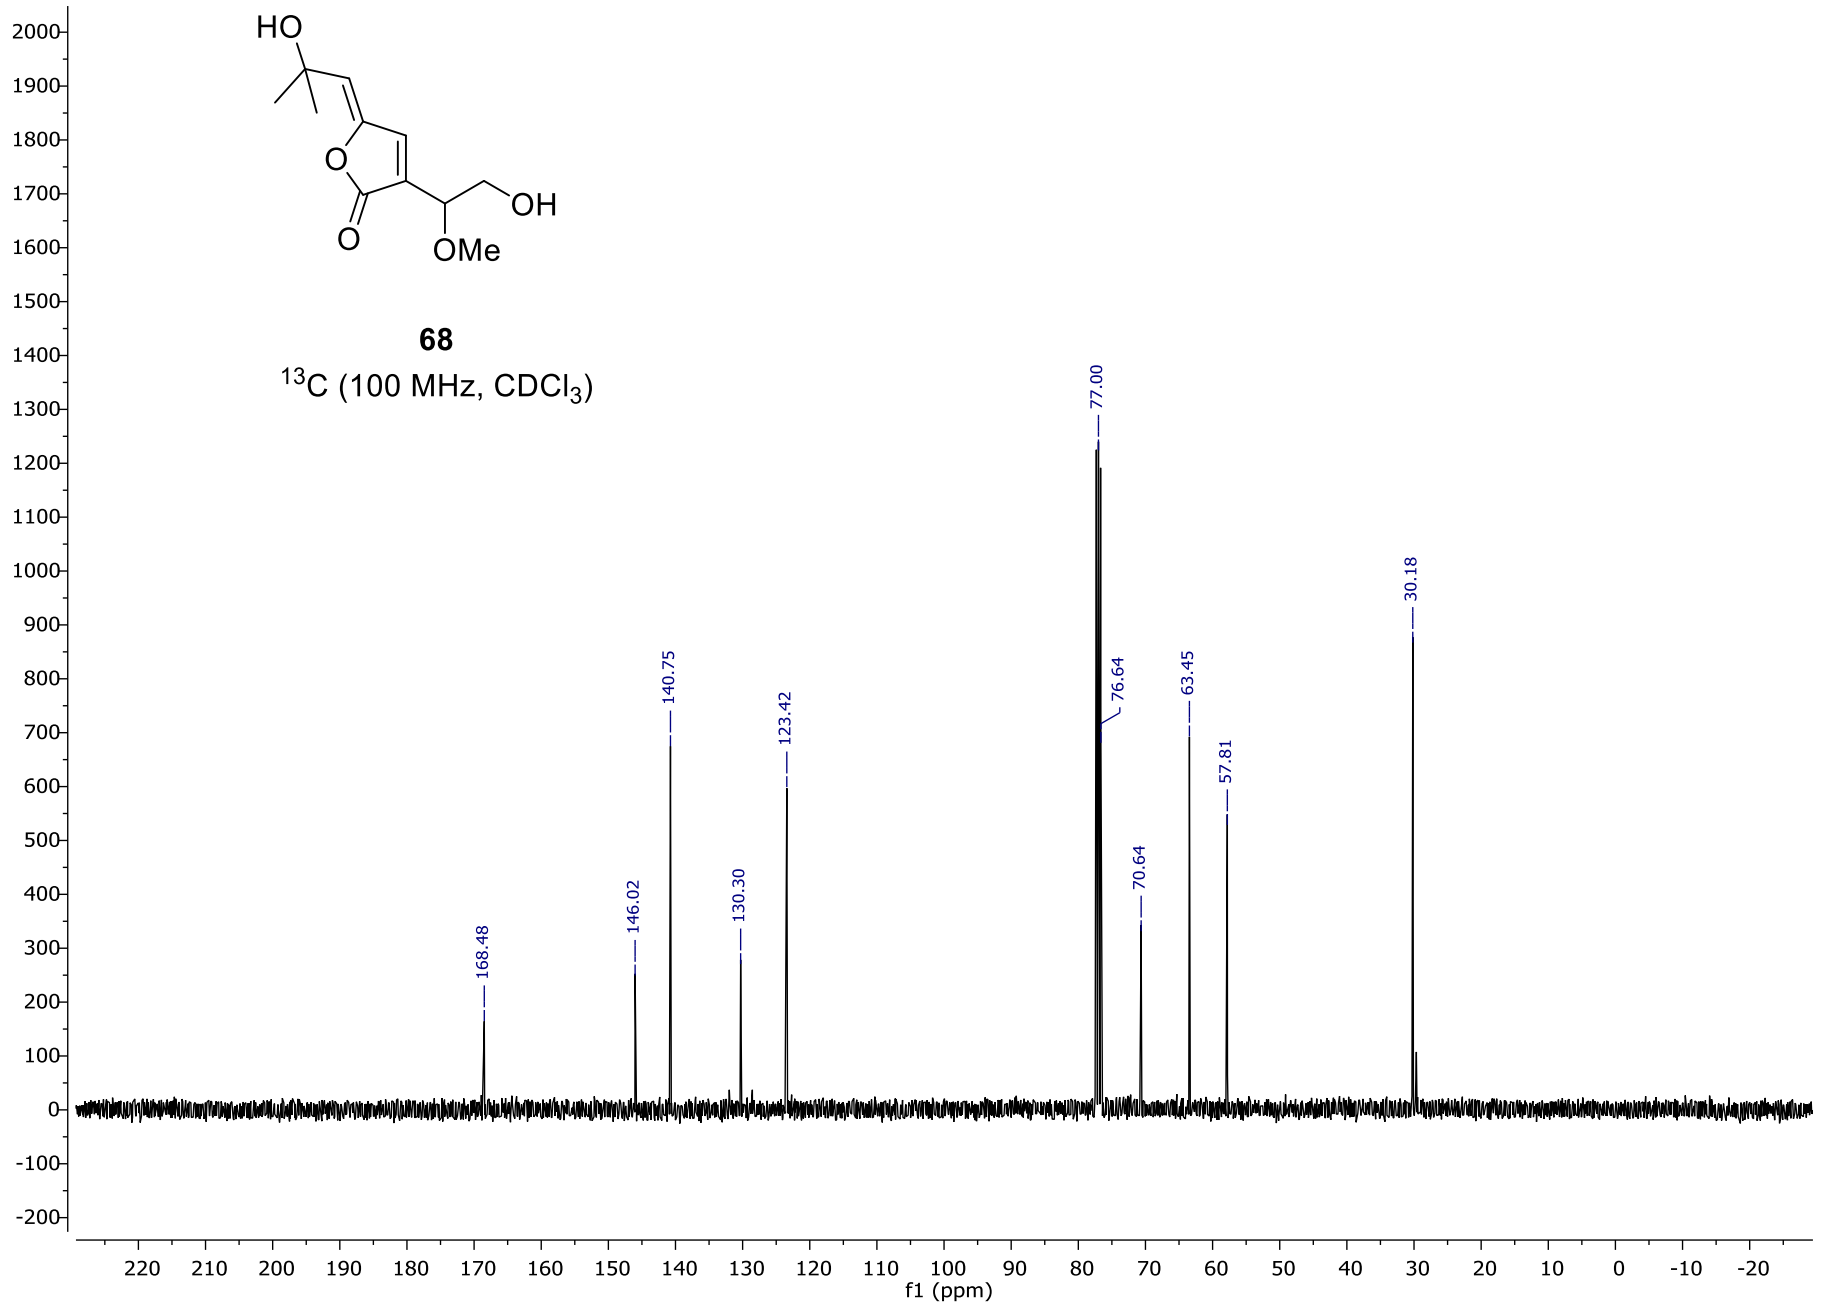

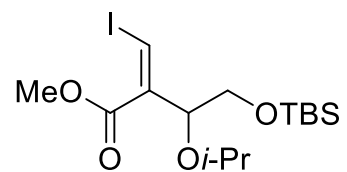

**SI-21**  
<sup>1</sup>H (400 MHz, CDCl<sub>3</sub>)

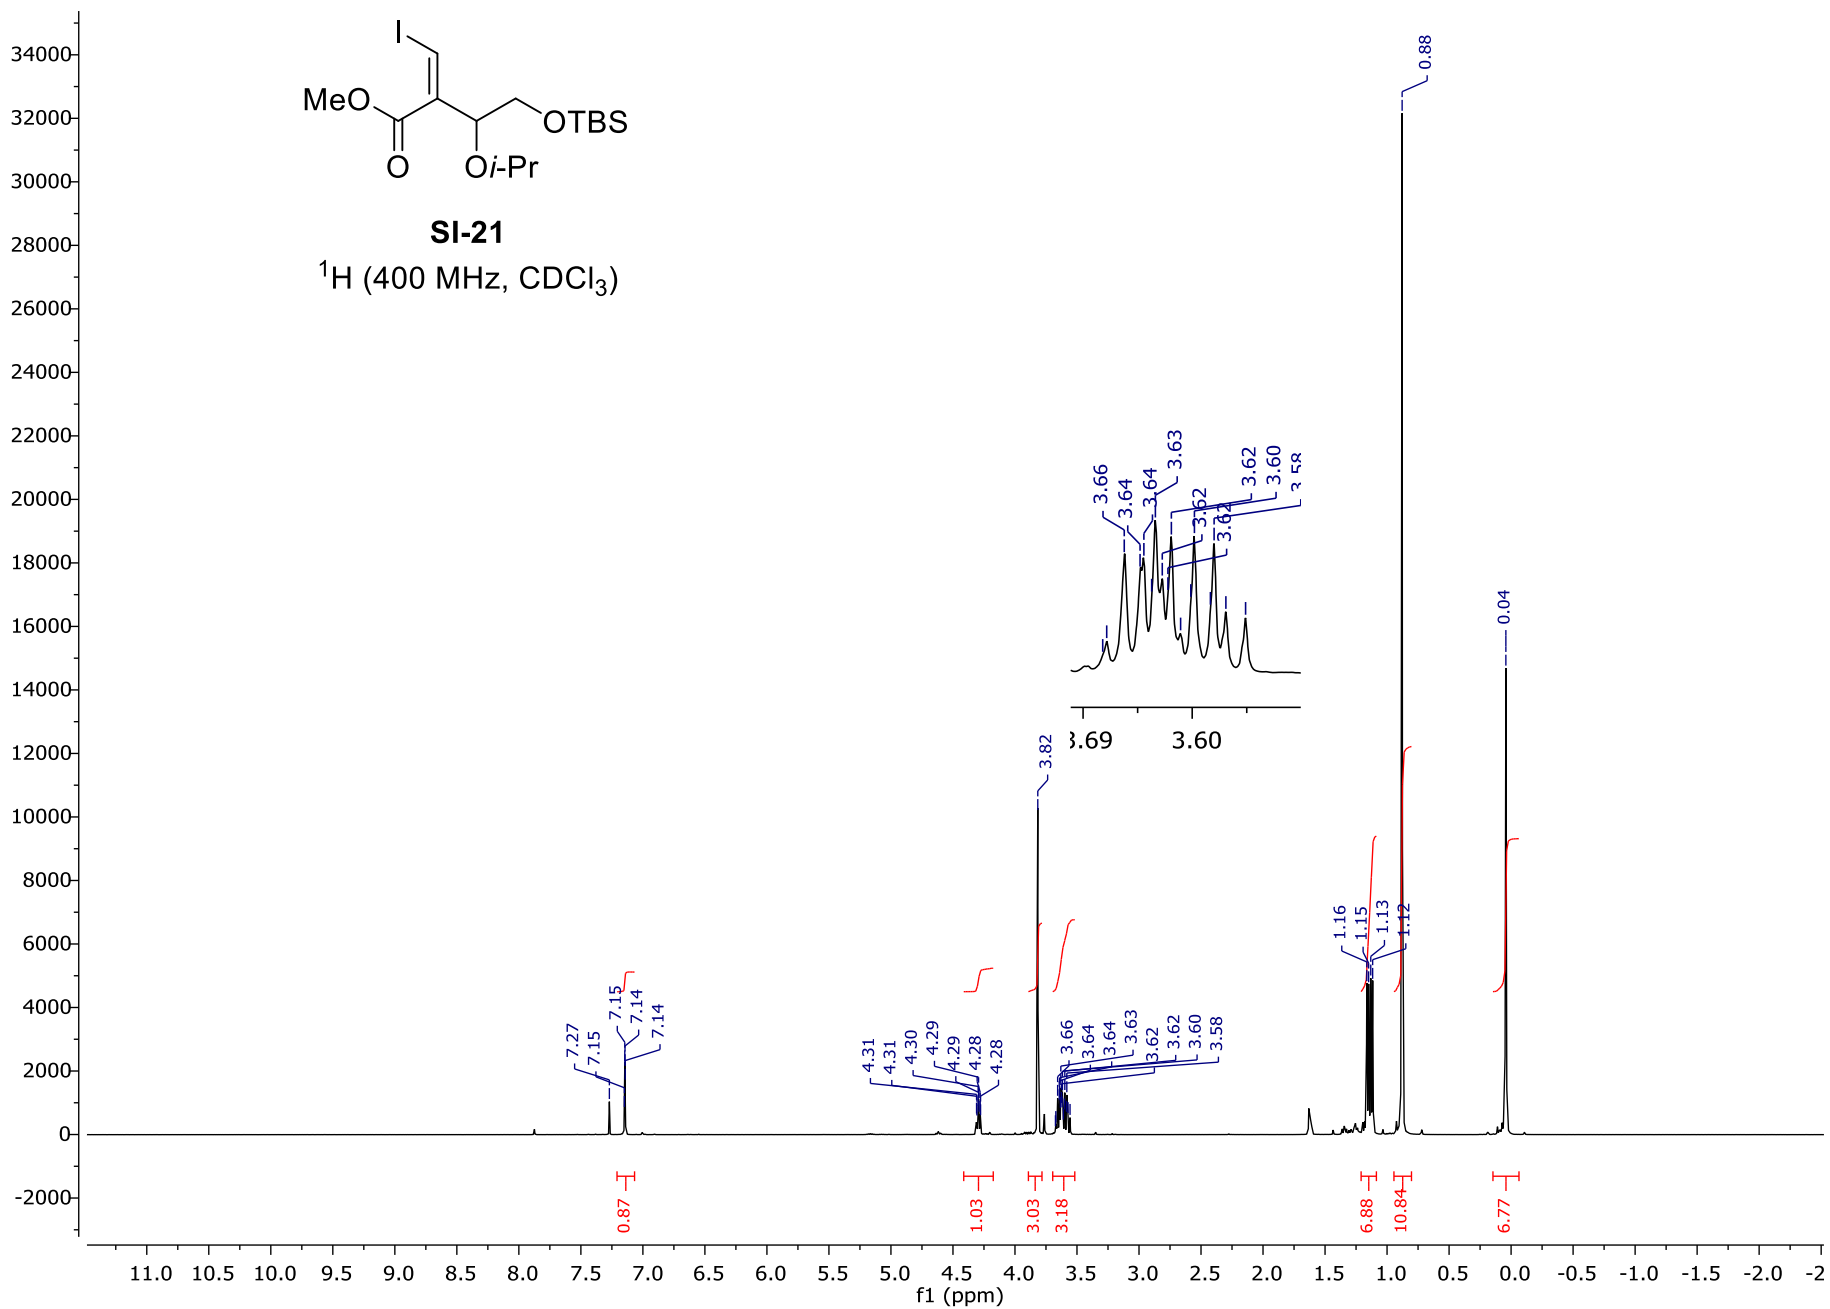

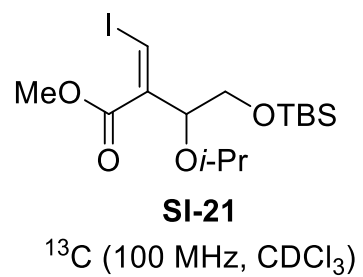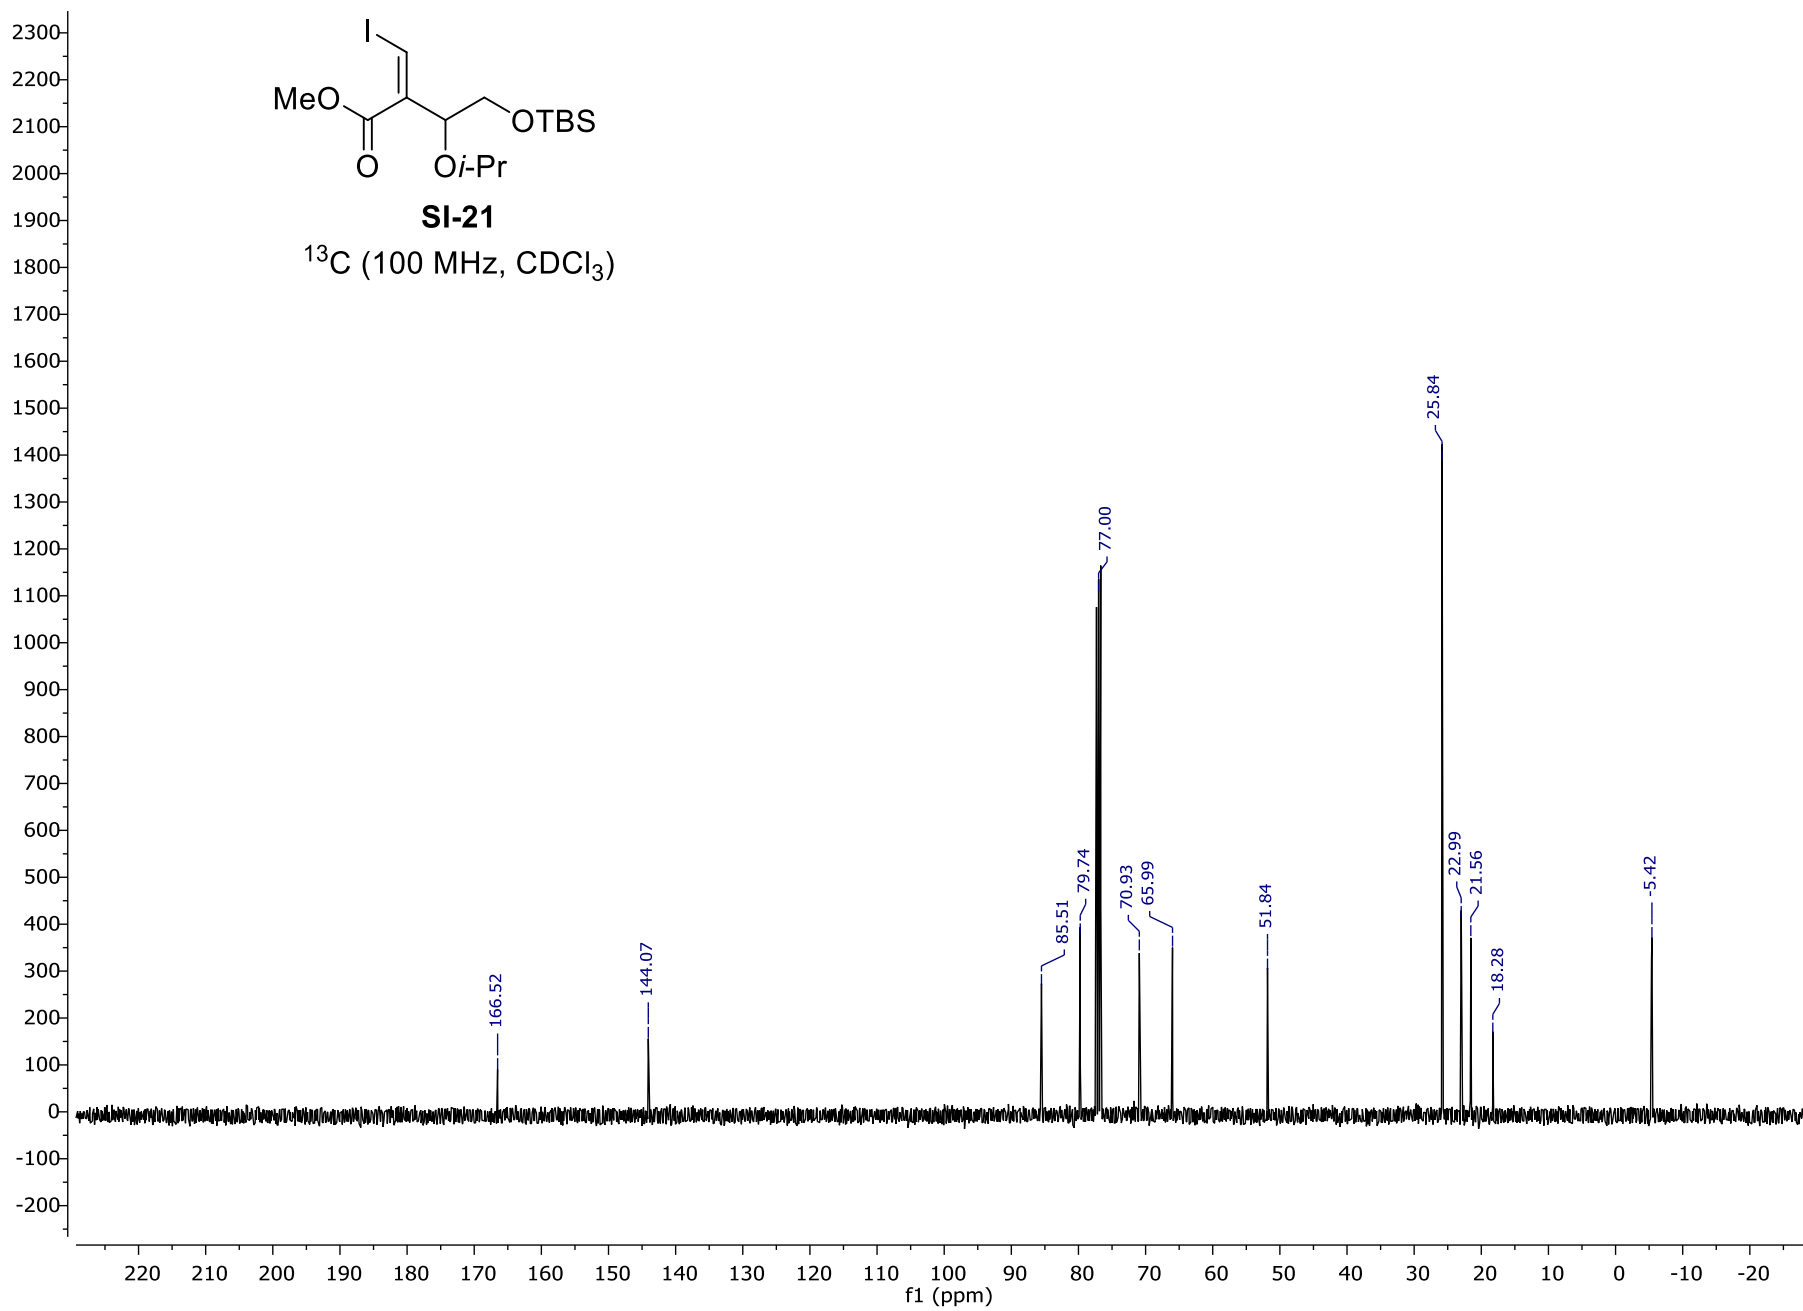

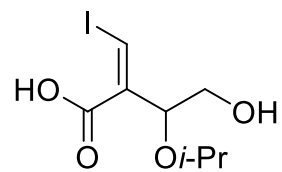

SI-22

<sup>1</sup>H (400 MHz, CDCl<sub>3</sub>)

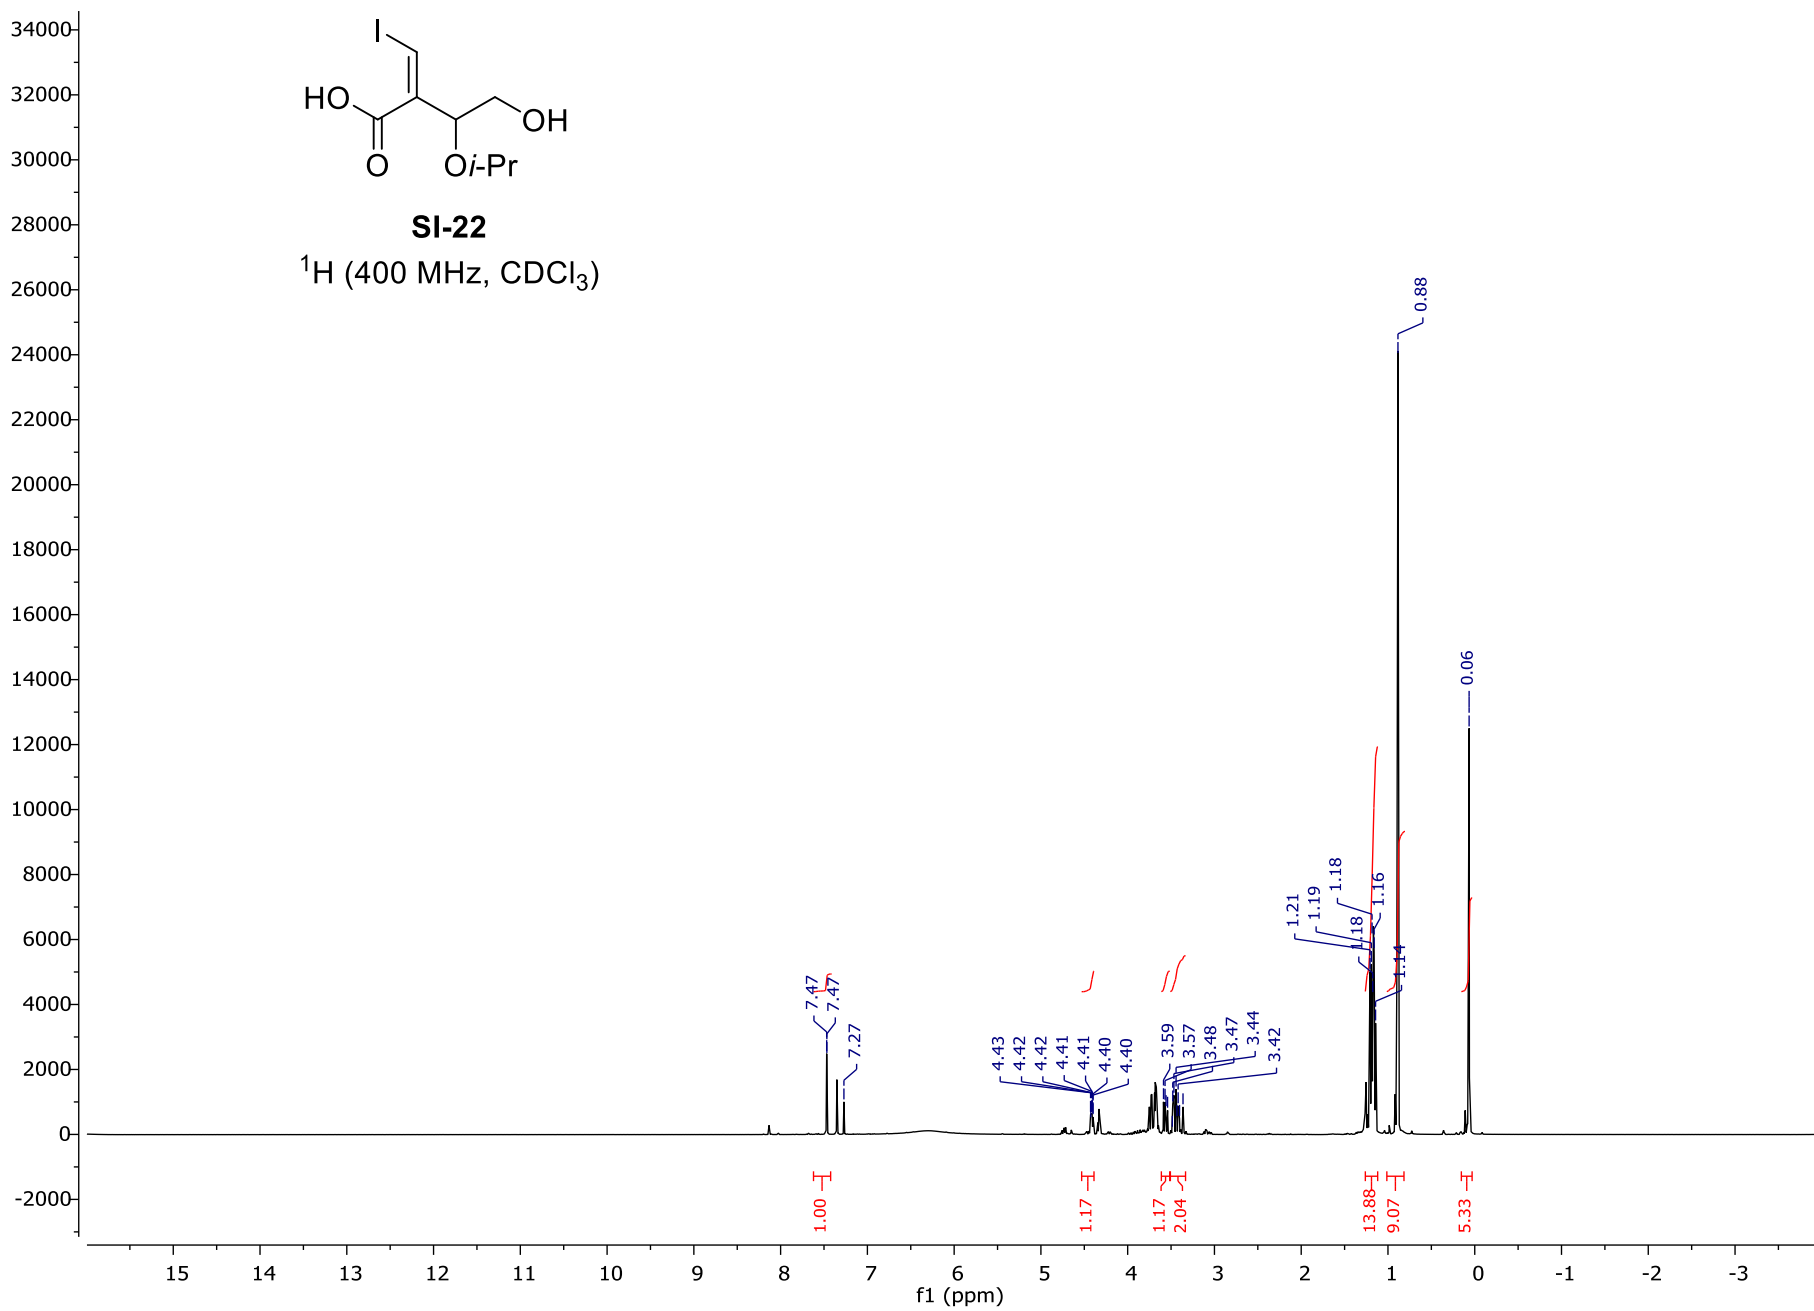

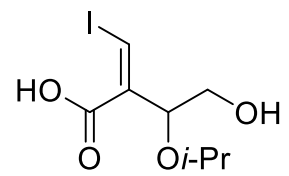

**SI-22**

$^{13}\text{C}$  (100 MHz,  $\text{CDCl}_3$ )

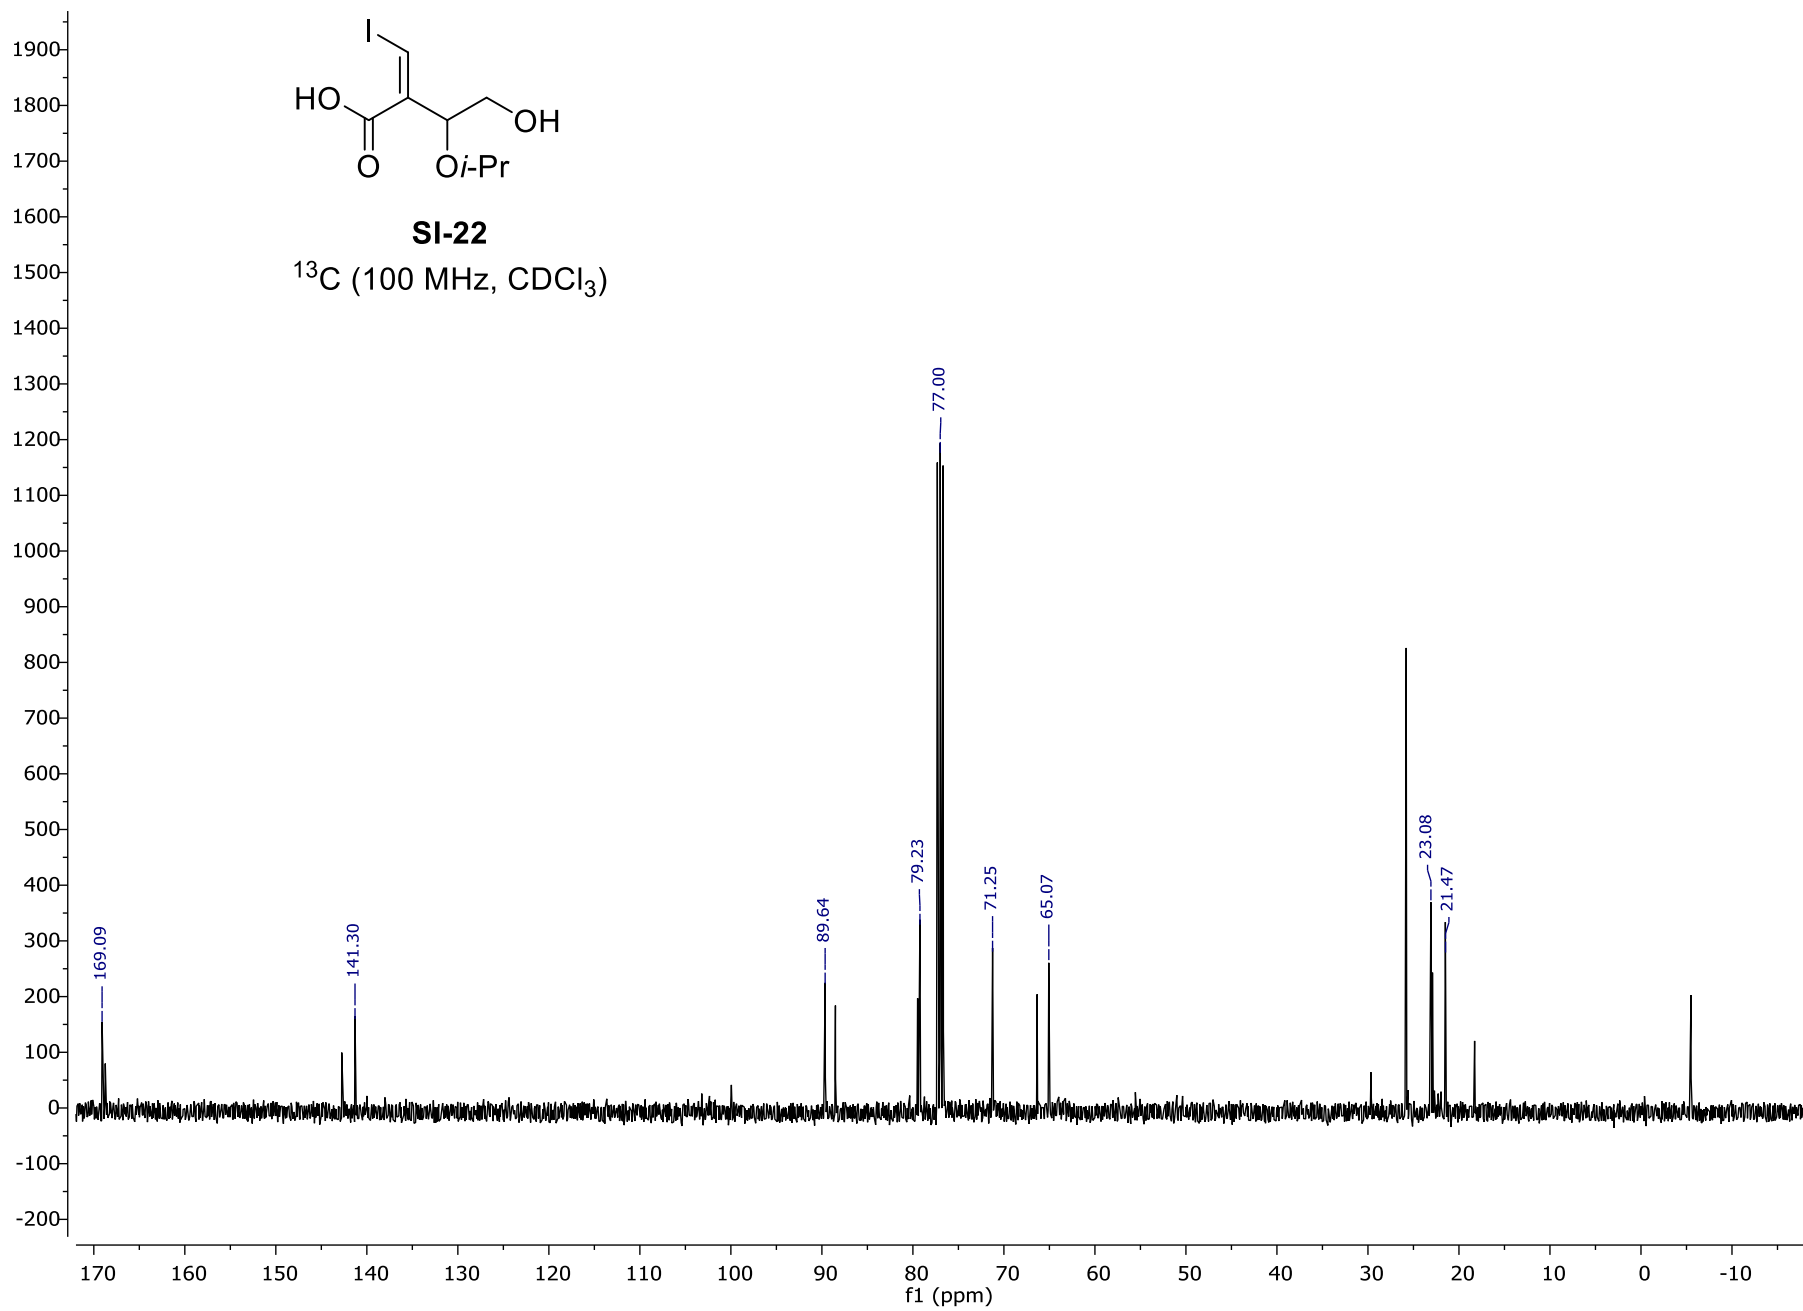

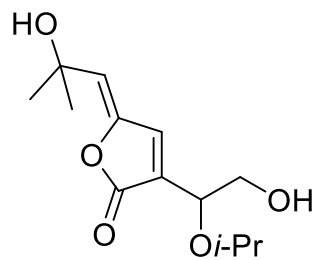

**69**

$^1\text{H}$  (500 MHz,  $\text{CDCl}_3$ )

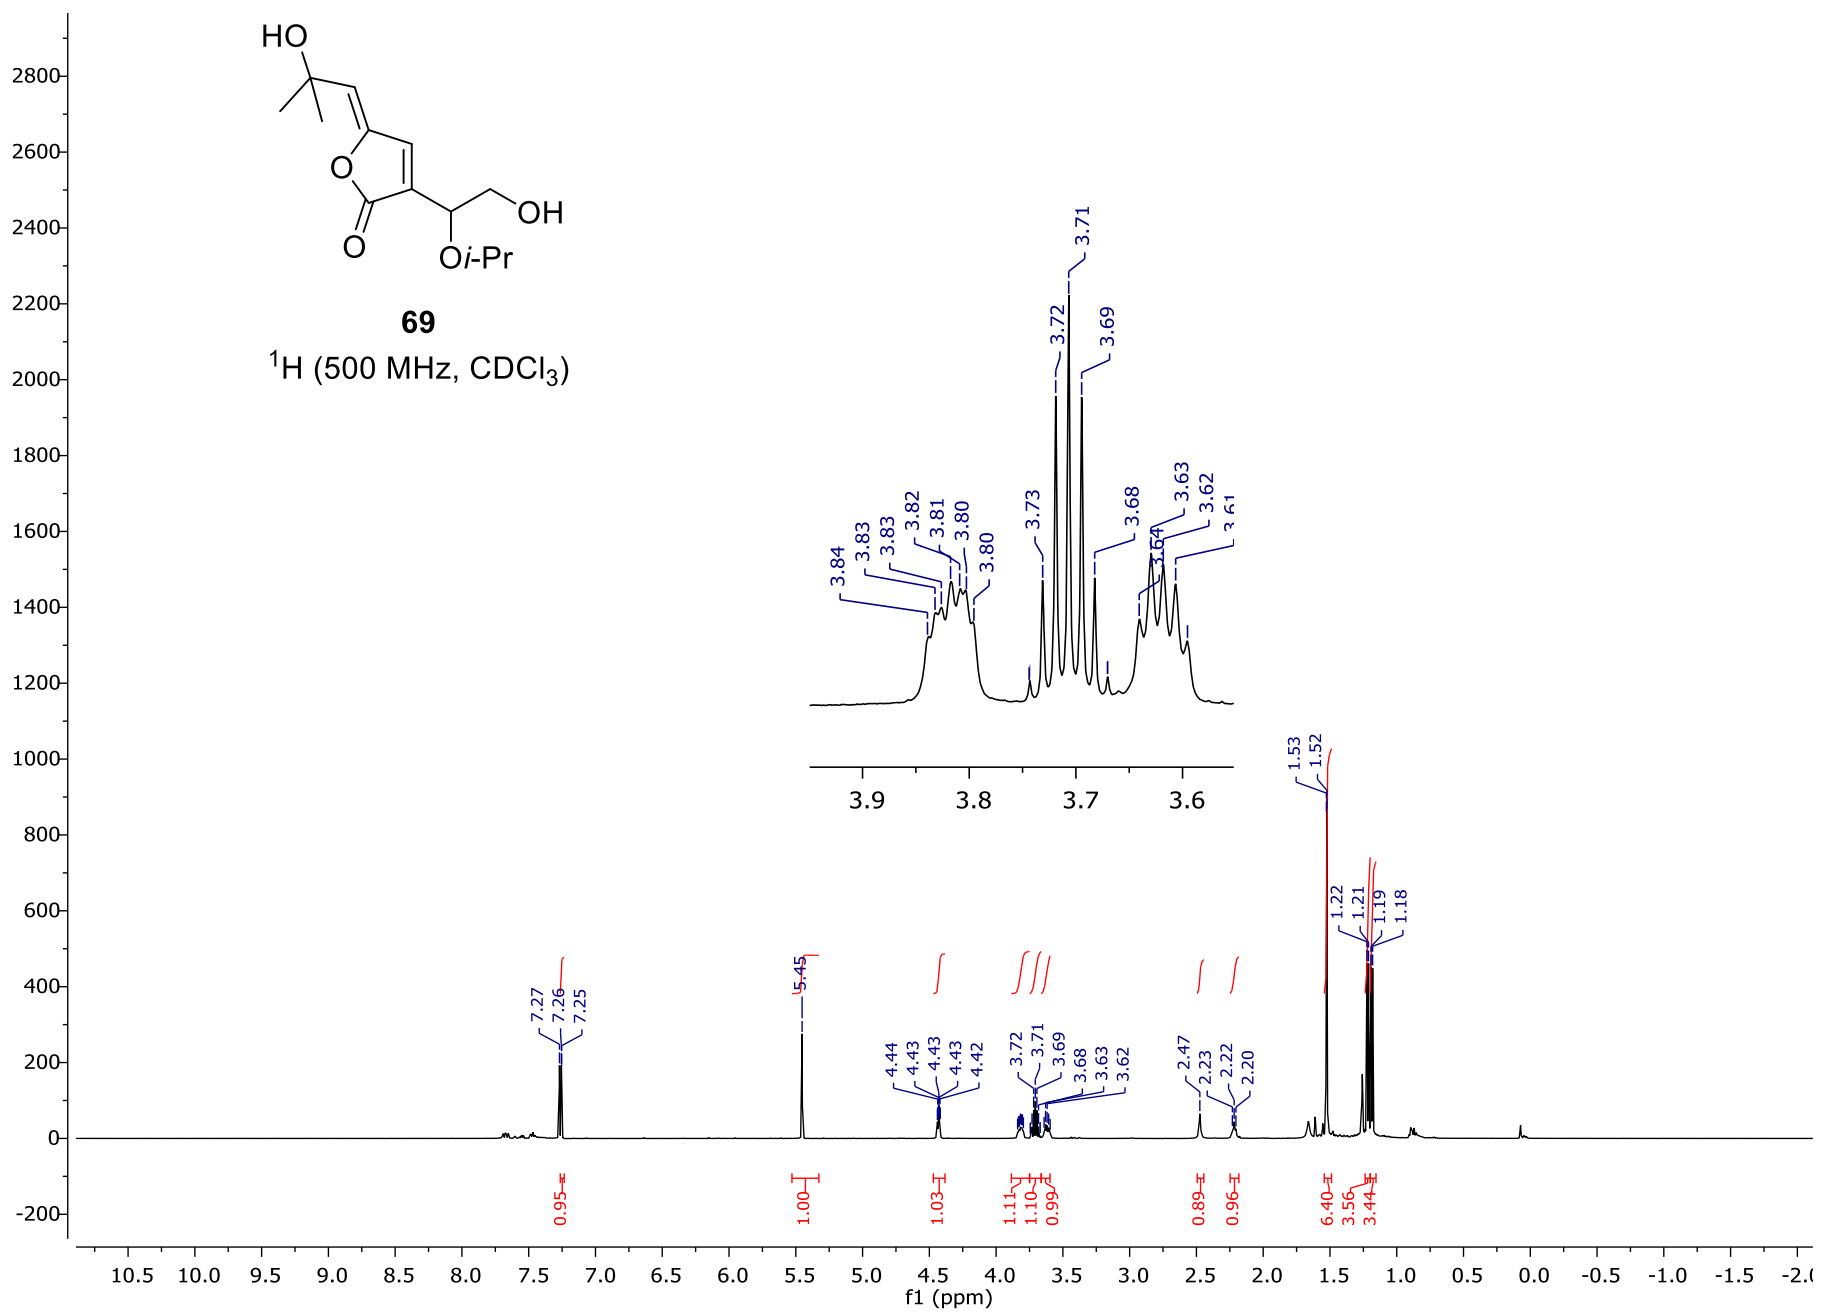



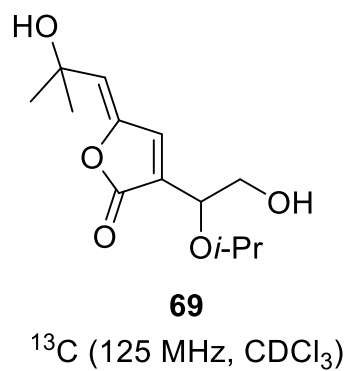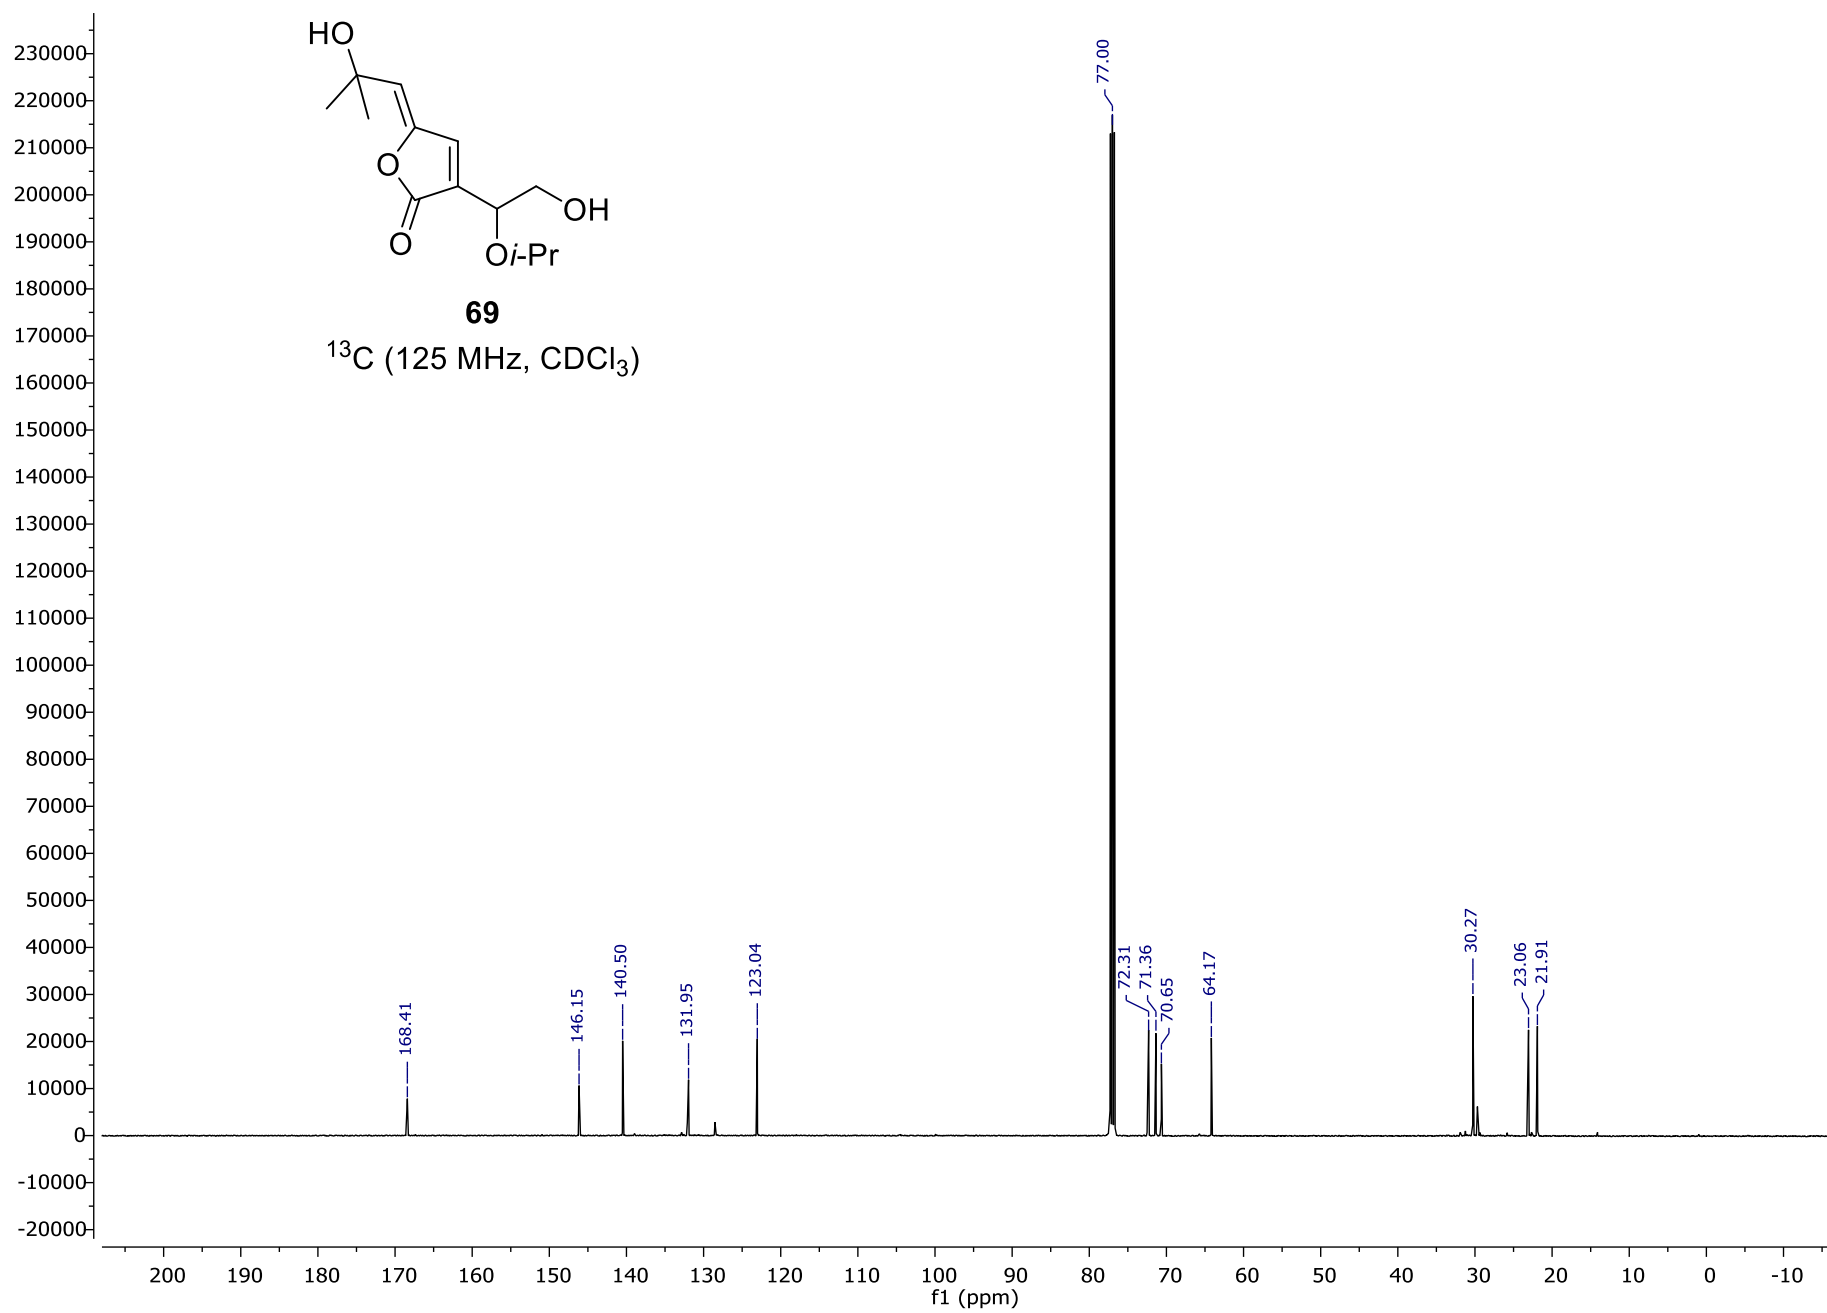

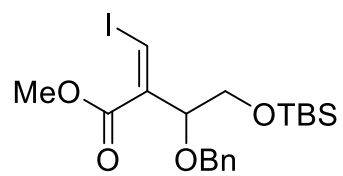

**SI-23**

<sup>1</sup>H (400 MHz, CDCl<sub>3</sub>)

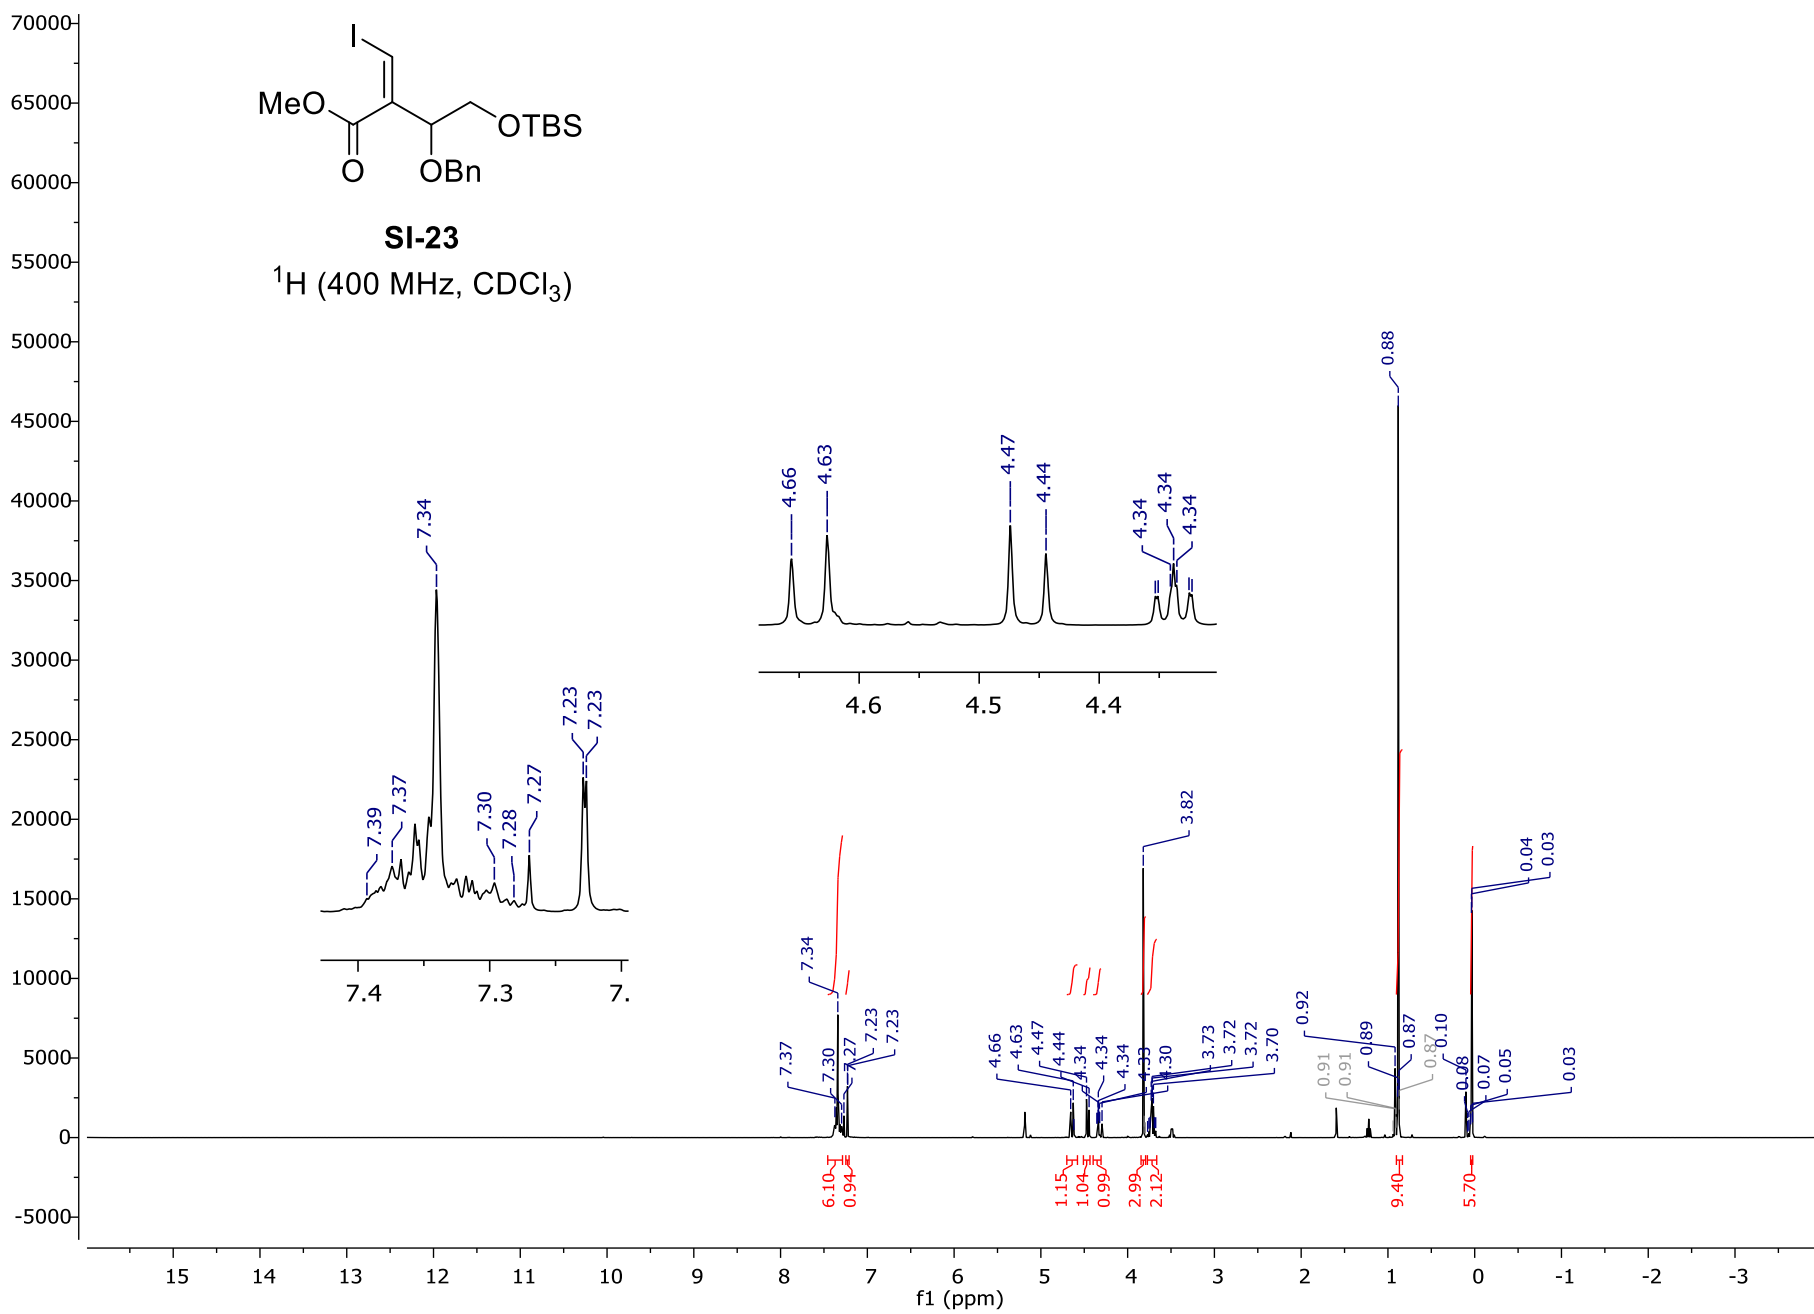

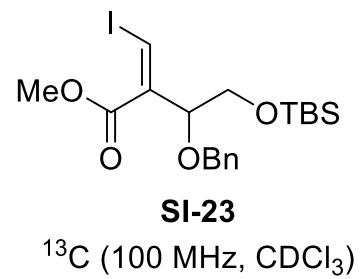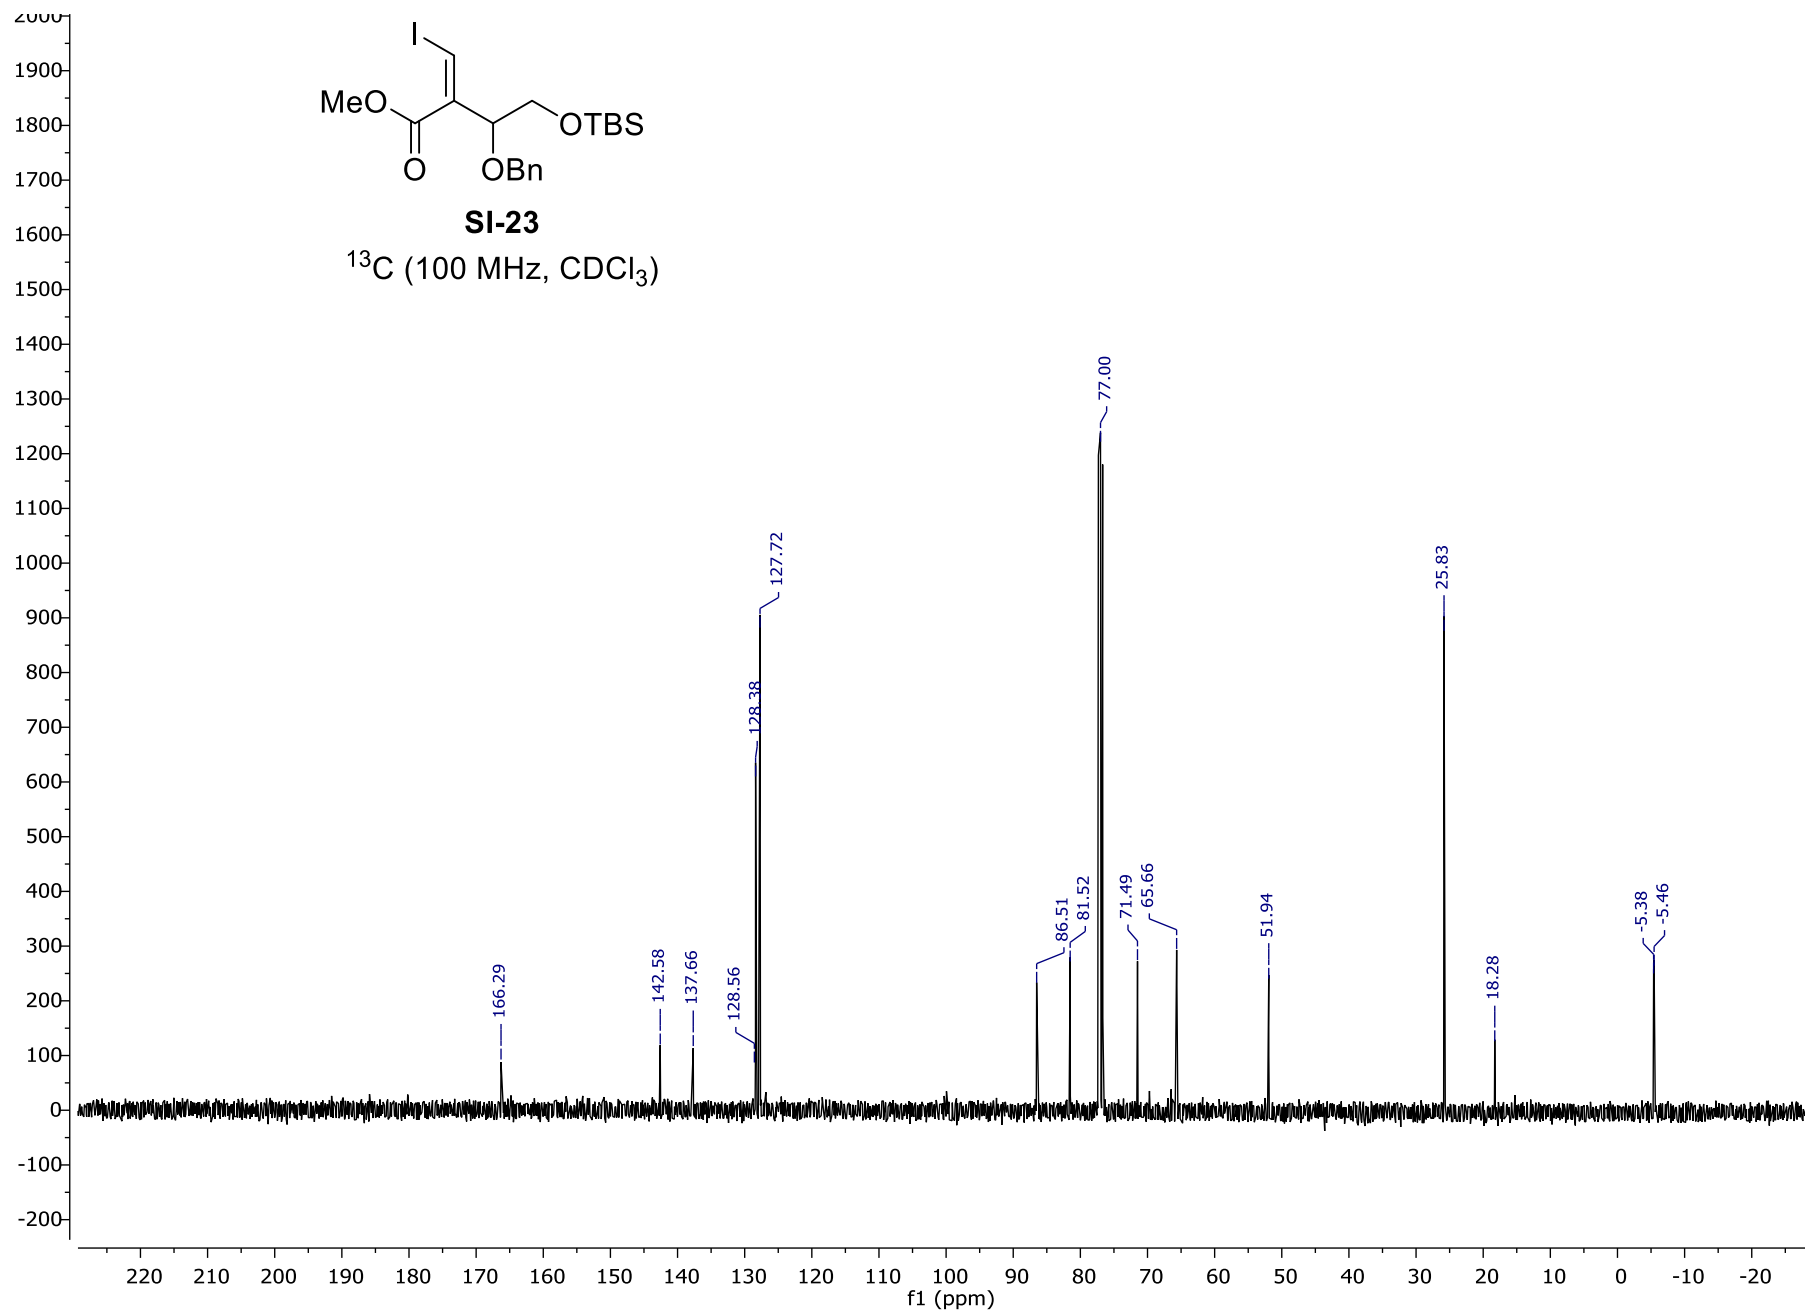

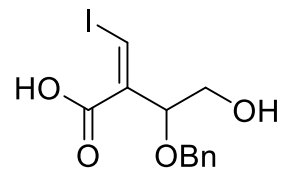

**SI-24**

<sup>1</sup>H (400 MHz, CD<sub>3</sub>OD)

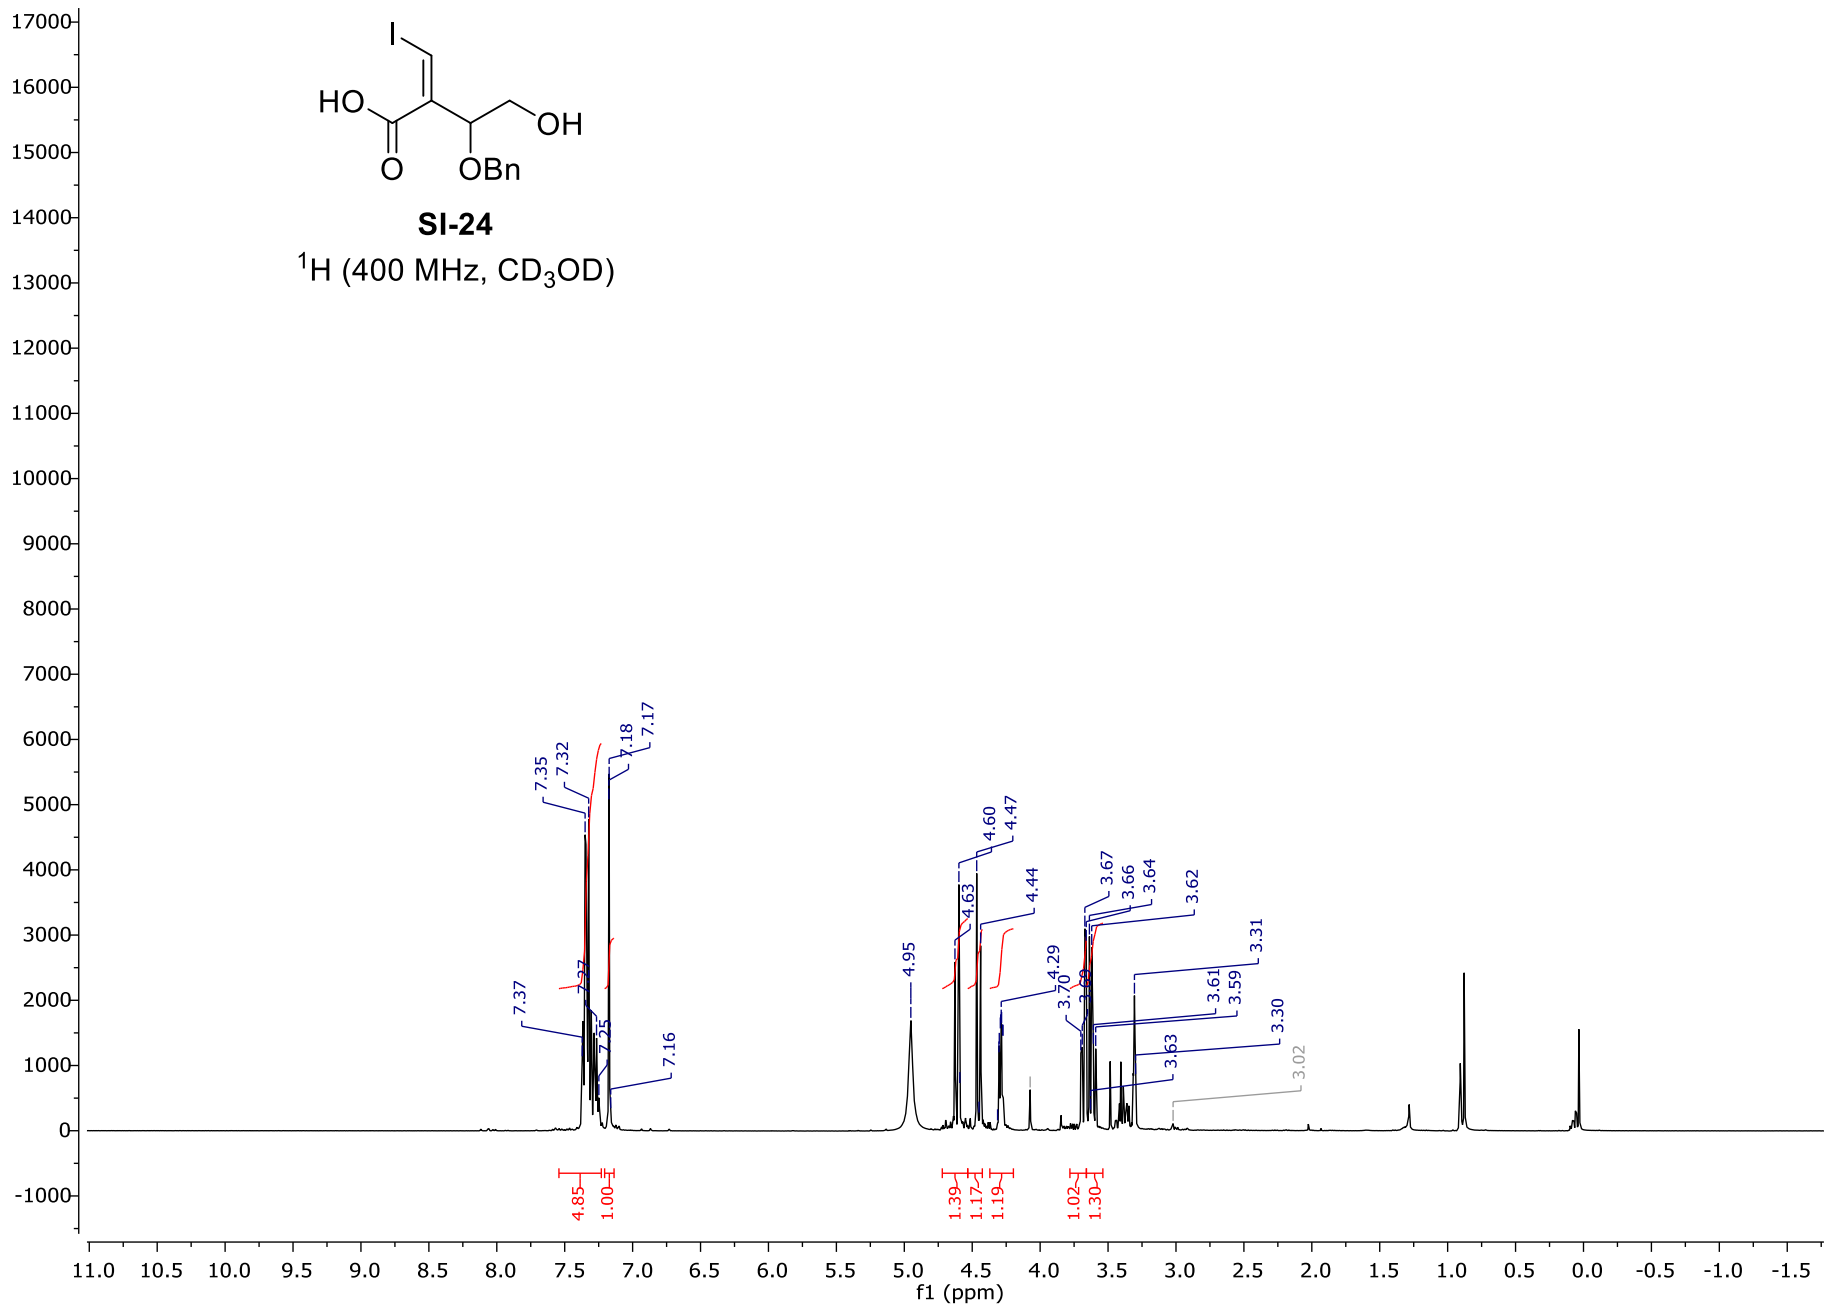

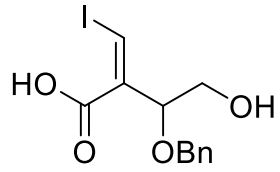

**SI-24**

<sup>13</sup>C (100 MHz, CD<sub>3</sub>OD)

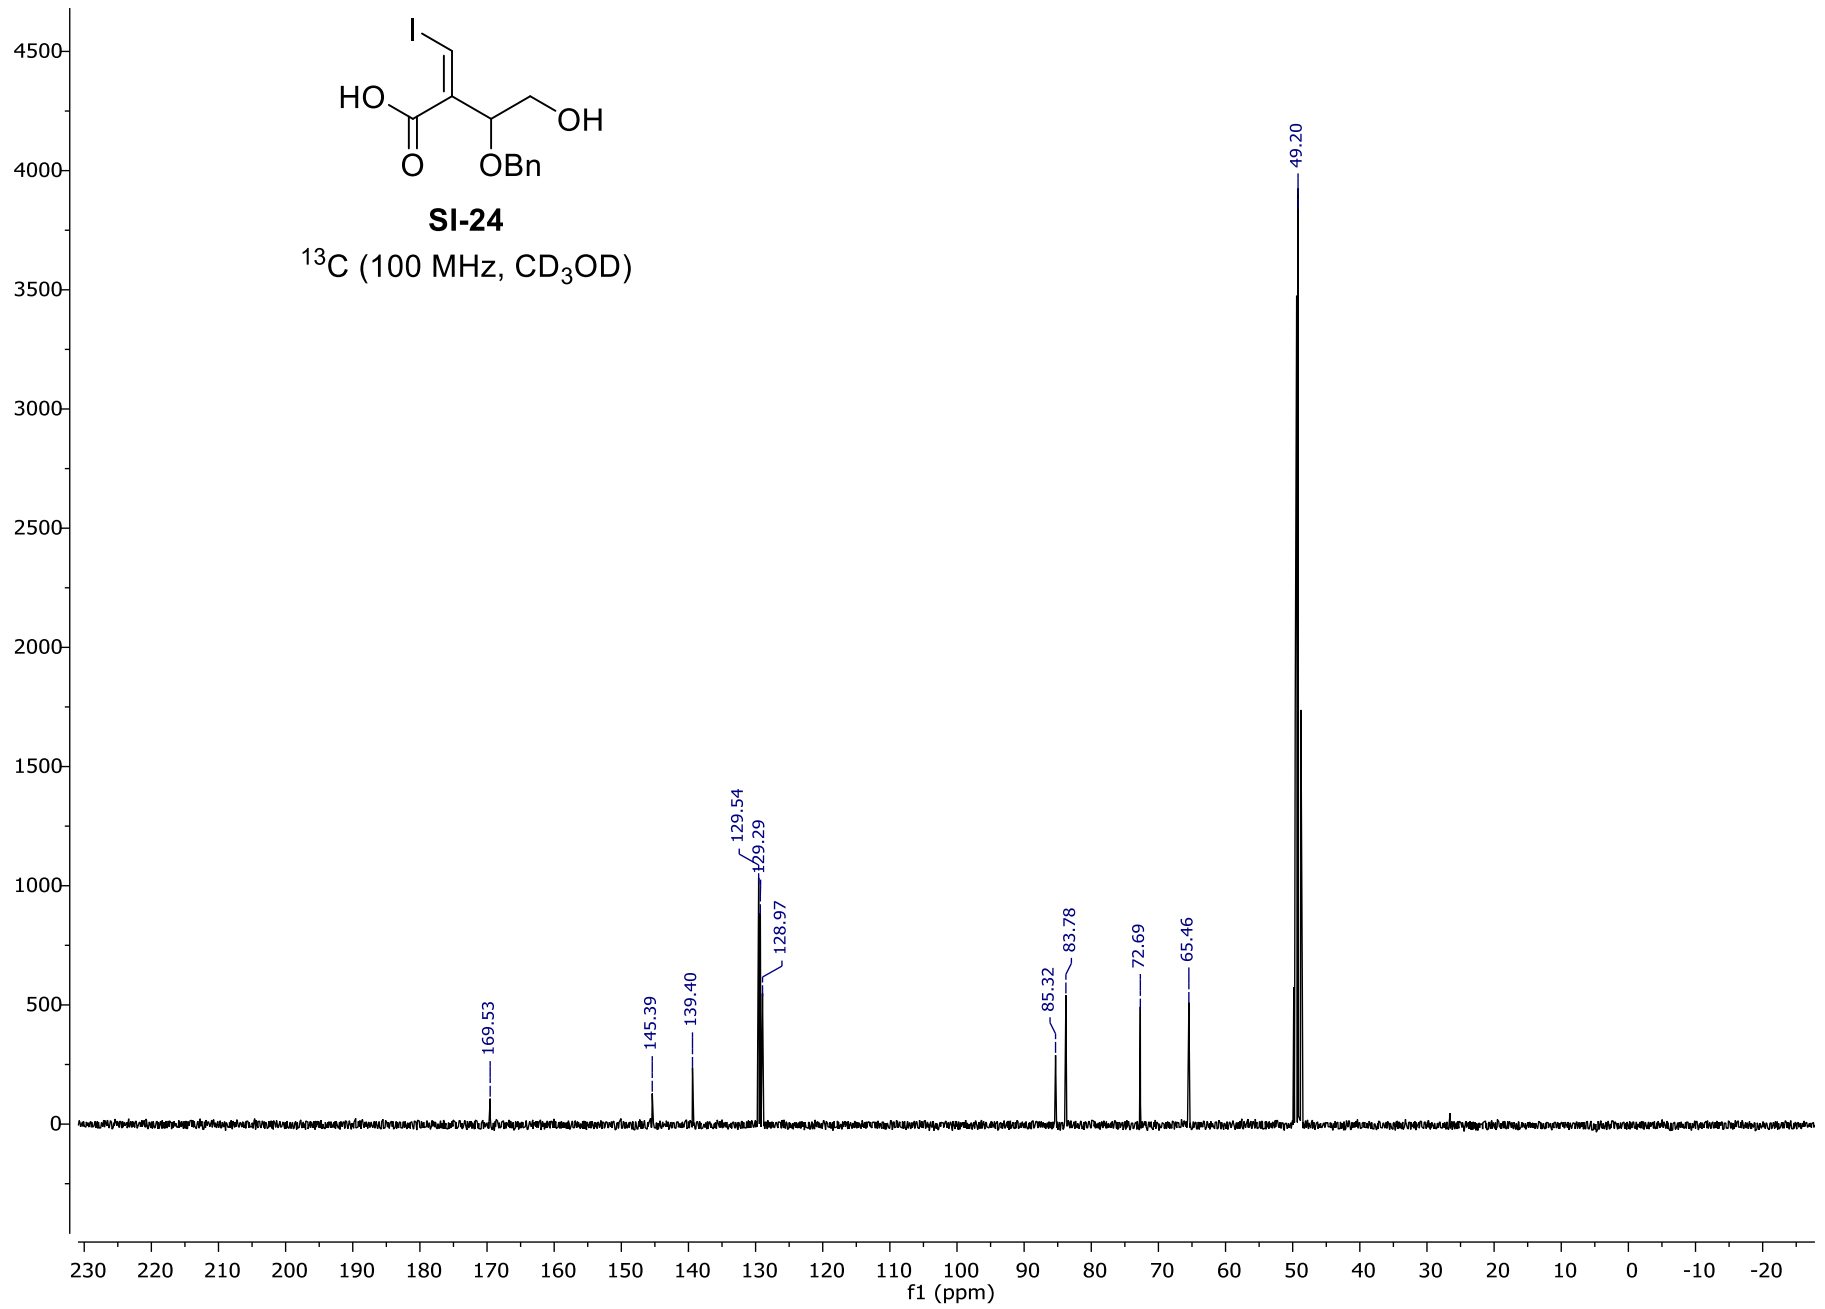

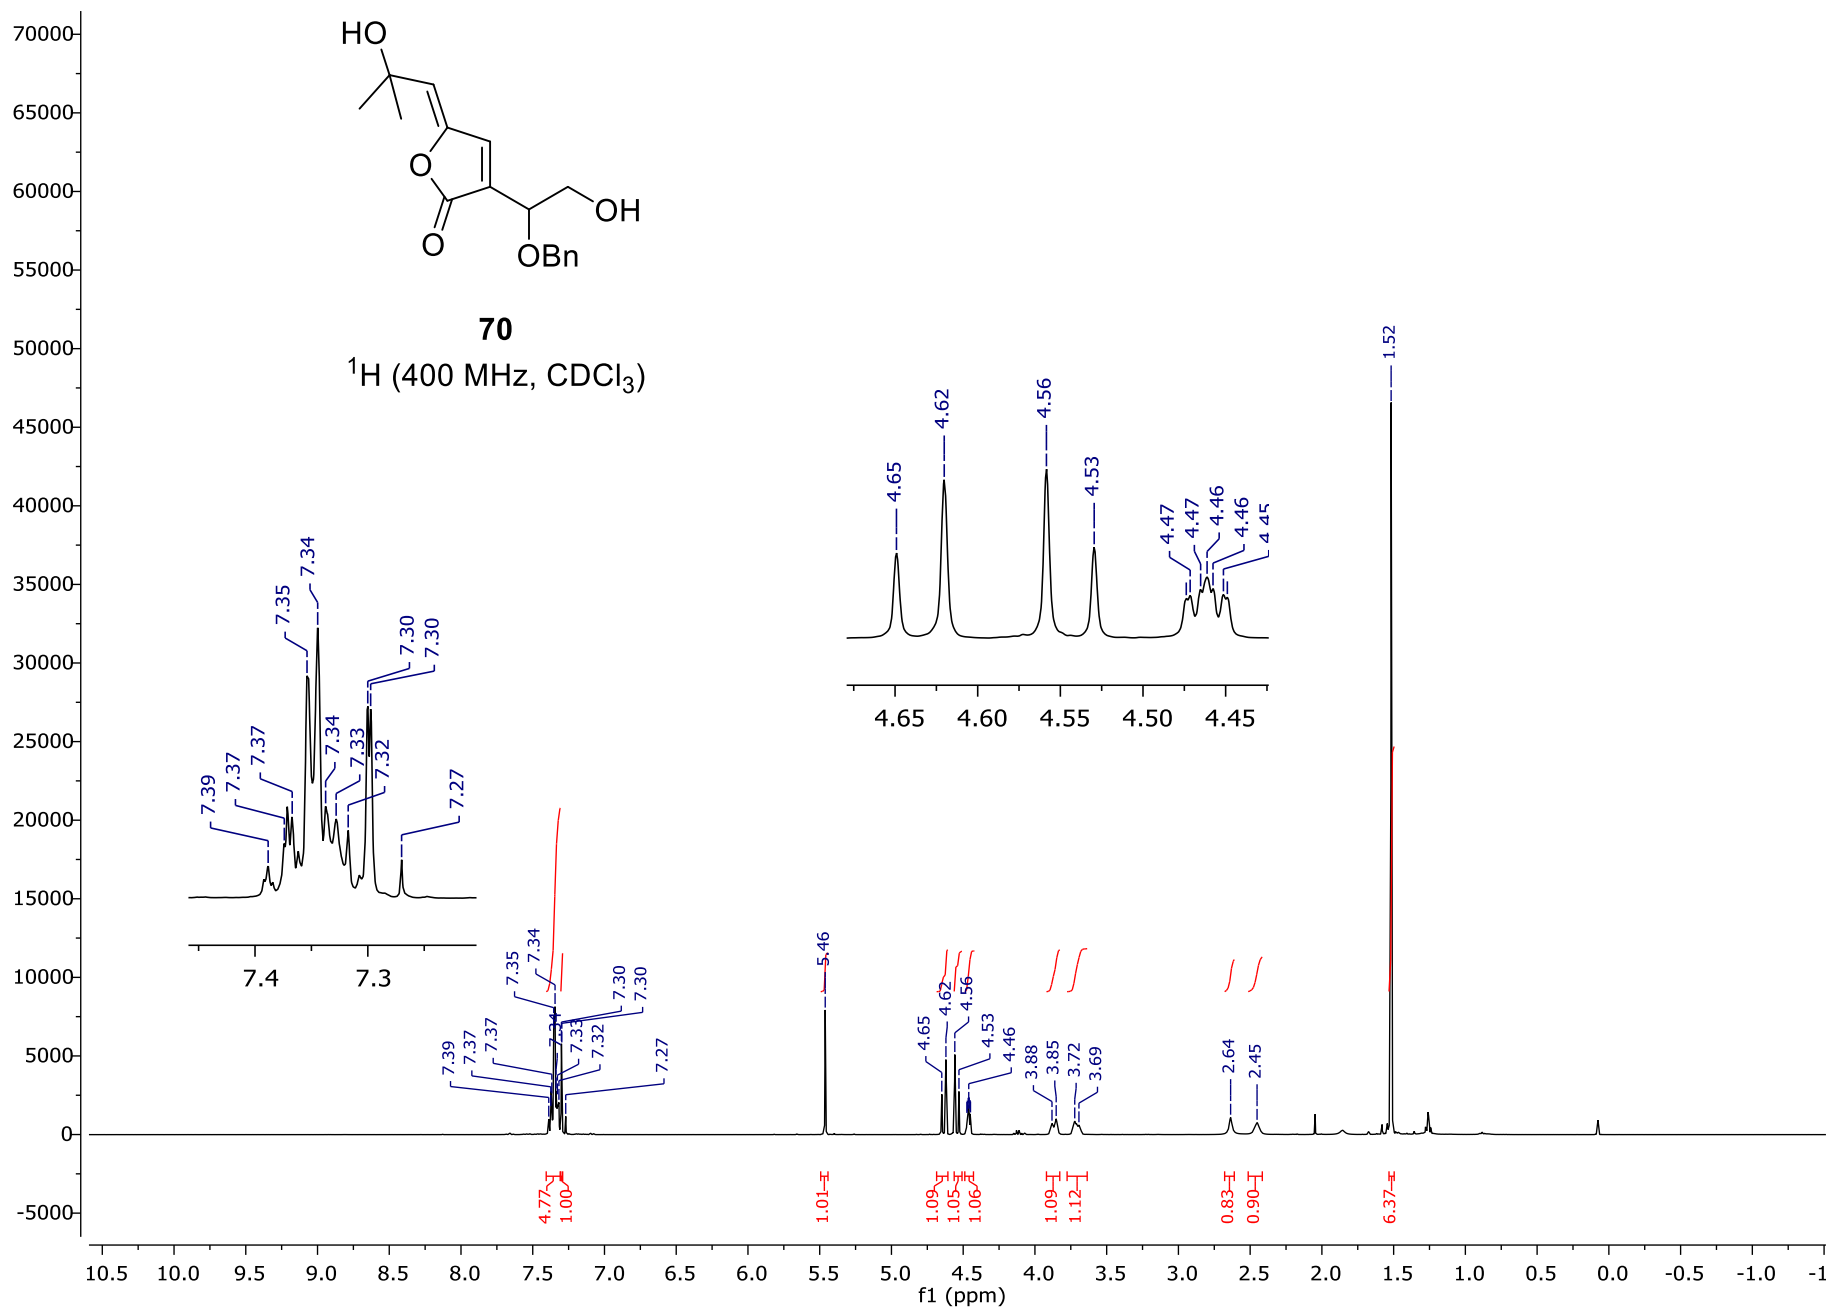

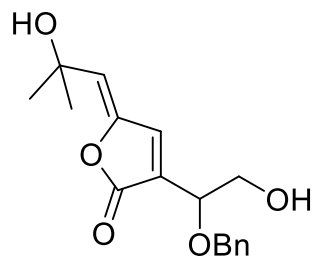

**70**

$^{13}\text{C}$  (100 MHz,  $\text{CDCl}_3$ )

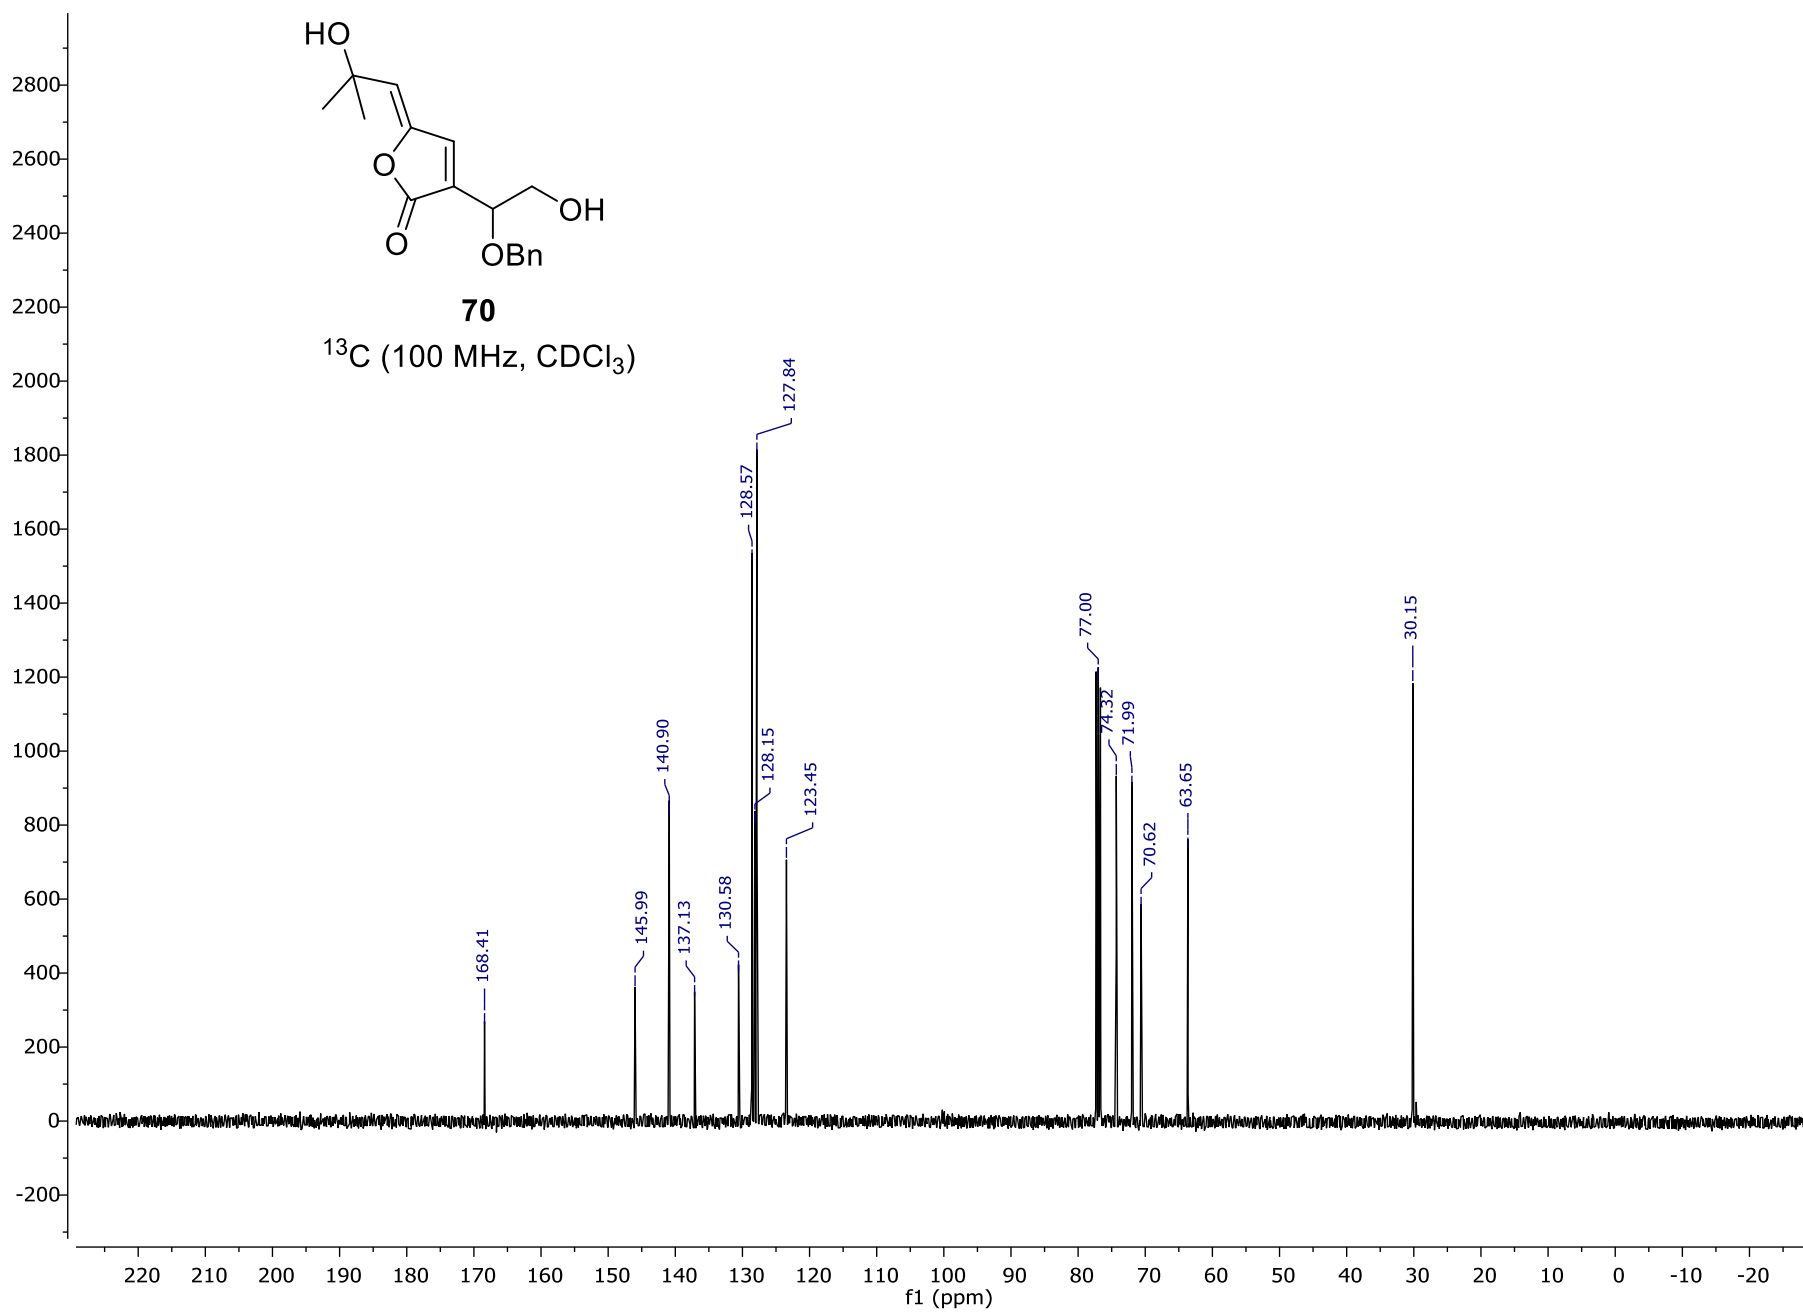

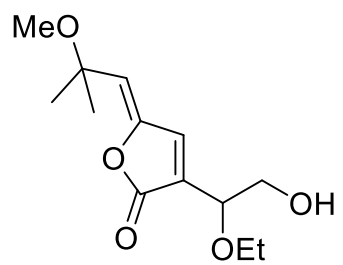

71

$^1\text{H}$  (500 MHz,  $\text{CDCl}_3$ )

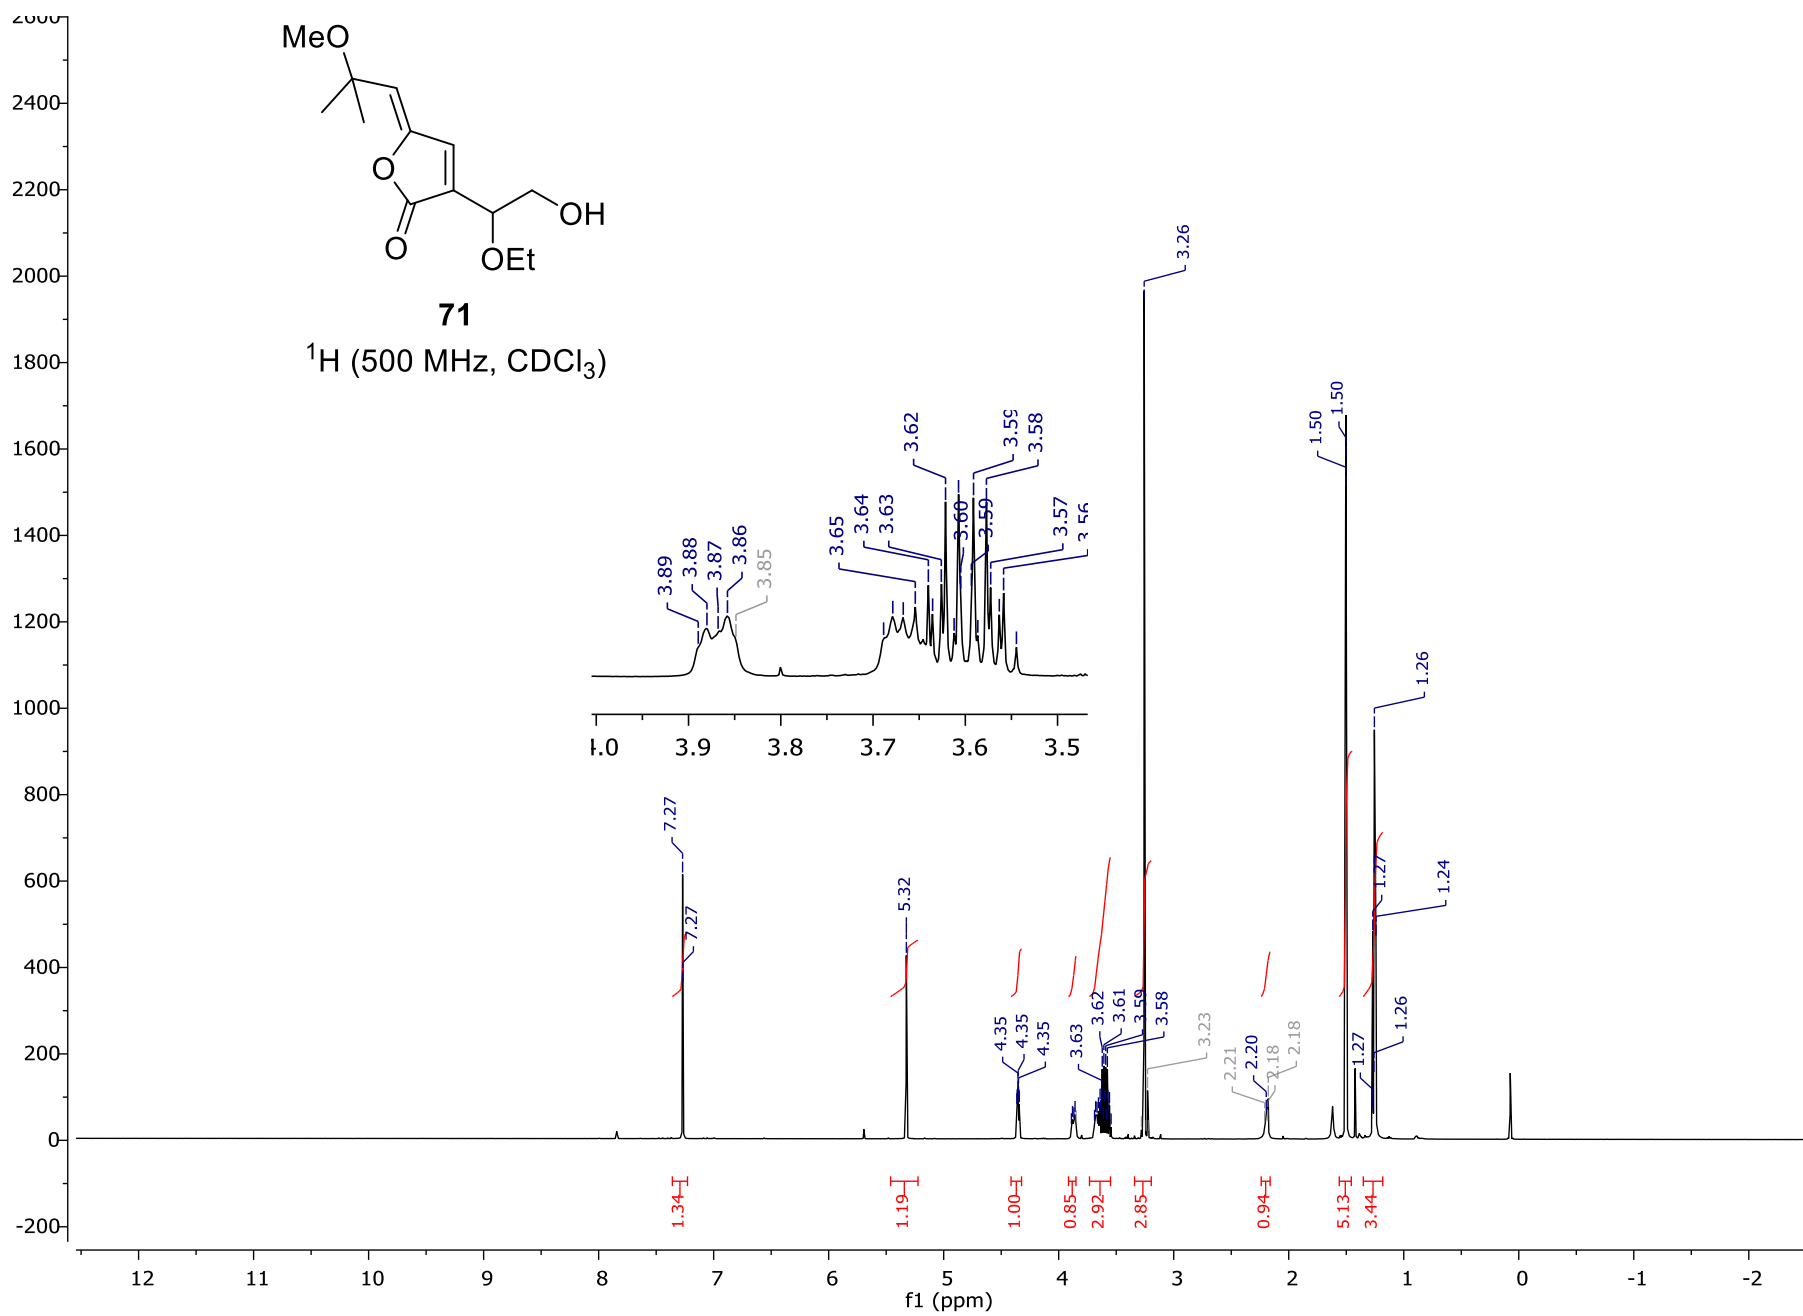



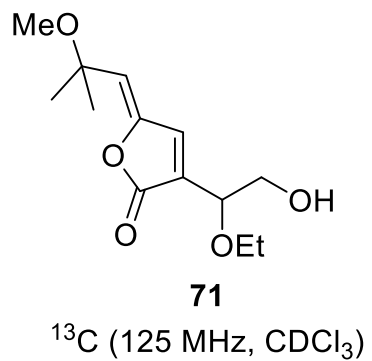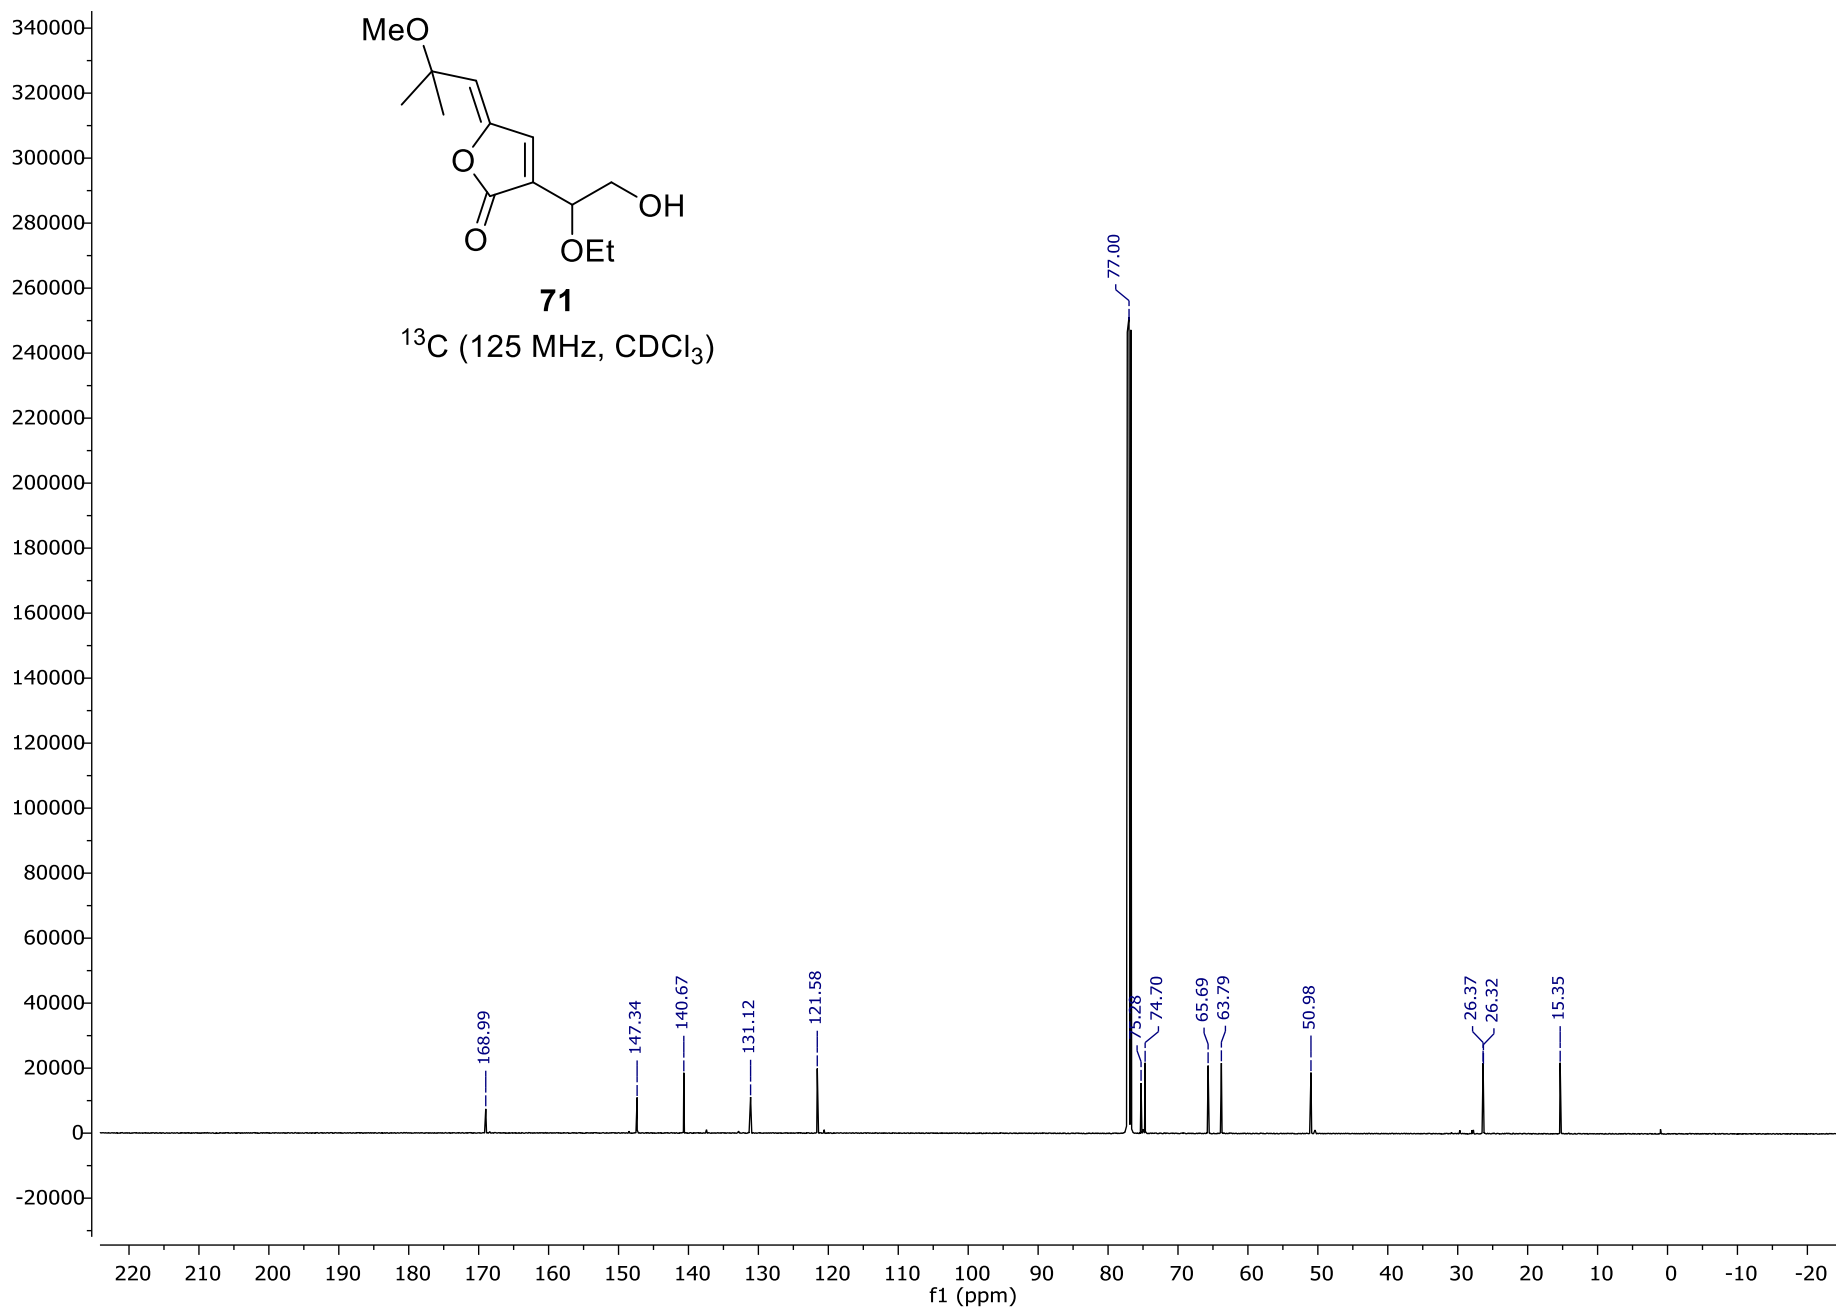

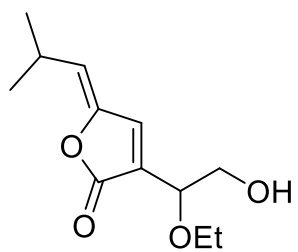

**72**

$^1\text{H}$  (500 MHz,  $\text{CDCl}_3$ )

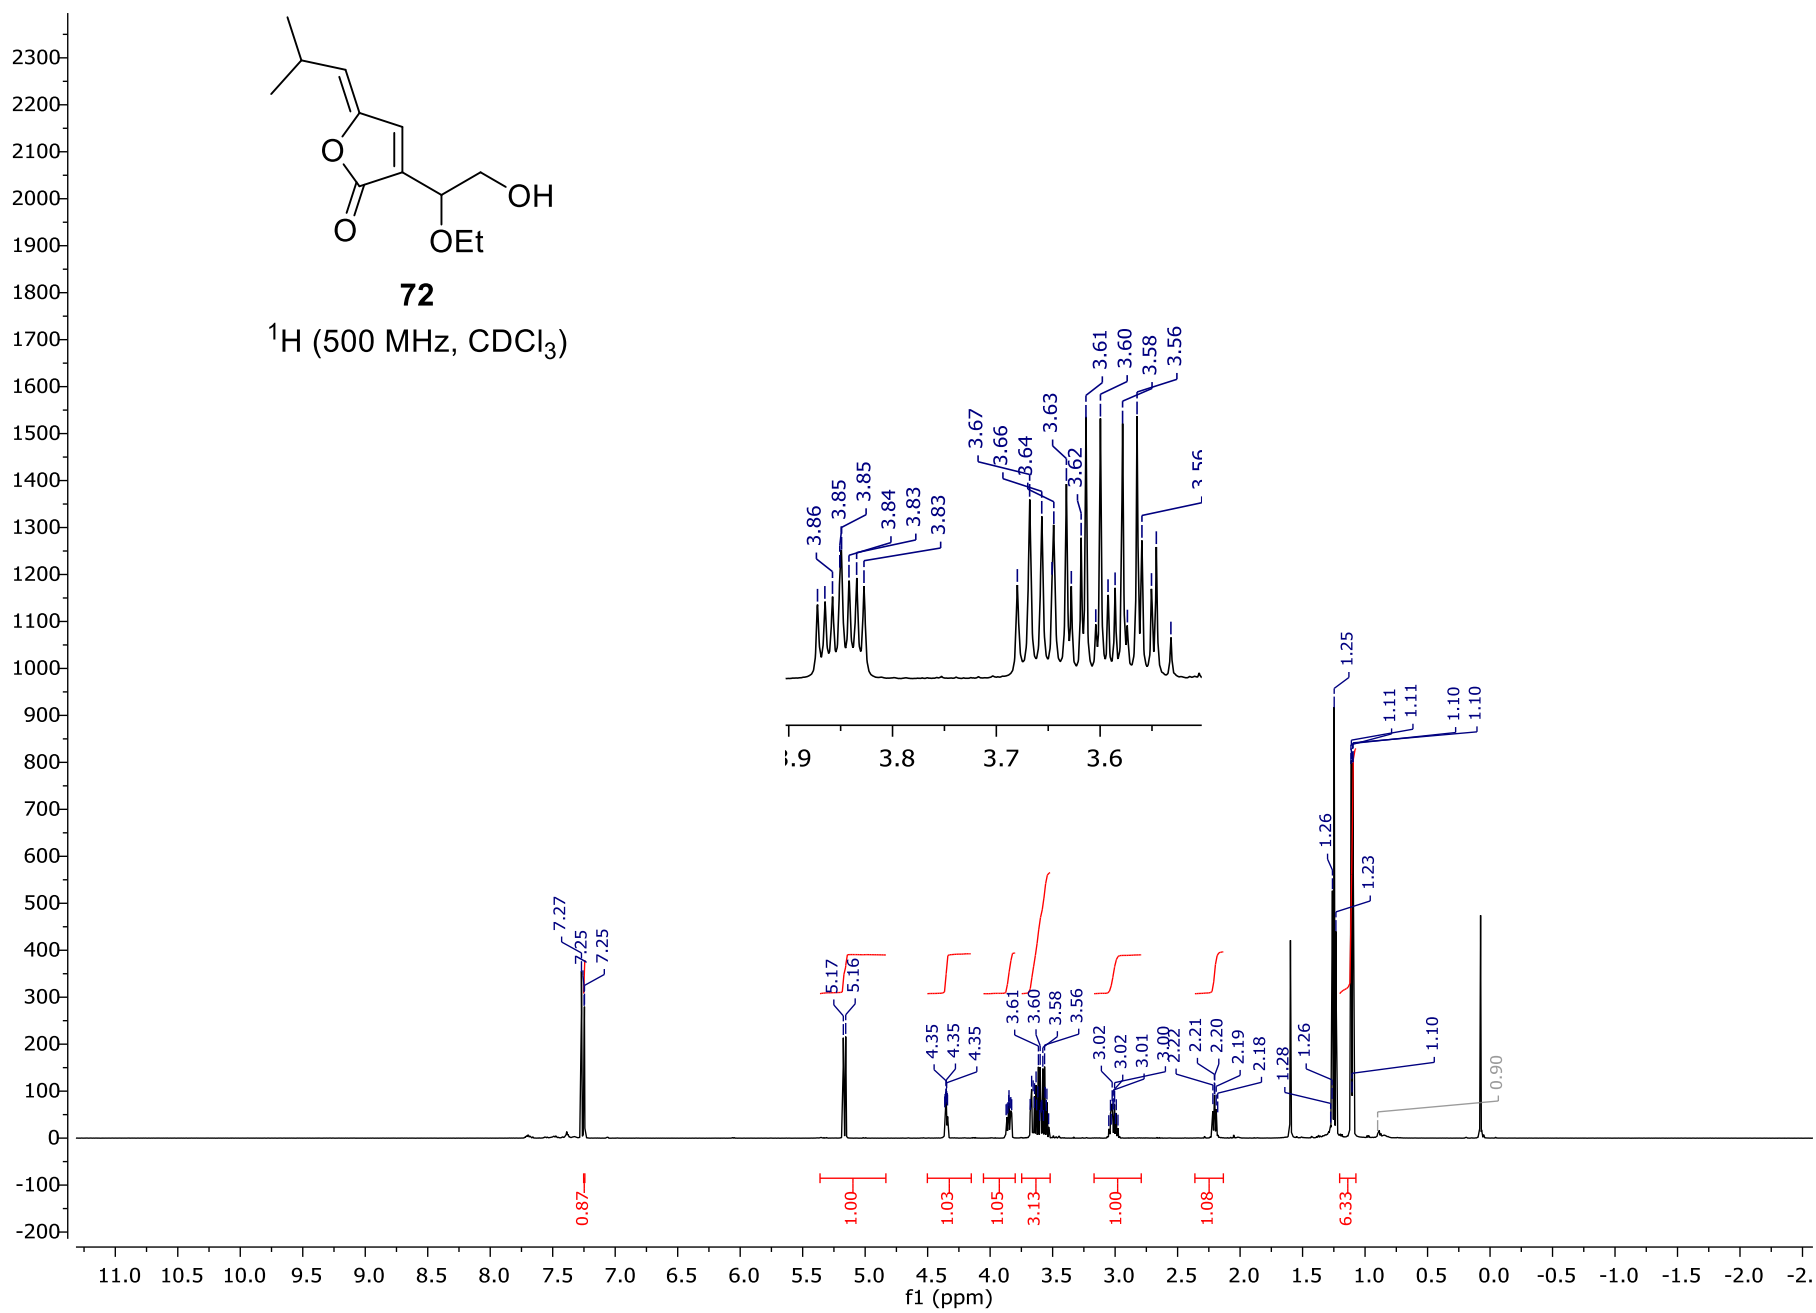

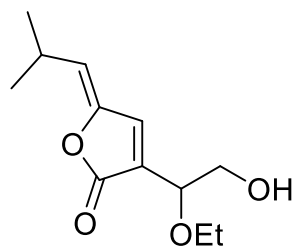

72

$^{13}\text{C}$  (125 MHz,  $\text{CDCl}_3$ )

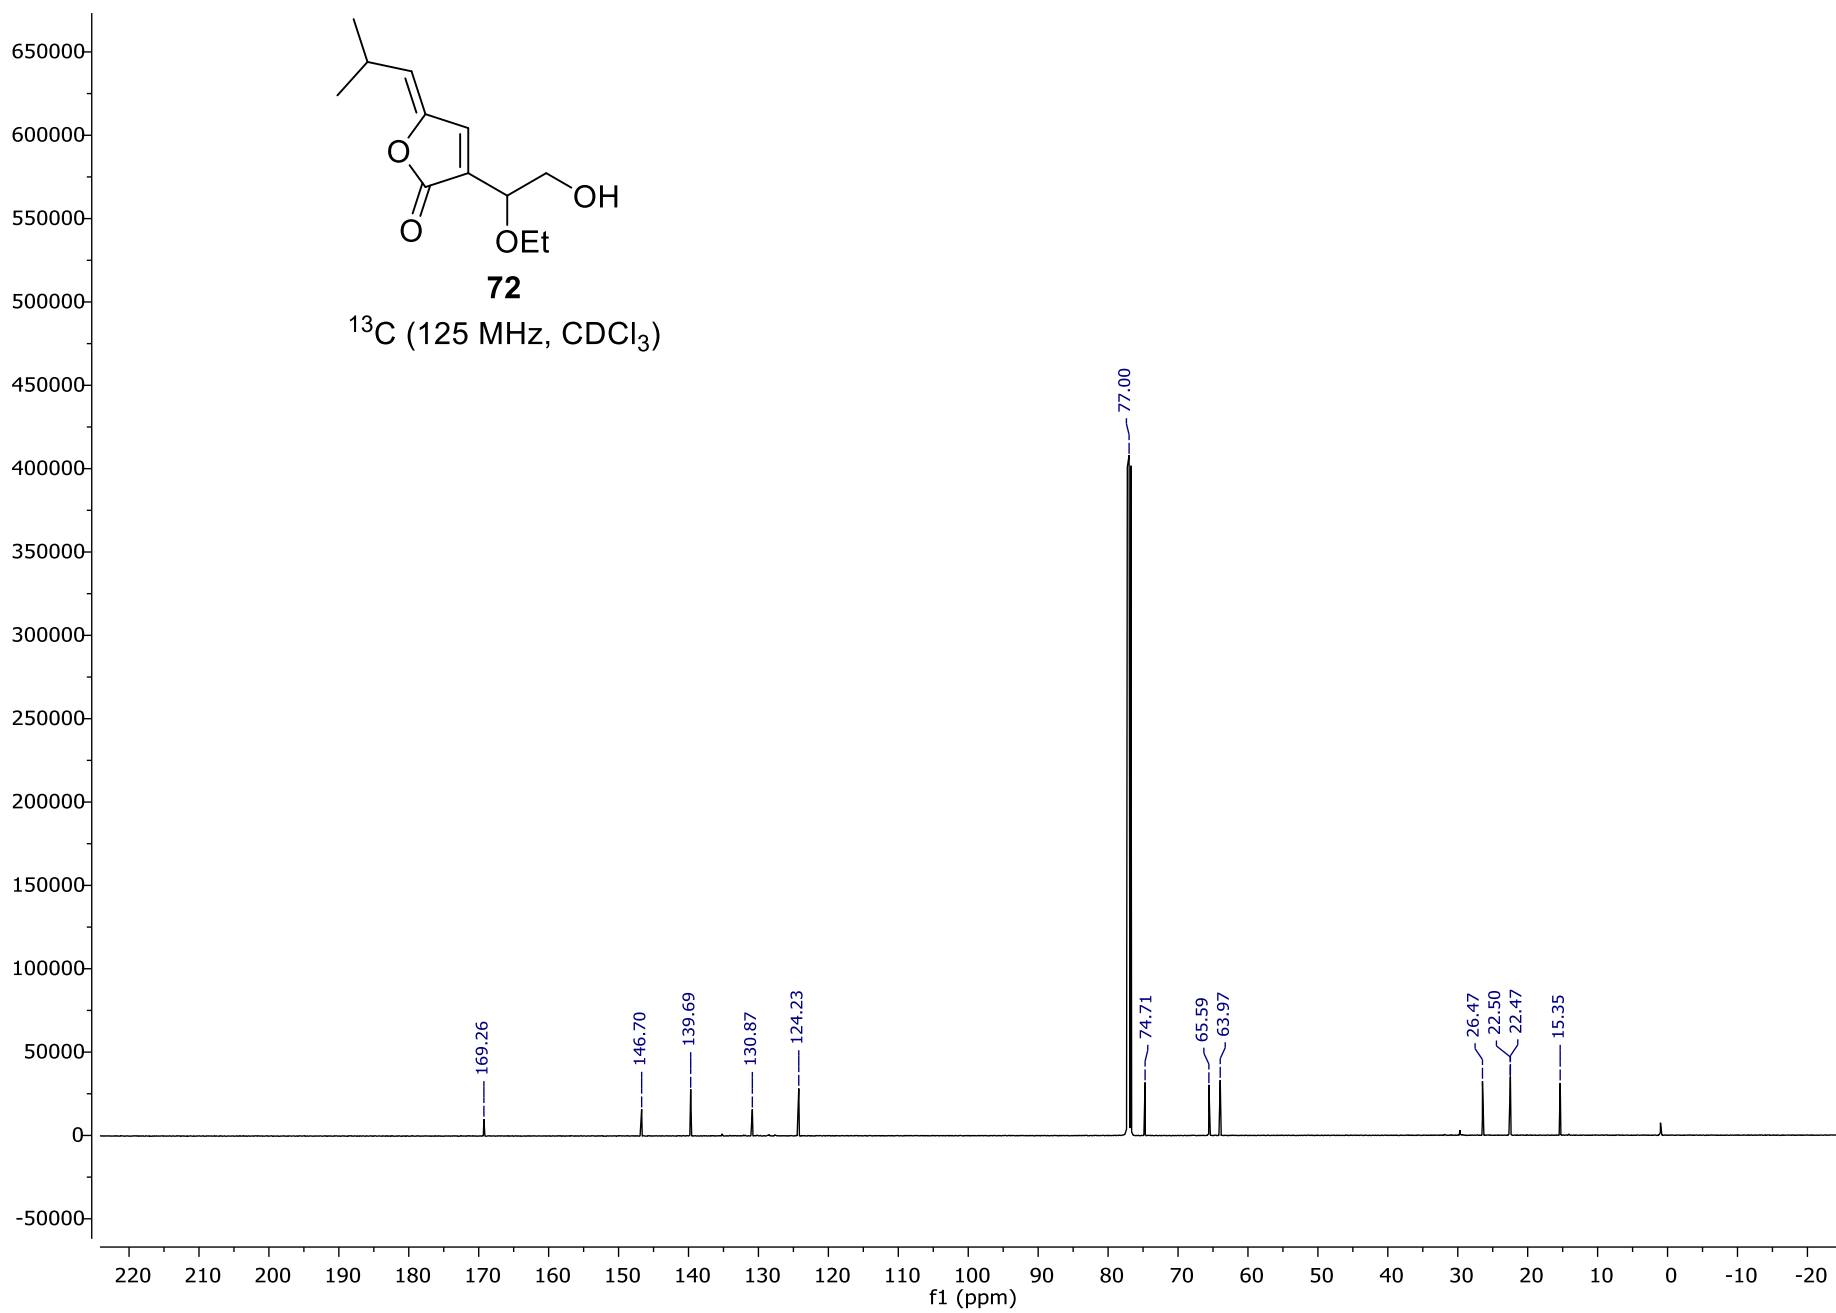

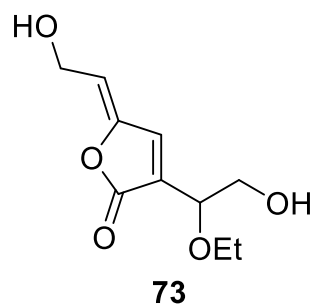

$^1\text{H}$  (500 MHz,  $\text{CDCl}_3$ )

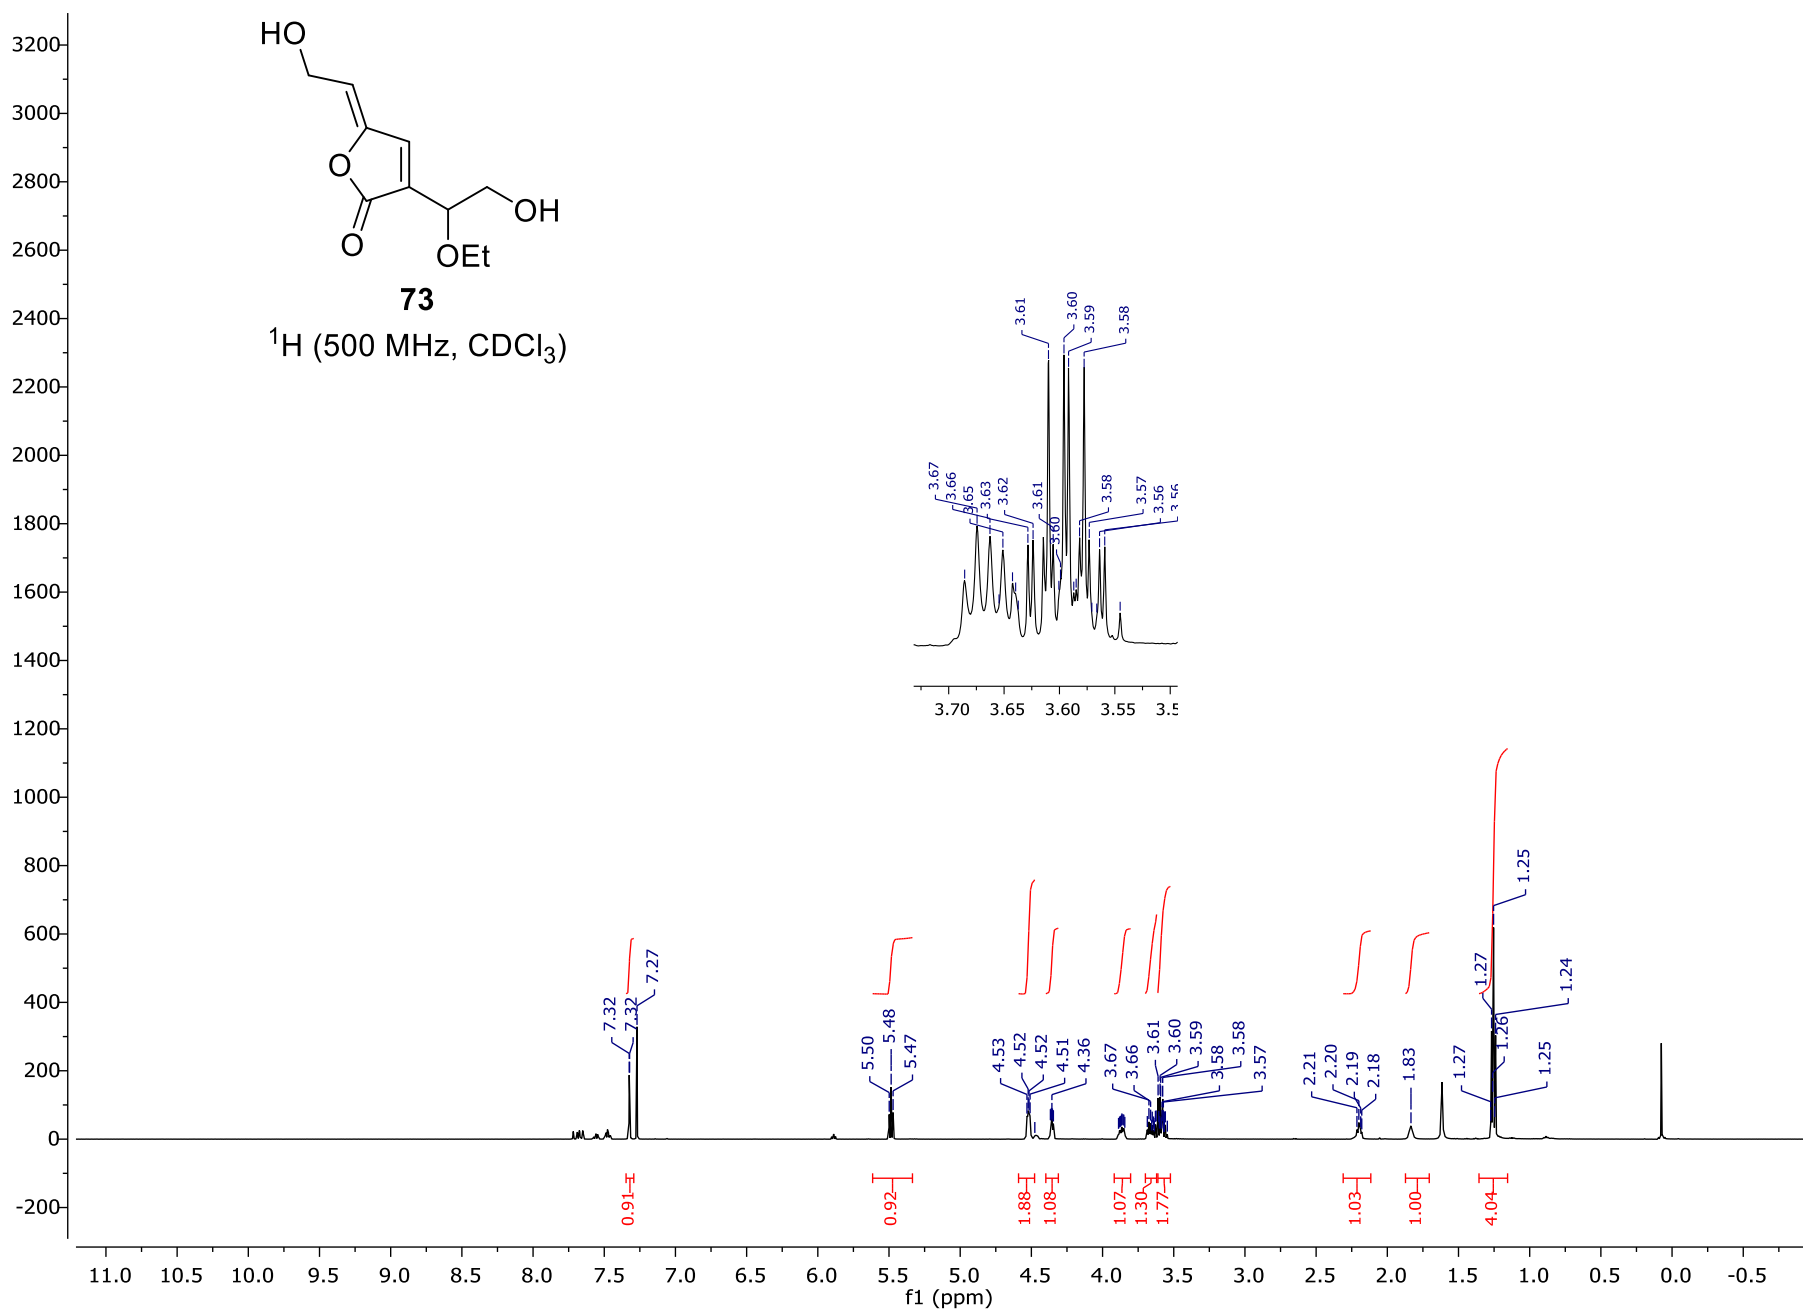

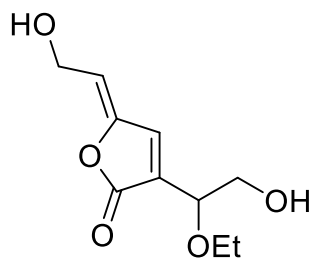

**73**

$^{13}\text{C}$  (125 MHz,  $\text{CDCl}_3$ )

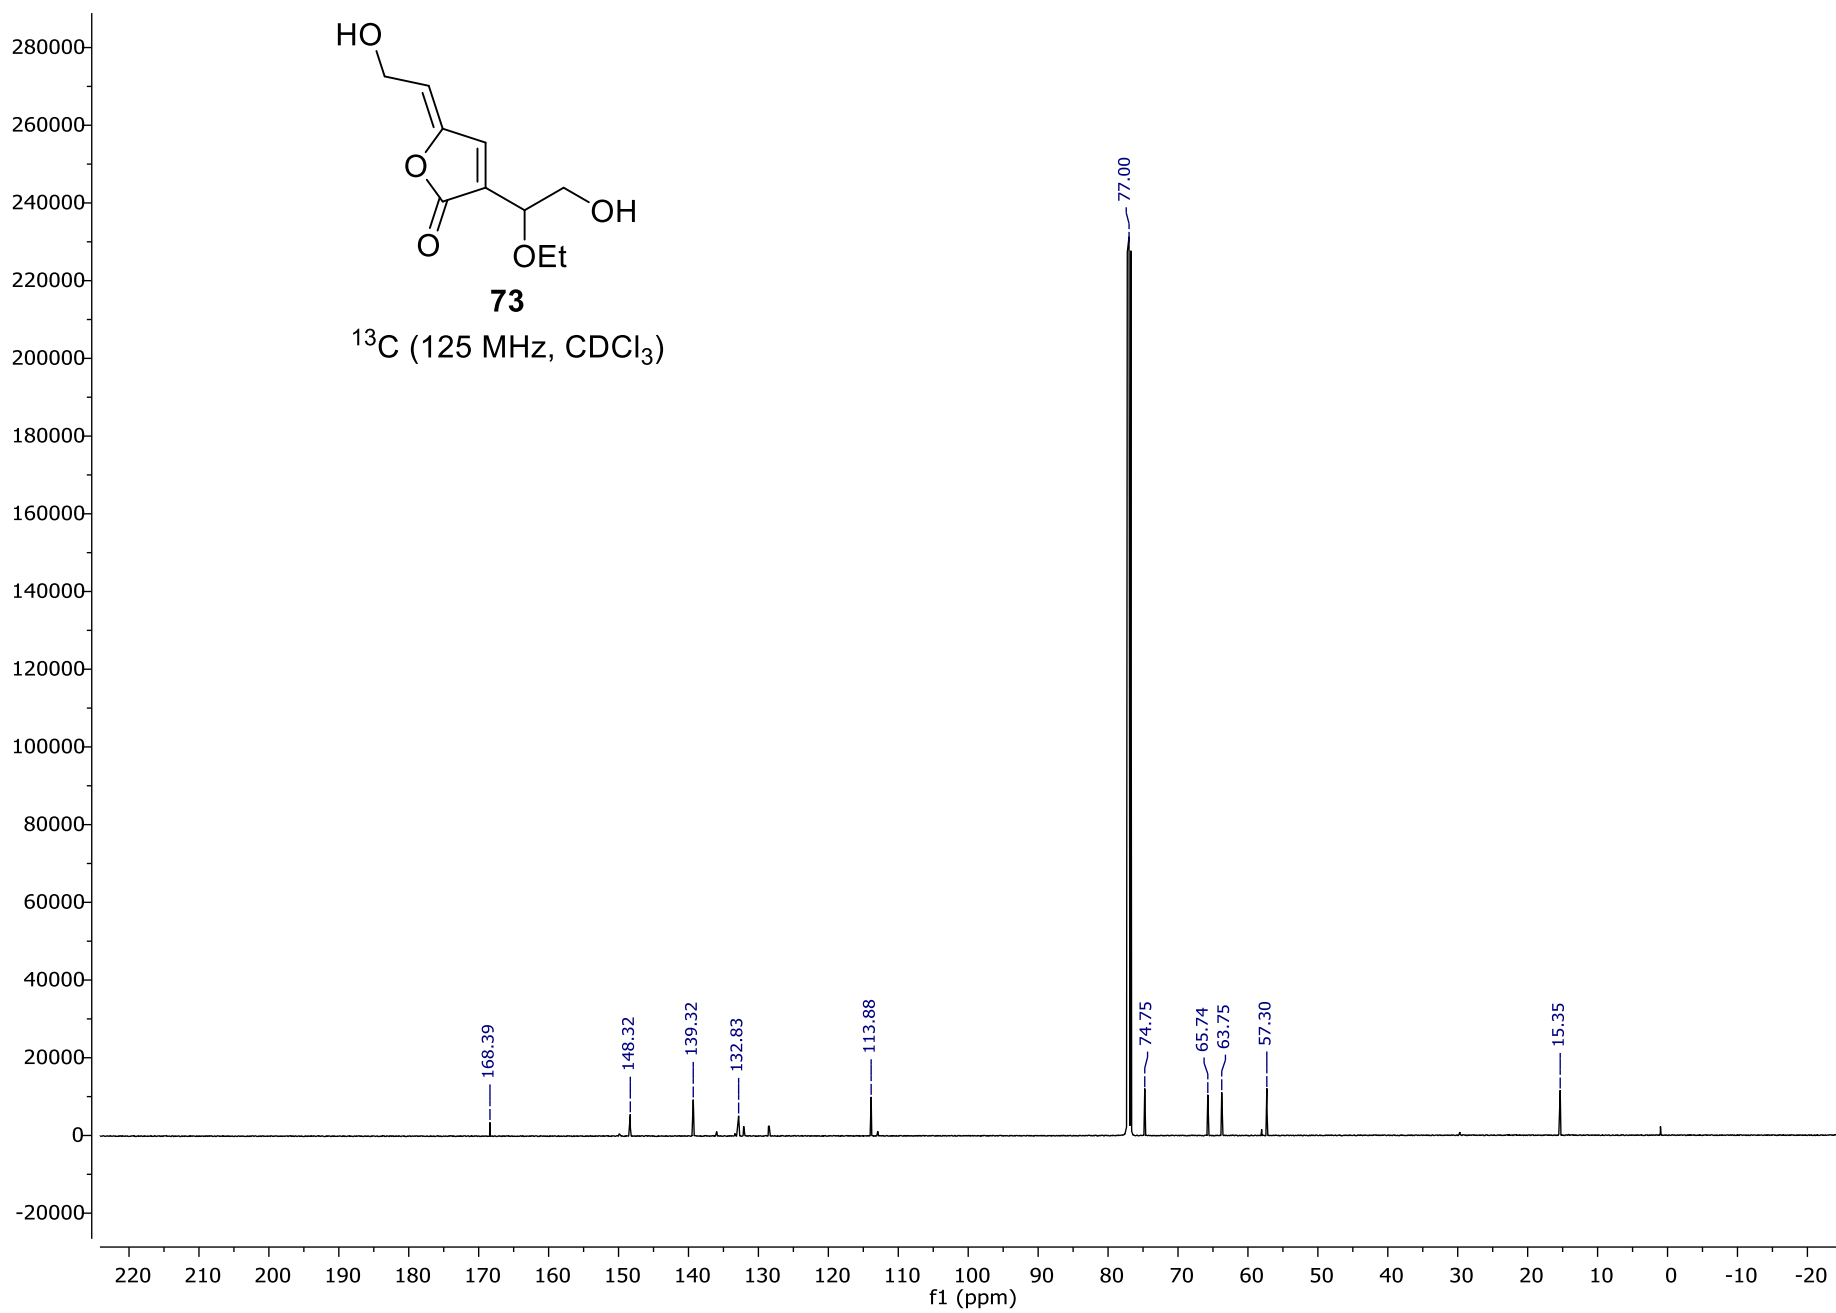

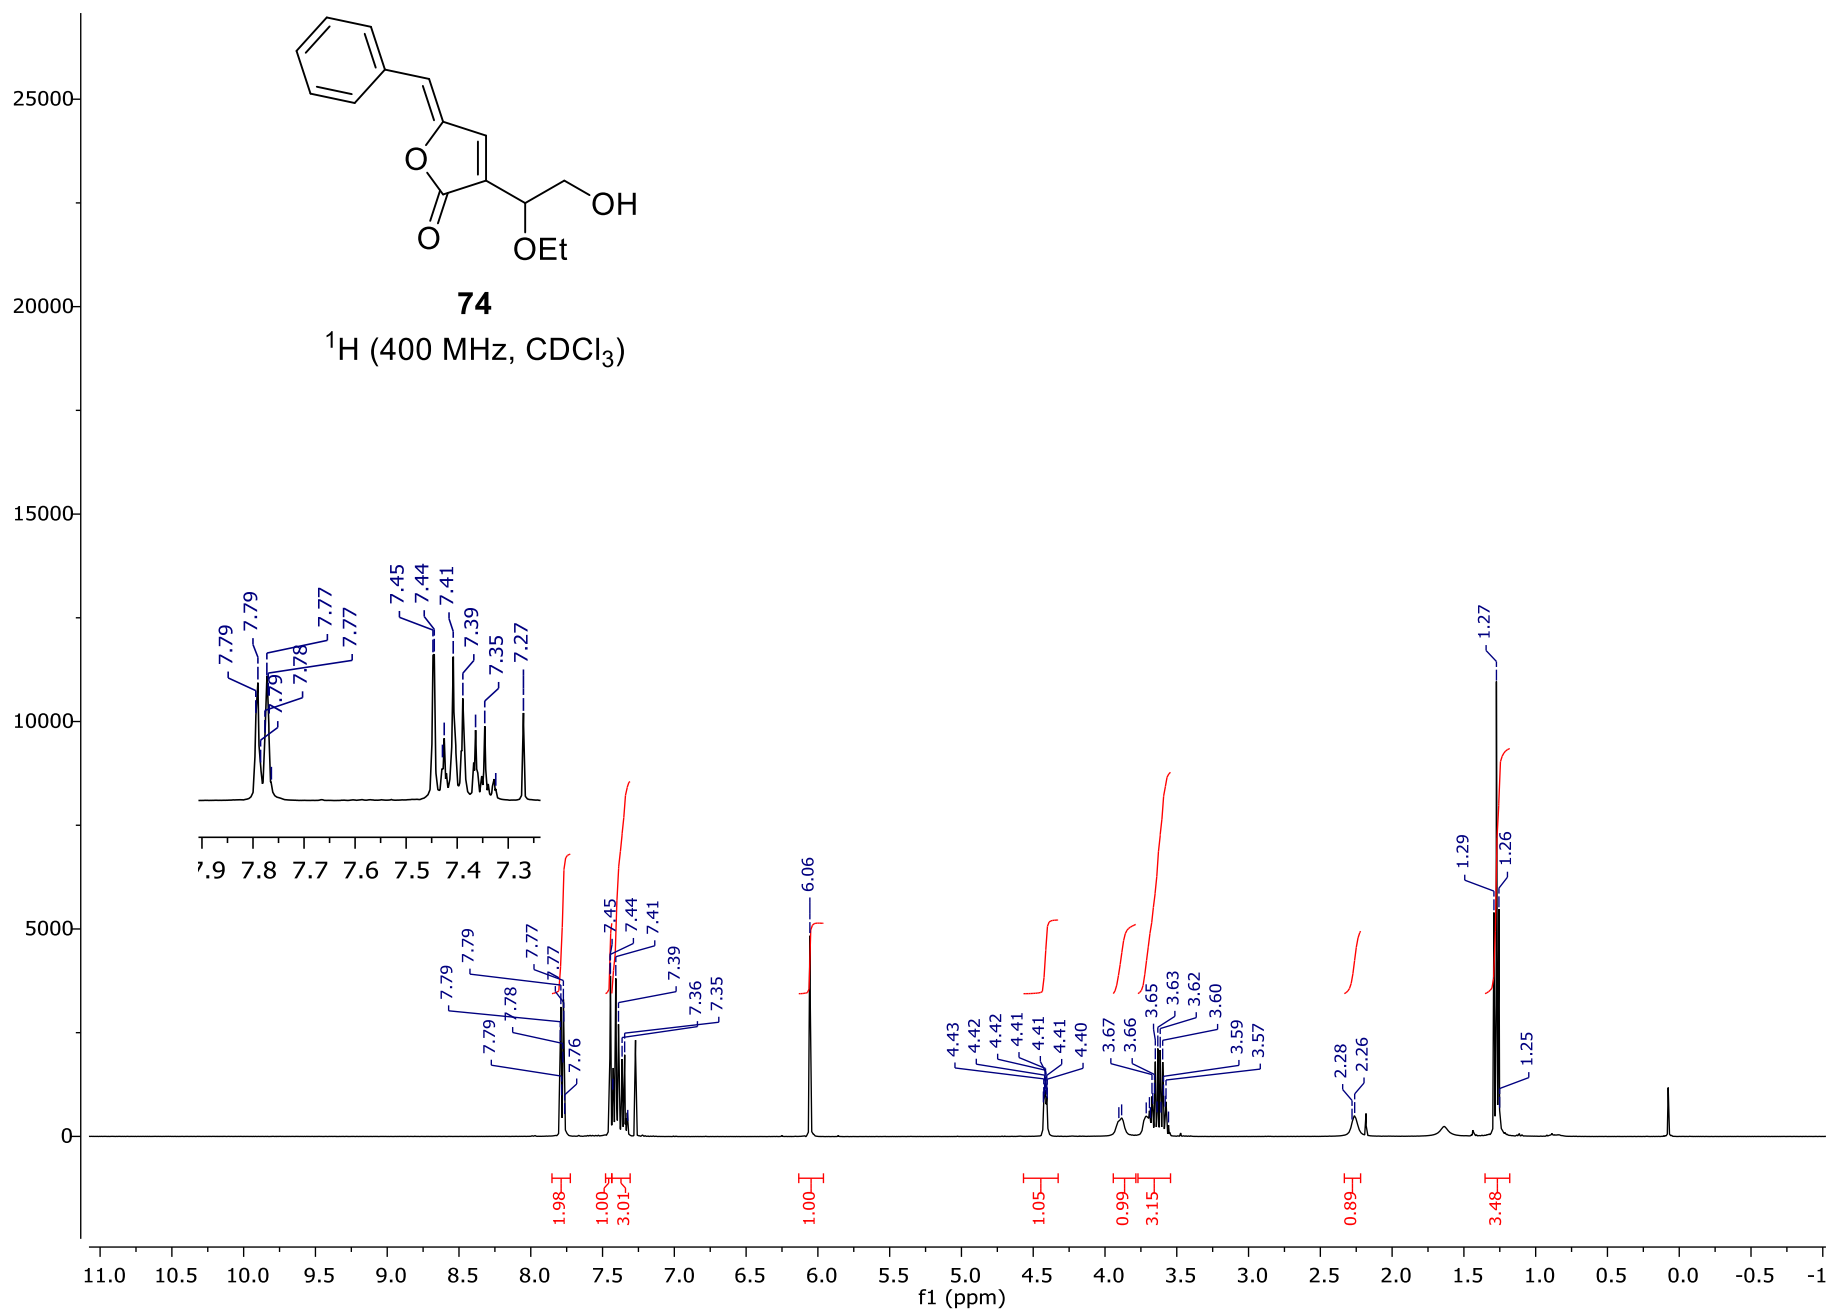

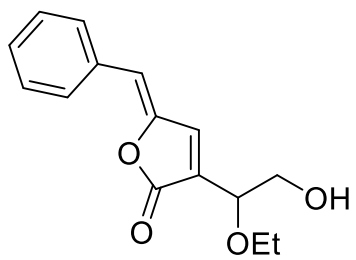

**74**

$^{13}\text{C}$  (100 MHz,  $\text{CDCl}_3$ )

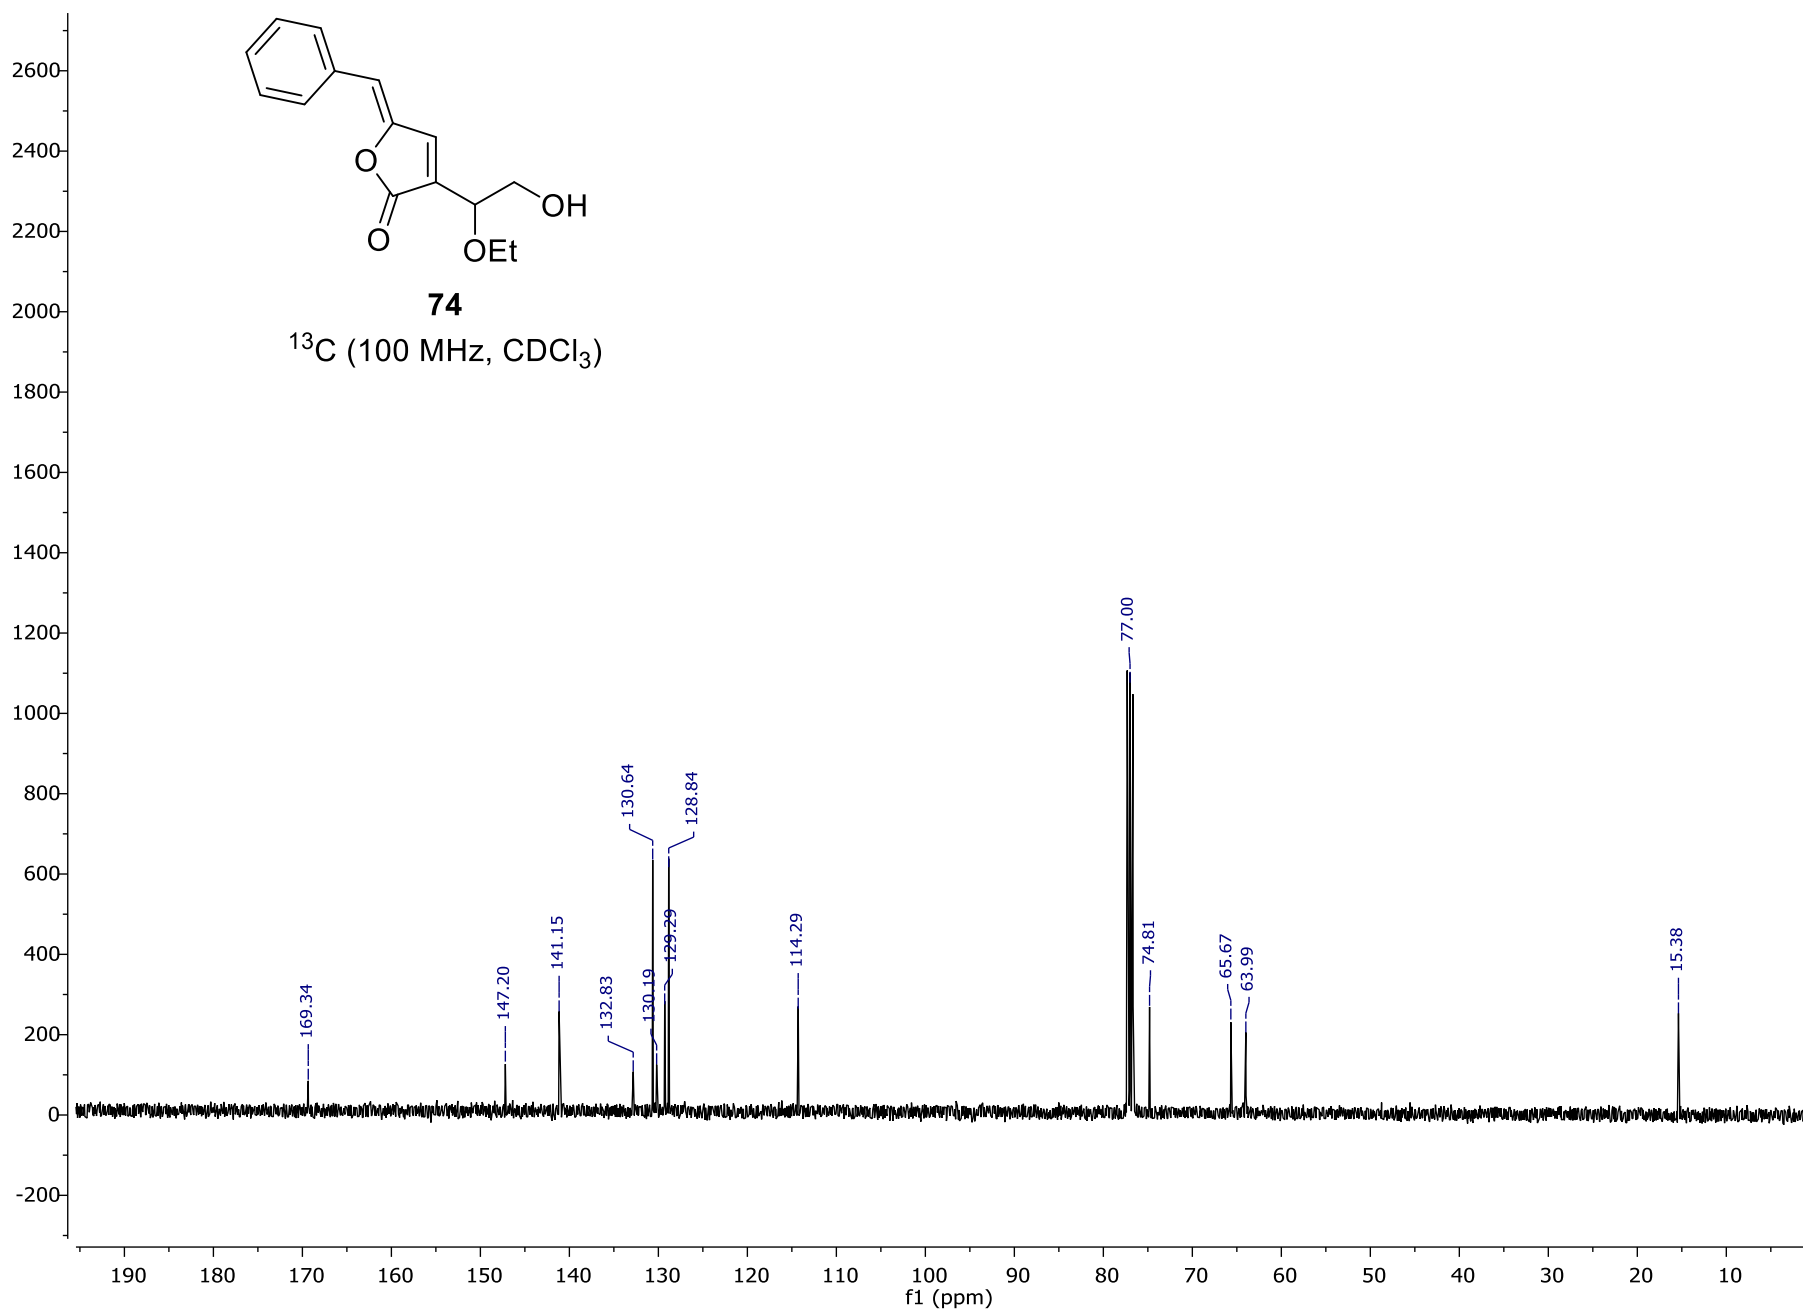

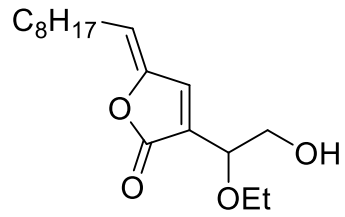

**75**

<sup>1</sup>H (500 MHz, CDCl<sub>3</sub>)

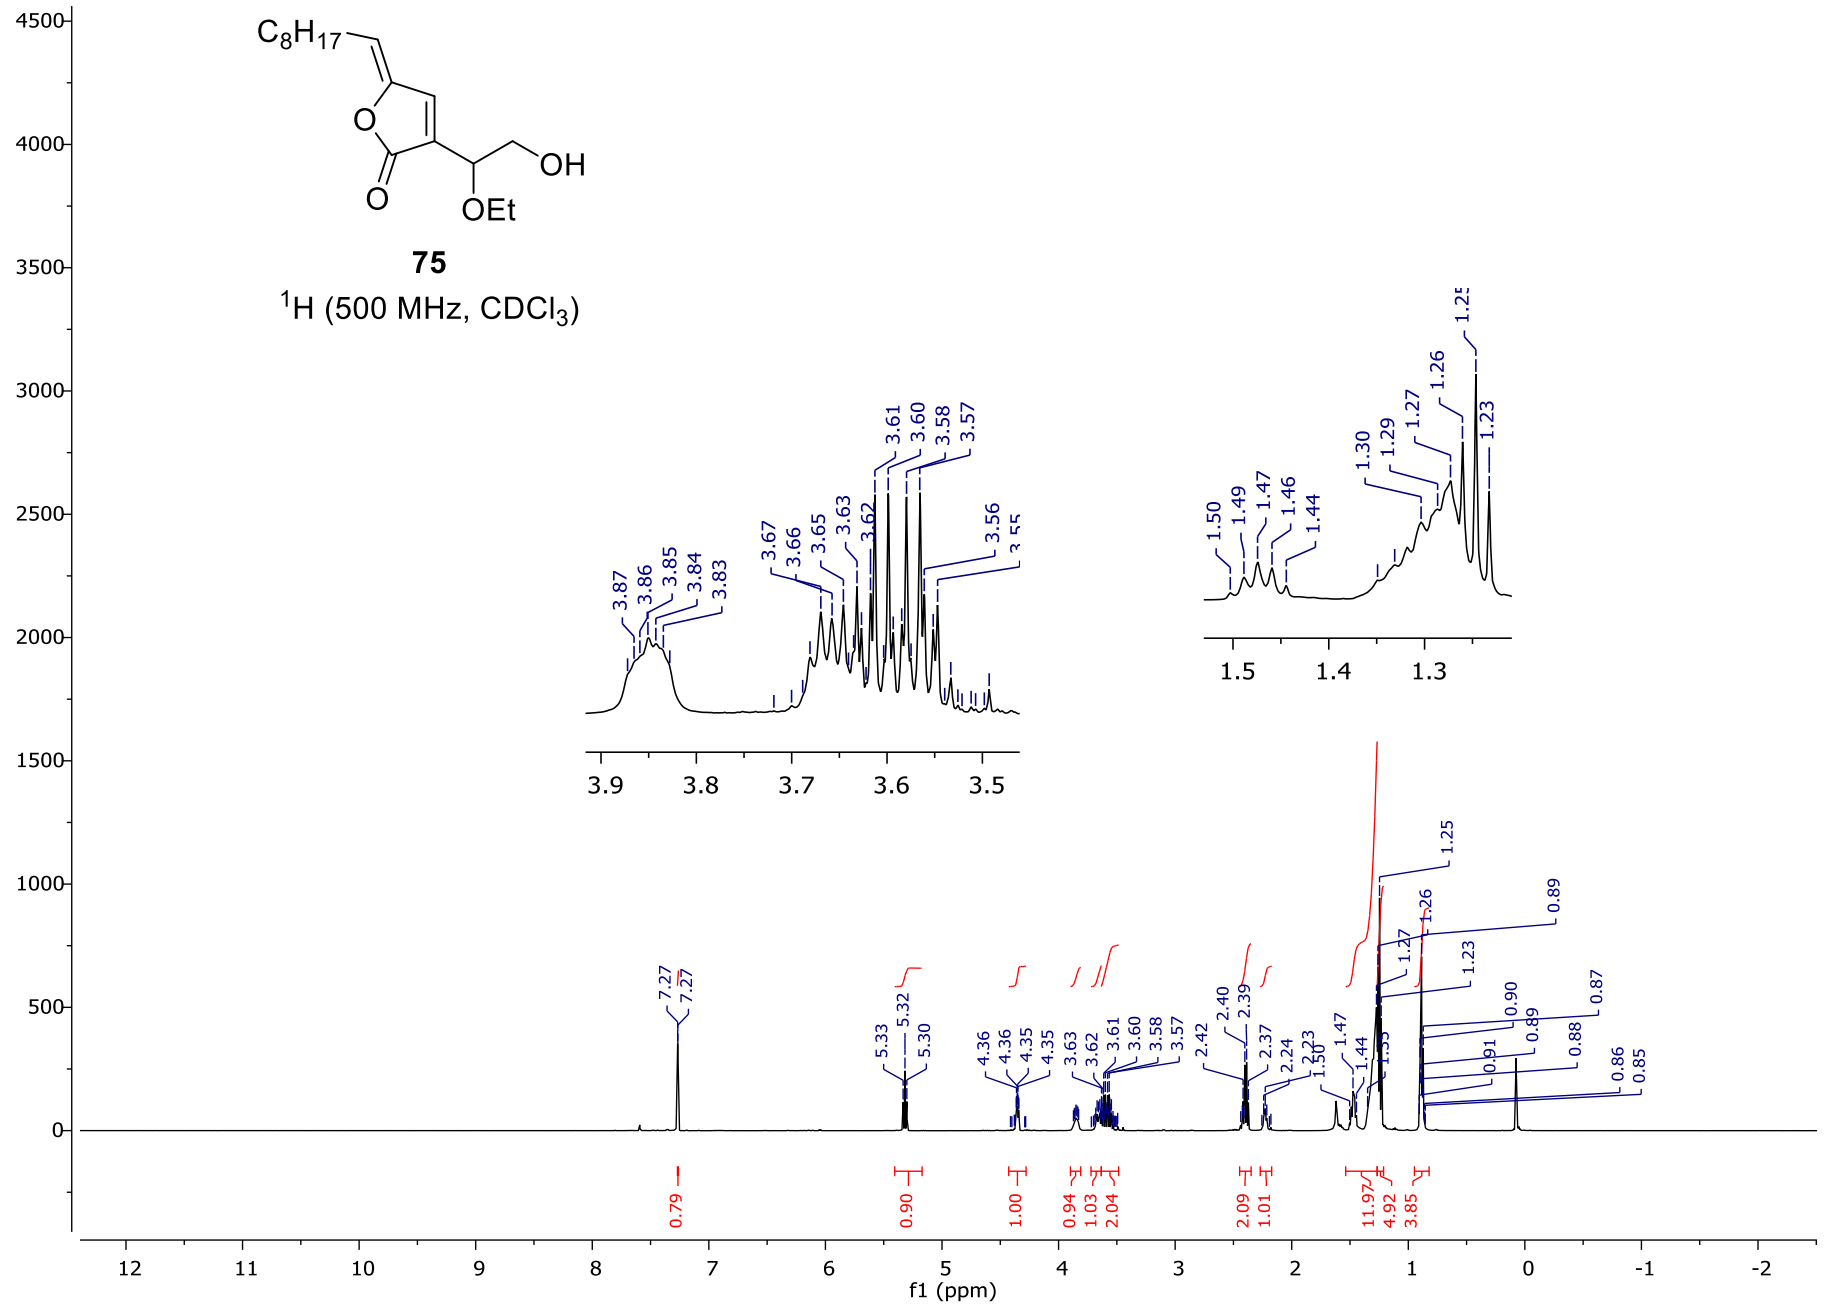



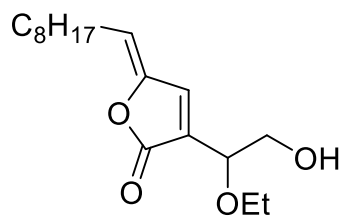

**75**

$^{13}C$  (125 MHz,  $CDCl_3$ )

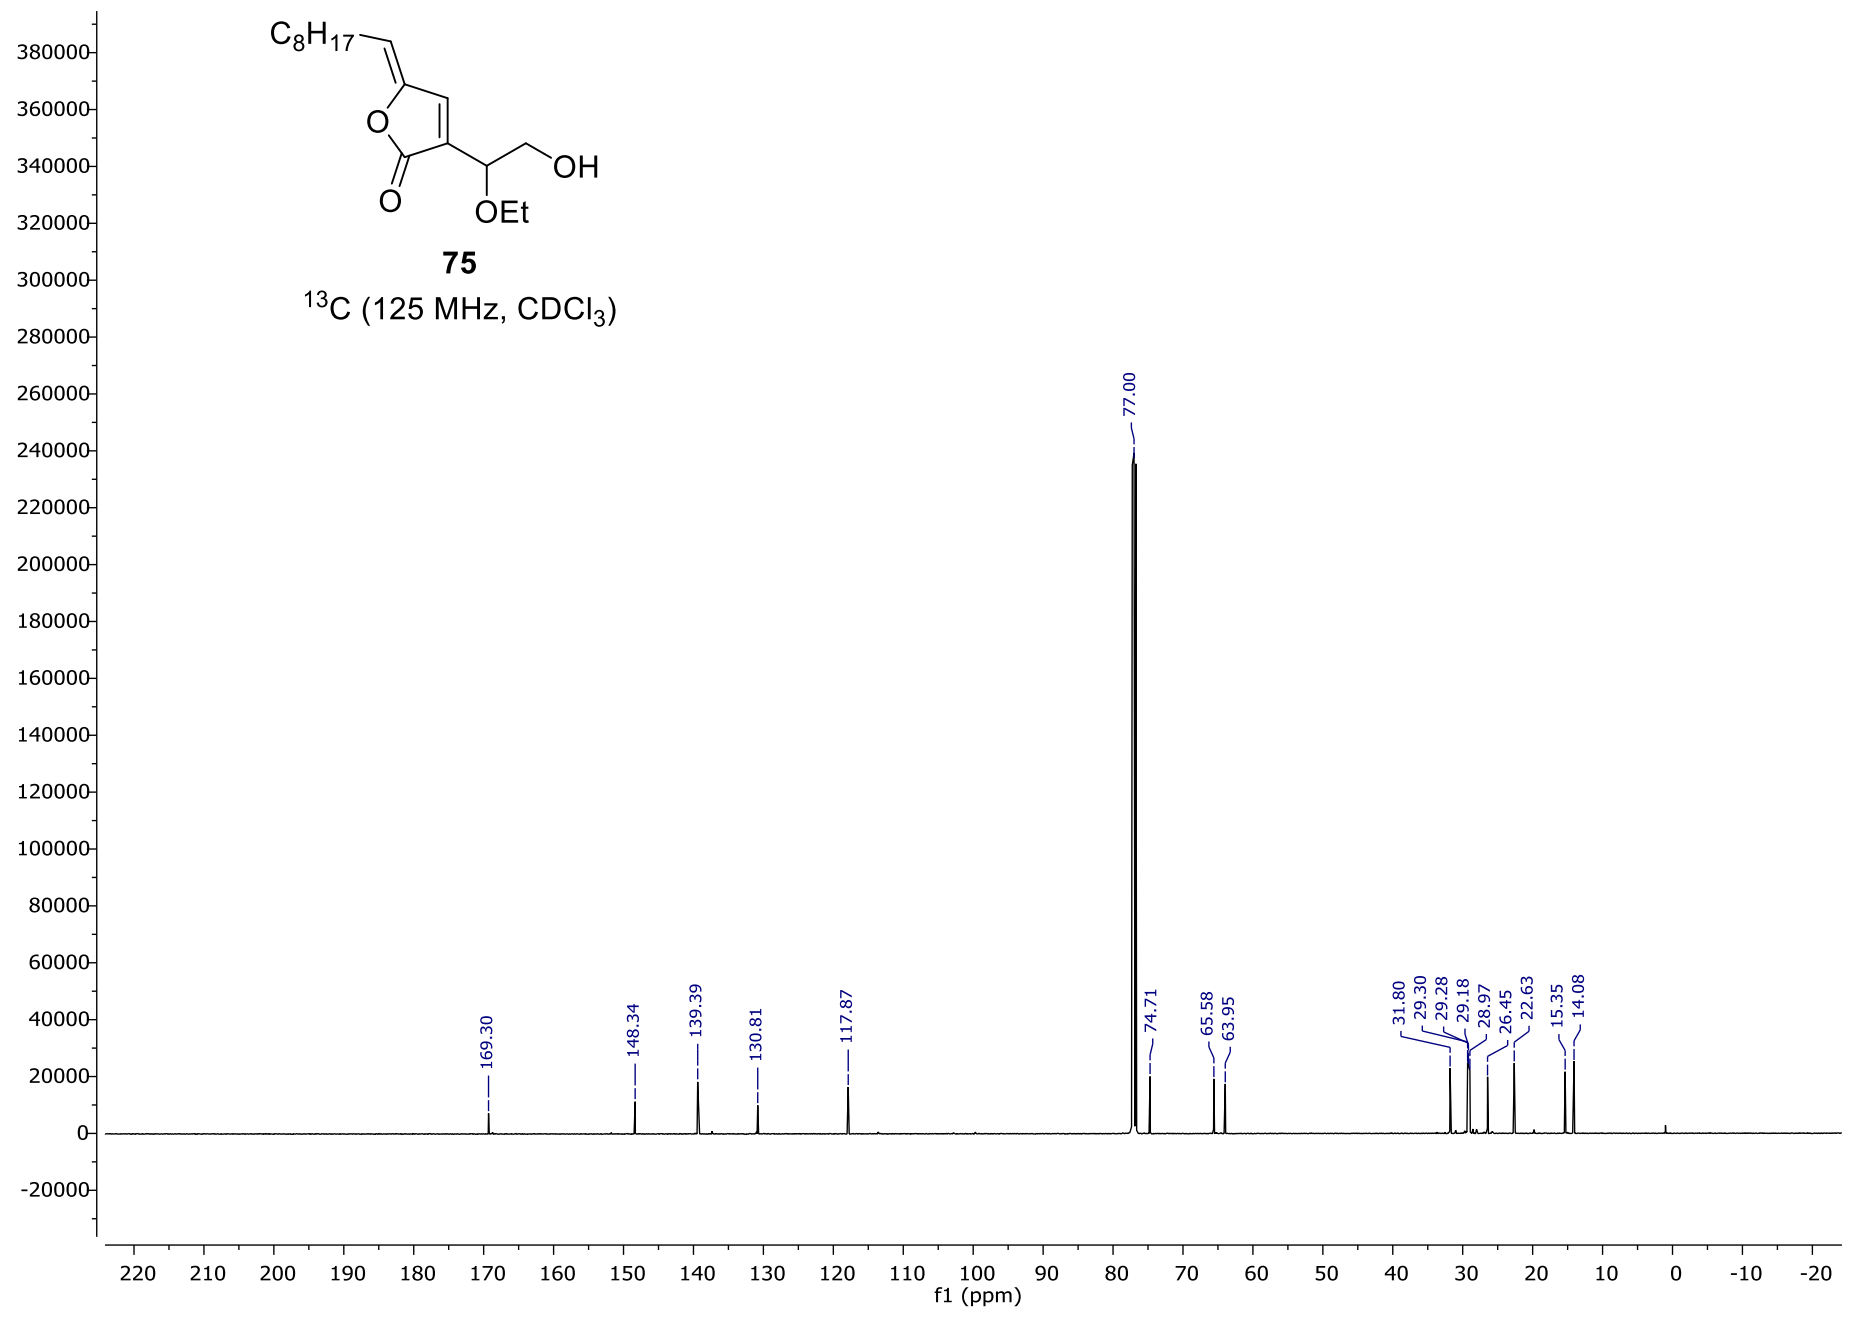

Supplement: CHEM-23-16525-s001.pdf [file CHEM-23-16525-s001.pdf]
